# Supplementary material for: The role of Mineralocorticoid Receptor pathway in Ocular Rosacea
Source: Research Square preprint supplement (doi:10.21203/rs.3.rs-6589915/v1), 2025-08-06
Supplement: Supplementary file 1 [file 4e16a104b520a1f6838b09d9.docx]

Supplementary Table 5.

| **Gene Name** | **Forward/Reverse** | **Sequences** |
| --- | --- | --- |
| *18S* | Forward | TGCAATTATTCCCCATGAACG |
| *18S* | Reverse | GCTTATGACCCGCACTTACTGG |
| *Ubc* | Forward | ATCTAGAAAGAGCCCTTCTTGTGC |
| *Ubc* | Reverse | ACACCTCCCCATCAAACCC |
| *Hprt1* | Forward | GCGAAAGTGGAAAAGCCAAGT |
| *Hprt1* | Reverse | GCCACATCAACAGGACTCTTGTAG |
| *Nr3c2 (human)* | Forward | CCCTCTGAACATGACATCTTCG |
| *Nr3c2 (human)* | Reverse | CTGGAGCCTCGATTTTCAAC |
| *Nr3c2 (rat)* | Forward | TAAGTTTCCCCACGTGGTTC |
| *Nr3c2 (rat)* | Reverse | ATCCACGTCTCATGGCTTTC |
| *NR3C1 (rat)* | Forward | AAC ATG TTA GGT GGG CGT CAA |
| *NR3C1 (rat)* | Reverse | GGT GTA AGT TTC TCA AGC CTA GTA TCG |
| *Cmklr1* | Forward | TATTCTGCAACAGTGAACAG |
| *Cmklr1* | Reverse | AAGCTGTAGATTACCACCAG |
| *Itgb3* | Forward | AAAAACCCCTGTTACACTATG |
| *Itgb3* | Reverse | TTCACTTCGTCATTGAAGC |
| *Cfd* | Forward | CAAGCATTTGTATGATGTGC |
| *Cfd* | Reverse | TTGTGGGAGAGCTTAAAGAG |
| *Tlr3* | Forward | CTT AAA GAG TTT TCT CCA GGG |
| *Tlr3* | Reverse | ATT CTG GAT GCT TGT GTT TG |
| *Nos3* | Forward | CAC CGA TAC AAC ATA CTT GAG |
| *Nos3* | Reverse | CCT TCT GCT CAT TTT CCA AG |
| *Cd36* | Forward | AAG GAA TTT GTC CTA TTG GG |
| *Cd36* | Reverse | GAG ACT TCT CAA CAA AAG GTG |
| *Mcp-1* | Forward | TTC CTT ATT GGG GTC AGC AC |
| *Mcp-1* | Reverse | CAG TTA ATG CCC CAC TCA CC |
| *Clu* | Forward | AGC ACA TAA AGA CCC TCA TAG |
| *Clu* | Reverse | TCA GCT TCA TTT CAG AAT CC |
| *Vim* | Forward | CAGAACATGAAGGAAGAGATG |
| *Vim* | Reverse | TCCAGGTTAGTTTCTCTCAG |
| *Pmel* | Forward | TATAGAAGGATCCAGGAATCAG |
| *Pmel* | Reverse | ATGGAAAAGGAGGTATTTGC |
| *Col3a1* | Forward | TTT CAA GAT CAA CAC TGA GG |
| *Col3a1* | Reverse | TAT TCT CCG CTC TTG AGT TC |
| *Col1a1* | Forward | GCC TCC CAG AAC ATC ACC TA |
| *Col1a1* | Reverse | ATG TCT GTC TTG CCC CAA GT |
| *Sdc4* | Forward | GAGATCTAGATGACACGGAG |
| *Sdc4* | Reverse | CATTCTCTTCCAGTTCCTTG |
| *Fnln5* | Forward | GTCAACATGAGTGTGTGAAC |
| *Fnln5* | Reverse | CACATTCATTGATATCCTGGC |
| *Cyp1b1* | Forward | CCACTATTACAGACATCTTTGG |
| *Cyp1b1* | Reverse | CATGACGTATGGTAAGTTGG |
| *Cyp1a1* | Forward | AACCATGACCAGGAACTATG |
| *Cyp1a1* | Reverse | AGAATGACCTTCTCACTCAG |
| *Pdha1* | Forward | CGTAATTTCGCAAATGATGC |
| *Pdha1* | Reverse | TCTGCTTATACAGCTGATCC |
| *Dld* | Forward | CAAGAATCAGGTTACAGCTAC |
| *Dld* | Reverse | CTTCATCAATCGTGATTCCG |
| *Crat* | Forward | GGAGTATACAAAGAAGCCTG |
| *Crat* | Reverse | GAAGTCCTTTCCAAAGTGATG |
| *Acsm3* | Forward | CATCACTGTCTTCTGTTCTG |
| *Acsm3* | Reverse | TCTGTCTGTCCATATCCTTC |
| *Kcnj8* | Forward | AATGTCAGGTCATTCACTTC |
| *Kcnj8* | Reverse | CTCAGTCATCATTCTCCCTC |
| *Gas1* | Forward | CCCCGTTTGCCTGTTTTCTG |
| *Gas1* | Reverse | CAGTGCTCCGATCATCTCC |
| *Wipf1* | Forward | TCTACTTCCATCCGATTTCC |
| *Wipf1* | Reverse | TCTTCTGTTGGATCCACTTC |
| *Stc1* | Forward | TGT TCT ACT TTC CAG AGG ATG |
| *Stc1* | Reverse | TCT GTT GTA GTA TCT GTT GGA G |
| *Tf* | Forward | AACCATATTTGAGGTCTTGC |
| *Tf* | Reverse | CTCTTTGCCATCTCCATTTC |
| *Csrp1* | Forward | CATCCAAGTTTGCTCAGAAG |
| *Csrp1* | Reverse | CCTTTGCAATAGATCTCACC |
| *Aifm1* | Forward | CAAGAAGTCTGTCTGCTATC |
| *Aifm1* | Reverse | GTAATTGACTTGACTTCCCG |

Table 6. List of primers used in this animals’ study

Suplemmentory Table 6.

| Antibodies | Dilution | Reference |
| --- | --- | --- |
| ***Primary antibodies*** | | |
| rabbit anti-P63α | 1:100 | Cell Signaling Technology, #4892, Ozyme, Saint-Cry-L’Ecole, France |
| rabbit anti-PPARγ | 1:100 | Cell Signaling Technology, #2435S |
| mouse anti Ki67 | 1:100 | Cell Signaling Technology, #9449 (8D5), Massachusetts, USA |
| rabbit anti Cytokeratin 1 | 1:500 | Abcam, #ab185628 |
| rabbit anti Cytokeratin 10 | 1:500 | Abcam, #ab76318 |
| rabbit anti Cytokeratin 14 | 1:500 | Abcam, #ab181595 |
| rabbit anti-IBA1 | 1:400 | Wako #019-19741, Richmond, VA, USA |
| mouse anti-ED1 | 1:200 | Bio-Rad #MCA341R, Colmar, France |
| rabbit anti TIM23 | 1:100 | Proteintech #11123-1-AP, Planegg-Martinsried, Germany |
| rabbit anti TOM20 | 1:400 | Proteintech #11802-1-AP |
| mouse anti E-Cadherin | 1:400 | Abcam #ab231303 |
| rabbit anti ZO-1 | 1:200 | Thermo Fisher Scientific, #40-2200 |
| mouse monoclonal anti-MR 6G1 | 1:2000 | Merck, #MABS496, Darmstadt, Germany |
| rabbit anti-GR | 1:1500 | Santa Cruz Biotechnology, #sc-393232, Texas, USA |
| mouse anti-11β-HSD1 | 1:500 | Santa Cruz Biotechnology, Texas, USA |
| mouse anti-11β-HSD2 | 1:500 | Santa Cruz Biotechnology, Texas, USA |
| rabbit anti-Nitrotyrosine | 1:200 | Thermo Fisher Scientific, #BS-8551R, Saint Aubin, France |
| rabbit anti-4-Hydroxynonenal (4-HNE) | 1:200 | Abcam, ab46545, Cambridge, UK |
| rabbit anti-S100A9 | 1:300 | Abcam, ab63818 |
| ***Secondary antibodies*** |  |  |
| Alexa Fluor 488-conjugated goat anti-rabbit IgG | 1:200 | Thermo Fisher Scientific, #A11008 |
| Alexa Fluor, Alexa Fluor 488-conjugated donkey anti-mouse IgG | 1:200 | Thermo Fisher Scientific,  # A-21202 |
| Alexa Fluor 594-conjugated goat anti-rabbit IgG | 1:200 | Thermo Fischer Scientific, #A11012 |
| Alexa Fluor 594-conjugated donkey anti-mouse IgG | 1:200 | Thermo Fischer Scientific, #21203 |
| biotinylated goat anti-mouse secondary antibody | 1:500 | Vector Laboratories, #BA-2000, Eurobio Scientific, Les Ulis, France |
| biotinylated goat anti-rabbit secondary antibody | 1:500 | Vector Laboratories, #BA-1000, Eurobio Scientific, Les Ulis, France |

Table 7. List of antibodies used in immunofluorescence study
