# Supplementary material for: The role of Mineralocorticoid Receptor pathway in Ocular Rosacea
Source: Research Square preprint supplement (doi:10.21203/rs.3.rs-6589915/v1), 2025-08-06
Supplement: Supplementary file 2 [file 72fa665454079e3a730319f4.xlsx]

## Sheet: Supplementary Table 1
FeatureID	EntrezID	Gene Name	TranscriptType	GeneBiotype	logFC	FC	PValue	FDR	Status	C_WT_396953_MG	C_WT_235951_MG	C_WT_396025_MG	C_WT_91431_MG	U_WT_713642_MG	U_WT_395857_MG	U_WT_904250_MG
A2m	<a href='https://www.ncbi.nlm.nih.gov/gene/?term=24153' target="_blank"> 24153 </a>	alpha-2-macroglobulin	protein_coding	protein_coding	1.32492	2.50518	0.0146758	0.0702767	Not regulated	0.21	0.2	0.13	0.08	0.22	0.56	0.36
A3galt2	<a href='https://www.ncbi.nlm.nih.gov/gene/?term=171553' target="_blank"> 171553 </a>	alpha 1,3-galactosyltransferase 2	protein_coding	protein_coding	0.495703	1.41001	1.08678e-05	0.000226521	Not regulated	9.04	9.57	10.15	8.01	13.24	13.85	11.91
Aaas	<a href='https://www.ncbi.nlm.nih.gov/gene/?term=300259' target="_blank"> 300259 </a>	aladin WD repeat nucleoporin	protein_coding	protein_coding	0.313054	1.24233	0.00227209	0.0170702	Not regulated	17.74	16.38	17.93	16.27	19.52	22.95	21.34
AABR07000398.1	<a href='https://www.ncbi.nlm.nih.gov/gene/?term=NA' target="_blank"> NA </a>				1.69666	3.24149	3.15012e-07	1.1748e-05	Up in F_UVB_WT_MG	5.95	6.56	2.12	5.52	11.81	19.22	18.3
AABR07000658.2	<a href='https://www.ncbi.nlm.nih.gov/gene/?term=NA' target="_blank"> NA </a>				0.744384	1.67526	0.0251814	0.103866	Not regulated	1.76	1.31	1.6	1.12	2.22	3.25	1.84
AABR07001064.1	<a href='https://www.ncbi.nlm.nih.gov/gene/?term=NA' target="_blank"> NA </a>				0.135313	1.09833	0.627023	0.798611	Not regulated	1.51	1.29	1.57	0.99	1.46	1.77	1.21
AABR07001382.1	<a href='https://www.ncbi.nlm.nih.gov/gene/?term=NA' target="_blank"> NA </a>				-0.542345	-1.45634	0.000836918	0.00777731	Down in F_UVB_WT_MG	7.2	7.09	6.38	4.63	3.43	5.15	3.49
AABR07001512.1	<a href='https://www.ncbi.nlm.nih.gov/gene/?term=NA' target="_blank"> NA </a>				-5.08434	-33.9265				0	13.32	0.28	0	0	0	0.26
AABR07001519.1	<a href='https://www.ncbi.nlm.nih.gov/gene/?term=NA' target="_blank"> NA </a>				-0.0770263	-1.05484	0.751207	0.872392	Not regulated	3.26	3.52	3.18	3.75	3.93	2.93	2.92
AABR07001896.1	<a href='https://www.ncbi.nlm.nih.gov/gene/?term=NA' target="_blank"> NA </a>				-0.0465134	-1.03277	0.836538	0.922714	Not regulated	1.9	2.29	2.16	1.8	1.67	2.35	1.98
AABR07001902.1	<a href='https://www.ncbi.nlm.nih.gov/gene/?term=NA' target="_blank"> NA </a>				-1.01894	-2.02643	0.171414	0.373133	Not regulated	13.45	16.94	9.84	61.4	15.41	14.01	8.26
AABR07001905.2	<a href='https://www.ncbi.nlm.nih.gov/gene/?term=NA' target="_blank"> NA </a>				-0.323553	-1.25141	0.0165116	0.0764526	Not regulated	4.26	5.12	4.64	4.21	3.32	3.85	4.8
AABR07001910.1	<a href='https://www.ncbi.nlm.nih.gov/gene/?term=NA' target="_blank"> NA </a>				-0.0924284	-1.06616	0.649337	0.812236	Not regulated	4.15	2.22	3.45	3.62	2.89	3.22	3.27
AABR07001926.3	<a href='https://www.ncbi.nlm.nih.gov/gene/?term=NA' target="_blank"> NA </a>				-0.146143	-1.10661	0.59991	0.780686	Not regulated	1.11	0.86	1.28	1.44	0.84	1.34	1
AABR07002065.2	<a href='https://www.ncbi.nlm.nih.gov/gene/?term=NA' target="_blank"> NA </a>				0.0534223	1.03772	0.719324	0.855367	Not regulated	4.24	3.75	4.01	3.7	4.1	3.68	3.64
AABR07002546.1	<a href='https://www.ncbi.nlm.nih.gov/gene/?term=NA' target="_blank"> NA </a>				-0.352453	-1.27673	0.448702	0.665272	Not regulated	0.54	0.79	0.56	0.95	0.79	0.52	0.38
AABR07002627.1	<a href='https://www.ncbi.nlm.nih.gov/gene/?term=NA' target="_blank"> NA </a>				-0.631569	-1.54925	0.00281338	0.0201684	Down in F_UVB_WT_MG	24.92	19.46	21.36	14.19	16.4	11.2	11.03
AABR07002774.1	<a href='https://www.ncbi.nlm.nih.gov/gene/?term=NA' target="_blank"> NA </a>				-0.0603504	-1.04272	0.747228	0.86999	Not regulated	2.06	2.68	2.65	2.32	2.16	2.99	2.07
AABR07002774.2	<a href='https://www.ncbi.nlm.nih.gov/gene/?term=NA' target="_blank"> NA </a>				-0.00181845	-1.00126	0.986011	0.993234	Not regulated	5.74	5.73	5.13	5.42	4.99	5.45	5.23
AABR07002774.4	<a href='https://www.ncbi.nlm.nih.gov/gene/?term=NA' target="_blank"> NA </a>				-0.0751605	-1.05348	0.540609	0.73923	Not regulated	3.03	3.41	3.39	3.32	3.05	3.02	3.3
AABR07002848.1	<a href='https://www.ncbi.nlm.nih.gov/gene/?term=NA' target="_blank"> NA </a>				0.500404	1.41461	0.000488801	0.00513049	Up in F_UVB_WT_MG	3.16	3.37	3.31	3.37	5.27	5.09	4.49
AABR07002868.1	<a href='https://www.ncbi.nlm.nih.gov/gene/?term=NA' target="_blank"> NA </a>				-0.146897	-1.10719	0.657659	0.81673	Not regulated	1.07	1.07	0.79	0.7	0.69	0.76	1
AABR07002945.1	<a href='https://www.ncbi.nlm.nih.gov/gene/?term=NA' target="_blank"> NA </a>				0.0576775	1.04079	0.712559	0.850708	Not regulated	5.33	5.28	4.82	5.48	5.82	5	5.47
AABR07002969.1	<a href='https://www.ncbi.nlm.nih.gov/gene/?term=NA' target="_blank"> NA </a>				-0.214998	-1.1607	0.00537118	0.0333299	Not regulated	55.55	56.32	52.48	58.27	45.65	51.91	46.68
AABR07003176.1	<a href='https://www.ncbi.nlm.nih.gov/gene/?term=NA' target="_blank"> NA </a>				-0.410395	-1.32905	0.0137793	0.0670952	Not regulated	3.59	3.62	3.75	3.22	2.69	2.4	2.9
AABR07003235.1	<a href='https://www.ncbi.nlm.nih.gov/gene/?term=NA' target="_blank"> NA </a>				1.15145	2.22137	0.0684519	0.206505	Not regulated	0.06	0.59	0.24	0.54	0.56	1.11	0.75
AABR07003537.1	<a href='https://www.ncbi.nlm.nih.gov/gene/?term=NA' target="_blank"> NA </a>				0.0383525	1.02694	0.869052	0.940639	Not regulated	8.81	10.13	9.46	8.96	9.55	8.19	10.99
AABR07004112.1	<a href='https://www.ncbi.nlm.nih.gov/gene/?term=NA' target="_blank"> NA </a>				0.356385	1.28021	0.352807	0.576873	Not regulated	1.95	0.93	1.07	0.96	1.4	1.69	1.63
AABR07004269.3	<a href='https://www.ncbi.nlm.nih.gov/gene/?term=NA' target="_blank"> NA </a>				0.179788	1.13272	0.528968	0.731367	Not regulated	1.19	1.22	1.17	1.23	1.17	1.74	1.23
AABR07005031.1	<a href='https://www.ncbi.nlm.nih.gov/gene/?term=NA' target="_blank"> NA </a>				-0.0314053	-1.02201	0.94759	0.976603	Not regulated	2.68	1.39	1.21	1.76	1.91	2.31	1
AABR07005588.1	<a href='https://www.ncbi.nlm.nih.gov/gene/?term=NA' target="_blank"> NA </a>				-0.161175	-1.1182	0.021237	0.0919304	Not regulated	65.9	65.56	64.91	71.44	60.09	59.58	59.7
AABR07005597.1	<a href='https://www.ncbi.nlm.nih.gov/gene/?term=NA' target="_blank"> NA </a>				0.87877	1.83881	1.97299e-05	0.000372154	Up in F_UVB_WT_MG	0.55	0.6	0.75	0.52	0.76	0.97	1.22
AABR07005775.1	<a href='https://www.ncbi.nlm.nih.gov/gene/?term=NA' target="_blank"> NA </a>				-0.383151	-1.30419	0.0862812	0.239985	Not regulated	304.41	379.64	403.41	302.23	301.09	344.86	154.37
AABR07005779.1	<a href='https://www.ncbi.nlm.nih.gov/gene/?term=NA' target="_blank"> NA </a>				0.0547351	1.03867	0.462218	0.675967	Not regulated	30.01	30.76	30.63	29.11	32.45	30.76	30.83
AABR07005821.1	<a href='https://www.ncbi.nlm.nih.gov/gene/?term=NA' target="_blank"> NA </a>				1.24755	2.37437	0.722653	0.857346	Not regulated	0.16	0	0.04	0	0	0.37	0
AABR07005844.1	<a href='https://www.ncbi.nlm.nih.gov/gene/?term=NA' target="_blank"> NA </a>				0.480067	1.39481	0.000524447	0.00539791	Not regulated	15.81	17.95	12.45	13.51	19.77	18.94	23.74
AABR07005985.1	<a href='https://www.ncbi.nlm.nih.gov/gene/?term=NA' target="_blank"> NA </a>				0.0381417	1.02679	0.939904	0.972911	Not regulated	0.82	0.67	0.67	0.15	0.55	0.54	0.62
AABR07006032.1	<a href='https://www.ncbi.nlm.nih.gov/gene/?term=NA' target="_blank"> NA </a>				1.71349	3.27952	0.0210305	0.0912978	Not regulated	3.29	1.25	2.56	0.61	3.08	11.59	4.04
AABR07006049.1	<a href='https://www.ncbi.nlm.nih.gov/gene/?term=NA' target="_blank"> NA </a>				-1.38168	-2.60571	0.000777723	0.00735051	Down in F_UVB_WT_MG	3.2	3.55	3.9	4.38	1.24	1.86	1.27
AABR07006724.1	<a href='https://www.ncbi.nlm.nih.gov/gene/?term=NA' target="_blank"> NA </a>				-0.0167485	-1.01168	0.955997	0.979784	Not regulated	1.54	1.4	0.99	1.04	0.96	1.67	1.16
AABR07007032.1	<a href='https://www.ncbi.nlm.nih.gov/gene/?term=NA' target="_blank"> NA </a>				-0.172299	-1.12685	0.118634	0.295374	Not regulated	58.67	56.55	55.78	46.9	42.03	49.93	49.19
AABR07007068.1	<a href='https://www.ncbi.nlm.nih.gov/gene/?term=NA' target="_blank"> NA </a>				-0.610322	-1.5266	0.0279804	0.111524	Not regulated	2.28	3.32	3.96	2.75	1.69	2.65	1.77
AABR07007642.1	<a href='https://www.ncbi.nlm.nih.gov/gene/?term=NA' target="_blank"> NA </a>				-0.107775	-1.07757	0.645448	0.810191	Not regulated	0.88	1.07	1.19	0.97	0.92	0.95	0.86
AABR07008608.1	<a href='https://www.ncbi.nlm.nih.gov/gene/?term=NA' target="_blank"> NA </a>				-0.146861	-1.10716	0.771028	0.884022	Not regulated	1.63	2.78	6.46	6.05	2.87	2.72	5.83
AABR07008940.1	<a href='https://www.ncbi.nlm.nih.gov/gene/?term=NA' target="_blank"> NA </a>				-0.18066	-1.1334	0.294785	0.519624	Not regulated	16.05	17.11	21.29	21.58	16.67	17.96	15.75
AABR07009105.1	<a href='https://www.ncbi.nlm.nih.gov/gene/?term=NA' target="_blank"> NA </a>				-0.197743	-1.1469	0.575237	0.763499	Not regulated	4.6	4.67	4.73	6.2	2.74	3.13	4.63
AABR07009715.1	<a href='https://www.ncbi.nlm.nih.gov/gene/?term=NA' target="_blank"> NA </a>				-0.220343	-1.16501	0.282979	0.507049	Not regulated	14.63	15.11	15.94	10.17	12.04	10.85	13.08
AABR07010705.1	<a href='https://www.ncbi.nlm.nih.gov/gene/?term=NA' target="_blank"> NA </a>				-0.326702	-1.25414	0.339827	0.565584	Not regulated	3.56	3.99	2.63	2.04	2.39	2.64	2.35
AABR07011057.1	<a href='https://www.ncbi.nlm.nih.gov/gene/?term=NA' target="_blank"> NA </a>				-3.22017	-9.319	0.0623611	0.193609	Not regulated	0.59	0	0.02	0.04	0.03	0	0.02
AABR07011951.1	<a href='https://www.ncbi.nlm.nih.gov/gene/?term=NA' target="_blank"> NA </a>				0.162516	1.11924	0.30415	0.528476	Not regulated	15.45	19.97	17.47	24.52	20.66	23.31	21.15
AABR07012054.1	<a href='https://www.ncbi.nlm.nih.gov/gene/?term=NA' target="_blank"> NA </a>				-0.00912876	-1.00635	0.965848	0.984782	Not regulated	6.8	7.54	7.82	7.15	7.48	6.67	7.67
AABR07012310.1	<a href='https://www.ncbi.nlm.nih.gov/gene/?term=NA' target="_blank"> NA </a>				-0.353655	-1.27779	0.0728	0.215276	Not regulated	47.55	36.47	50.35	34.07	30.62	35.59	32.98
AABR07012317.1	<a href='https://www.ncbi.nlm.nih.gov/gene/?term=NA' target="_blank"> NA </a>				-0.47686	-1.39171	0.313048	0.537704	Not regulated	7.19	10.81	9.9	8.84	2.81	10.5	6.97
AABR07012329.1	<a href='https://www.ncbi.nlm.nih.gov/gene/?term=NA' target="_blank"> NA </a>				-1.5927	-3.01613	0.0315229	0.121329	Not regulated	3.25	1.62	2.69	2.79	0	1.4	1.24
AABR07012795.1	<a href='https://www.ncbi.nlm.nih.gov/gene/?term=NA' target="_blank"> NA </a>				0.342855	1.26826	0.00160997	0.0130705	Not regulated	37.03	43.65	44.64	44.84	55.65	51.63	54.73
AABR07013255.1	<a href='https://www.ncbi.nlm.nih.gov/gene/?term=NA' target="_blank"> NA </a>				0.79369	1.7335	0.0444189	0.154346	Not regulated	0.39	0.34	0.39	0.43	0.46	0.98	0.59
AABR07014550.1	<a href='https://www.ncbi.nlm.nih.gov/gene/?term=NA' target="_blank"> NA </a>				-0.00576442	-1.004	0.985155	0.99277	Not regulated	22.35	21.17	10.91	20.97	21.29	13.02	21.62
AABR07014804.1	<a href='https://www.ncbi.nlm.nih.gov/gene/?term=NA' target="_blank"> NA </a>				0.735672	1.66517	0.0915143	0.249786	Not regulated	1.11	1.24	2.31	1.39	1.84	3.23	2.62
AABR07015294.1	<a href='https://www.ncbi.nlm.nih.gov/gene/?term=NA' target="_blank"> NA </a>				0.23869	1.17992	0.413002	0.632949	Not regulated	4.73	4.35	3.5	3.2	4.53	5.37	4.07
AABR07015346.1	<a href='https://www.ncbi.nlm.nih.gov/gene/?term=NA' target="_blank"> NA </a>				-0.235872	-1.17762	0.151681	0.34521	Not regulated	39.96	34.89	37.44	44.37	29.66	37.29	33.19
AABR07015507.1	<a href='https://www.ncbi.nlm.nih.gov/gene/?term=NA' target="_blank"> NA </a>				0.0461531	1.03251	0.551808	0.747778	Not regulated	60.17	64.63	60.43	61.61	62.8	63.9	64.6
AABR07015719.1	<a href='https://www.ncbi.nlm.nih.gov/gene/?term=NA' target="_blank"> NA </a>				-0.618792	-1.53559	0.0378845	0.138092	Not regulated	4.65	4.41	4.7	4.39	2.33	2.69	3.79
AABR07017110.1	<a href='https://www.ncbi.nlm.nih.gov/gene/?term=NA' target="_blank"> NA </a>				0.051493	1.03634	0.825933	0.917105	Not regulated	4.25	4.2	3.8	5.59	5.23	3.84	4.79
AABR07017250.1	<a href='https://www.ncbi.nlm.nih.gov/gene/?term=NA' target="_blank"> NA </a>				0.183632	1.13574	0.861833	0.936675	Not regulated	12.43	1.04	13.42	7.83	11.3	1.32	17.01
AABR07017902.1	<a href='https://www.ncbi.nlm.nih.gov/gene/?term=NA' target="_blank"> NA </a>				0.23335	1.17556	0.612571	0.789781	Not regulated	2.17	1.35	1.37	0.93	1.23	1.76	2.12
AABR07018038.3	<a href='https://www.ncbi.nlm.nih.gov/gene/?term=NA' target="_blank"> NA </a>				-0.0225449	-1.01575	0.830016	0.919412	Not regulated	34.38	43.01	42.39	37.57	38.32	41.54	37.07
AABR07018244.2	<a href='https://www.ncbi.nlm.nih.gov/gene/?term=NA' target="_blank"> NA </a>				0.148044	1.10807	0.496154	0.704816	Not regulated	13.46	17.46	11.28	12.12	13.28	16.4	15.76
AABR07018323.1	<a href='https://www.ncbi.nlm.nih.gov/gene/?term=NA' target="_blank"> NA </a>				0.37749	1.29908	0.340418	0.566285	Not regulated	0.72	0.97	1.63	1.37	1.5	1.44	1.66
AABR07019209.2	<a href='https://www.ncbi.nlm.nih.gov/gene/?term=NA' target="_blank"> NA </a>				0.0342881	1.02405	0.66985	0.824081	Not regulated	36.04	35.28	37.18	38.5	38.52	39.44	35.18
AABR07019383.1	<a href='https://www.ncbi.nlm.nih.gov/gene/?term=NA' target="_blank"> NA </a>				-0.970918	-1.96009	5.63586e-07	1.86897e-05	Down in F_UVB_WT_MG	82.47	102.71	122.93	61.46	46.87	46.22	48.48
AABR07019403.1	<a href='https://www.ncbi.nlm.nih.gov/gene/?term=NA' target="_blank"> NA </a>				0.187592	1.13886	0.513507	0.718823	Not regulated	0.41	0.32	0.28	0.27	0.32	0.39	0.39
AABR07020987.1	<a href='https://www.ncbi.nlm.nih.gov/gene/?term=NA' target="_blank"> NA </a>				-0.538573	-1.45254	0.0175609	0.0798922	Not regulated	5.68	5.93	7.3	5.94	5.52	3.8	3.59
AABR07021402.1	<a href='https://www.ncbi.nlm.nih.gov/gene/?term=NA' target="_blank"> NA </a>				-0.0157607	-1.01098	0.972389	0.987809	Not regulated	2.24	1.1	0.64	0.86	1.12	1.29	1.17
AABR07021465.1	<a href='https://www.ncbi.nlm.nih.gov/gene/?term=NA' target="_blank"> NA </a>				0.133636	1.09705	0.61142	0.788988	Not regulated	13.43	13.76	11.53	9.93	21.12	8.86	10.39
AABR07021544.1	<a href='https://www.ncbi.nlm.nih.gov/gene/?term=NA' target="_blank"> NA </a>				0.254471	1.1929	0.0445224	0.154464	Not regulated	9.33	7.49	9.98	8.77	10.09	11.14	10.66
AABR07021871.1	<a href='https://www.ncbi.nlm.nih.gov/gene/?term=NA' target="_blank"> NA </a>				0.132775	1.0964	0.53903	0.737983	Not regulated	7.78	7.32	8.92	8.03	10.29	8.95	7.15
AABR07021955.1	<a href='https://www.ncbi.nlm.nih.gov/gene/?term=NA' target="_blank"> NA </a>				0.132794	1.09642	0.241852	0.462621	Not regulated	39.97	50.28	42.25	50.09	55.19	46.87	47.77
AABR07021988.1	<a href='https://www.ncbi.nlm.nih.gov/gene/?term=NA' target="_blank"> NA </a>				0.146586	1.10695	0.0177638	0.0806771	Not regulated	32.94	34.11	31.3	33.33	38.28	36.36	36.05
AABR07022144.1	<a href='https://www.ncbi.nlm.nih.gov/gene/?term=NA' target="_blank"> NA </a>				-0.298239	-1.22964	0.273641	0.497457	Not regulated	6.98	12.08	7.6	10.14	9.93	5.35	7.06
AABR07025140.1	<a href='https://www.ncbi.nlm.nih.gov/gene/?term=NA' target="_blank"> NA </a>				-0.665186	-1.58577	0.0154169	0.0726742	Not regulated	2.12	2.21	1.95	0.99	1.08	1.13	1.24
AABR07025272.1	<a href='https://www.ncbi.nlm.nih.gov/gene/?term=NA' target="_blank"> NA </a>				-1.22204	-2.33277	8.21673e-07	2.59539e-05	Down in F_UVB_WT_MG	1.06	0.94	0.84	0.76	0.39	0.41	0.36
AABR07025295.1	<a href='https://www.ncbi.nlm.nih.gov/gene/?term=NA' target="_blank"> NA </a>				-0.0272818	-1.01909	0.800421	0.901728	Not regulated	19	19.01	20.41	20.61	15.99	21.09	21.66
AABR07026002.1	<a href='https://www.ncbi.nlm.nih.gov/gene/?term=NA' target="_blank"> NA </a>				-0.114597	-1.08267	0.622672	0.796642	Not regulated	4.14	4.32	4.9	2.87	3.01	3.66	4.31
AABR07026032.1	<a href='https://www.ncbi.nlm.nih.gov/gene/?term=NA' target="_blank"> NA </a>				-0.491584	-1.40599	0.158845	0.354987	Not regulated	2.77	2.65	1.82	5.97	1.77	2.87	2.44
AABR07026058.1	<a href='https://www.ncbi.nlm.nih.gov/gene/?term=NA' target="_blank"> NA </a>				0.143076	1.10426	0.655922	0.815903	Not regulated	1.74	1.48	2.27	2.2	2.32	2.54	1.65
AABR07026112.1	<a href='https://www.ncbi.nlm.nih.gov/gene/?term=NA' target="_blank"> NA </a>				0.215388	1.16102	0.219501	0.436051	Not regulated	7.96	7.32	6.75	5.4	7.02	8.31	8.74
AABR07026291.1	<a href='https://www.ncbi.nlm.nih.gov/gene/?term=NA' target="_blank"> NA </a>				-0.0427246	-1.03006	0.686863	0.835346	Not regulated	15.16	19.7	18.39	17.08	16.8	16.51	18.31
AABR07026311.1	<a href='https://www.ncbi.nlm.nih.gov/gene/?term=NA' target="_blank"> NA </a>				0.0558404	1.03946	0.893184	0.950439	Not regulated	1.66	1.53	1.21	1.72	2.04	1.17	1.55
AABR07026317.1	<a href='https://www.ncbi.nlm.nih.gov/gene/?term=NA' target="_blank"> NA </a>				0.296027	1.22776	0.0610677	0.190987	Not regulated	13.61	13.55	15.14	12.35	17.36	15.94	16.86
AABR07026424.1	<a href='https://www.ncbi.nlm.nih.gov/gene/?term=NA' target="_blank"> NA </a>				-0.07836	-1.05582	0.825112	0.916423	Not regulated	15.54	12.14	8.02	9	12.3	8.18	11.14
AABR07026536.1	<a href='https://www.ncbi.nlm.nih.gov/gene/?term=NA' target="_blank"> NA </a>				0.141282	1.10288	0.348739	0.573728	Not regulated	7.71	9.99	8.15	10.39	9.9	10.14	9.61
AABR07026654.1	<a href='https://www.ncbi.nlm.nih.gov/gene/?term=NA' target="_blank"> NA </a>				0.0693311	1.04923	0.808186	0.905409	Not regulated	1.41	0.95	1.04	1.39	1.1	1.37	1.31
AABR07026797.1	<a href='https://www.ncbi.nlm.nih.gov/gene/?term=NA' target="_blank"> NA </a>				0.901893	1.86852	0.0993314	0.26288	Not regulated	2.56	7.09	7.94	7.71	6.73	7.69	21.32
AABR07027306.1	<a href='https://www.ncbi.nlm.nih.gov/gene/?term=NA' target="_blank"> NA </a>				-0.582617	-1.49756	0.0818013	0.23189	Not regulated	1.14	1.36	1.82	0.93	0.62	1.03	0.83
AABR07027322.1	<a href='https://www.ncbi.nlm.nih.gov/gene/?term=NA' target="_blank"> NA </a>				-0.0674597	-1.04787	0.744448	0.868392	Not regulated	45.73	37.88	37.91	41.72	50.57	37.07	28.54
AABR07028009.1	<a href='https://www.ncbi.nlm.nih.gov/gene/?term=NA' target="_blank"> NA </a>				0.543925	1.45793	0.0743872	0.217838	Not regulated	6.4	3.03	5.23	4.87	8.64	5.87	6.7
AABR07028027.1	<a href='https://www.ncbi.nlm.nih.gov/gene/?term=NA' target="_blank"> NA </a>				-0.119989	-1.08673	0.428698	0.647788	Not regulated	9.85	9.86	9.96	11.45	9.23	9.05	10.07
AABR07028137.2	<a href='https://www.ncbi.nlm.nih.gov/gene/?term=NA' target="_blank"> NA </a>				2.73523	6.65863	0.240772	0.461352	Not regulated	0.5	0	0	0	1.31	0.13	1.05
AABR07028349.1	<a href='https://www.ncbi.nlm.nih.gov/gene/?term=NA' target="_blank"> NA </a>				-0.0147782	-1.0103	0.948294	0.976977	Not regulated	2.12	2.22	2.31	2.9	2.11	2.2	2.77
AABR07028352.1	<a href='https://www.ncbi.nlm.nih.gov/gene/?term=NA' target="_blank"> NA </a>				0.521371	1.43532	0.0145475	0.0699324	Not regulated	1.32	1.48	1.44	1.29	1.97	2.29	1.73
AABR07028488.1	<a href='https://www.ncbi.nlm.nih.gov/gene/?term=NA' target="_blank"> NA </a>				0.0225691	1.01577	0.85281	0.932007	Not regulated	5.7	7	6.38	6.2	6.03	7.33	5.95
AABR07028615.1	<a href='https://www.ncbi.nlm.nih.gov/gene/?term=NA' target="_blank"> NA </a>				0.141392	1.10297	0.281152	0.505383	Not regulated	19.23	13.66	17.57	15.35	19.15	18.58	17.1
AABR07028769.1	<a href='https://www.ncbi.nlm.nih.gov/gene/?term=NA' target="_blank"> NA </a>				0.166878	1.12263	0.366249	0.588779	Not regulated	4.53	3.64	4.12	3.12	3.51	4.93	4.59
AABR07028902.1	<a href='https://www.ncbi.nlm.nih.gov/gene/?term=NA' target="_blank"> NA </a>				-0.0186391	-1.013	0.883137	0.947016	Not regulated	8.91	7.35	9.86	7.85	8.47	7.72	9.04
AABR07028997.1	<a href='https://www.ncbi.nlm.nih.gov/gene/?term=NA' target="_blank"> NA </a>				-0.520786	-1.43474	0.0631685	0.195323	Not regulated	6.6	9.93	6.98	7.53	7.53	4.14	4.4
AABR07028999.1	<a href='https://www.ncbi.nlm.nih.gov/gene/?term=NA' target="_blank"> NA </a>				-1.65812	-3.15605	0.000112116	0.00156608	Down in F_UVB_WT_MG	1	1.15	1.4	0.56	0.21	0.47	0.31
AABR07029195.1	<a href='https://www.ncbi.nlm.nih.gov/gene/?term=NA' target="_blank"> NA </a>				0.0636651	1.04512	0.677145	0.828079	Not regulated	26.08	24.42	32.27	25.14	28.19	29.02	27.53
AABR07029272.1	<a href='https://www.ncbi.nlm.nih.gov/gene/?term=NA' target="_blank"> NA </a>				-0.387467	-1.30809	0.336742	0.56269	Not regulated	1.05	0.64	0.74	0.42	0.28	0.71	0.64
AABR07029581.1	<a href='https://www.ncbi.nlm.nih.gov/gene/?term=NA' target="_blank"> NA </a>				-0.212069	-1.15835	0.0062495	0.037134	Not regulated	41.8	40.13	40.24	39.02	34.21	34.59	32.87
AABR07029596.1	<a href='https://www.ncbi.nlm.nih.gov/gene/?term=NA' target="_blank"> NA </a>				0.123955	1.08972	0.23743	0.456848	Not regulated	41.81	43.28	41.5	38.26	50.16	46.04	39.22
AABR07029605.1	<a href='https://www.ncbi.nlm.nih.gov/gene/?term=NA' target="_blank"> NA </a>				-0.135062	-1.09814	0.0798885	0.228072	Not regulated	9.73	9.65	9.34	9.65	9.01	8.45	8.76
AABR07029651.1	<a href='https://www.ncbi.nlm.nih.gov/gene/?term=NA' target="_blank"> NA </a>				-0.0560249	-1.0396	0.421707	0.641192	Not regulated	37.54	36.88	38.08	35.73	33.73	36.81	36.7
AABR07029661.1	<a href='https://www.ncbi.nlm.nih.gov/gene/?term=NA' target="_blank"> NA </a>				-0.0445218	-1.03134	0.840163	0.924263	Not regulated	84.72	84.95	101.54	47.62	88.4	82.84	60.8
AABR07030464.1	<a href='https://www.ncbi.nlm.nih.gov/gene/?term=NA' target="_blank"> NA </a>				-1.06597	-2.09357	0.1039	0.270214	Not regulated	2.32	1.66	1.5	3.54	0.63	0.34	2.21
AABR07030521.1	<a href='https://www.ncbi.nlm.nih.gov/gene/?term=NA' target="_blank"> NA </a>				-0.177944	-1.13127	0.23988	0.46024	Not regulated	2.06	2.81	2.47	2.45	2.15	2.53	1.85
AABR07030773.1	<a href='https://www.ncbi.nlm.nih.gov/gene/?term=NA' target="_blank"> NA </a>				0.181693	1.13421	0.758468	0.876754	Not regulated	3.32	1.06	1.27	1.88	0.93	2.51	2.95
AABR07030861.1	<a href='https://www.ncbi.nlm.nih.gov/gene/?term=NA' target="_blank"> NA </a>				0.20291	1.15102	0.0575593	0.183856	Not regulated	19.43	19.49	20.15	23.55	25.14	23.27	23.33
AABR07031193.1	<a href='https://www.ncbi.nlm.nih.gov/gene/?term=NA' target="_blank"> NA </a>				0.135886	1.09877	0.347256	0.572361	Not regulated	12.65	13.63	11.6	8.9	11.63	13.52	14.89
AABR07031480.1	<a href='https://www.ncbi.nlm.nih.gov/gene/?term=NA' target="_blank"> NA </a>				0.254823	1.19319	0.0270857	0.109015	Not regulated	10.34	11.59	9.94	12.41	13.68	13.69	13.42
AABR07031491.2	<a href='https://www.ncbi.nlm.nih.gov/gene/?term=NA' target="_blank"> NA </a>				0.159957	1.11725	0.356524	0.579663	Not regulated	17.15	16.33	16.32	11.58	13.43	18.86	19.28
AABR07031494.1	<a href='https://www.ncbi.nlm.nih.gov/gene/?term=NA' target="_blank"> NA </a>				0.0473247	1.03335	0.698201	0.842224	Not regulated	7.31	8.28	8.4	7.65	8.97	7.72	8.85
AABR07032097.1	<a href='https://www.ncbi.nlm.nih.gov/gene/?term=NA' target="_blank"> NA </a>				0.402103	1.32143	0.245258	0.466921	Not regulated	1.17	0.97	1.69	1.51	1.55	2.28	1.99
AABR07032821.1	<a href='https://www.ncbi.nlm.nih.gov/gene/?term=NA' target="_blank"> NA </a>				0.268777	1.20479	0.587398	0.772852	Not regulated	2.72	1.21	3.84	2.98	2.35	4.63	2.75
AABR07033023.1	<a href='https://www.ncbi.nlm.nih.gov/gene/?term=NA' target="_blank"> NA </a>				-0.0148443	-1.01034	0.884943	0.947649	Not regulated	8.3	8.02	7.69	7.8	7.84	7.28	8.47
AABR07033236.1	<a href='https://www.ncbi.nlm.nih.gov/gene/?term=NA' target="_blank"> NA </a>				1.23844	2.35943	0.000216433	0.00266493	Up in F_UVB_WT_MG	2.76	3.04	2.68	1.81	5.74	3.66	8.89
AABR07033570.2	<a href='https://www.ncbi.nlm.nih.gov/gene/?term=NA' target="_blank"> NA </a>				-0.24306	-1.1835	0.593476	0.776282	Not regulated	2.92	2.99	1.2	2.39	1.43	1.77	2.76
AABR07033579.3	<a href='https://www.ncbi.nlm.nih.gov/gene/?term=NA' target="_blank"> NA </a>				-0.734939	-1.66433	0.165151	0.364815	Not regulated	121.28	35.98	33.39	75.89	24.6	26.46	69.1
AABR07033590.1	<a href='https://www.ncbi.nlm.nih.gov/gene/?term=NA' target="_blank"> NA </a>				-1.03054	-2.04279	0.150564	0.343843	Not regulated	27.21	4.1	8.05	7.41	1.37	7.79	8.12
AABR07033887.1	<a href='https://www.ncbi.nlm.nih.gov/gene/?term=NA' target="_blank"> NA </a>				-0.13371	-1.09711	0.14093	0.329183	Not regulated	14.89	15.69	16.49	13.97	12.44	14.56	15.74
AABR07034315.1	<a href='https://www.ncbi.nlm.nih.gov/gene/?term=NA' target="_blank"> NA </a>				0.209657	1.15641	0.56306	0.754836	Not regulated	4.7	6.78	8.8	11.23	9.05	9.14	9.14
AABR07034438.1	<a href='https://www.ncbi.nlm.nih.gov/gene/?term=NA' target="_blank"> NA </a>				0.0170661	1.0119	0.864812	0.938338	Not regulated	13.42	15.74	14.78	14.74	15.5	13.6	15.41
AABR07034639.1	<a href='https://www.ncbi.nlm.nih.gov/gene/?term=NA' target="_blank"> NA </a>				-0.213463	-1.15947	0.52099	0.724836	Not regulated	12	10.7	10.99	7.41	8.88	5.53	11.8
AABR07034648.1	<a href='https://www.ncbi.nlm.nih.gov/gene/?term=NA' target="_blank"> NA </a>				-0.400394	-1.31987	3.53386e-05	0.000612689	Not regulated	24.11	22.59	25.29	21.63	16.32	18.57	18.43
AABR07034767.1	<a href='https://www.ncbi.nlm.nih.gov/gene/?term=NA' target="_blank"> NA </a>				0.173737	1.12798	0.29766	0.522534	Not regulated	17.02	11.43	12.23	10.93	14.98	13.48	15.21
AABR07035218.1	<a href='https://www.ncbi.nlm.nih.gov/gene/?term=NA' target="_blank"> NA </a>				0.119158	1.0861	0.124477	0.304785	Not regulated	203.01	203.46	209.29	187.7	211.39	236.68	214.42
AABR07035338.1	<a href='https://www.ncbi.nlm.nih.gov/gene/?term=NA' target="_blank"> NA </a>				0.129483	1.0939	0.220952	0.437496	Not regulated	18.28	20.72	20.09	23.23	23.18	21.97	22.43
AABR07035428.2	<a href='https://www.ncbi.nlm.nih.gov/gene/?term=NA' target="_blank"> NA </a>				-0.102163	-1.07338	0.280988	0.505285	Not regulated	10.24	9.87	9.12	9.92	8.75	9.74	8.93
AABR07035437.1	<a href='https://www.ncbi.nlm.nih.gov/gene/?term=NA' target="_blank"> NA </a>				-0.0935719	-1.06701	0.581533	0.768494	Not regulated	1.71	1.74	1.79	1.65	1.54	2.02	1.32
AABR07035470.1	<a href='https://www.ncbi.nlm.nih.gov/gene/?term=NA' target="_blank"> NA </a>				0.537792	1.45175	0.116317	0.291845	Not regulated	0.72	0.7	0.62	0.33	0.66	1.1	0.83
AABR07035539.1	<a href='https://www.ncbi.nlm.nih.gov/gene/?term=NA' target="_blank"> NA </a>				-0.216149	-1.16163	0.109764	0.280216	Not regulated	150.03	133.18	118	111.35	118.7	98.91	112.09
AABR07035776.1	<a href='https://www.ncbi.nlm.nih.gov/gene/?term=NA' target="_blank"> NA </a>				-0.684773	-1.60745	0.297603	0.522534	Not regulated	2.33	1.11	1.34	0.32	0.74	1.02	0.73
AABR07035787.1	<a href='https://www.ncbi.nlm.nih.gov/gene/?term=NA' target="_blank"> NA </a>				0.255904	1.19408	0.000990196	0.00887905	Not regulated	57.92	59.92	56.55	54.19	69.83	62	68.71
AABR07035839.1	<a href='https://www.ncbi.nlm.nih.gov/gene/?term=NA' target="_blank"> NA </a>				0.302186	1.23301	0.15192	0.345457	Not regulated	2.59	3.65	2.59	4.17	4.22	3.69	4.1
AABR07036087.1	<a href='https://www.ncbi.nlm.nih.gov/gene/?term=NA' target="_blank"> NA </a>				0.0375768	1.02639	0.918805	0.962605	Not regulated	4.15	3.56	3.51	2.95	3.8	2.18	5
AABR07036550.1	<a href='https://www.ncbi.nlm.nih.gov/gene/?term=NA' target="_blank"> NA </a>				-0.248399	-1.18789	0.584873	0.770914	Not regulated	0.51	0.36	0.23	0.38	0.6	0.24	0.33
AABR07036855.1	<a href='https://www.ncbi.nlm.nih.gov/gene/?term=NA' target="_blank"> NA </a>				-0.0172269	-1.01201	0.876689	0.94408	Not regulated	38.75	32.96	31.96	34.64	34.3	35.5	32.73
AABR07037203.1	<a href='https://www.ncbi.nlm.nih.gov/gene/?term=NA' target="_blank"> NA </a>				-0.0695726	-1.04941	0.730891	0.861114	Not regulated	5.33	5.6	6.38	7.11	4.75	6.95	5.82
AABR07037343.1	<a href='https://www.ncbi.nlm.nih.gov/gene/?term=NA' target="_blank"> NA </a>				0.0539744	1.03812	0.899147	0.953726	Not regulated	5.89	3.93	4.72	5.86	4.87	7.07	3.92
AABR07037356.1	<a href='https://www.ncbi.nlm.nih.gov/gene/?term=NA' target="_blank"> NA </a>				-0.765972	-1.70052	0.0704462	0.210326	Not regulated	0.88	3.38	3.42	3.58	1.43	1.91	1.65
AABR07037410.1	<a href='https://www.ncbi.nlm.nih.gov/gene/?term=NA' target="_blank"> NA </a>				0.0656743	1.04657	0.579751	0.76704	Not regulated	6.56	6.46	6.96	6.54	7.12	7.12	5.97
AABR07037436.1	<a href='https://www.ncbi.nlm.nih.gov/gene/?term=NA' target="_blank"> NA </a>				-0.184896	-1.13674	0.157163	0.352498	Not regulated	11.51	10.28	11.27	11.24	9.78	8.55	10.73
AABR07037451.2	<a href='https://www.ncbi.nlm.nih.gov/gene/?term=NA' target="_blank"> NA </a>				-0.179414	-1.13242	0.0741399	0.217469	Not regulated	7.9	7.34	6	6.44	6.86	7.68	6.86
AABR07037995.1	<a href='https://www.ncbi.nlm.nih.gov/gene/?term=NA' target="_blank"> NA </a>				-0.127748	-1.09259	0.463382	0.676777	Not regulated	2.46	2.31	2.38	1.94	1.88	2.42	1.98
AABR07038019.1	<a href='https://www.ncbi.nlm.nih.gov/gene/?term=NA' target="_blank"> NA </a>				0.116903	1.0844	0.511853	0.717846	Not regulated	17.16	20.33	18.48	20.68	23.35	23.52	15.59
AABR07039058.1	<a href='https://www.ncbi.nlm.nih.gov/gene/?term=NA' target="_blank"> NA </a>				0.106931	1.07693	0.662429	0.820009	Not regulated	11.1	12.35	16.56	11.76	15.46	17.44	9.07
AABR07039133.2	<a href='https://www.ncbi.nlm.nih.gov/gene/?term=NA' target="_blank"> NA </a>				0.238807	1.18002	0.502252	0.71052	Not regulated	10.21	8.5	5.62	4.38	9.04	8.06	8.34
AABR07039210.1	<a href='https://www.ncbi.nlm.nih.gov/gene/?term=NA' target="_blank"> NA </a>				0.251349	1.19032	0.330193	0.556374	Not regulated	0.89	1.42	1.22	0.94	1.11	1.62	1.29
AABR07039210.2	<a href='https://www.ncbi.nlm.nih.gov/gene/?term=NA' target="_blank"> NA </a>				-0.474215	-1.38916	0.12187	0.300173	Not regulated	0.92	1.09	1.08	0.62	0.81	0.56	0.63
AABR07039307.1	<a href='https://www.ncbi.nlm.nih.gov/gene/?term=NA' target="_blank"> NA </a>				0.10275	1.07382	0.778918	0.887807	Not regulated	1.48	0.87	0.93	0.96	0.7	1.39	1.32
AABR07039325.1	<a href='https://www.ncbi.nlm.nih.gov/gene/?term=NA' target="_blank"> NA </a>				0.149835	1.10944	0.553902	0.748632	Not regulated	12.84	10.32	10.16	10.02	12.85	7.79	15.26
AABR07039328.2	<a href='https://www.ncbi.nlm.nih.gov/gene/?term=NA' target="_blank"> NA </a>				-0.0460844	-1.03246	0.649913	0.81234	Not regulated	31.27	30.78	30.18	36.4	30.86	29.83	32.79
AABR07039336.2	<a href='https://www.ncbi.nlm.nih.gov/gene/?term=NA' target="_blank"> NA </a>				-0.231932	-1.17441	0.634258	0.803563	Not regulated	0.49	0.51	0.45	0.46	0.26	0.7	0.29
AABR07039345.1	<a href='https://www.ncbi.nlm.nih.gov/gene/?term=NA' target="_blank"> NA </a>				-0.207482	-1.15467	0.478863	0.688722	Not regulated	9.72	9.05	8.16	12.3	8.2	8.92	8.6
AABR07039446.1	<a href='https://www.ncbi.nlm.nih.gov/gene/?term=NA' target="_blank"> NA </a>				-0.213649	-1.15962	0.157127	0.352475	Not regulated	8.25	6.89	8.98	8.08	6.18	7.72	7
AABR07039446.2	<a href='https://www.ncbi.nlm.nih.gov/gene/?term=NA' target="_blank"> NA </a>				0.212185	1.15844	0.47575	0.685884	Not regulated	1.68	1.18	0.86	1.09	1.09	1.29	1.84
AABR07039648.1	<a href='https://www.ncbi.nlm.nih.gov/gene/?term=NA' target="_blank"> NA </a>				0.322271	1.2503	0.351031	0.575935	Not regulated	4.5	6.45	10.2	4.35	7.04	9.12	7.85
AABR07040412.1	<a href='https://www.ncbi.nlm.nih.gov/gene/?term=NA' target="_blank"> NA </a>				-0.177779	-1.13114	0.166735	0.367033	Not regulated	5.88	6.76	5.54	5.76	4.81	5.92	5.28
AABR07040855.1	<a href='https://www.ncbi.nlm.nih.gov/gene/?term=NA' target="_blank"> NA </a>				-0.155892	-1.11411	0.285971	0.511134	Not regulated	20.71	14.46	18.13	19.75	16.99	17.01	13.88
AABR07040864.1	<a href='https://www.ncbi.nlm.nih.gov/gene/?term=NA' target="_blank"> NA </a>				-0.00330994	-1.0023	0.977214	0.990019	Not regulated	8.83	9.88	9	9.55	9.61	9.23	9.35
AABR07040947.1	<a href='https://www.ncbi.nlm.nih.gov/gene/?term=NA' target="_blank"> NA </a>				-0.247819	-1.18741	0.223992	0.440563	Not regulated	77.97	78.28	74.29	59.27	46.25	87.5	50.33
AABR07041089.1	<a href='https://www.ncbi.nlm.nih.gov/gene/?term=NA' target="_blank"> NA </a>				-0.0220462	-1.0154	0.95494	0.979629	Not regulated	1.02	1.6	1.7	1.29	1.14	1.32	1.72
AABR07041140.1	<a href='https://www.ncbi.nlm.nih.gov/gene/?term=NA' target="_blank"> NA </a>				-0.0331116	-1.02322	0.935335	0.97125	Not regulated	1.33	1.07	2.11	1.79	1.69	1.57	1.32
AABR07043711.1	<a href='https://www.ncbi.nlm.nih.gov/gene/?term=NA' target="_blank"> NA </a>				0.299426	1.23065	0.431068	0.650015	Not regulated	2.07	1.72	1.78	1.26	2.38	2.68	2.52
AABR07043897.1	<a href='https://www.ncbi.nlm.nih.gov/gene/?term=NA' target="_blank"> NA </a>				-0.0878179	-1.06276	0.57861	0.766097	Not regulated	30.08	31.05	22.91	31.27	28.05	21.19	29.41
AABR07043951.1	<a href='https://www.ncbi.nlm.nih.gov/gene/?term=NA' target="_blank"> NA </a>				0.0739424	1.05259	0.382613	0.604784	Not regulated	16.16	16.52	15.26	16.87	18.28	16.25	16.65
AABR07044301.1	<a href='https://www.ncbi.nlm.nih.gov/gene/?term=NA' target="_blank"> NA </a>				-0.18264	-1.13496	0.417594	0.637661	Not regulated	17.27	12.67	12.31	12.12	9.57	12.53	13.87
AABR07044373.1	<a href='https://www.ncbi.nlm.nih.gov/gene/?term=NA' target="_blank"> NA </a>				0.0471049	1.03319	0.845405	0.927426	Not regulated	76.42	58.69	95.88	81.16	54.15	71.06	117.85
AABR07044375.1	<a href='https://www.ncbi.nlm.nih.gov/gene/?term=NA' target="_blank"> NA </a>				-0.580019	-1.49487	0.0668789	0.202887	Not regulated	230.68	254.01	349.27	256.52	110.74	186.4	252.58
AABR07044383.1	<a href='https://www.ncbi.nlm.nih.gov/gene/?term=NA' target="_blank"> NA </a>				-1.04164	-2.05857	0.0203073	0.0889189	Not regulated	5.77	15.31	4.09	5.83	4.78	2.67	3.77
AABR07044388.2	<a href='https://www.ncbi.nlm.nih.gov/gene/?term=NA' target="_blank"> NA </a>				0.350341	1.27486	0.0655993	0.200492	Not regulated	20.19	19.14	13.95	14.49	22.04	26.87	17.13
AABR07044389.1	<a href='https://www.ncbi.nlm.nih.gov/gene/?term=NA' target="_blank"> NA </a>				0.424496	1.3421	0.00285957	0.0204554	Not regulated	21.47	25.37	20.82	27.06	35.55	30.15	29.63
AABR07044570.2	<a href='https://www.ncbi.nlm.nih.gov/gene/?term=NA' target="_blank"> NA </a>				-0.745984	-1.67712	0.399822	0.619895	Not regulated	1.22	3.17	0.7	0.65	2.06	0.34	0.29
AABR07044583.1	<a href='https://www.ncbi.nlm.nih.gov/gene/?term=NA' target="_blank"> NA </a>				-0.774453	-1.71054	0.171699	0.373326	Not regulated	3.2	0.97	2.97	2.12	1.11	1.17	1.66
AABR07044583.2	<a href='https://www.ncbi.nlm.nih.gov/gene/?term=NA' target="_blank"> NA </a>				-1.20389	-2.3036	0.00113733	0.0098722	Down in F_UVB_WT_MG	4.84	6.11	6.7	7.71	1.86	2.5	3.88
AABR07044631.2	<a href='https://www.ncbi.nlm.nih.gov/gene/?term=NA' target="_blank"> NA </a>				0.683475	1.606	0.00133005	0.0111943	Up in F_UVB_WT_MG	3.32	4.6	3.6	2.51	5.21	6.56	5.24
AABR07044711.1	<a href='https://www.ncbi.nlm.nih.gov/gene/?term=NA' target="_blank"> NA </a>				0.710553	1.63643	2.40156e-12	3.54843e-10	Up in F_UVB_WT_MG	13.44	12.75	14.36	12.71	20.93	23.53	21.06
AABR07044759.1	<a href='https://www.ncbi.nlm.nih.gov/gene/?term=NA' target="_blank"> NA </a>				0.586843	1.50196	0.00790737	0.044256	Up in F_UVB_WT_MG	0.9	1.19	1.06	1.03	1.65	1.69	1.4
AABR07044925.1	<a href='https://www.ncbi.nlm.nih.gov/gene/?term=NA' target="_blank"> NA </a>				-0.134434	-1.09766	0.242206	0.462768	Not regulated	13.41	12.35	11.09	11.78	9.6	10.71	12.14
AABR07045058.1	<a href='https://www.ncbi.nlm.nih.gov/gene/?term=NA' target="_blank"> NA </a>				-0.0078553	-1.00546	0.975609	0.989222	Not regulated	3.53	2.59	2.6	3.73	3.15	2.79	3.35
AABR07045322.1	<a href='https://www.ncbi.nlm.nih.gov/gene/?term=NA' target="_blank"> NA </a>				-0.0530822	-1.03748	0.874576	0.943185	Not regulated	8.98	6.8	10.79	11.57	10.11	7.96	9.53
AABR07045373.1	<a href='https://www.ncbi.nlm.nih.gov/gene/?term=NA' target="_blank"> NA </a>				-0.379151	-1.30058	0.913768	0.960871	Not regulated	1.58	0.96	0	0	1.44	0	0
AABR07045431.1	<a href='https://www.ncbi.nlm.nih.gov/gene/?term=NA' target="_blank"> NA </a>				-0.0607063	-1.04298	0.759545	0.877313	Not regulated	4.63	4.44	3.75	3.14	3.54	3.95	4.01
AABR07045485.1	<a href='https://www.ncbi.nlm.nih.gov/gene/?term=NA' target="_blank"> NA </a>				-0.10132	-1.07275	0.252327	0.475342	Not regulated	63.74	79.22	78.14	77.03	67.34	72.26	69.22
AABR07046657.1	<a href='https://www.ncbi.nlm.nih.gov/gene/?term=NA' target="_blank"> NA </a>				-0.0625455	-1.04431	0.872496	0.942203	Not regulated	1.19	1.04	1.45	1.27	1.34	1.48	0.75
AABR07046707.1	<a href='https://www.ncbi.nlm.nih.gov/gene/?term=NA' target="_blank"> NA </a>				-0.118591	-1.08567	0.103185	0.268891	Not regulated	33.54	31.8	30.9	31.82	28.3	31.4	28.97
AABR07047789.1	<a href='https://www.ncbi.nlm.nih.gov/gene/?term=NA' target="_blank"> NA </a>				-0.0431275	-1.03035	0.728785	0.860372	Not regulated	5.39	6.32	4.6	6.21	5.84	5.05	5.48
AABR07048031.1	<a href='https://www.ncbi.nlm.nih.gov/gene/?term=NA' target="_blank"> NA </a>				-0.302648	-1.23341	0.0266403	0.107875	Not regulated	56.17	49.75	51.73	45.65	44.54	37.9	40.7
AABR07048271.1	<a href='https://www.ncbi.nlm.nih.gov/gene/?term=NA' target="_blank"> NA </a>				-0.752381	-1.68457	0.00432088	0.02818	Down in F_UVB_WT_MG	22.29	20.94	13.58	23.33	11.16	10.2	14.2
AABR07048280.1	<a href='https://www.ncbi.nlm.nih.gov/gene/?term=NA' target="_blank"> NA </a>				-0.642705	-1.56125	0.248613	0.471486	Not regulated	3.22	6.54	5.03	4.59	5.88	1.25	1.97
AABR07048992.1	<a href='https://www.ncbi.nlm.nih.gov/gene/?term=NA' target="_blank"> NA </a>				0.0523919	1.03698	0.882096	0.946358	Not regulated	5.47	3.28	3.21	2.31	4.03	2.12	4.85
AABR07049060.1	<a href='https://www.ncbi.nlm.nih.gov/gene/?term=NA' target="_blank"> NA </a>				-0.44414	-1.3605	0.339321	0.565047	Not regulated	0.28	0.42	0.36	0.22	0.15	0.23	0.33
AABR07049085.1	<a href='https://www.ncbi.nlm.nih.gov/gene/?term=NA' target="_blank"> NA </a>				0.281832	1.21574	0.249391	0.472369	Not regulated	1.49	1.42	1.07	0.89	1.19	1.9	1.38
AABR07049329.1	<a href='https://www.ncbi.nlm.nih.gov/gene/?term=NA' target="_blank"> NA </a>				-0.4609	-1.3764	0.0271403	0.109136	Not regulated	53.8	50.35	54.75	53.66	45.16	45.32	25.43
AABR07049499.1	<a href='https://www.ncbi.nlm.nih.gov/gene/?term=NA' target="_blank"> NA </a>				-1.05773	-2.08166	0.00159535	0.0129755	Down in F_UVB_WT_MG	3.12	4.59	3.39	2.58	1.36	2.66	0.97
AABR07049503.1	<a href='https://www.ncbi.nlm.nih.gov/gene/?term=NA' target="_blank"> NA </a>				-0.106934	-1.07694	0.601514	0.782071	Not regulated	14.44	11.99	11.17	11.19	9.78	12.51	12.55
AABR07049516.1	<a href='https://www.ncbi.nlm.nih.gov/gene/?term=NA' target="_blank"> NA </a>				-0.205927	-1.15343	0.415394	0.635304	Not regulated	23.12	19.03	19.77	17.25	20.37	15.59	15.29
AABR07050545.1	<a href='https://www.ncbi.nlm.nih.gov/gene/?term=NA' target="_blank"> NA </a>				-0.308777	-1.23866	0.0237287	0.09929	Not regulated	169.02	130.05	113.92	143.14	116.52	105.84	114.02
AABR07051376.1	<a href='https://www.ncbi.nlm.nih.gov/gene/?term=NA' target="_blank"> NA </a>				-0.306949	-1.23709	0.0266102	0.107802	Not regulated	9	7.81	7.33	6.7	5.54	6.06	7.05
AABR07051450.1	<a href='https://www.ncbi.nlm.nih.gov/gene/?term=NA' target="_blank"> NA </a>				0.146685	1.10702	0.535118	0.734855	Not regulated	13.17	17.61	14.9	13.05	16.59	22.35	9.95
AABR07051518.1	<a href='https://www.ncbi.nlm.nih.gov/gene/?term=NA' target="_blank"> NA </a>				-0.149308	-1.10904	0.740571	0.866225	Not regulated	0.46	0.58	0.26	0.38	0.23	0.48	0.43
AABR07051787.1	<a href='https://www.ncbi.nlm.nih.gov/gene/?term=NA' target="_blank"> NA </a>				-0.30753	-1.23759	0.12213	0.300757	Not regulated	3.24	3.1	3.19	3.03	2.12	2.32	3.15
AABR07052486.1	<a href='https://www.ncbi.nlm.nih.gov/gene/?term=NA' target="_blank"> NA </a>				-0.103062	-1.07405	0.515938	0.720461	Not regulated	10.3	11.31	8.52	7.58	9.43	9.66	7.91
AABR07052523.1	<a href='https://www.ncbi.nlm.nih.gov/gene/?term=NA' target="_blank"> NA </a>				0.900929	1.86727	6.89365e-07	2.24136e-05	Up in F_UVB_WT_MG	7.67	6.06	7.31	8.63	11.73	14.56	15.26
AABR07053166.1	<a href='https://www.ncbi.nlm.nih.gov/gene/?term=NA' target="_blank"> NA </a>				-3.57802	-11.9424	0.0217509	0.0935456	Not regulated	3.49	4.91	0.17	0	0.12	0.4	0
AABR07053185.1	<a href='https://www.ncbi.nlm.nih.gov/gene/?term=NA' target="_blank"> NA </a>				-0.144244	-1.10515	0.304948	0.529261	Not regulated	10.12	10.41	10.27	10.1	7.95	9.62	10.22
AABR07053472.1	<a href='https://www.ncbi.nlm.nih.gov/gene/?term=NA' target="_blank"> NA </a>				0.0744066	1.05293	0.445949	0.663559	Not regulated	26.39	27.74	26.89	26.85	25.71	29.47	30.21
AABR07053509.1	<a href='https://www.ncbi.nlm.nih.gov/gene/?term=NA' target="_blank"> NA </a>				-0.301492	-1.23242	0.473277	0.68425	Not regulated	7.88	9.8	11.12	7.22	6.92	5.16	10.08
AABR07053509.2	<a href='https://www.ncbi.nlm.nih.gov/gene/?term=NA' target="_blank"> NA </a>				-0.48132	-1.39602	0.00262301	0.0190971	Not regulated	4.26	4.86	3.89	5.87	3.65	2.93	3.55
AABR07053516.1	<a href='https://www.ncbi.nlm.nih.gov/gene/?term=NA' target="_blank"> NA </a>				-0.108015	-1.07774	0.223408	0.440006	Not regulated	42.3	46.19	42.55	47.16	43.81	39.5	41.73
AABR07053687.1	<a href='https://www.ncbi.nlm.nih.gov/gene/?term=NA' target="_blank"> NA </a>				-0.146069	-1.10655	0.216767	0.433273	Not regulated	10.19	10.76	10.71	9.94	8.9	10.71	8.73
AABR07053741.1	<a href='https://www.ncbi.nlm.nih.gov/gene/?term=NA' target="_blank"> NA </a>				0.210319	1.15694	0.0876827	0.242533	Not regulated	9.57	9.89	9.54	11.01	13.1	11.21	10.4
AABR07053749.2	<a href='https://www.ncbi.nlm.nih.gov/gene/?term=NA' target="_blank"> NA </a>				0.104928	1.07544	0.650898	0.812507	Not regulated	3.6	3.78	3.55	3.5	4.55	3.48	3.56
AABR07054000.1	<a href='https://www.ncbi.nlm.nih.gov/gene/?term=NA' target="_blank"> NA </a>				-0.555855	-1.47004	0.14818	0.340504	Not regulated	1.91	2.93	2.59	2.5	1.64	2.87	1.84
AABR07054189.1	<a href='https://www.ncbi.nlm.nih.gov/gene/?term=NA' target="_blank"> NA </a>				0.482354	1.39702	0.03313	0.125926	Not regulated	7.39	7.68	9.14	5.94	9.77	12.75	9.26
AABR07054286.1	<a href='https://www.ncbi.nlm.nih.gov/gene/?term=NA' target="_blank"> NA </a>				-0.0699738	-1.0497	0.736122	0.86452	Not regulated	1.74	1.88	1.44	2.07	1.93	1.23	1.89
AABR07054319.1	<a href='https://www.ncbi.nlm.nih.gov/gene/?term=NA' target="_blank"> NA </a>				-0.239871	-1.18089	0.380647	0.603319	Not regulated	17.21	28.22	19.86	30.72	27.33	15.31	18.06
AABR07054362.1	<a href='https://www.ncbi.nlm.nih.gov/gene/?term=NA' target="_blank"> NA </a>				-0.441226	-1.35776	0.145496	0.336255	Not regulated	12.8	10.24	11.45	7.29	7.52	7.61	8.08
AABR07054367.1	<a href='https://www.ncbi.nlm.nih.gov/gene/?term=NA' target="_blank"> NA </a>				0.0200162	1.01397	0.841085	0.924588	Not regulated	13.1	13.39	12.51	12.77	14.35	11.96	13.03
AABR07054368.1	<a href='https://www.ncbi.nlm.nih.gov/gene/?term=NA' target="_blank"> NA </a>				-0.3382	-1.26418	0.154492	0.349512	Not regulated	74.33	62.59	62.98	55.87	70.51	50.91	30.06
AABR07054370.1	<a href='https://www.ncbi.nlm.nih.gov/gene/?term=NA' target="_blank"> NA </a>				-0.0834229	-1.05953	0.169527	0.370724	Not regulated	477.16	500.24	493.05	498.24	477.65	475.95	441.63
AABR07054400.1	<a href='https://www.ncbi.nlm.nih.gov/gene/?term=NA' target="_blank"> NA </a>				0.138039	1.10041	0.279017	0.503169	Not regulated	6.11	7.23	6.75	7.39	7.87	6.78	8.06
AABR07054578.1	<a href='https://www.ncbi.nlm.nih.gov/gene/?term=NA' target="_blank"> NA </a>				0.207653	1.15481	0.691181	0.837988	Not regulated	0.43	0.24	0.62	0.2	0.32	0.31	0.65
AABR07054614.1	<a href='https://www.ncbi.nlm.nih.gov/gene/?term=NA' target="_blank"> NA </a>				-0.00320629	-1.00222	0.985888	0.993208	Not regulated	5.13	4.97	3.99	5.62	5.31	5.21	4.82
AABR07055919.1	<a href='https://www.ncbi.nlm.nih.gov/gene/?term=NA' target="_blank"> NA </a>				-0.0900819	-1.06443	0.654554	0.815006	Not regulated	2.63	2.55	2.89	2.39	2.05	2.87	2.66
AABR07057196.1	<a href='https://www.ncbi.nlm.nih.gov/gene/?term=NA' target="_blank"> NA </a>				0.575679	1.49038	0.0141694	0.068518	Not regulated	3.3	2.21	2.65	3.22	4.82	3.99	3.88
AABR07057423.1	<a href='https://www.ncbi.nlm.nih.gov/gene/?term=NA' target="_blank"> NA </a>				-0.0285286	-1.01997	0.824051	0.916042	Not regulated	21.33	20.02	22.18	22.53	23.54	18.22	21.41
AABR07057436.1	<a href='https://www.ncbi.nlm.nih.gov/gene/?term=NA' target="_blank"> NA </a>				0.410502	1.32915	0.051224	0.169837	Not regulated	38.51	27.91	35.74	51.82	62.73	47.35	43.55
AABR07058254.1	<a href='https://www.ncbi.nlm.nih.gov/gene/?term=NA' target="_blank"> NA </a>				-0.952379	-1.93506	0.194655	0.403585	Not regulated	0.91	1.34	0.69	0.2	0.21	0.79	0.25
AABR07058422.1	<a href='https://www.ncbi.nlm.nih.gov/gene/?term=NA' target="_blank"> NA </a>				-0.716274	-1.64293	0.00351122	0.024093	Down in F_UVB_WT_MG	0.85	0.9	1.02	0.8	0.45	0.57	0.61
AABR07058464.1	<a href='https://www.ncbi.nlm.nih.gov/gene/?term=NA' target="_blank"> NA </a>				-0.788007	-1.72669	5.47544e-05	0.000879376	Down in F_UVB_WT_MG	14.5	13.72	14.56	9.48	5.94	8.29	8.47
AABR07058914.1	<a href='https://www.ncbi.nlm.nih.gov/gene/?term=NA' target="_blank"> NA </a>				-0.432764	-1.34982	0.18265	0.387506	Not regulated	2.06	1.65	1.65	1.31	1.12	1.67	0.96
AABR07059041.1	<a href='https://www.ncbi.nlm.nih.gov/gene/?term=NA' target="_blank"> NA </a>				0.0681151	1.04835	0.395871	0.616173	Not regulated	24.77	26.51	24.52	28.3	27.04	27.7	27.22
AABR07059232.1	<a href='https://www.ncbi.nlm.nih.gov/gene/?term=NA' target="_blank"> NA </a>				0.0271034	1.01896	0.775685	0.88649	Not regulated	23.67	23.77	20.97	23.17	24.38	22.72	22.62
AABR07059632.3	<a href='https://www.ncbi.nlm.nih.gov/gene/?term=NA' target="_blank"> NA </a>				-0.223008	-1.16716	0.227709	0.445199	Not regulated	1.86	2.11	2.24	1.68	1.72	1.83	1.56
AABR07059663.1	<a href='https://www.ncbi.nlm.nih.gov/gene/?term=NA' target="_blank"> NA </a>				-0.666886	-1.58764	0.0207769	0.0904686	Not regulated	1.11	0.85	0.89	0.74	0.46	0.59	0.65
AABR07060610.1	<a href='https://www.ncbi.nlm.nih.gov/gene/?term=NA' target="_blank"> NA </a>				-0.439168	-1.35582	0.0545175	0.177212	Not regulated	14.99	16.01	13.73	17.62	8.86	10.32	15.41
AABR07060778.1	<a href='https://www.ncbi.nlm.nih.gov/gene/?term=NA' target="_blank"> NA </a>				0.202432	1.15064	0.0259217	0.105933	Not regulated	118.22	117.73	114.7	123.13	137.62	146.69	125.29
AABR07060833.1	<a href='https://www.ncbi.nlm.nih.gov/gene/?term=NA' target="_blank"> NA </a>				-0.0919616	-1.06582	0.794826	0.897706	Not regulated	1.34	0.81	0.86	0.99	0.54	1.02	1.26
AABR07061825.1	<a href='https://www.ncbi.nlm.nih.gov/gene/?term=NA' target="_blank"> NA </a>				-0.0366004	-1.02569	0.939787	0.972911	Not regulated	1.85	1.2	0.52	1.87	0.93	1.41	1.56
AABR07062138.2	<a href='https://www.ncbi.nlm.nih.gov/gene/?term=NA' target="_blank"> NA </a>				1.6551	3.14946	1.43105e-05	0.000283609	Up in F_UVB_WT_MG	0.58	0.51	0.68	0.53	1.39	1.73	2.29
AABR07062154.1	<a href='https://www.ncbi.nlm.nih.gov/gene/?term=NA' target="_blank"> NA </a>				-0.138558	-1.1008	0.25705	0.480159	Not regulated	16.5	14.92	14.29	17.43	14.23	14.49	14.32
AABR07062570.1	<a href='https://www.ncbi.nlm.nih.gov/gene/?term=NA' target="_blank"> NA </a>				0.105442	1.07582	0.178336	0.382505	Not regulated	35.18	38.11	36	41.29	40.11	42.46	39.17
AABR07062583.1	<a href='https://www.ncbi.nlm.nih.gov/gene/?term=NA' target="_blank"> NA </a>				0.29861	1.22996	0.29136	0.516119	Not regulated	1.29	1.25	1.42	0.81	1.02	1.72	1.75
AABR07063082.1	<a href='https://www.ncbi.nlm.nih.gov/gene/?term=NA' target="_blank"> NA </a>				0.527842	1.44177	0.157314	0.352717	Not regulated	0.93	1.14	0.77	1.23	1.67	1.52	1.24
AABR07063279.1	<a href='https://www.ncbi.nlm.nih.gov/gene/?term=NA' target="_blank"> NA </a>				0.671231	1.59243	0.0206295	0.0900036	Not regulated	2.3	2.42	2.5	1.37	2.62	3.86	3.79
AABR07063281.1	<a href='https://www.ncbi.nlm.nih.gov/gene/?term=NA' target="_blank"> NA </a>				-0.253868	-1.1924	0.063165	0.195323	Not regulated	6.42	5.88	5.91	5.61	4.73	6.06	4.27
AABR07063855.1	<a href='https://www.ncbi.nlm.nih.gov/gene/?term=NA' target="_blank"> NA </a>				0.408214	1.32704	0.210055	0.423676	Not regulated	2.3	5.59	6.14	6.9	7.59	5.6	7.61
AABR07064719.2	<a href='https://www.ncbi.nlm.nih.gov/gene/?term=NA' target="_blank"> NA </a>				-0.00799696	-1.00556	0.919086	0.962605	Not regulated	17.33	16.5	15.49	16	15.95	16.28	16.62
AABR07064804.1	<a href='https://www.ncbi.nlm.nih.gov/gene/?term=NA' target="_blank"> NA </a>				-0.23295	-1.17524	0.0430748	0.150977	Not regulated	7.6	6.75	7.45	6.61	5.45	6.49	6.23
AABR07064873.1	<a href='https://www.ncbi.nlm.nih.gov/gene/?term=NA' target="_blank"> NA </a>				-0.365624	-1.28844	0.00101777	0.00908346	Not regulated	35.77	33.35	34.23	26.85	22.94	28.31	27.9
AABR07065078.1	<a href='https://www.ncbi.nlm.nih.gov/gene/?term=NA' target="_blank"> NA </a>				0.0955971	1.06851	0.138417	0.32552	Not regulated	37.68	39.67	37.12	36.99	39.74	41.45	42.05
AABR07065406.1	<a href='https://www.ncbi.nlm.nih.gov/gene/?term=NA' target="_blank"> NA </a>				-0.114025	-1.08224	0.718031	0.854665	Not regulated	4.07	4.88	5.5	9.61	5.43	5.51	5.69
AABR07065420.1	<a href='https://www.ncbi.nlm.nih.gov/gene/?term=NA' target="_blank"> NA </a>				0.251877	1.19076	0.222371	0.43906	Not regulated	2.23	3.08	2.67	2.72	2.61	3.78	3.25
AABR07065438.1	<a href='https://www.ncbi.nlm.nih.gov/gene/?term=NA' target="_blank"> NA </a>				0.036289	1.02547	0.834395	0.921893	Not regulated	33.98	32.63	28.48	24.41	32.47	24.19	34.97
AABR07066180.1	<a href='https://www.ncbi.nlm.nih.gov/gene/?term=NA' target="_blank"> NA </a>				-0.0621289	-1.04401	0.468352	0.680747	Not regulated	33.52	31.82	35.47	36.45	33.92	34.05	30.85
AABR07066379.1	<a href='https://www.ncbi.nlm.nih.gov/gene/?term=NA' target="_blank"> NA </a>				-0.169522	-1.12469	0.758934	0.876836	Not regulated	1.87	1.44	0.3	1.24	1	0.77	1.35
AABR07066522.1	<a href='https://www.ncbi.nlm.nih.gov/gene/?term=NA' target="_blank"> NA </a>				-0.1416	-1.10313	0.0527241	0.17316	Not regulated	40.98	40.58	38.44	37.27	36.17	34.43	37.73
AABR07066529.1	<a href='https://www.ncbi.nlm.nih.gov/gene/?term=NA' target="_blank"> NA </a>				-0.261811	-1.19898	0.000224806	0.00274767	Not regulated	106.4	111.28	109.22	104.44	93.77	94.28	82.03
AABR07066700.1	<a href='https://www.ncbi.nlm.nih.gov/gene/?term=NA' target="_blank"> NA </a>				0.431911	1.34902	0.313543	0.538346	Not regulated	1.01	1.43	0.77	1.15	0.96	2.03	1.2
AABR07066818.1	<a href='https://www.ncbi.nlm.nih.gov/gene/?term=NA' target="_blank"> NA </a>				0.106867	1.07689	0.303818	0.528197	Not regulated	38.65	39.91	38.95	37.33	44.68	41.2	39.17
AABR07066944.1	<a href='https://www.ncbi.nlm.nih.gov/gene/?term=NA' target="_blank"> NA </a>				0.83239	1.78063	0.00319692	0.0224341	Up in F_UVB_WT_MG	2.47	2.51	1.87	2.43	2.9	5.54	4.09
AABR07067023.1	<a href='https://www.ncbi.nlm.nih.gov/gene/?term=NA' target="_blank"> NA </a>				0.480226	1.39496	0.287486	0.512651	Not regulated	0.24	0.1	0.07	0.16	0.19	0.16	0.24
AABR07067267.1	<a href='https://www.ncbi.nlm.nih.gov/gene/?term=NA' target="_blank"> NA </a>				0.127079	1.09208	0.265747	0.489814	Not regulated	14.37	13.27	11.8	13	14.97	12.93	15.01
AABR07068154.1	<a href='https://www.ncbi.nlm.nih.gov/gene/?term=NA' target="_blank"> NA </a>				0.0248232	1.01736	0.947579	0.976603	Not regulated	3.59	3.52	2.52	3.06	2.81	2.56	4.17
AABR07068161.1	<a href='https://www.ncbi.nlm.nih.gov/gene/?term=NA' target="_blank"> NA </a>				0.139295	1.10137	0.57413	0.762715	Not regulated	1.51	1.25	1.27	0.73	1.09	1.44	1.39
AABR07068316.1	<a href='https://www.ncbi.nlm.nih.gov/gene/?term=NA' target="_blank"> NA </a>				0.452972	1.36886	0.00212541	0.0162435	Not regulated	12.36	13.89	12.24	9.54	14.19	20	14.97
AABR07068351.1	<a href='https://www.ncbi.nlm.nih.gov/gene/?term=NA' target="_blank"> NA </a>				-0.135586	-1.09854	0.0939016	0.253756	Not regulated	28.71	29.26	27.48	24.68	24.2	26.21	25.37
AABR07068587.1	<a href='https://www.ncbi.nlm.nih.gov/gene/?term=NA' target="_blank"> NA </a>				0.188142	1.1393	0.48351	0.693082	Not regulated	17.27	14.95	16.04	17.43	16.69	18.79	20.55
AABR07068694.1	<a href='https://www.ncbi.nlm.nih.gov/gene/?term=NA' target="_blank"> NA </a>				-0.15612	-1.11429	0.383591	0.605531	Not regulated	22.91	22.5	23.58	23.27	22.49	17.38	21.78
AABR07069219.1	<a href='https://www.ncbi.nlm.nih.gov/gene/?term=NA' target="_blank"> NA </a>				0.19288	1.14304	0.0707279	0.210941	Not regulated	165.58	170.2	176.08	204.98	225.69	199.07	190.52
AABR07069454.1	<a href='https://www.ncbi.nlm.nih.gov/gene/?term=NA' target="_blank"> NA </a>				-0.112942	-1.08143	0.620343	0.795353	Not regulated	1.52	1.55	1.27	1.48	1.45	1.48	1.24
AABR07070307.1	<a href='https://www.ncbi.nlm.nih.gov/gene/?term=NA' target="_blank"> NA </a>				-0.512124	-1.42615	0.00048882	0.00513049	Down in F_UVB_WT_MG	3.7	3.97	3.14	3.38	2.06	2.7	2.73
AABR07070810.1	<a href='https://www.ncbi.nlm.nih.gov/gene/?term=NA' target="_blank"> NA </a>				4.20083	18.3898	6.95239e-08	3.32564e-06	Up in F_UVB_WT_MG	0.52	0	0.33	0	4.26	4.15	2.7
AABR07071000.1	<a href='https://www.ncbi.nlm.nih.gov/gene/?term=NA' target="_blank"> NA </a>				-0.448015	-1.36416	0.00556809	0.034135	Not regulated	22.25	20.03	21.56	16.71	16.28	13.43	14.51
AABR07071244.1	<a href='https://www.ncbi.nlm.nih.gov/gene/?term=NA' target="_blank"> NA </a>				0.0614687	1.04353	0.258174	0.481514	Not regulated	68.36	70.04	67.28	66.69	75.28	75.43	69.18
AABR07071765.1	<a href='https://www.ncbi.nlm.nih.gov/gene/?term=NA' target="_blank"> NA </a>				-0.582361	-1.4973	0.00769707	0.0433894	Down in F_UVB_WT_MG	11.36	10.29	13.33	11.75	7	11.27	5.3
AABR07071986.1	<a href='https://www.ncbi.nlm.nih.gov/gene/?term=NA' target="_blank"> NA </a>				-0.0380542	-1.02673	0.777631	0.887056	Not regulated	35.19	40.41	40.11	35.46	38.66	39.16	33.01
AABR07072096.1	<a href='https://www.ncbi.nlm.nih.gov/gene/?term=NA' target="_blank"> NA </a>				-0.92151	-1.8941	0.0896626	0.246197	Not regulated	1.39	0.95	0.81	0.79	0.34	0.3	0.66
AABR07072108.1	<a href='https://www.ncbi.nlm.nih.gov/gene/?term=NA' target="_blank"> NA </a>				0.29177	1.22414	0.235705	0.454921	Not regulated	2.27	2.01	1.85	2.49	2.57	2.76	2.57
AABR07072356.1	<a href='https://www.ncbi.nlm.nih.gov/gene/?term=NA' target="_blank"> NA </a>				-0.044883	-1.0316	0.556739	0.751321	Not regulated	77.89	81.18	77.72	79.84	78.23	76.58	75.54
AABR07072371.1	<a href='https://www.ncbi.nlm.nih.gov/gene/?term=NA' target="_blank"> NA </a>				-0.235168	-1.17704	0.440981	0.659915	Not regulated	1.5	1.59	1.63	1.66	1.61	1.24	1.16
AABR07072400.1	<a href='https://www.ncbi.nlm.nih.gov/gene/?term=NA' target="_blank"> NA </a>				0.13841	1.10069	0.65663	0.816139	Not regulated	8.95	7.82	12.07	9.33	9.12	12.77	9.52
AABR07072440.1	<a href='https://www.ncbi.nlm.nih.gov/gene/?term=NA' target="_blank"> NA </a>				0.150713	1.11012	0.660063	0.81831	Not regulated	4.37	2.52	4.49	2.89	3.75	4.34	3.74
AABR07072539.4	<a href='https://www.ncbi.nlm.nih.gov/gene/?term=NA' target="_blank"> NA </a>				-0.0768078	-1.05468	0.538471	0.737825	Not regulated	65.65	63.95	66.82	49.82	61.45	55.09	58.66
AABR07072759.1	<a href='https://www.ncbi.nlm.nih.gov/gene/?term=NA' target="_blank"> NA </a>				-0.696161	-1.62019	0.0975693	0.259963	Not regulated	85.7	78.14	98.53	40.69	32.85	72.14	36.12
AABR07073038.1	<a href='https://www.ncbi.nlm.nih.gov/gene/?term=NA' target="_blank"> NA </a>				0.104694	1.07527	0.159061	0.355256	Not regulated	123.62	133.59	134.47	143.83	144.98	150.4	137.31
AABR07073039.1	<a href='https://www.ncbi.nlm.nih.gov/gene/?term=NA' target="_blank"> NA </a>				0.10179	1.0731	0.282771	0.506845	Not regulated	301.53	289.68	290.26	244.61	295.61	285.61	325.45
AABR07073134.1	<a href='https://www.ncbi.nlm.nih.gov/gene/?term=NA' target="_blank"> NA </a>				0.11654	1.08413	0.500425	0.708831	Not regulated	28.68	31.46	37.33	25.84	33.67	39.93	27.04
AABR07073181.1	<a href='https://www.ncbi.nlm.nih.gov/gene/?term=NA' target="_blank"> NA </a>				0.199679	1.14844	0.00752284	0.0426969	Not regulated	26.83	26.56	23.23	23.71	29.33	28.02	29.14
Aacs	<a href='https://www.ncbi.nlm.nih.gov/gene/?term=65984' target="_blank"> 65984 </a>	acetoacetyl-CoA synthetase	protein_coding	protein_coding	0.710254	1.63609	5.30092e-06	0.000127979	Up in F_UVB_WT_MG	46.15	52.82	51.9	66.07	88.37	72.49	105.51
Aadac	<a href='https://www.ncbi.nlm.nih.gov/gene/?term=57300' target="_blank"> 57300 </a>	arylacetamide deacetylase	protein_coding	protein_coding	0.278026	1.21253	0.03438	0.129075	Not regulated	531.1	594.61	568.58	663.31	708	859.28	582.66
Aadacl3	<a href='https://www.ncbi.nlm.nih.gov/gene/?term=313686' target="_blank"> 313686 </a>	arylacetamide deacetylase-like 3	protein_coding	protein_coding	0.0343397	1.02409	0.803965	0.903217	Not regulated	101.13	136.99	117.29	144.16	144.2	123.53	114.75
Aadacl4	<a href='https://www.ncbi.nlm.nih.gov/gene/?term=313688' target="_blank"> 313688 </a>	arylacetamide deacetylase-like 4	protein_coding	protein_coding	-0.133702	-1.09711	0.468923	0.681129	Not regulated	96.29	86.8	85.73	78.5	73.08	57.33	107.03
Aagab	<a href='https://www.ncbi.nlm.nih.gov/gene/?term=171435' target="_blank"> 171435 </a>	alpha- and gamma-adaptin binding protein	protein_coding	protein_coding	-0.221059	-1.16559	0.00942833	0.0505568	Not regulated	107.88	121.54	114.09	123.56	108.14	94.77	98.06
Aak1	<a href='https://www.ncbi.nlm.nih.gov/gene/?term=500244' target="_blank"> 500244 </a>	AP2 associated kinase 1	protein_coding	protein_coding	-0.0319684	-1.02241	0.670476	0.824081	Not regulated	17	17.91	17.65	19.04	18.52	16.52	16.72
Aamdc	<a href='https://www.ncbi.nlm.nih.gov/gene/?term=361606' target="_blank"> 361606 </a>	adipogenesis associated, Mth938 domain containing	protein_coding	protein_coding	-0.0829649	-1.05919	0.749202	0.871297	Not regulated	8.99	9.78	8.5	8.98	10.61	12.15	6.55
Aamp	<a href='https://www.ncbi.nlm.nih.gov/gene/?term=301512' target="_blank"> 301512 </a>	angio-associated, migratory cell protein	protein_coding	protein_coding	0.0752597	1.05355	0.385392	0.607149	Not regulated	110.43	107.05	102.44	106.07	122.9	102.3	111.4
Aar2	<a href='https://www.ncbi.nlm.nih.gov/gene/?term=296312' target="_blank"> 296312 </a>	AAR2 splicing factor	protein_coding	protein_coding	0.0048085	1.00334	0.962112	0.982461	Not regulated	26.6	27.49	27.16	32.19	30.37	28.44	26.67
Aars	<a href='https://www.ncbi.nlm.nih.gov/gene/?term=NA' target="_blank"> NA </a>		protein_coding	protein_coding	-0.0528938	-1.03734	0.506435	0.713978	Not regulated	115.47	123.91	122.1	137.16	123.82	121.05	116.21
Aars2	<a href='https://www.ncbi.nlm.nih.gov/gene/?term=301254' target="_blank"> 301254 </a>	alanyl-tRNA synthetase 2, mitochondrial	protein_coding	protein_coding	0.134916	1.09803	0.14718	0.339314	Not regulated	12.01	12.57	10.93	12.07	12.94	14.17	12.2
Aarsd1	<a href='https://www.ncbi.nlm.nih.gov/gene/?term=619440' target="_blank"> 619440 </a>	alanyl-tRNA synthetase domain containing 1	protein_coding	protein_coding	0.0357167	1.02507	0.705409	0.846448	Not regulated	16.18	16.04	15.52	18.4	16.56	17.8	16.58
Aasdh	<a href='https://www.ncbi.nlm.nih.gov/gene/?term=364136' target="_blank"> 364136 </a>	aminoadipate-semialdehyde dehydrogenase	protein_coding	protein_coding	-0.17329	-1.12763	0.185727	0.392036	Not regulated	5.67	6.39	5.38	4.89	5.17	4.81	4.88
Aasdhppt	<a href='https://www.ncbi.nlm.nih.gov/gene/?term=300328' target="_blank"> 300328 </a>	aminoadipate-semialdehyde dehydrogenase-phosphopantetheinyl transferase	protein_coding	protein_coding	0.0758702	1.054	0.377513	0.599638	Not regulated	38.95	38.6	35.53	39.06	41.7	37.28	41.24
Aatf	<a href='https://www.ncbi.nlm.nih.gov/gene/?term=114512' target="_blank"> 114512 </a>	apoptosis antagonizing transcription factor	protein_coding	protein_coding	0.0856395	1.06116	0.432968	0.651756	Not regulated	14.63	13.86	12.6	13.11	14.5	15.05	13.72
Aatk	<a href='https://www.ncbi.nlm.nih.gov/gene/?term=690853' target="_blank"> 690853 </a>	apoptosis-associated tyrosine kinase	protein_coding	protein_coding	-0.434241	-1.3512	0.0468203	0.159575	Not regulated	1.56	1.61	1.86	1.56	0.92	1.41	1.35
Abca1	<a href='https://www.ncbi.nlm.nih.gov/gene/?term=313210' target="_blank"> 313210 </a>	ATP binding cassette subfamily A member 1	protein_coding	protein_coding	-0.731406	-1.66026	7.02665e-09	4.58041e-07	Down in F_UVB_WT_MG	50.16	50.06	37.55	48.71	24.03	29.02	31.35
Abca12	<a href='https://www.ncbi.nlm.nih.gov/gene/?term=301482' target="_blank"> 301482 </a>	ATP binding cassette subfamily A member 12	protein_coding	protein_coding	0.23689	1.17845	0.241177	0.461891	Not regulated	7.85	6.5	8.51	8.83	6.9	8.35	12.84
Abca2	<a href='https://www.ncbi.nlm.nih.gov/gene/?term=79248' target="_blank"> 79248 </a>	ATP binding cassette subfamily A member 2	protein_coding	protein_coding	-0.239108	-1.18026	0.000816712	0.00764296	Not regulated	36.44	36.87	35.1	34.81	32.42	28.88	29.74
Abca3	<a href='https://www.ncbi.nlm.nih.gov/gene/?term=302973' target="_blank"> 302973 </a>	ATP binding cassette subfamily A member 3	protein_coding	protein_coding	0.305195	1.23559	0.0122328	0.0614296	Not regulated	50.03	46.58	35.51	51.91	60.15	52.77	56.1
Abca5	<a href='https://www.ncbi.nlm.nih.gov/gene/?term=286970' target="_blank"> 286970 </a>	ATP binding cassette subfamily A member 5	protein_coding	protein_coding	-0.99507	-1.99318	0.118982	0.295752	Not regulated	0.15	0.61	0.13	0.62	0.16	0.18	0.23
Abca7	<a href='https://www.ncbi.nlm.nih.gov/gene/?term=299609' target="_blank"> 299609 </a>	ATP binding cassette subfamily A member 7	protein_coding	protein_coding	0.29887	1.23018	0.00396591	0.0264354	Not regulated	4.93	5.68	5.46	6.17	6.59	6.85	7.13
Abca8	<a href='https://www.ncbi.nlm.nih.gov/gene/?term=303637' target="_blank"> 303637 </a>	ATP binding cassette subfamily A member 8	protein_coding	protein_coding	-0.811357	-1.75486	0.0730918	0.215659	Not regulated	0.76	0.48	0.74	0.27	0.27	0.48	0.24
Abca8a	<a href='https://www.ncbi.nlm.nih.gov/gene/?term=303638' target="_blank"> 303638 </a>	ATP-binding cassette, subfamily A (ABC1), member 8a	protein_coding	protein_coding	-0.420196	-1.33811	0.00231277	0.0173171	Not regulated	10.26	10.81	9.43	9.25	5.95	9.17	7.3
Abca9	<a href='https://www.ncbi.nlm.nih.gov/gene/?term=287788' target="_blank"> 287788 </a>	ATP binding cassette subfamily A member 9	protein_coding	protein_coding	-0.0538058	-1.038	0.829751	0.919196	Not regulated	0.65	0.69	0.61	0.46	0.45	0.61	0.7
Abcb10	<a href='https://www.ncbi.nlm.nih.gov/gene/?term=361439' target="_blank"> 361439 </a>	ATP binding cassette subfamily B member 10	protein_coding	protein_coding	0.274423	1.20951	0.00427664	0.0279463	Not regulated	28.67	24.77	26.42	27	34.91	30.35	31.68
Abcb4	<a href='https://www.ncbi.nlm.nih.gov/gene/?term=24891' target="_blank"> 24891 </a>	ATP binding cassette subfamily B member 4	protein_coding	protein_coding	-0.100318	-1.07201	0.738039	0.865013	Not regulated	2.59	1.53	1.54	1.12	1.48	1.55	1.57
Abcb6	<a href='https://www.ncbi.nlm.nih.gov/gene/?term=140669' target="_blank"> 140669 </a>	ATP binding cassette subfamily B member 6	protein_coding	protein_coding	0.192341	1.14262	0.0410252	0.145909	Not regulated	49.63	52.83	51.72	59.52	65.49	58.46	59.38
Abcb7	<a href='https://www.ncbi.nlm.nih.gov/gene/?term=302395' target="_blank"> 302395 </a>	ATP binding cassette subfamily B member 7	protein_coding	protein_coding	0.0907028	1.06489	0.33506	0.561303	Not regulated	16.68	17.75	18.99	19.03	19.65	19.58	18.73
Abcb8	<a href='https://www.ncbi.nlm.nih.gov/gene/?term=362302' target="_blank"> 362302 </a>	ATP binding cassette subfamily B member 8	protein_coding	protein_coding	0.182342	1.13472	0.0192357	0.0856078	Not regulated	31.68	34.09	32.7	34.32	38.62	39.54	34.83
Abcb9	<a href='https://www.ncbi.nlm.nih.gov/gene/?term=63886' target="_blank"> 63886 </a>	ATP binding cassette subfamily B member 9	protein_coding	protein_coding	0.591077	1.50637	0.00060026	0.00601526	Up in F_UVB_WT_MG	25.74	30.93	24.61	32.04	51.78	44.89	31.22
Abcc1	<a href='https://www.ncbi.nlm.nih.gov/gene/?term=24565' target="_blank"> 24565 </a>	ATP binding cassette subfamily C member 1	protein_coding	protein_coding	-0.288975	-1.22177	0.000724042	0.00690201	Not regulated	58.17	65.65	55.35	61.31	52.19	45.72	49.54
Abcc10	<a href='https://www.ncbi.nlm.nih.gov/gene/?term=316231' target="_blank"> 316231 </a>	ATP binding cassette subfamily C member 10	protein_coding	protein_coding	0.141109	1.10275	0.144075	0.33413	Not regulated	7.4	7.76	7.61	6.88	8.46	8.52	7.59
Abcc3	<a href='https://www.ncbi.nlm.nih.gov/gene/?term=140668' target="_blank"> 140668 </a>	ATP binding cassette subfamily C member 3	protein_coding	protein_coding	-0.0592504	-1.04192	0.600934	0.781538	Not regulated	3.96	4.15	4.17	4.01	3.64	3.91	4.21
Abcc4	<a href='https://www.ncbi.nlm.nih.gov/gene/?term=170924' target="_blank"> 170924 </a>	ATP binding cassette subfamily C member 4	protein_coding	protein_coding	0.172846	1.12728	0.0170976	0.0784825	Not regulated	148.99	139.27	131.25	150.37	163.95	160.85	158.07
Abcc5	<a href='https://www.ncbi.nlm.nih.gov/gene/?term=116721' target="_blank"> 116721 </a>	ATP binding cassette subfamily C member 5	protein_coding	protein_coding	0.596772	1.51233	0.00172037	0.0137568	Up in F_UVB_WT_MG	4	4.63	4.27	3.85	4.37	6.18	8.08
Abcc6	<a href='https://www.ncbi.nlm.nih.gov/gene/?term=81642' target="_blank"> 81642 </a>	ATP binding cassette subfamily C member 6	protein_coding	protein_coding	-0.421596	-1.33941	0.38857	0.609988	Not regulated	0.3	0.31	0.33	0.12	0.2	0.14	0.25
Abcc9	<a href='https://www.ncbi.nlm.nih.gov/gene/?term=25560' target="_blank"> 25560 </a>	ATP binding cassette subfamily C member 9	protein_coding	protein_coding	0.312004	1.24143	0.154873	0.349854	Not regulated	3.91	5.24	4.42	3.76	4.11	7.75	4.37
Abcd1	<a href='https://www.ncbi.nlm.nih.gov/gene/?term=363516' target="_blank"> 363516 </a>	ATP binding cassette subfamily D member 1	protein_coding	protein_coding	-0.246204	-1.18608	0.142527	0.331743	Not regulated	4.75	4.01	3.37	3.66	3.3	3.52	3.19
Abcd2	<a href='https://www.ncbi.nlm.nih.gov/gene/?term=84356' target="_blank"> 84356 </a>	ATP binding cassette subfamily D member 2	protein_coding	protein_coding	-0.714489	-1.6409	0.0644334	0.198127	Not regulated	0.25	0.37	0.34	0.37	0.2	0.2	0.2
Abcd3	<a href='https://www.ncbi.nlm.nih.gov/gene/?term=25270' target="_blank"> 25270 </a>	ATP binding cassette subfamily D member 3	protein_coding	protein_coding	0.124751	1.09032	0.46742	0.680177	Not regulated	314.24	392.32	306.77	471.79	484.59	339.17	388.75
Abcd4	<a href='https://www.ncbi.nlm.nih.gov/gene/?term=299196' target="_blank"> 299196 </a>	ATP binding cassette subfamily D member 4	protein_coding	protein_coding	0.325776	1.25334	0.0332339	0.126198	Not regulated	5.44	5.11	4.56	4.78	6.17	5.99	5.66
Abce1	<a href='https://www.ncbi.nlm.nih.gov/gene/?term=361390' target="_blank"> 361390 </a>	ATP binding cassette subfamily E member 1	protein_coding	protein_coding	0.238471	1.17974	0.0039872	0.026564	Not regulated	40.93	48.03	42.65	47.96	50.94	51.04	55.47
Abcf1	<a href='https://www.ncbi.nlm.nih.gov/gene/?term=85493' target="_blank"> 85493 </a>	ATP binding cassette subfamily F member 1	protein_coding	protein_coding	-0.0154511	-1.01077	0.852505	0.931845	Not regulated	65.74	68.82	65.43	76.67	64.32	70.05	71.22
Abcf2	<a href='https://www.ncbi.nlm.nih.gov/gene/?term=311959' target="_blank"> 311959 </a>	ATP binding cassette subfamily F member 2	protein_coding	protein_coding	0.0949546	1.06803	0.299056	0.52382	Not regulated	67.2	67.66	61.18	71.26	76.51	65.49	72.03
Abcf3	<a href='https://www.ncbi.nlm.nih.gov/gene/?term=287982' target="_blank"> 287982 </a>	ATP binding cassette subfamily F member 3	protein_coding	protein_coding	0.0679648	1.04824	0.369357	0.591843	Not regulated	37.06	37.54	37.97	37.36	41.3	40.24	36.76
Abcg1	<a href='https://www.ncbi.nlm.nih.gov/gene/?term=85264' target="_blank"> 85264 </a>	ATP binding cassette subfamily G member 1	protein_coding	protein_coding	0.0488371	1.03443	0.604386	0.784033	Not regulated	140.68	167.04	152.64	156.38	175.43	138.12	159.89
Abcg2	<a href='https://www.ncbi.nlm.nih.gov/gene/?term=312382' target="_blank"> 312382 </a>	ATP binding cassette subfamily G member 2	protein_coding	protein_coding	-0.282821	-1.21657	0.4489	0.665272	Not regulated	2.84	3.6	1.9	1.84	2.1	1.14	3
Abcg4	<a href='https://www.ncbi.nlm.nih.gov/gene/?term=300664' target="_blank"> 300664 </a>	ATP binding cassette subfamily G member 4	protein_coding	protein_coding	-0.0105591	-1.00735	0.931466	0.969364	Not regulated	5.48	6.39	6.91	6.34	5.91	6.18	6.65
Abhd1	<a href='https://www.ncbi.nlm.nih.gov/gene/?term=313917' target="_blank"> 313917 </a>	abhydrolase domain containing 1	protein_coding	protein_coding	0.622243	1.53927	3.47478e-05	0.000605605	Up in F_UVB_WT_MG	8.85	8.04	8.21	7.84	11.31	14.61	12.26
Abhd10	<a href='https://www.ncbi.nlm.nih.gov/gene/?term=303953' target="_blank"> 303953 </a>	abhydrolase domain containing 10, depalmitoylase	protein_coding	protein_coding	0.0684216	1.04857	0.692219	0.838652	Not regulated	6.25	5.26	6.42	5.98	6.66	6.16	5.96
Abhd11	<a href='https://www.ncbi.nlm.nih.gov/gene/?term=360831' target="_blank"> 360831 </a>	abhydrolase domain containing 11	protein_coding	protein_coding	0.698045	1.6223	1.95603e-08	1.15094e-06	Up in F_UVB_WT_MG	16.34	19.39	17.26	17.97	28.35	26.55	32.34
Abhd12	<a href='https://www.ncbi.nlm.nih.gov/gene/?term=499913' target="_blank"> 499913 </a>	abhydrolase domain containing 12, lysophospholipase	protein_coding	protein_coding	-0.150421	-1.10989	0.278655	0.502857	Not regulated	31.75	31.8	31.22	26.53	21.53	29.84	31
Abhd12b	<a href='https://www.ncbi.nlm.nih.gov/gene/?term=408202' target="_blank"> 408202 </a>	abhydrolase domain containing 12B	protein_coding	protein_coding	-0.439758	-1.35638	0.103667	0.269865	Not regulated	7.83	6.78	7.98	5.53	4.23	7.49	4.06
Abhd13	<a href='https://www.ncbi.nlm.nih.gov/gene/?term=306630' target="_blank"> 306630 </a>	abhydrolase domain containing 13	protein_coding	protein_coding	0.108962	1.07845	0.160515	0.357787	Not regulated	10.6	10.99	10.34	10.6	11.55	10.91	11.59
Abhd14a	<a href='https://www.ncbi.nlm.nih.gov/gene/?term=300982' target="_blank"> 300982 </a>	abhydrolase domain containing 14A	protein_coding	protein_coding	0.388089	1.30866	0.00482648	0.0307682	Not regulated	15.52	17.72	16.74	18.99	25.88	20.64	21.12
Abhd14b	<a href='https://www.ncbi.nlm.nih.gov/gene/?term=300983' target="_blank"> 300983 </a>	abhydrolase domain containing 14b	protein_coding	protein_coding	0.0819317	1.05843	0.48961	0.698962	Not regulated	221.24	234.48	208.75	240.04	284.02	220.35	213.34
Abhd15	<a href='https://www.ncbi.nlm.nih.gov/gene/?term=303343' target="_blank"> 303343 </a>	abhydrolase domain containing 15	protein_coding	protein_coding	0.640544	1.55892	0.0106799	0.0558212	Not regulated	1.4	1.78	1.16	2.13	2.48	2.88	2.22
Abhd16a	<a href='https://www.ncbi.nlm.nih.gov/gene/?term=361796' target="_blank"> 361796 </a>	abhydrolase domain containing 16A, phospholipase	protein_coding	protein_coding	0.018236	1.01272	0.838968	0.923797	Not regulated	131.77	148	139.76	149.77	154.15	149.47	129.04
Abhd16b	<a href='https://www.ncbi.nlm.nih.gov/gene/?term=311720' target="_blank"> 311720 </a>	abhydrolase domain containing 16B	protein_coding	protein_coding	-0.00288174	-1.002	0.980064	0.990882	Not regulated	8.96	10.39	8.76	11.11	9.54	10.94	8.96
Abhd17a	<a href='https://www.ncbi.nlm.nih.gov/gene/?term=299617' target="_blank"> 299617 </a>	abhydrolase domain containing 17A, depalmitoylase	protein_coding	protein_coding	0.0659347	1.04676	0.361766	0.584895	Not regulated	141.11	149.21	144.03	153.49	160.74	156.67	144.63
Abhd17b	<a href='https://www.ncbi.nlm.nih.gov/gene/?term=309399' target="_blank"> 309399 </a>	abhydrolase domain containing 17B, depalmitoylase	protein_coding	protein_coding	-0.167635	-1.12322	0.110495	0.281386	Not regulated	19.48	20.93	18.44	21.08	17.23	17.51	18.65
Abhd17c	<a href='https://www.ncbi.nlm.nih.gov/gene/?term=361601' target="_blank"> 361601 </a>	abhydrolase domain containing 17C, depalmitoylase	protein_coding	protein_coding	-0.0137518	-1.00958	0.885348	0.947936	Not regulated	31.04	33.68	36.37	32.37	30.25	33.55	35.58
Abhd18	<a href='https://www.ncbi.nlm.nih.gov/gene/?term=499602' target="_blank"> 499602 </a>	abhydrolase domain containing 18			-0.263785	-1.20062	0.208177	0.421361	Not regulated	4.27	3.5	3.44	2.7	2.73	2.7	3.23
Abhd2	<a href='https://www.ncbi.nlm.nih.gov/gene/?term=293050' target="_blank"> 293050 </a>	abhydrolase domain containing 2, acylglycerol lipase	protein_coding	protein_coding	-0.349985	-1.27455	0.000208493	0.00258873	Not regulated	174.21	184.19	162.03	182.83	127.91	159.88	127.17
Abhd3	<a href='https://www.ncbi.nlm.nih.gov/gene/?term=291793' target="_blank"> 291793 </a>	abhydrolase domain containing 3, phospholipase	protein_coding	protein_coding	-0.154944	-1.11338	0.65594	0.815903	Not regulated	1.84	1.16	1.39	1.6	0.94	1.43	1.34
Abhd4	<a href='https://www.ncbi.nlm.nih.gov/gene/?term=364380' target="_blank"> 364380 </a>	abhydrolase domain containing 4, N-acyl phospholipase B	protein_coding	protein_coding	-0.0688557	-1.04888	0.446761	0.663934	Not regulated	113.02	124.79	126.33	129.67	129.57	112.62	111.49
Abhd5	<a href='https://www.ncbi.nlm.nih.gov/gene/?term=316122' target="_blank"> 316122 </a>	abhydrolase domain containing 5, lysophosphatidic acid acyltransferase	protein_coding	protein_coding	0.270241	1.20601	0.0104261	0.054801	Not regulated	435.3	457.4	536.91	534.12	632.78	596.17	550.62
Abhd6	<a href='https://www.ncbi.nlm.nih.gov/gene/?term=305795' target="_blank"> 305795 </a>	abhydrolase domain containing 6, acylglycerol lipase	protein_coding	protein_coding	0.179763	1.1327	0.180143	0.384801	Not regulated	15.39	14.65	14.42	11.05	13.79	16.73	16.44
Abhd8	<a href='https://www.ncbi.nlm.nih.gov/gene/?term=306338' target="_blank"> 306338 </a>	abhydrolase domain containing 8	protein_coding	protein_coding	0.248365	1.18786	0.0859165	0.239121	Not regulated	10.01	9.4	11.45	11.89	11.55	14.49	11.94
Abi1	<a href='https://www.ncbi.nlm.nih.gov/gene/?term=79249' target="_blank"> 79249 </a>	abl-interactor 1	protein_coding	protein_coding	0.0241327	1.01687	0.740038	0.86609	Not regulated	38.4	36.7	38.61	36.4	36.08	38.44	39.99
Abi2	<a href='https://www.ncbi.nlm.nih.gov/gene/?term=286928' target="_blank"> 286928 </a>	abl-interactor 2	protein_coding	protein_coding	-0.0909749	-1.06509	0.445877	0.663527	Not regulated	12.27	13.17	12.95	12.67	10.35	14.13	11.78
Abi3	<a href='https://www.ncbi.nlm.nih.gov/gene/?term=303476' target="_blank"> 303476 </a>	ABI family, member 3	protein_coding	protein_coding	-0.0648146	-1.04595	0.828803	0.918732	Not regulated	3.07	2.17	3.07	2.06	1.74	3.15	2.6
Abi3bp	<a href='https://www.ncbi.nlm.nih.gov/gene/?term=363767' target="_blank"> 363767 </a>	ABI family member 3 binding protein	protein_coding	protein_coding	0.0598366	1.04235	0.735857	0.86436	Not regulated	17.85	16.25	16.68	11.21	13.8	19.67	14.15
Abitram	<a href='https://www.ncbi.nlm.nih.gov/gene/?term=298018' target="_blank"> 298018 </a>	actin binding transcription modulator			-0.112355	-1.08099	0.28893	0.514079	Not regulated	8.59	8.58	8.34	9.09	7.71	7.85	8.49
Abl2	<a href='https://www.ncbi.nlm.nih.gov/gene/?term=304883' target="_blank"> 304883 </a>	ABL proto-oncogene 2, non-receptor tyrosine kinase	protein_coding	protein_coding	-0.00878368	-1.00611	0.949033	0.977466	Not regulated	7.34	9.95	7.02	8.54	8.61	7.54	8.61
Ablim2	<a href='https://www.ncbi.nlm.nih.gov/gene/?term=360958' target="_blank"> 360958 </a>	actin binding LIM protein family, member 2	protein_coding	protein_coding	0.427279	1.34469	0.00860347	0.0472764	Not regulated	13.52	20.23	14.81	17.83	24.64	18.64	23.6
Ablim3	<a href='https://www.ncbi.nlm.nih.gov/gene/?term=307395' target="_blank"> 307395 </a>	actin binding LIM protein family, member 3	protein_coding	protein_coding	-0.847675	-1.7996	0.00318971	0.0223953	Down in F_UVB_WT_MG	4.56	3.82	4.18	2.45	1.37	2.62	2.32
Abr	<a href='https://www.ncbi.nlm.nih.gov/gene/?term=287537' target="_blank"> 287537 </a>	ABR activator of RhoGEF and GTPase	protein_coding	protein_coding	-0.146653	-1.107	0.130171	0.313759	Not regulated	54.95	50.36	45.63	50.37	43.04	50.76	44.93
Abra	<a href='https://www.ncbi.nlm.nih.gov/gene/?term=286965' target="_blank"> 286965 </a>	actin-binding Rho activating protein	protein_coding	protein_coding	0.944123	1.92402	0.000922594	0.00840895	Up in F_UVB_WT_MG	2.7	6.68	4.02	4.43	9.11	9.24	7.51
Abracl	<a href='https://www.ncbi.nlm.nih.gov/gene/?term=685045' target="_blank"> 685045 </a>	ABRA C-terminal like	protein_coding	protein_coding	0.219156	1.16405	0.0139811	0.0678295	Not regulated	21.87	23.71	22.32	20.87	25.54	24.8	28
Abraxas1	<a href='https://www.ncbi.nlm.nih.gov/gene/?term=289468' target="_blank"> 289468 </a>	abraxas 1, BRCA1 A complex subunit			0.148938	1.10875	0.551105	0.747108	Not regulated	5.03	4.09	4.62	4.83	3.76	4.75	6.9
Abraxas2	<a href='https://www.ncbi.nlm.nih.gov/gene/?term=293570' target="_blank"> 293570 </a>	abraxas 2, BRISC complex subunit			-0.0742874	-1.05284	0.345183	0.57059	Not regulated	22.13	23.79	22.84	24.42	21.76	21.61	22.99
Abt1	<a href='https://www.ncbi.nlm.nih.gov/gene/?term=306960' target="_blank"> 306960 </a>	activator of basal transcription 1	protein_coding	protein_coding	0.138911	1.10107	0.313925	0.538784	Not regulated	24.4	24.82	19.08	26.61	28.06	25.33	24.95
Abtb1	<a href='https://www.ncbi.nlm.nih.gov/gene/?term=297432' target="_blank"> 297432 </a>	ankyrin repeat and BTB domain containing 1	protein_coding	protein_coding	-0.14787	-1.10793	0.159318	0.355709	Not regulated	31.66	28.93	29.47	26.19	28.05	26.68	24.21
Abtb2	<a href='https://www.ncbi.nlm.nih.gov/gene/?term=171440' target="_blank"> 171440 </a>	ankyrin repeat and BTB domain containing 2	protein_coding	protein_coding	-0.407519	-1.3264	0.00148374	0.0121945	Not regulated	6.16	6.34	5.98	6.3	3.84	5.25	4.98
AC093965.1	<a href='https://www.ncbi.nlm.nih.gov/gene/?term=NA' target="_blank"> NA </a>				-0.132225	-1.09598	0.279345	0.503442	Not regulated	89.59	85.23	88.1	69.35	78.12	81.29	68.18
AC094053.1	<a href='https://www.ncbi.nlm.nih.gov/gene/?term=NA' target="_blank"> NA </a>				0.109932	1.07918	0.384931	0.606925	Not regulated	14.83	17.4	15.42	17.32	19.65	18.62	14.39
AC094055.1	<a href='https://www.ncbi.nlm.nih.gov/gene/?term=NA' target="_blank"> NA </a>				-0.83493	-1.78377	1.29799e-07	5.60409e-06	Down in F_UVB_WT_MG	8.6	10.97	11.76	10.68	6.25	5.7	5.71
AC094212.1	<a href='https://www.ncbi.nlm.nih.gov/gene/?term=NA' target="_blank"> NA </a>				-0.303348	-1.234	0.15394	0.348747	Not regulated	4.18	3.89	3.65	4.31	3.82	2.78	3.1
AC094643.2	<a href='https://www.ncbi.nlm.nih.gov/gene/?term=NA' target="_blank"> NA </a>				0.117181	1.08461	0.271913	0.495737	Not regulated	51.47	45.84	44.86	52.02	54.66	54	49.31
AC095693.1	<a href='https://www.ncbi.nlm.nih.gov/gene/?term=NA' target="_blank"> NA </a>				0.711065	1.63701	0.0206716	0.090128	Not regulated	0.43	0.46	0.37	0.39	0.57	0.59	0.86
AC097183.1	<a href='https://www.ncbi.nlm.nih.gov/gene/?term=NA' target="_blank"> NA </a>				-0.142692	-1.10396	0.490371	0.699524	Not regulated	8.41	10.68	8.83	10.22	9.12	8.05	8.74
AC097784.1	<a href='https://www.ncbi.nlm.nih.gov/gene/?term=NA' target="_blank"> NA </a>				-0.0448726	-1.03159	0.690555	0.837502	Not regulated	10.11	10.8	9.59	9.73	9.36	9.59	10.2
AC098459.1	<a href='https://www.ncbi.nlm.nih.gov/gene/?term=NA' target="_blank"> NA </a>				0.431401	1.34854	0.00217059	0.0165129	Not regulated	14.81	16.91	16.29	18.79	24.08	22.4	21.13
AC098547.2	<a href='https://www.ncbi.nlm.nih.gov/gene/?term=NA' target="_blank"> NA </a>				0.0773689	1.05509	0.862729	0.936995	Not regulated	4.88	4.02	2.05	1.18	3.64	2.92	2.85
AC098622.1	<a href='https://www.ncbi.nlm.nih.gov/gene/?term=NA' target="_blank"> NA </a>				0.18765	1.13891	0.641883	0.807928	Not regulated	3.49	4.25	2.48	2.52	3.84	3.4	3.67
AC099183.3	<a href='https://www.ncbi.nlm.nih.gov/gene/?term=NA' target="_blank"> NA </a>				-1.13081	-2.18982	0.0185315	0.0833848	Not regulated	19.6	9.43	18.42	15.6	4.45	3.38	13.76
AC099450.1	<a href='https://www.ncbi.nlm.nih.gov/gene/?term=NA' target="_blank"> NA </a>				-0.0451913	-1.03182	0.554301	0.74902	Not regulated	1795.95	1709.53	1653.66	1547.97	1706.88	1539.27	1630.48
AC099453.1	<a href='https://www.ncbi.nlm.nih.gov/gene/?term=NA' target="_blank"> NA </a>				-0.263963	-1.20077	0.0964362	0.258238	Not regulated	61.06	51.44	50.08	45.87	42.41	48.89	38.94
AC103221.1	<a href='https://www.ncbi.nlm.nih.gov/gene/?term=NA' target="_blank"> NA </a>				0.0994885	1.07139	0.64113	0.807286	Not regulated	11.66	15.79	11.2	14.25	15.65	14.02	12.99
AC105531.1	<a href='https://www.ncbi.nlm.nih.gov/gene/?term=NA' target="_blank"> NA </a>				-0.0994117	-1.07134	0.14146	0.330024	Not regulated	30.75	30.08	30.37	30.94	27.64	30.41	26.91
AC105662.1	<a href='https://www.ncbi.nlm.nih.gov/gene/?term=NA' target="_blank"> NA </a>				0.00485909	1.00337	0.982726	0.991857	Not regulated	2.38	2.45	3.15	1.87	2.51	2.53	2.39
AC109048.1	<a href='https://www.ncbi.nlm.nih.gov/gene/?term=NA' target="_blank"> NA </a>				-0.0395373	-1.02778	0.709991	0.8489	Not regulated	15.78	15.37	17.96	16.01	15.54	17.42	14.75
AC109542.1	<a href='https://www.ncbi.nlm.nih.gov/gene/?term=NA' target="_blank"> NA </a>				0.148395	1.10834	0.25284	0.475735	Not regulated	58.62	65.61	62.63	68.91	76.61	78.12	58.21
AC109942.1	<a href='https://www.ncbi.nlm.nih.gov/gene/?term=NA' target="_blank"> NA </a>				-0.352179	-1.27649	0.0742162	0.217529	Not regulated	2.07	2.39	2.27	1.91	1.87	1.77	1.45
AC109958.1	<a href='https://www.ncbi.nlm.nih.gov/gene/?term=NA' target="_blank"> NA </a>				0.0263036	1.0184	0.83668	0.922714	Not regulated	32.91	33.26	34.57	28.31	34.6	33.07	30.96
AC110315.1	<a href='https://www.ncbi.nlm.nih.gov/gene/?term=NA' target="_blank"> NA </a>				-0.468512	-1.38368	0.291065	0.515941	Not regulated	0.51	0.8	1.65	0.68	0.58	0.87	0.55
AC111231.1	<a href='https://www.ncbi.nlm.nih.gov/gene/?term=NA' target="_blank"> NA </a>				0.36761	1.29021	2.55652e-06	6.92395e-05	Not regulated	366.63	354.48	342.57	379.94	467.44	432.79	498.03
AC111885.1	<a href='https://www.ncbi.nlm.nih.gov/gene/?term=NA' target="_blank"> NA </a>				0.080559	1.05743	0.150722	0.344008	Not regulated	234.07	244.81	237.63	247.37	243.47	276.25	258.07
AC117058.1	<a href='https://www.ncbi.nlm.nih.gov/gene/?term=NA' target="_blank"> NA </a>				-1.06649	-2.09434	0.00127469	0.0108105	Down in F_UVB_WT_MG	8.38	4.71	9.37	10.24	3.82	5.4	2.6
AC117869.1	<a href='https://www.ncbi.nlm.nih.gov/gene/?term=NA' target="_blank"> NA </a>				-0.706665	-1.63203	0.018631	0.0837293	Not regulated	16.7	10.49	13.16	11.87	6.64	9.08	8.36
AC118165.1	<a href='https://www.ncbi.nlm.nih.gov/gene/?term=NA' target="_blank"> NA </a>				0.0187326	1.01307	0.888831	0.949677	Not regulated	4.16	3.98	4.22	3.78	3.97	4.15	3.95
AC118963.1	<a href='https://www.ncbi.nlm.nih.gov/gene/?term=NA' target="_blank"> NA </a>				0.181043	1.1337	0.635553	0.804435	Not regulated	4.59	9.03	4.79	4.58	4.89	6.88	8.09
AC119007.4	<a href='https://www.ncbi.nlm.nih.gov/gene/?term=NA' target="_blank"> NA </a>				0.715191	1.6417	0.17167	0.373326	Not regulated	0.42	0.65	0.54	1.07	1.41	0.73	0.62
AC119015.1	<a href='https://www.ncbi.nlm.nih.gov/gene/?term=NA' target="_blank"> NA </a>				0.398893	1.3185	0.0578288	0.184398	Not regulated	4.31	4.14	4.86	4.97	5.49	7.25	5.43
AC119332.1	<a href='https://www.ncbi.nlm.nih.gov/gene/?term=NA' target="_blank"> NA </a>				-0.299976	-1.23112	0.133941	0.318944	Not regulated	2.54	2.01	2.38	2.01	2.02	1.67	1.73
AC119762.4	<a href='https://www.ncbi.nlm.nih.gov/gene/?term=NA' target="_blank"> NA </a>				0.251345	1.19032	0.144573	0.334936	Not regulated	2.57	2.68	2.14	3.01	3.29	3.32	2.68
AC120310.1	<a href='https://www.ncbi.nlm.nih.gov/gene/?term=NA' target="_blank"> NA </a>				-0.117119	-1.08457	0.61453	0.791556	Not regulated	6.61	8.59	10.68	10.53	8.43	8.75	7.97
AC123346.1	<a href='https://www.ncbi.nlm.nih.gov/gene/?term=NA' target="_blank"> NA </a>				0.0837878	1.0598	0.310283	0.534821	Not regulated	74.23	85.08	75.55	89.2	87.82	86.46	85.75
AC124205.1	<a href='https://www.ncbi.nlm.nih.gov/gene/?term=NA' target="_blank"> NA </a>				0.413373	1.3318	0.14161	0.330257	Not regulated	3.39	3.07	3.35	4.36	5.26	4.01	4.85
AC126572.1	<a href='https://www.ncbi.nlm.nih.gov/gene/?term=NA' target="_blank"> NA </a>				-0.112905	-1.0814	0.455003	0.669984	Not regulated	2.76	2.73	2.17	2.75	2.32	2.71	2.31
AC126572.2	<a href='https://www.ncbi.nlm.nih.gov/gene/?term=NA' target="_blank"> NA </a>				-0.288094	-1.22103	0.204195	0.416151	Not regulated	1.45	1.91	1.51	1.65	1.14	1.56	1.34
AC126641.1	<a href='https://www.ncbi.nlm.nih.gov/gene/?term=NA' target="_blank"> NA </a>				-0.379823	-1.30118	0.290518	0.51552	Not regulated	0.57	0.53	0.36	0.4	0.25	0.47	0.36
AC127920.1	<a href='https://www.ncbi.nlm.nih.gov/gene/?term=NA' target="_blank"> NA </a>				0.15506	1.11347	0.21793	0.434518	Not regulated	11.19	13.1	11.26	12.24	13.84	14.19	11.99
AC128207.1	<a href='https://www.ncbi.nlm.nih.gov/gene/?term=NA' target="_blank"> NA </a>				0.263538	1.20042	0.20843	0.421744	Not regulated	10.5	9.76	11.58	10.36	10.75	10.53	16.69
AC128848.1	<a href='https://www.ncbi.nlm.nih.gov/gene/?term=NA' target="_blank"> NA </a>				0.629136	1.54664	2.06844e-05	0.00038741	Up in F_UVB_WT_MG	111.92	158.82	108.08	134.56	201.11	195.08	199.16
AC128859.3	<a href='https://www.ncbi.nlm.nih.gov/gene/?term=NA' target="_blank"> NA </a>				-1.25181	-2.38139	0.000708173	0.00680097	Down in F_UVB_WT_MG	2.99	1.73	2.43	1.26	0.67	1.02	1.01
AC128960.1	<a href='https://www.ncbi.nlm.nih.gov/gene/?term=NA' target="_blank"> NA </a>				-0.202411	-1.15062	0.49362	0.70235	Not regulated	20.66	11.43	17.28	11.79	13.77	14.37	11.48
AC129049.1	<a href='https://www.ncbi.nlm.nih.gov/gene/?term=NA' target="_blank"> NA </a>				0.143921	1.1049	0.675508	0.826775	Not regulated	3.19	2.93	4.3	2.72	4.28	4.25	2.62
AC130232.2	<a href='https://www.ncbi.nlm.nih.gov/gene/?term=NA' target="_blank"> NA </a>				-0.200507	-1.1491	0.221258	0.437906	Not regulated	6.61	6.74	8.42	9.08	6.25	6.5	7.4
AC130391.3	<a href='https://www.ncbi.nlm.nih.gov/gene/?term=NA' target="_blank"> NA </a>				-0.540025	-1.454	5.19893e-05	0.000841063	Down in F_UVB_WT_MG	31.38	39.98	34.69	45.17	24.66	28.59	25
AC130970.1	<a href='https://www.ncbi.nlm.nih.gov/gene/?term=NA' target="_blank"> NA </a>				-0.153335	-1.11214	0.487286	0.696337	Not regulated	2.62	2.69	1.77	2.09	1.97	2.65	1.61
AC131360.1	<a href='https://www.ncbi.nlm.nih.gov/gene/?term=NA' target="_blank"> NA </a>				0.00407562	1.00283	0.981697	0.991464	Not regulated	1.78	2.04	1.89	2.06	1.97	2.07	1.81
AC131360.2	<a href='https://www.ncbi.nlm.nih.gov/gene/?term=NA' target="_blank"> NA </a>				0.017997	1.01255	0.970514	0.986765	Not regulated	0.49	0.65	0.51	0.52	0.3	0.92	0.46
AC131483.1	<a href='https://www.ncbi.nlm.nih.gov/gene/?term=NA' target="_blank"> NA </a>				0.117519	1.08487	0.772842	0.885364	Not regulated	6.63	6.13	4.65	8.6	9.72	6.48	4.76
AC133270.1	<a href='https://www.ncbi.nlm.nih.gov/gene/?term=NA' target="_blank"> NA </a>				-0.010917	-1.0076	0.951596	0.978864	Not regulated	26.71	30	28.29	27.04	27.48	30.85	25.42
AC136661.1	<a href='https://www.ncbi.nlm.nih.gov/gene/?term=NA' target="_blank"> NA </a>				0.0252418	1.01765	0.978115	0.990404	Not regulated	0.33	7.12	18.56	0.18	6.5	5.04	10.04
AC139642.1	<a href='https://www.ncbi.nlm.nih.gov/gene/?term=NA' target="_blank"> NA </a>				-0.792056	-1.73154	8.97169e-07	2.79404e-05	Down in F_UVB_WT_MG	1705.33	1930.35	2177.49	1739.28	777.71	1207.03	1300.81
AC140988.1	<a href='https://www.ncbi.nlm.nih.gov/gene/?term=NA' target="_blank"> NA </a>				0.534362	1.4483	0.252555	0.475504	Not regulated	1.25	3.91	2.15	3.86	4.32	4.81	3.07
AC141102.1	<a href='https://www.ncbi.nlm.nih.gov/gene/?term=NA' target="_blank"> NA </a>				0.355142	1.27911	0.153869	0.34872	Not regulated	7.1	7.01	5.96	7.15	8.99	7.25	9.9
AC142154.1	<a href='https://www.ncbi.nlm.nih.gov/gene/?term=NA' target="_blank"> NA </a>				-0.236689	-1.17829	0.364005	0.586945	Not regulated	1.49	1.91	2.04	1.84	1.61	1.22	1.81
Acaa1a	<a href='https://www.ncbi.nlm.nih.gov/gene/?term=24157' target="_blank"> 24157 </a>	acetyl-CoA acyltransferase 1A	protein_coding	protein_coding	0.11576	1.08355	0.373699	0.596001	Not regulated	94.73	92.57	90.73	111.1	123.88	93.97	97.97
Acaa2	<a href='https://www.ncbi.nlm.nih.gov/gene/?term=170465' target="_blank"> 170465 </a>	acetyl-CoA acyltransferase 2	protein_coding	protein_coding	0.0595101	1.04211	0.571239	0.760705	Not regulated	931.62	734.55	836.74	791.99	845.25	950.04	790.17
Acaca	<a href='https://www.ncbi.nlm.nih.gov/gene/?term=60581' target="_blank"> 60581 </a>	acetyl-CoA carboxylase alpha	protein_coding	protein_coding	-0.013834	-1.00964	0.834678	0.921893	Not regulated	122.91	126.94	115.81	134.35	123.68	124.55	123.93
Acacb	<a href='https://www.ncbi.nlm.nih.gov/gene/?term=116719' target="_blank"> 116719 </a>	acetyl-CoA carboxylase beta	protein_coding	protein_coding	0.283135	1.21684	0.0868398	0.240962	Not regulated	103.95	121.93	83.18	128.69	139.21	106.7	153.26
Acad10	<a href='https://www.ncbi.nlm.nih.gov/gene/?term=304500' target="_blank"> 304500 </a>	acyl-CoA dehydrogenase family, member 10	protein_coding	protein_coding	-0.0521351	-1.0368	0.424251	0.643367	Not regulated	339.49	342.01	317.27	330.78	336.78	311.34	310.87
Acad11	<a href='https://www.ncbi.nlm.nih.gov/gene/?term=315973' target="_blank"> 315973 </a>	acyl-CoA dehydrogenase family, member 11	protein_coding	protein_coding	-0.725461	-1.65343	0.000185836	0.00235806	Down in F_UVB_WT_MG	19.15	26.98	22.41	31.11	16.74	17.37	11.19
Acad8	<a href='https://www.ncbi.nlm.nih.gov/gene/?term=367196' target="_blank"> 367196 </a>	acyl-CoA dehydrogenase family, member 8	protein_coding	protein_coding	-0.0313707	-1.02198	0.85847	0.934966	Not regulated	6.32	6.04	5.46	4.23	5.34	5.33	5.48
Acad9	<a href='https://www.ncbi.nlm.nih.gov/gene/?term=294973' target="_blank"> 294973 </a>	acyl-CoA dehydrogenase family, member 9	protein_coding	protein_coding	0.0408333	1.02871	0.721341	0.856464	Not regulated	301.01	314.7	283.08	323.11	365.55	272.31	303.39
Acadl	<a href='https://www.ncbi.nlm.nih.gov/gene/?term=25287' target="_blank"> 25287 </a>	acyl-CoA dehydrogenase, long chain	protein_coding	protein_coding	-0.159192	-1.11666	0.0153693	0.0725012	Not regulated	178.9	172.11	159.9	166.33	155.67	149.32	150.28
Acadm	<a href='https://www.ncbi.nlm.nih.gov/gene/?term=24158' target="_blank"> 24158 </a>	acyl-CoA dehydrogenase medium chain	protein_coding	protein_coding	0.313098	1.24237	0.012176	0.0612391	Not regulated	1455.74	1362.03	1087.56	1407.07	1839.59	1447.67	1690.67
Acads	<a href='https://www.ncbi.nlm.nih.gov/gene/?term=64304' target="_blank"> 64304 </a>	acyl-CoA dehydrogenase short chain	protein_coding	protein_coding	0.311508	1.241	0.000538835	0.00552461	Not regulated	36.16	37.91	39.93	40.41	49.44	50.3	43.76
Acadsb	<a href='https://www.ncbi.nlm.nih.gov/gene/?term=25618' target="_blank"> 25618 </a>	acyl-CoA dehydrogenase, short/branched chain	protein_coding	protein_coding	-0.458821	-1.37442	0.32845	0.554824	Not regulated	10.69	9.51	17.42	7.24	12.39	6.42	5.78
Acadvl	<a href='https://www.ncbi.nlm.nih.gov/gene/?term=25363' target="_blank"> 25363 </a>	acyl-CoA dehydrogenase, very long chain	protein_coding	protein_coding	-0.0287449	-1.02012	0.682256	0.831666	Not regulated	250.06	259.78	238.27	269.53	260.94	247.9	240.09
Acan	<a href='https://www.ncbi.nlm.nih.gov/gene/?term=58968' target="_blank"> 58968 </a>	aggrecan	protein_coding	protein_coding	-0.558325	-1.47256	0.163483	0.362575	Not regulated	0.28	0.65	0.74	0.88	0.29	0.5	0.52
Acap1	<a href='https://www.ncbi.nlm.nih.gov/gene/?term=287443' target="_blank"> 287443 </a>	ArfGAP with coiled-coil, ankyrin repeat and PH domains 1	protein_coding	protein_coding	-0.0335656	-1.02354	0.87787	0.944343	Not regulated	2.23	2.35	2.83	1.94	2.11	2.43	2.38
Acap2	<a href='https://www.ncbi.nlm.nih.gov/gene/?term=619382' target="_blank"> 619382 </a>	ArfGAP with coiled-coil, ankyrin repeat and PH domains 2	protein_coding	protein_coding	0.0370375	1.026	0.56309	0.754836	Not regulated	35.02	34.24	34.34	36.68	36.05	35.95	36.18
Acap3	<a href='https://www.ncbi.nlm.nih.gov/gene/?term=313772' target="_blank"> 313772 </a>	ArfGAP with coiled-coil, ankyrin repeat and PH domains 3	protein_coding	protein_coding	0.27557	1.21047	0.000219537	0.00269566	Not regulated	16.69	16.95	17.14	17.02	20.7	20	20.97
Acat1	<a href='https://www.ncbi.nlm.nih.gov/gene/?term=25014' target="_blank"> 25014 </a>	acetyl-CoA acetyltransferase 1	protein_coding	protein_coding	-0.0104422	-1.00726	0.895062	0.951518	Not regulated	201.72	206.66	200.97	207.55	216.68	210.56	181.74
Acat2	<a href='https://www.ncbi.nlm.nih.gov/gene/?term=308100' target="_blank"> 308100 </a>	acetyl-CoA acetyltransferase 2	protein_coding	protein_coding	0.283559	1.21719	0.0117344	0.0597642	Not regulated	496.75	529.39	503.66	629.22	721.26	599.95	648.71
Acat2l1	<a href='https://www.ncbi.nlm.nih.gov/gene/?term=365096' target="_blank"> 365096 </a>	acetyl-CoA acetyltransferase 2-like 1			0.511574	1.4256	0.364452	0.587342	Not regulated	0.93	0.54	0.76	0.96	1.6	1.46	0.37
Acbd3	<a href='https://www.ncbi.nlm.nih.gov/gene/?term=289312' target="_blank"> 289312 </a>	acyl-CoA binding domain containing 3	protein_coding	protein_coding	-0.0477339	-1.03364	0.574819	0.763098	Not regulated	25.36	27.75	27.14	26.59	27.44	24.65	25.45
Acbd4	<a href='https://www.ncbi.nlm.nih.gov/gene/?term=303577' target="_blank"> 303577 </a>	acyl-CoA binding domain containing 4	protein_coding	protein_coding	-0.0397552	-1.02794	0.858176	0.934966	Not regulated	8.25	7.26	7.77	4.6	7.56	7.35	5.77
Acbd5	<a href='https://www.ncbi.nlm.nih.gov/gene/?term=307170' target="_blank"> 307170 </a>	acyl-CoA binding domain containing 5	protein_coding	protein_coding	-0.062529	-1.04429	0.513025	0.718512	Not regulated	15.92	16.31	15.92	14.49	13.86	15.48	15.83
Acbd6	<a href='https://www.ncbi.nlm.nih.gov/gene/?term=289125' target="_blank"> 289125 </a>	acyl-CoA binding domain containing 6	protein_coding	protein_coding	0.404854	1.32396	5.44596e-06	0.000130487	Not regulated	51.57	48.35	47.08	49.49	68.9	64.36	61.05
Accs	<a href='https://www.ncbi.nlm.nih.gov/gene/?term=311218' target="_blank"> 311218 </a>	1-aminocyclopropane-1-carboxylate synthase	protein_coding	protein_coding	0.170588	1.12552	0.29804	0.52266	Not regulated	6.92	5.07	5.36	6.09	6.63	6.6	6.53
Acd	<a href='https://www.ncbi.nlm.nih.gov/gene/?term=307798' target="_blank"> 307798 </a>	ACD, shelterin complex subunit and telomerase recruitment factor	protein_coding	protein_coding	0.0289869	1.0203	0.776976	0.886658	Not regulated	27.7	30.2	30.22	32.53	32.53	29.69	30.13
Ace	<a href='https://www.ncbi.nlm.nih.gov/gene/?term=24310' target="_blank"> 24310 </a>	angiotensin I converting enzyme			-0.0456301	-1.03213	0.757419	0.876142	Not regulated	104.1	98.55	93.23	107.08	115.05	75.81	105.23
Ace2	<a href='https://www.ncbi.nlm.nih.gov/gene/?term=302668' target="_blank"> 302668 </a>	angiotensin I converting enzyme 2	protein_coding	protein_coding	-0.409078	-1.32784	0.0321954	0.123436	Not regulated	12.68	11.13	10.54	10.15	5.81	8.62	10.78
Acer1	<a href='https://www.ncbi.nlm.nih.gov/gene/?term=301118' target="_blank"> 301118 </a>	alkaline ceramidase 1	protein_coding	protein_coding	0.519294	1.43325	0.0295251	0.115887	Not regulated	19.78	13.39	14.33	18.65	19.7	17.34	34.12
Acer2	<a href='https://www.ncbi.nlm.nih.gov/gene/?term=313339' target="_blank"> 313339 </a>	alkaline ceramidase 2	protein_coding	protein_coding	-0.118994	-1.08598	0.52259	0.726029	Not regulated	10.44	15.52	12.05	11	13.55	11.99	8.3
Acer3	<a href='https://www.ncbi.nlm.nih.gov/gene/?term=499210' target="_blank"> 499210 </a>	alkaline ceramidase 3	protein_coding	protein_coding	-0.16161	-1.11853	0.0961348	0.257742	Not regulated	30.1	33.83	30.07	37.74	29.36	32.06	29.45
Ache	<a href='https://www.ncbi.nlm.nih.gov/gene/?term=83817' target="_blank"> 83817 </a>	acetylcholinesterase	protein_coding	protein_coding	0.0696191	1.04944	0.720393	0.855797	Not regulated	11.1	9.34	11.96	9.08	10.83	13.68	8.13
Acin1	<a href='https://www.ncbi.nlm.nih.gov/gene/?term=305884' target="_blank"> 305884 </a>	apoptotic chromatin condensation inducer 1	protein_coding	protein_coding	0.0363944	1.02555	0.584138	0.77043	Not regulated	70.31	75.46	67.94	66.16	75	74.87	71.73
Ackr2	<a href='https://www.ncbi.nlm.nih.gov/gene/?term=140473' target="_blank"> 140473 </a>	atypical chemokine receptor 2	protein_coding	protein_coding	-0.0803867	-1.0573	0.733017	0.862549	Not regulated	4.87	6.5	5.62	3.07	5.04	4.96	4.28
Ackr3	<a href='https://www.ncbi.nlm.nih.gov/gene/?term=84348' target="_blank"> 84348 </a>	atypical chemokine receptor 3			-0.0139553	-1.00972	0.955186	0.979629	Not regulated	20.19	17.88	21.1	13.43	14.87	27.14	11.86
Ackr4	<a href='https://www.ncbi.nlm.nih.gov/gene/?term=685243' target="_blank"> 685243 </a>	atypical chemokine receptor 4	protein_coding	protein_coding	0.543728	1.45773	0.0451227	0.155774	Not regulated	3.1	2.01	2.92	1.72	2.67	4.17	3.86
Acly	<a href='https://www.ncbi.nlm.nih.gov/gene/?term=24159' target="_blank"> 24159 </a>	ATP citrate lyase	protein_coding	protein_coding	0.387124	1.30778	2.625e-05	0.000480816	Not regulated	285.83	307.7	270.56	337.8	412.58	375.7	392.81
Aco1	<a href='https://www.ncbi.nlm.nih.gov/gene/?term=50655' target="_blank"> 50655 </a>	aconitase 1	protein_coding	protein_coding	0.0681592	1.04838	0.344506	0.570302	Not regulated	117.23	130.48	116.1	127.69	134.96	130.08	121.67
Aco2	<a href='https://www.ncbi.nlm.nih.gov/gene/?term=79250' target="_blank"> 79250 </a>	aconitase 2	retained_intron	protein_coding	0.0293683	1.02057	0.701675	0.843812	Not regulated	164.46	186.35	159.29	167.53	176.05	183.12	160.13
Acot1	<a href='https://www.ncbi.nlm.nih.gov/gene/?term=50559' target="_blank"> 50559 </a>	acyl-CoA thioesterase 1	protein_coding	protein_coding	-0.229697	-1.17259	0.0260417	0.106227	Not regulated	126.08	109.77	96.78	113.5	86.69	101.84	97.43
Acot11	<a href='https://www.ncbi.nlm.nih.gov/gene/?term=100363074' target="_blank"> 100363074 </a>	acyl-CoA thioesterase 11	protein_coding	protein_coding	-0.237597	-1.17903	0.198737	0.409356	Not regulated	5.72	4.6	5.53	4.64	3.87	5.19	4.1
Acot12	<a href='https://www.ncbi.nlm.nih.gov/gene/?term=170570' target="_blank"> 170570 </a>	acyl-CoA thioesterase 12	protein_coding	protein_coding	-0.680141	-1.6023	0.14037	0.328402	Not regulated	89.98	56.43	49.51	46.99	21.55	64.18	28.8
Acot13	<a href='https://www.ncbi.nlm.nih.gov/gene/?term=291135' target="_blank"> 291135 </a>	acyl-CoA thioesterase 13	protein_coding	protein_coding	-0.0725649	-1.05158	0.466598	0.679736	Not regulated	55.9	54.08	54.96	51.81	51.35	55.47	48.11
Acot2	<a href='https://www.ncbi.nlm.nih.gov/gene/?term=192272' target="_blank"> 192272 </a>	acyl-CoA thioesterase 2	protein_coding	protein_coding	-0.26087	-1.1982	0.00723222	0.0414186	Not regulated	31.53	29.78	35	31.54	27.12	26.25	25.1
Acot4	<a href='https://www.ncbi.nlm.nih.gov/gene/?term=681337' target="_blank"> 681337 </a>	acyl-CoA thioesterase 4	protein_coding	protein_coding	-0.965031	-1.95211	0.00182223	0.014381	Down in F_UVB_WT_MG	1.79	1.45	1.4	2.18	0.68	0.96	0.98
Acot5	<a href='https://www.ncbi.nlm.nih.gov/gene/?term=503049' target="_blank"> 503049 </a>	acyl-CoA thioesterase 5	protein_coding	protein_coding	-0.369646	-1.29204	0.0699109	0.209351	Not regulated	26.2	39.15	52.92	39.1	33.32	30.84	27.36
Acot6	<a href='https://www.ncbi.nlm.nih.gov/gene/?term=299193' target="_blank"> 299193 </a>	acyl-CoA thioesterase 6	protein_coding	protein_coding	-1.02952	-2.04135	0.102442	0.267898	Not regulated	1.09	0.47	0.57	1.44	0.68	0.22	0.39
Acot7	<a href='https://www.ncbi.nlm.nih.gov/gene/?term=26759' target="_blank"> 26759 </a>	acyl-CoA thioesterase 7	protein_coding	protein_coding	0.0402988	1.02833	0.659678	0.818071	Not regulated	45.51	47.74	46	46.81	49.79	50.57	43.42
Acot8	<a href='https://www.ncbi.nlm.nih.gov/gene/?term=170588' target="_blank"> 170588 </a>	acyl-CoA thioesterase 8	protein_coding	protein_coding	0.0715506	1.05085	0.596007	0.778174	Not regulated	21.13	19.89	16.5	21.51	19.8	22.32	21.56
Acot9	<a href='https://www.ncbi.nlm.nih.gov/gene/?term=302640' target="_blank"> 302640 </a>	acyl-CoA thioesterase 9	protein_coding	protein_coding	0.172044	1.12665	0.100053	0.264146	Not regulated	25.82	25.74	26.93	24.32	25.2	31.84	29.56
Acox1	<a href='https://www.ncbi.nlm.nih.gov/gene/?term=50681' target="_blank"> 50681 </a>	acyl-CoA oxidase 1	protein_coding	protein_coding	-0.0533009	-1.03764	0.661616	0.819398	Not regulated	363.31	368.9	328.8	434.42	397.78	314.19	367.27
Acox3	<a href='https://www.ncbi.nlm.nih.gov/gene/?term=83522' target="_blank"> 83522 </a>	acyl-CoA oxidase 3, pristanoyl	protein_coding	protein_coding	-0.0504666	-1.0356	0.89199	0.950204	Not regulated	79.3	87.79	64.66	152.93	125.22	75.6	79.24
Acoxl	<a href='https://www.ncbi.nlm.nih.gov/gene/?term=296138' target="_blank"> 296138 </a>	acyl-CoA oxidase-like	protein_coding	protein_coding	-0.0965196	-1.06919	0.473966	0.684649	Not regulated	433.46	503.07	444.99	494.18	504.79	474.3	338.28
Acp1	<a href='https://www.ncbi.nlm.nih.gov/gene/?term=24161' target="_blank"> 24161 </a>	acid phosphatase 1	protein_coding	protein_coding	0.00152382	1.00106	0.982169	0.99179	Not regulated	123.75	129.92	118.65	130.25	120.89	123.41	131.83
Acp2	<a href='https://www.ncbi.nlm.nih.gov/gene/?term=24162' target="_blank"> 24162 </a>	acid phosphatase 2, lysosomal	protein_coding	protein_coding	0.168966	1.12425	0.379253	0.601755	Not regulated	10.56	12.13	8.64	11.25	11.72	15.65	8.72
Acp4	<a href='https://www.ncbi.nlm.nih.gov/gene/?term=308569' target="_blank"> 308569 </a>	acid phosphatase 4			-1.13197	-2.19157	0.103721	0.269865	Not regulated	0.61	0.34	0.29	0.22	0.06	0.23	0.25
Acp5	<a href='https://www.ncbi.nlm.nih.gov/gene/?term=25732' target="_blank"> 25732 </a>	acid phosphatase 5, tartrate resistant	protein_coding	protein_coding	0.392785	1.31293	0.000521894	0.00538622	Not regulated	78.8	61.27	65.14	66.19	92.61	82.07	93.1
Acp6	<a href='https://www.ncbi.nlm.nih.gov/gene/?term=295305' target="_blank"> 295305 </a>	acid phosphatase 6, lysophosphatidic	protein_coding	protein_coding	0.517688	1.43166	1.63691e-05	0.000317775	Up in F_UVB_WT_MG	46.44	44.05	44.03	56.87	71.02	63.46	71.12
Acp7	<a href='https://www.ncbi.nlm.nih.gov/gene/?term=687403' target="_blank"> 687403 </a>	acid phosphatase 7, tartrate resistant			-0.69433	-1.61813	0.0130484	0.0644088	Not regulated	2.08	3.04	3.02	3.63	1.24	2.07	2.18
Acpp	<a href='https://www.ncbi.nlm.nih.gov/gene/?term=NA' target="_blank"> NA </a>		protein_coding	protein_coding	-0.643742	-1.56238	1.00662e-18	3.82458e-16	Down in F_UVB_WT_MG	758.4	839.2	869.45	844.39	533.84	541.07	489.38
Acrbp	<a href='https://www.ncbi.nlm.nih.gov/gene/?term=500316' target="_blank"> 500316 </a>	acrosin binding protein	protein_coding	protein_coding	-0.190888	-1.14147	0.03951	0.14193	Not regulated	18.17	17.08	16.91	17.51	17.03	14.26	15.28
Acsbg1	<a href='https://www.ncbi.nlm.nih.gov/gene/?term=171410' target="_blank"> 171410 </a>	acyl-CoA synthetase bubblegum family member 1	protein_coding	protein_coding	-0.295741	-1.22752	0.0137749	0.0670952	Not regulated	688.95	797.43	724.66	863.32	674.49	527.01	670.93
Acsf2	<a href='https://www.ncbi.nlm.nih.gov/gene/?term=619561' target="_blank"> 619561 </a>	acyl-CoA synthetase family member 2	protein_coding	protein_coding	0.0770477	1.05486	0.448619	0.665272	Not regulated	29.62	25.67	27.29	31.65	28.69	32.35	29.55
Acsf3	<a href='https://www.ncbi.nlm.nih.gov/gene/?term=498962' target="_blank"> 498962 </a>	acyl-CoA synthetase family member 3	protein_coding	protein_coding	0.708968	1.63463	8.20862e-13	1.2995e-10	Up in F_UVB_WT_MG	24.5	24.33	23.36	25.27	34.47	42.21	43.11
Acsl1	<a href='https://www.ncbi.nlm.nih.gov/gene/?term=25288' target="_blank"> 25288 </a>	acyl-CoA synthetase long-chain family member 1	protein_coding	protein_coding	-0.130045	-1.09433	0.203245	0.415105	Not regulated	44.21	50.41	45.66	46.4	37.34	41.63	49.16
Acsl3	<a href='https://www.ncbi.nlm.nih.gov/gene/?term=114024' target="_blank"> 114024 </a>	acyl-CoA synthetase long-chain family member 3	protein_coding	protein_coding	-0.0123687	-1.00861	0.905174	0.956912	Not regulated	32.3	30.48	31.13	36.71	30.4	30.95	35.4
Acsl4	<a href='https://www.ncbi.nlm.nih.gov/gene/?term=113976' target="_blank"> 113976 </a>	acyl-CoA synthetase long-chain family member 4	protein_coding	protein_coding	-0.202439	-1.15064	0.0550149	0.178436	Not regulated	44.82	40.16	46.86	51.45	40.72	42.16	37.59
Acsl5	<a href='https://www.ncbi.nlm.nih.gov/gene/?term=94340' target="_blank"> 94340 </a>	acyl-CoA synthetase long-chain family member 5	protein_coding	protein_coding	0.418493	1.33653	6.47471e-11	7.00006e-09	Not regulated	413.97	406.03	433.18	437.73	590.44	565.35	558.27
Acsl6	<a href='https://www.ncbi.nlm.nih.gov/gene/?term=117243' target="_blank"> 117243 </a>	acyl-CoA synthetase long-chain family member 6	protein_coding	protein_coding	0.0620214	1.04393	0.831722	0.920064	Not regulated	1.68	2.5	2.18	2.03	2.34	2.84	1.34
Acsm2	<a href='https://www.ncbi.nlm.nih.gov/gene/?term=246263' target="_blank"> 246263 </a>	acyl-CoA synthetase medium-chain family member 2			-0.91738	-1.88868	0.0481932	0.163155	Not regulated	4.21	2.68	3.06	2.69	0.77	3.28	0.88
Acsm3	<a href='https://www.ncbi.nlm.nih.gov/gene/?term=24763' target="_blank"> 24763 </a>	acyl-CoA synthetase medium-chain family member 3	protein_coding	protein_coding	-0.346273	-1.27127	0.000155798	0.00203917	Not regulated	586.52	691.3	666.49	674.94	577.21	487.39	492.75
Acsm4	<a href='https://www.ncbi.nlm.nih.gov/gene/?term=353317' target="_blank"> 353317 </a>	acyl-CoA synthetase medium-chain family member 4	protein_coding	protein_coding	0.216274	1.16173	0.318263	0.543155	Not regulated	457.51	615.84	550.76	717.29	834.33	429.94	772.31
Acss1	<a href='https://www.ncbi.nlm.nih.gov/gene/?term=296259' target="_blank"> 296259 </a>	acyl-CoA synthetase short-chain family member 1	protein_coding	protein_coding	-0.678775	-1.60078	6.59528e-09	4.36251e-07	Down in F_UVB_WT_MG	17.24	17.14	17.92	14.51	9.45	11.99	10
Acss2	<a href='https://www.ncbi.nlm.nih.gov/gene/?term=311569' target="_blank"> 311569 </a>	acyl-CoA synthetase short-chain family member 2	protein_coding	protein_coding	0.237872	1.17925	0.0271053	0.109061	Not regulated	97.81	92.26	91.62	103.52	127.23	98.94	114.63
Acss3	<a href='https://www.ncbi.nlm.nih.gov/gene/?term=314800' target="_blank"> 314800 </a>	acyl-CoA synthetase short-chain family member 3	protein_coding	protein_coding	0.158528	1.11615	0.634669	0.803563	Not regulated	0.84	0.96	0.76	0.45	0.72	0.87	0.92
Acta1	<a href='https://www.ncbi.nlm.nih.gov/gene/?term=29437' target="_blank"> 29437 </a>	actin, alpha 1, skeletal muscle	protein_coding	protein_coding	-0.0441164	-1.03105	0.800725	0.901917	Not regulated	648.5	911.87	823	689.84	842.31	863.58	530.42
Acta2	<a href='https://www.ncbi.nlm.nih.gov/gene/?term=81633' target="_blank"> 81633 </a>	actin alpha 2, smooth muscle			-0.156054	-1.11424	0.0569422	0.182506	Not regulated	249.94	291.02	255.74	238.74	218.66	251.53	228.03
Actb	<a href='https://www.ncbi.nlm.nih.gov/gene/?term=81822' target="_blank"> 81822 </a>	actin, beta	protein_coding	protein_coding	-0.102403	-1.07356	0.39661	0.616777	Not regulated	1667.19	1706.89	1981.2	1762.74	1356.32	1971.85	1620.45
Actbl2	<a href='https://www.ncbi.nlm.nih.gov/gene/?term=294732' target="_blank"> 294732 </a>	actin, beta-like 2	protein_coding	protein_coding	-0.847181	-1.79898	0.050738	0.168845	Not regulated	1.05	1.12	2.66	2.14	0.68	0.8	1.44
Actg1	<a href='https://www.ncbi.nlm.nih.gov/gene/?term=287876' target="_blank"> 287876 </a>	actin, gamma 1	protein_coding	protein_coding	-0.0656404	-1.04655	0.646055	0.810418	Not regulated	1154.3	1189.59	1339.04	1404.29	940.69	1484.22	1224.79
Actg2	<a href='https://www.ncbi.nlm.nih.gov/gene/?term=25365' target="_blank"> 25365 </a>	actin gamma 2, smooth muscle	protein_coding	protein_coding	0.530763	1.44469	0.000947942	0.00859287	Up in F_UVB_WT_MG	122.29	183.14	124.55	143.78	226.53	168.21	225.9
Actl6a	<a href='https://www.ncbi.nlm.nih.gov/gene/?term=361925' target="_blank"> 361925 </a>	actin-like 6A	protein_coding	protein_coding	0.194395	1.14424	0.0127428	0.0633471	Not regulated	33.98	32.53	34.61	35.19	38.79	39.5	38.77
Actn1	<a href='https://www.ncbi.nlm.nih.gov/gene/?term=81634' target="_blank"> 81634 </a>	actinin, alpha 1	protein_coding	protein_coding	-0.141456	-1.10302	0.110903	0.282095	Not regulated	91.12	88.6	82.02	90.26	69.39	87.63	82.71
Actn2	<a href='https://www.ncbi.nlm.nih.gov/gene/?term=291245' target="_blank"> 291245 </a>	actinin alpha 2	protein_coding	protein_coding	0.893957	1.85827	8.86946e-06	0.000193217	Up in F_UVB_WT_MG	14.6	28.79	21.09	21.42	39.65	46.78	32.93
Actn3	<a href='https://www.ncbi.nlm.nih.gov/gene/?term=171009' target="_blank"> 171009 </a>	actinin alpha 3	protein_coding	protein_coding	-1.75857	-3.38362	0.000334131	0.00380744	Down in F_UVB_WT_MG	55.16	72.43	100.96	59.02	22.78	32.54	8.72
Actn4	<a href='https://www.ncbi.nlm.nih.gov/gene/?term=63836' target="_blank"> 63836 </a>	actinin alpha 4	protein_coding	protein_coding	-0.0782941	-1.05577	0.18016	0.384801	Not regulated	477.67	478.95	488.06	466.27	438.76	488.07	434.64
Actr10	<a href='https://www.ncbi.nlm.nih.gov/gene/?term=299121' target="_blank"> 299121 </a>	actin related protein 10	protein_coding	protein_coding	-0.0397986	-1.02797	0.621862	0.796347	Not regulated	82.82	83.72	75.17	79.02	82.26	72.89	81.72
Actr1a	<a href='https://www.ncbi.nlm.nih.gov/gene/?term=294010' target="_blank"> 294010 </a>	actin related protein 1A	protein_coding	protein_coding	0.0598847	1.04238	0.363083	0.585972	Not regulated	139.91	147.79	150.08	158.22	155.65	153.86	155.83
Actr1b	<a href='https://www.ncbi.nlm.nih.gov/gene/?term=316333' target="_blank"> 316333 </a>	actin related protein 1B	protein_coding	protein_coding	0.172337	1.12688	0.00449059	0.0290165	Not regulated	56.07	55.91	54.11	52.36	61.62	60.32	61.54
Actr2	<a href='https://www.ncbi.nlm.nih.gov/gene/?term=289820' target="_blank"> 289820 </a>	actin related protein 2	protein_coding	protein_coding	0.161464	1.11842	0.00148213	0.0121888	Not regulated	168.47	183.68	176.44	179.84	196.08	201.87	202.77
Actr3	<a href='https://www.ncbi.nlm.nih.gov/gene/?term=81732' target="_blank"> 81732 </a>	actin related protein 3	protein_coding	protein_coding	0.0564674	1.03992	0.508039	0.714986	Not regulated	132.33	129.09	140.13	127.76	121.17	150.61	141.72
Actr5	<a href='https://www.ncbi.nlm.nih.gov/gene/?term=362258' target="_blank"> 362258 </a>	actin related protein 5	protein_coding	protein_coding	0.038503	1.02705	0.811894	0.907961	Not regulated	5.74	7.62	5.32	6.02	6.73	5.73	6.56
Actr6	<a href='https://www.ncbi.nlm.nih.gov/gene/?term=314718' target="_blank"> 314718 </a>	actin related protein 6	protein_coding	protein_coding	-0.0957566	-1.06863	0.532389	0.733364	Not regulated	8.38	6.74	7.86	8.1	6.81	7.76	7.48
Actr8	<a href='https://www.ncbi.nlm.nih.gov/gene/?term=361107' target="_blank"> 361107 </a>	actin related protein 8	protein_coding	protein_coding	0.0761257	1.05418	0.468154	0.680533	Not regulated	9.99	10.47	9.74	9.86	9.88	11.91	10.03
Acvr1	<a href='https://www.ncbi.nlm.nih.gov/gene/?term=79558' target="_blank"> 79558 </a>	activin A receptor type 1	protein_coding	protein_coding	-0.0150003	-1.01045	0.881695	0.946183	Not regulated	13.13	13.13	13.67	12.15	12.27	11.83	14.08
Acvr1b	<a href='https://www.ncbi.nlm.nih.gov/gene/?term=29381' target="_blank"> 29381 </a>	activin A receptor type 1B	protein_coding	protein_coding	-0.295969	-1.22771	0.000588579	0.00592052	Not regulated	30.54	26.53	30.24	27.62	23.52	23.01	23.73
Acvr2a	<a href='https://www.ncbi.nlm.nih.gov/gene/?term=29263' target="_blank"> 29263 </a>	activin A receptor type 2A	protein_coding	protein_coding	-0.141082	-1.10273	0.123655	0.303499	Not regulated	15.07	16.39	16.15	16.35	14.53	14.5	14.56
Acvr2b	<a href='https://www.ncbi.nlm.nih.gov/gene/?term=25366' target="_blank"> 25366 </a>	activin A receptor type 2B	protein_coding	protein_coding	0.114346	1.08248	0.776834	0.886638	Not regulated	0.78	0.8	0.75	0.49	0.58	0.94	0.82
Acvrl1	<a href='https://www.ncbi.nlm.nih.gov/gene/?term=25237' target="_blank"> 25237 </a>	activin A receptor like type 1	protein_coding	protein_coding	0.257878	1.19572	0.0551213	0.178607	Not regulated	7.28	7.66	7.25	6.07	7.25	9.84	8.39
Acy1	<a href='https://www.ncbi.nlm.nih.gov/gene/?term=300981' target="_blank"> 300981 </a>	aminoacylase 1	protein_coding	protein_coding	0.191957	1.14231	0.0550936	0.178561	Not regulated	521.96	555.92	515.41	601.16	701.86	585.58	596.63
Acy3	<a href='https://www.ncbi.nlm.nih.gov/gene/?term=293653' target="_blank"> 293653 </a>	aminoacylase 3	protein_coding	protein_coding	-0.266975	-1.20328	0.206449	0.419299	Not regulated	8.93	6.58	6.37	6.29	4.86	6.3	6.4
Acyp1	<a href='https://www.ncbi.nlm.nih.gov/gene/?term=299203' target="_blank"> 299203 </a>	acylphosphatase 1	protein_coding	protein_coding	-0.0498793	-1.03518	0.778811	0.887782	Not regulated	15.05	13.42	15.15	13.81	14.05	13.38	14.38
Acyp2	<a href='https://www.ncbi.nlm.nih.gov/gene/?term=364224' target="_blank"> 364224 </a>	acylphosphatase 2	protein_coding	protein_coding	-0.142018	-1.10345	0.470859	0.682227	Not regulated	15.6	22.24	19.78	22.5	20.29	23.33	13
Ada	<a href='https://www.ncbi.nlm.nih.gov/gene/?term=24165' target="_blank"> 24165 </a>	adenosine deaminase	protein_coding	protein_coding	0.833378	1.78185	0.000194655	0.00244662	Up in F_UVB_WT_MG	4.1	4.13	3.76	3.64	5.17	7.16	8.7
Adal	<a href='https://www.ncbi.nlm.nih.gov/gene/?term=311352' target="_blank"> 311352 </a>	adenosine deaminase-like	protein_coding	protein_coding	-0.295397	-1.22722	0.076614	0.221722	Not regulated	4.31	4.55	4.69	4.26	3.67	3.94	3.35
Adam10	<a href='https://www.ncbi.nlm.nih.gov/gene/?term=29650' target="_blank"> 29650 </a>	ADAM metallopeptidase domain 10	protein_coding	protein_coding	0.120584	1.08717	0.097387	0.259796	Not regulated	33.35	37.32	35.52	36.14	36.74	37.84	39.42
Adam12	<a href='https://www.ncbi.nlm.nih.gov/gene/?term=679837' target="_blank"> 679837 </a>	ADAM metallopeptidase domain 12	protein_coding	protein_coding	0.698096	1.62236	0.0533999	0.174775	Not regulated	0.19	0.33	0.38	0.28	0.32	0.67	0.46
Adam15	<a href='https://www.ncbi.nlm.nih.gov/gene/?term=57025' target="_blank"> 57025 </a>	ADAM metallopeptidase domain 15	protein_coding	protein_coding	0.286409	1.2196	0.00807118	0.0449458	Not regulated	38.88	39.3	37.98	30.31	41	45.92	47.26
Adam17	<a href='https://www.ncbi.nlm.nih.gov/gene/?term=57027' target="_blank"> 57027 </a>	ADAM metallopeptidase domain 17	protein_coding	protein_coding	-0.024711	-1.01728	0.783004	0.889948	Not regulated	36.05	36.97	40.54	36.17	32.99	39.26	39.1
Adam19	<a href='https://www.ncbi.nlm.nih.gov/gene/?term=303068' target="_blank"> 303068 </a>	ADAM metallopeptidase domain 19	protein_coding	protein_coding	0.0852327	1.06086	0.708047	0.848277	Not regulated	3	3.6	4.15	2.23	2.68	4.23	3.48
Adam1a	<a href='https://www.ncbi.nlm.nih.gov/gene/?term=56777' target="_blank"> 56777 </a>	ADAM metallopeptidase domain 1a			-0.759826	-1.69329	0.0117072	0.0596722	Not regulated	3.25	2.49	2.48	1.66	0.99	1.47	1.91
Adam23	<a href='https://www.ncbi.nlm.nih.gov/gene/?term=301460' target="_blank"> 301460 </a>	ADAM metallopeptidase domain 23	protein_coding	protein_coding	0.0791124	1.05637	0.750945	0.872299	Not regulated	1.76	1.59	1.67	1.32	1.56	2.1	1.37
Adam33	<a href='https://www.ncbi.nlm.nih.gov/gene/?term=311425' target="_blank"> 311425 </a>	ADAM metallopeptidase domain 33	protein_coding	protein_coding	-0.045154	-1.03179	0.850806	0.930888	Not regulated	3.17	3.21	2.95	2.46	2.99	1.87	3.47
Adam8	<a href='https://www.ncbi.nlm.nih.gov/gene/?term=499285' target="_blank"> 499285 </a>	ADAM metallopeptidase domain 8	protein_coding	protein_coding	-0.376719	-1.29839	0.0241939	0.100824	Not regulated	33.7	46.31	39.77	26.31	24.82	29.38	29.89
Adam9	<a href='https://www.ncbi.nlm.nih.gov/gene/?term=290834' target="_blank"> 290834 </a>	ADAM metallopeptidase domain 9	protein_coding	protein_coding	0.285073	1.21847	0.0420996	0.148381	Not regulated	43.77	34.86	34.97	31.75	42.97	52.59	37.57
Adamts1	<a href='https://www.ncbi.nlm.nih.gov/gene/?term=79252' target="_blank"> 79252 </a>	ADAM metallopeptidase with thrombospondin type 1 motif, 1	protein_coding	protein_coding	0.537964	1.45192	0.0172553	0.0790022	Not regulated	7.34	8.75	5.85	5.69	9.28	13.9	7.01
Adamts10	<a href='https://www.ncbi.nlm.nih.gov/gene/?term=314655' target="_blank"> 314655 </a>	ADAM metallopeptidase with thrombospondin type 1 motif, 10			0.0493355	1.03479	0.722869	0.857346	Not regulated	11.34	11.08	10.01	8.69	8.99	12.57	11.43
Adamts12	<a href='https://www.ncbi.nlm.nih.gov/gene/?term=294809' target="_blank"> 294809 </a>	ADAM metallopeptidase with thrombospondin type 1 motif, 12	protein_coding	protein_coding	0.502515	1.41668	0.00702793	0.0403699	Up in F_UVB_WT_MG	1.18	1.55	1.68	1.48	1.64	2.23	2.42
Adamts13	<a href='https://www.ncbi.nlm.nih.gov/gene/?term=102554393' target="_blank"> 102554393 </a>	ADAM metallopeptidase with thrombospondin type 1 motif, 13	protein_coding	protein_coding	-0.106465	-1.07659	0.384688	0.606778	Not regulated	5.35	6.77	5.81	6.73	5.93	6.08	5.22
Adamts14	<a href='https://www.ncbi.nlm.nih.gov/gene/?term=309837' target="_blank"> 309837 </a>	ADAM metallopeptidase with thrombospondin type 1 motif, 14	protein_coding	protein_coding	-0.152605	-1.11157	0.666982	0.822581	Not regulated	0.4	0.61	0.76	0.71	0.57	0.66	0.45
Adamts15	<a href='https://www.ncbi.nlm.nih.gov/gene/?term=300474' target="_blank"> 300474 </a>	ADAM metallopeptidase with thrombospondin type 1 motif, 15	protein_coding	protein_coding	0.158236	1.11592	0.498937	0.70719	Not regulated	2.58	2.79	2.14	1.47	1.94	2.9	2.72
Adamts17	<a href='https://www.ncbi.nlm.nih.gov/gene/?term=293004' target="_blank"> 293004 </a>	ADAM metallopeptidase with thrombospondin type 1 motif, 17	protein_coding	protein_coding	-1.15191	-2.22208	9.05251e-05	0.00133159	Down in F_UVB_WT_MG	1.06	1.47	1.22	1.07	0.33	0.79	0.55
Adamts18	<a href='https://www.ncbi.nlm.nih.gov/gene/?term=361412' target="_blank"> 361412 </a>	ADAM metallopeptidase with thrombospondin type 1 motif, 18	protein_coding	protein_coding	0.489079	1.40355	0.0554467	0.179467	Not regulated	0.71	0.78	0.74	0.69	0.98	0.95	1.15
Adamts19	<a href='https://www.ncbi.nlm.nih.gov/gene/?term=361332' target="_blank"> 361332 </a>	ADAM metallopeptidase with thrombospondin type 1 motif, 19	protein_coding	protein_coding	-0.990763	-1.98724	0.0120418	0.0608405	Not regulated	0.6	0.64	0.46	0.36	0.21	0.25	0.32
Adamts2	<a href='https://www.ncbi.nlm.nih.gov/gene/?term=287899' target="_blank"> 287899 </a>	ADAM metallopeptidase with thrombospondin type 1 motif, 2	protein_coding	protein_coding	-0.00710188	-1.00493	0.967244	0.985776	Not regulated	16.07	17.98	17.02	12.75	11.74	19.5	16.59
Adamts20	<a href='https://www.ncbi.nlm.nih.gov/gene/?term=315263' target="_blank"> 315263 </a>	ADAM metallopeptidase with thrombospondin type 1 motif, 20	protein_coding	protein_coding	-0.479226	-1.394	0.162723	0.361251	Not regulated	0.31	0.52	0.5	0.37	0.27	0.37	0.28
Adamts3	<a href='https://www.ncbi.nlm.nih.gov/gene/?term=305253' target="_blank"> 305253 </a>	ADAM metallopeptidase with thrombospondin type 1, motif 3	protein_coding	protein_coding	0.408388	1.3272	0.399798	0.619895	Not regulated	0.26	0.31	0.27	0.11	0.27	0.3	0.39
Adamts4	<a href='https://www.ncbi.nlm.nih.gov/gene/?term=66015' target="_blank"> 66015 </a>	ADAM metallopeptidase with thrombospondin type 1 motif, 4	protein_coding	protein_coding	1.48352	2.7963	4.7752e-07	1.64937e-05	Up in F_UVB_WT_MG	0.49	0.67	0.92	0.55	1.72	2.31	1.53
Adamts5	<a href='https://www.ncbi.nlm.nih.gov/gene/?term=304135' target="_blank"> 304135 </a>	ADAM metallopeptidase with thrombospondin type 1 motif, 5	protein_coding	protein_coding	0.65848	1.57842	0.00335109	0.0231892	Up in F_UVB_WT_MG	1.68	1.84	2.12	1.34	2.3	3.47	2.56
Adamts6	<a href='https://www.ncbi.nlm.nih.gov/gene/?term=361886' target="_blank"> 361886 </a>	ADAM metallopeptidase with thrombospondin type 1 motif, 6	protein_coding	protein_coding	0.140833	1.10254	0.70951	0.848806	Not regulated	0.39	0.37	0.29	0.43	0.34	0.26	0.61
Adamts7	<a href='https://www.ncbi.nlm.nih.gov/gene/?term=315879' target="_blank"> 315879 </a>	ADAM metallopeptidase with thrombospondin type 1 motif, 7	protein_coding	protein_coding	1.25174	2.38129	3.30971e-06	8.67206e-05	Up in F_UVB_WT_MG	0.72	0.74	0.75	0.95	1.31	2.57	1.74
Adamts8	<a href='https://www.ncbi.nlm.nih.gov/gene/?term=300475' target="_blank"> 300475 </a>	ADAM metallopeptidase with thrombospondin type 1 motif, 8	protein_coding	protein_coding	0.599017	1.51468	0.049751	0.166857	Not regulated	0.71	0.93	0.78	0.5	1.02	1.01	1.3
Adamts9	<a href='https://www.ncbi.nlm.nih.gov/gene/?term=312566' target="_blank"> 312566 </a>	ADAM metallopeptidase with thrombospondin type 1 motif, 9	protein_coding	protein_coding	0.424266	1.34189	0.0902938	0.247502	Not regulated	2.2	2.81	1.87	1.38	3.1	2.83	1.99
Adamtsl2	<a href='https://www.ncbi.nlm.nih.gov/gene/?term=311827' target="_blank"> 311827 </a>	ADAMTS-like 2	protein_coding	protein_coding	0.248285	1.18779	0.336818	0.56269	Not regulated	1.17	1.45	0.82	1.19	1.29	1.27	1.57
Adamtsl3	<a href='https://www.ncbi.nlm.nih.gov/gene/?term=308787' target="_blank"> 308787 </a>	ADAMTS-like 3	protein_coding	protein_coding	-1.10288	-2.14784	0.0006232	0.00616157	Down in F_UVB_WT_MG	0.37	0.48	0.44	0.49	0.15	0.25	0.23
Adamtsl4	<a href='https://www.ncbi.nlm.nih.gov/gene/?term=310670' target="_blank"> 310670 </a>	ADAMTS-like 4	protein_coding	protein_coding	-0.469066	-1.38421	0.000567725	0.00574552	Not regulated	13.75	15.2	11.77	10.94	8.41	10.66	9.01
Adamtsl5	<a href='https://www.ncbi.nlm.nih.gov/gene/?term=314626' target="_blank"> 314626 </a>	ADAMTS-like 5	protein_coding	protein_coding	0.672206	1.59351	0.000531416	0.00545697	Up in F_UVB_WT_MG	6.37	5.85	5.52	4.21	7.6	10.88	7.92
Adap1	<a href='https://www.ncbi.nlm.nih.gov/gene/?term=171097' target="_blank"> 171097 </a>	ArfGAP with dual PH domains 1	protein_coding	protein_coding	-0.109094	-1.07855	0.489687	0.698998	Not regulated	7.76	6.96	7.11	5.74	5.52	7.08	6.56
Adap2	<a href='https://www.ncbi.nlm.nih.gov/gene/?term=56826' target="_blank"> 56826 </a>	ArfGAP with dual PH domains 2	protein_coding	protein_coding	0.374394	1.2963	0.103014	0.26871	Not regulated	2.35	2.28	2.44	2.37	3.14	3.64	2.43
Adar	<a href='https://www.ncbi.nlm.nih.gov/gene/?term=81635' target="_blank"> 81635 </a>	adenosine deaminase, RNA-specific	protein_coding	protein_coding	-0.0617165	-1.04371	0.601521	0.782071	Not regulated	15.52	15.02	14.65	12.31	11.69	13.37	14.66
Adarb1	<a href='https://www.ncbi.nlm.nih.gov/gene/?term=25367' target="_blank"> 25367 </a>	adenosine deaminase, RNA-specific, B1	protein_coding	protein_coding	0.00389758	1.00271	0.969766	0.986676	Not regulated	7.68	8.38	6.83	7.23	7.13	7.21	8.24
Adat1	<a href='https://www.ncbi.nlm.nih.gov/gene/?term=690810' target="_blank"> 690810 </a>	adenosine deaminase, tRNA-specific 1	protein_coding	protein_coding	0.128947	1.0935	0.631101	0.801412	Not regulated	1.32	1.64	1.27	1.21	1.63	1.16	1.47
Adat2	<a href='https://www.ncbi.nlm.nih.gov/gene/?term=361453' target="_blank"> 361453 </a>	adenosine deaminase, tRNA-specific 2	protein_coding	protein_coding	-0.235076	-1.17697	0.2932	0.51786	Not regulated	6.63	6.92	6.49	5.69	5.39	5.53	5.51
Adck1	<a href='https://www.ncbi.nlm.nih.gov/gene/?term=366698' target="_blank"> 366698 </a>	aarF domain containing kinase 1	protein_coding	protein_coding	0.102951	1.07397	0.418725	0.638628	Not regulated	10.82	10.28	9.89	11	12.21	9.57	11.79
Adck2	<a href='https://www.ncbi.nlm.nih.gov/gene/?term=312258' target="_blank"> 312258 </a>	aarF domain containing kinase 2	protein_coding	protein_coding	0.101219	1.07268	0.189958	0.397699	Not regulated	270.93	287.63	284.32	293.38	327.31	318.46	292.19
Adck5	<a href='https://www.ncbi.nlm.nih.gov/gene/?term=362943' target="_blank"> 362943 </a>	aarF domain containing kinase 5	protein_coding	protein_coding	0.177281	1.13075	0.0751936	0.219426	Not regulated	25.51	27.93	23.98	23.3	30.34	29.01	26.18
Adcy1	<a href='https://www.ncbi.nlm.nih.gov/gene/?term=305509' target="_blank"> 305509 </a>	adenylate cyclase 1	protein_coding	protein_coding	-0.534161	-1.4481	0.0112955	0.0581724	Not regulated	3.75	3.36	2.9	2.66	1.78	1.75	3.02
Adcy10	<a href='https://www.ncbi.nlm.nih.gov/gene/?term=59320' target="_blank"> 59320 </a>	adenylate cyclase 10	protein_coding	protein_coding	0.658641	1.57859	0.0120866	0.0609741	Not regulated	0.66	0.51	0.66	0.56	1.1	0.91	0.82
Adcy2	<a href='https://www.ncbi.nlm.nih.gov/gene/?term=81636' target="_blank"> 81636 </a>	adenylate cyclase 2	protein_coding	protein_coding	-0.559185	-1.47344	0.00504513	0.0319173	Down in F_UVB_WT_MG	3.3	3.54	3.57	2.24	2.24	2.19	2.01
Adcy3	<a href='https://www.ncbi.nlm.nih.gov/gene/?term=64508' target="_blank"> 64508 </a>	adenylate cyclase 3	protein_coding	protein_coding	-0.055242	-1.03903	0.712846	0.850708	Not regulated	7.8	7.1	8.49	6.11	6.03	7.31	8.02
Adcy4	<a href='https://www.ncbi.nlm.nih.gov/gene/?term=54223' target="_blank"> 54223 </a>	adenylate cyclase 4	protein_coding	protein_coding	0.0923973	1.06614	0.625019	0.797689	Not regulated	1.98	2.43	2.05	1.88	1.94	2.34	2.41
Adcy5	<a href='https://www.ncbi.nlm.nih.gov/gene/?term=64532' target="_blank"> 64532 </a>	adenylate cyclase 5	protein_coding	protein_coding	-0.0276029	-1.01932	0.788916	0.89384	Not regulated	4.51	4.64	4.47	4.59	4.17	4.49	4.75
Adcy6	<a href='https://www.ncbi.nlm.nih.gov/gene/?term=25289' target="_blank"> 25289 </a>	adenylate cyclase 6	protein_coding	protein_coding	-0.0548587	-1.03876	0.626555	0.798465	Not regulated	24.28	25.7	22.16	21.38	25.93	20.84	20.74
Adcy7	<a href='https://www.ncbi.nlm.nih.gov/gene/?term=84420' target="_blank"> 84420 </a>	adenylate cyclase 7	protein_coding	protein_coding	0.0537941	1.03799	0.664733	0.821358	Not regulated	5.43	5.96	5.2	6.65	5.6	5.96	6.55
Adcy8	<a href='https://www.ncbi.nlm.nih.gov/gene/?term=29241' target="_blank"> 29241 </a>	adenylate cyclase 8	protein_coding	protein_coding	-0.852396	-1.8055	0.134032	0.318944	Not regulated	0.17	0.45	0.42	0.17	0.12	0.23	0.16
Adcy9	<a href='https://www.ncbi.nlm.nih.gov/gene/?term=302950' target="_blank"> 302950 </a>	adenylate cyclase 9	protein_coding	protein_coding	-0.153917	-1.11259	0.181884	0.386495	Not regulated	2.69	2.74	2.88	2.64	2.3	2.53	2.57
Adcyap1r1	<a href='https://www.ncbi.nlm.nih.gov/gene/?term=24167' target="_blank"> 24167 </a>	ADCYAP receptor type I	protein_coding	protein_coding	0.401125	1.32054	0.143585	0.333461	Not regulated	2.72	2.26	2.42	1.36	1.98	3.94	2.8
Add1	<a href='https://www.ncbi.nlm.nih.gov/gene/?term=24170' target="_blank"> 24170 </a>	adducin 1	protein_coding	protein_coding	-0.134498	-1.09771	0.0248418	0.102911	Not regulated	96	98.93	103.34	94.72	88.06	93.55	87.72
Add3	<a href='https://www.ncbi.nlm.nih.gov/gene/?term=25230' target="_blank"> 25230 </a>	adducin 3	protein_coding	protein_coding	-0.150851	-1.11022	0.0972323	0.259777	Not regulated	29.76	27.81	30.17	26.26	24.35	28.49	24.42
Adgra2	<a href='https://www.ncbi.nlm.nih.gov/gene/?term=100363275' target="_blank"> 100363275 </a>	adhesion G protein-coupled receptor A2			-0.282899	-1.21664	0.00817869	0.0453755	Not regulated	20.41	19.91	20.24	17.07	14.61	18.4	15.02
Adgra3	<a href='https://www.ncbi.nlm.nih.gov/gene/?term=305408' target="_blank"> 305408 </a>	adhesion G protein-coupled receptor A3			-0.374849	-1.2967	6.30424e-05	0.00098166	Not regulated	27.18	22.83	23.31	22.36	18.57	18.44	18.39
Adgrb2	<a href='https://www.ncbi.nlm.nih.gov/gene/?term=313058' target="_blank"> 313058 </a>	adhesion G protein-coupled receptor B2			-0.0539485	-1.0381	0.823271	0.915678	Not regulated	0.96	0.92	1.11	1.4	1.09	0.92	1.11
Adgrd1	<a href='https://www.ncbi.nlm.nih.gov/gene/?term=689257' target="_blank"> 689257 </a>	adhesion G protein-coupled receptor D1			0.248284	1.18779	0.357819	0.581187	Not regulated	1.81	3.41	2.65	1.85	2.87	3.75	2.09
Adgre1	<a href='https://www.ncbi.nlm.nih.gov/gene/?term=316137' target="_blank"> 316137 </a>	adhesion G protein-coupled receptor E1			0.118693	1.08575	0.773543	0.885781	Not regulated	1.41	0.73	0.78	0.71	0.63	1.57	0.83
Adgre5	<a href='https://www.ncbi.nlm.nih.gov/gene/?term=361383' target="_blank"> 361383 </a>	adhesion G protein-coupled receptor E5			0.209156	1.15601	0.270001	0.493535	Not regulated	8.75	10.29	8.64	6.38	7.41	11.66	10.71
Adgrf2	<a href='https://www.ncbi.nlm.nih.gov/gene/?term=301269' target="_blank"> 301269 </a>	adhesion G protein-coupled receptor F2			-0.55154	-1.46565	5.90054e-07	1.94703e-05	Down in F_UVB_WT_MG	17.11	17.25	19.2	15.18	10.71	11.88	12.67
Adgrf4	<a href='https://www.ncbi.nlm.nih.gov/gene/?term=501106' target="_blank"> 501106 </a>	adhesion G protein-coupled receptor F4			-0.124365	-1.09003	0.154014	0.348786	Not regulated	135.31	134.44	135.39	133.84	130.47	109.3	131.21
Adgrf5	<a href='https://www.ncbi.nlm.nih.gov/gene/?term=245977' target="_blank"> 245977 </a>	adhesion G protein-coupled receptor F5			0.0202271	1.01412	0.878153	0.944343	Not regulated	11.56	12.65	11.47	9.54	10.1	10.95	13.46
Adgrg1	<a href='https://www.ncbi.nlm.nih.gov/gene/?term=260326' target="_blank"> 260326 </a>	adhesion G protein-coupled receptor G1			0.244627	1.18479	0.0187775	0.0841318	Not regulated	84.65	81.75	101.68	88.61	112.64	97.23	106.65
Adgrg2	<a href='https://www.ncbi.nlm.nih.gov/gene/?term=266735' target="_blank"> 266735 </a>	adhesion G protein-coupled receptor G2			-0.157063	-1.11502	0.66628	0.822345	Not regulated	0.85	0.49	0.71	0.38	0.44	0.61	0.57
Adgrg3	<a href='https://www.ncbi.nlm.nih.gov/gene/?term=291854' target="_blank"> 291854 </a>	adhesion G protein-coupled receptor G3			0.42	1.33793	0.212887	0.428093	Not regulated	0.64	0.53	0.68	0.56	0.83	0.72	0.85
Adgrg5	<a href='https://www.ncbi.nlm.nih.gov/gene/?term=307645' target="_blank"> 307645 </a>	adhesion G protein-coupled receptor G5			0.862159	1.81776	0.0114721	0.0588272	Not regulated	0.64	0.91	0.72	0.64	0.88	1.43	1.7
Adgrg6	<a href='https://www.ncbi.nlm.nih.gov/gene/?term=308376' target="_blank"> 308376 </a>	adhesion G protein-coupled receptor G6			-0.169419	-1.12461	0.317537	0.542264	Not regulated	10.06	10.63	9.36	14.58	11.31	9.7	8.85
Adgrl1	<a href='https://www.ncbi.nlm.nih.gov/gene/?term=65096' target="_blank"> 65096 </a>	adhesion G protein-coupled receptor L1			-0.0331512	-1.02324	0.75658	0.875533	Not regulated	25.87	30.18	27.95	32.62	30.47	25.94	29.21
Adgrl3	<a href='https://www.ncbi.nlm.nih.gov/gene/?term=170641' target="_blank"> 170641 </a>	adhesion G protein-coupled receptor L3			-0.897406	-1.86271	0.00015556	0.00203917	Down in F_UVB_WT_MG	2.09	1.79	2.1	1.81	0.64	1.22	1.29
Adgrl4	<a href='https://www.ncbi.nlm.nih.gov/gene/?term=64124' target="_blank"> 64124 </a>	adhesion G protein-coupled receptor L4			0.630596	1.5482	0.000216104	0.00266493	Up in F_UVB_WT_MG	4.46	4.19	4.56	2.91	5.77	6.18	6.83
Adgrv1	<a href='https://www.ncbi.nlm.nih.gov/gene/?term=100362255' target="_blank"> 100362255 </a>	adhesion G protein-coupled receptor V1			-1.23218	-2.34922	6.28722e-09	4.20138e-07	Down in F_UVB_WT_MG	8.85	9.81	9.25	7.76	4.43	5.26	3.33
Adh5	<a href='https://www.ncbi.nlm.nih.gov/gene/?term=100145871' target="_blank"> 100145871 </a>	alcohol dehydrogenase 5 (class III), chi polypeptide	protein_coding	protein_coding	0.125506	1.09089	0.0950996	0.255951	Not regulated	62.25	59.47	59.5	55.37	65.63	65.27	62.65
Adh6	<a href='https://www.ncbi.nlm.nih.gov/gene/?term=310903' target="_blank"> 310903 </a>	alcohol dehydrogenase 6 (class V)	protein_coding	protein_coding	-1.0783	-2.11155	2.89349e-05	0.000518567	Down in F_UVB_WT_MG	67.73	45.56	51.15	28.44	21.01	26.41	19.36
Adh6a	<a href='https://www.ncbi.nlm.nih.gov/gene/?term=295498' target="_blank"> 295498 </a>	alcohol dehydrogenase 6A (class V)	protein_coding	protein_coding	-3.22982	-9.3815	1.94974e-12	2.9221e-10	Down in F_UVB_WT_MG	5.96	4	3.18	3.46	0.15	0.7	0.51
Adh7	<a href='https://www.ncbi.nlm.nih.gov/gene/?term=171178' target="_blank"> 171178 </a>	alcohol dehydrogenase 7 (class IV), mu or sigma polypeptide	protein_coding	protein_coding	-0.561504	-1.47581	1.85868e-05	0.000353096	Down in F_UVB_WT_MG	120.07	94.32	123.29	97.85	74.35	66.28	80.52
Adhfe1	<a href='https://www.ncbi.nlm.nih.gov/gene/?term=362474' target="_blank"> 362474 </a>	alcohol dehydrogenase, iron containing, 1	protein_coding	protein_coding	-1.02371	-2.03314	0.00898541	0.0487109	Down in F_UVB_WT_MG	1.01	1.15	1.54	0.96	0.55	0.61	0.56
Adi1	<a href='https://www.ncbi.nlm.nih.gov/gene/?term=298934' target="_blank"> 298934 </a>	acireductone dioxygenase 1	protein_coding	protein_coding	-0.0415094	-1.02919	0.604738	0.78426	Not regulated	65.88	69.27	60.93	69.64	61.99	68.79	63.28
Adipoq	<a href='https://www.ncbi.nlm.nih.gov/gene/?term=246253' target="_blank"> 246253 </a>	adiponectin, C1Q and collagen domain containing	protein_coding	protein_coding	-1.43063	-2.69564	0.00345314	0.0237804	Down in F_UVB_WT_MG	5.41	17.6	3.04	9.01	4.07	1.85	3.81
Adipor1	<a href='https://www.ncbi.nlm.nih.gov/gene/?term=289036' target="_blank"> 289036 </a>	adiponectin receptor 1	protein_coding	protein_coding	-0.0980019	-1.07029	0.16645	0.366648	Not regulated	138.08	135.19	132.81	123.33	119.46	120.06	131.81
Adipor2	<a href='https://www.ncbi.nlm.nih.gov/gene/?term=312670' target="_blank"> 312670 </a>	adiponectin receptor 2	protein_coding	protein_coding	0.194918	1.14466	0.344263	0.569971	Not regulated	343.77	466.84	308.66	481.7	525.41	313.04	533.16
Adk	<a href='https://www.ncbi.nlm.nih.gov/gene/?term=25368' target="_blank"> 25368 </a>	adenosine kinase	protein_coding	protein_coding	-0.0829613	-1.05919	0.324825	0.550718	Not regulated	33.1	36.15	33.12	31.67	32.29	30.58	32.52
Adm	<a href='https://www.ncbi.nlm.nih.gov/gene/?term=25026' target="_blank"> 25026 </a>	adrenomedullin	protein_coding	protein_coding	0.144373	1.10525	0.634304	0.803563	Not regulated	7.49	5.66	10.27	14.53	12.4	9.38	9.69
Adm2	<a href='https://www.ncbi.nlm.nih.gov/gene/?term=399475' target="_blank"> 399475 </a>	adrenomedullin 2	protein_coding	protein_coding	0.501435	1.41562	0.0860873	0.239546	Not regulated	3.97	2.43	2.42	3.91	6.13	3.5	3.82
Adnp	<a href='https://www.ncbi.nlm.nih.gov/gene/?term=64622' target="_blank"> 64622 </a>	activity-dependent neuroprotector homeobox	protein_coding	protein_coding	-0.134155	-1.09745	0.0341267	0.128415	Not regulated	25.62	26.17	26.56	24.48	23.46	22.87	24.02
Adnp2	<a href='https://www.ncbi.nlm.nih.gov/gene/?term=307236' target="_blank"> 307236 </a>	ADNP homeobox 2	protein_coding	protein_coding	-0.271382	-1.20696	0.00690671	0.0398888	Not regulated	10.32	10.28	9.68	9.17	7.38	8.52	8.78
Adora1	<a href='https://www.ncbi.nlm.nih.gov/gene/?term=29290' target="_blank"> 29290 </a>	adenosine A1 receptor	protein_coding	protein_coding	-0.379087	-1.30052	0.389154	0.610472	Not regulated	0.22	0.47	0.36	0.32	0.35	0.21	0.21
Adora2a	<a href='https://www.ncbi.nlm.nih.gov/gene/?term=25369' target="_blank"> 25369 </a>	adenosine A2a receptor	protein_coding	protein_coding	0.860195	1.81528	0.0387537	0.140116	Not regulated	0.44	0.29	0.37	0.47	0.67	0.69	0.76
Adora2b	<a href='https://www.ncbi.nlm.nih.gov/gene/?term=29316' target="_blank"> 29316 </a>	adenosine A2B receptor	protein_coding	protein_coding	-0.117573	-1.08491	0.671183	0.824364	Not regulated	2.09	2.01	2.26	2.63	2.64	1.76	1.77
Adpgk	<a href='https://www.ncbi.nlm.nih.gov/gene/?term=315722' target="_blank"> 315722 </a>	ADP-dependent glucokinase	protein_coding	protein_coding	-0.0555723	-1.03927	0.472264	0.683809	Not regulated	46.04	51.96	50.8	52.61	48.15	47.01	50.35
Adprh	<a href='https://www.ncbi.nlm.nih.gov/gene/?term=25371' target="_blank"> 25371 </a>	ADP-ribosylarginine hydrolase	protein_coding	protein_coding	0.102642	1.07374	0.338294	0.564092	Not regulated	18.03	17.96	19.76	19.43	17.66	21.91	21.16
Adprhl2	<a href='https://www.ncbi.nlm.nih.gov/gene/?term=NA' target="_blank"> NA </a>		protein_coding	protein_coding	0.0435548	1.03065	0.658282	0.816969	Not regulated	69.96	69.74	66.06	74	80.02	65.69	70.45
Adprm	<a href='https://www.ncbi.nlm.nih.gov/gene/?term=287406' target="_blank"> 287406 </a>	ADP-ribose/CDP-alcohol diphosphatase, manganese-dependent	protein_coding	protein_coding	0.194565	1.14438	0.144736	0.335256	Not regulated	9.66	9.32	10.55	9.39	10.62	11.22	11.32
Adra1a	<a href='https://www.ncbi.nlm.nih.gov/gene/?term=29412' target="_blank"> 29412 </a>	adrenoceptor alpha 1A	protein_coding	protein_coding	-0.610145	-1.52641	0.0157472	0.0738718	Not regulated	2.26	3.47	2.42	2.11	1.51	2.06	1.51
Adra1b	<a href='https://www.ncbi.nlm.nih.gov/gene/?term=24173' target="_blank"> 24173 </a>	adrenoceptor alpha 1B			-0.874668	-1.83359	0.049824	0.166976	Not regulated	0.57	0.74	0.72	0.56	0.23	0.36	0.47
Adra1d	<a href='https://www.ncbi.nlm.nih.gov/gene/?term=29413' target="_blank"> 29413 </a>	adrenoceptor alpha 1D	protein_coding	protein_coding	-0.173446	-1.12775	0.624678	0.797679	Not regulated	0.97	0.78	1.08	0.73	0.56	0.71	1.09
Adra2a	<a href='https://www.ncbi.nlm.nih.gov/gene/?term=25083' target="_blank"> 25083 </a>	adrenoceptor alpha 2A	protein_coding	protein_coding	0.253402	1.19201	0.271574	0.495261	Not regulated	2.1	2.22	1.58	1.52	1.78	2.82	2.08
Adra2c	<a href='https://www.ncbi.nlm.nih.gov/gene/?term=24175' target="_blank"> 24175 </a>	adrenoceptor alpha 2C	protein_coding	protein_coding	-0.0597346	-1.04227	0.836615	0.922714	Not regulated	3.25	2.42	4.26	2.74	3.72	2.38	2.98
Adrb1	<a href='https://www.ncbi.nlm.nih.gov/gene/?term=24925' target="_blank"> 24925 </a>	adrenoceptor beta 1	protein_coding	protein_coding	-1.26573	-2.40448	0.0386121	0.139832	Not regulated	0.48	0.23	0.42	0.16	0.1	0.13	0.18
Adrb2	<a href='https://www.ncbi.nlm.nih.gov/gene/?term=24176' target="_blank"> 24176 </a>	adrenoceptor beta 2	protein_coding	protein_coding	-0.747791	-1.67922	2.544e-05	0.000467728	Down in F_UVB_WT_MG	20.09	14.91	16.61	13.77	9.34	11.51	8.47
Adrm1	<a href='https://www.ncbi.nlm.nih.gov/gene/?term=65138' target="_blank"> 65138 </a>	ADRM1 26S proteasome ubiquitin receptor	protein_coding	protein_coding	0.148939	1.10875	0.195872	0.404708	Not regulated	200.92	224.13	200.28	255.6	270.41	227.37	234.87
Adsl	<a href='https://www.ncbi.nlm.nih.gov/gene/?term=315150' target="_blank"> 315150 </a>	adenylosuccinate lyase	protein_coding	protein_coding	-0.0721059	-1.05125	0.364963	0.587777	Not regulated	41.46	43.23	40.53	38.57	39	40.3	36.56
Adss	<a href='https://www.ncbi.nlm.nih.gov/gene/?term=289276' target="_blank"> 289276 </a>	adenylosuccinate synthase	protein_coding	protein_coding	0.180115	1.13297	0.0159631	0.0745354	Not regulated	46.25	45.09	44.05	41.75	45.31	53.95	52.45
Adssl1	<a href='https://www.ncbi.nlm.nih.gov/gene/?term=684425' target="_blank"> 684425 </a>	adenylosuccinate synthase like 1	protein_coding	protein_coding	-0.475156	-1.39007	0.0131512	0.0647962	Not regulated	41.86	52.26	47.68	39.58	30.36	44.26	23.42
Adtrp	<a href='https://www.ncbi.nlm.nih.gov/gene/?term=361228' target="_blank"> 361228 </a>	androgen-dependent TFPI-regulating protein	protein_coding	protein_coding	-0.571508	-1.48608	1.58188e-08	9.51848e-07	Down in F_UVB_WT_MG	1933.11	1703.7	1858.76	1701.85	1274.67	1316.61	1051.42
Aebp1	<a href='https://www.ncbi.nlm.nih.gov/gene/?term=305494' target="_blank"> 305494 </a>	AE binding protein 1	protein_coding	protein_coding	0.435864	1.35272	7.67506e-05	0.00115456	Not regulated	51.01	50.94	51.16	44.93	58.25	79.76	63.6
Aebp2	<a href='https://www.ncbi.nlm.nih.gov/gene/?term=297705' target="_blank"> 297705 </a>	AE binding protein 2	protein_coding	protein_coding	-0.0401093	-1.02819	0.627487	0.798729	Not regulated	36.4	41.08	39.95	42.61	41.23	37.61	41.1
Aen	<a href='https://www.ncbi.nlm.nih.gov/gene/?term=361594' target="_blank"> 361594 </a>	apoptosis enhancing nuclease	protein_coding	protein_coding	0.183203	1.1354	0.281653	0.505591	Not regulated	17.25	21.06	21.33	29.33	26.91	24.96	24.03
Afap1	<a href='https://www.ncbi.nlm.nih.gov/gene/?term=140935' target="_blank"> 140935 </a>	actin filament associated protein 1	protein_coding	protein_coding	0.056931	1.04025	0.589292	0.774578	Not regulated	11.5	10.89	11.82	10.75	10.7	13.66	10.6
Afap1l1	<a href='https://www.ncbi.nlm.nih.gov/gene/?term=291565' target="_blank"> 291565 </a>	actin filament associated protein 1-like 1	protein_coding	protein_coding	-0.358758	-1.28232	0.0174448	0.0795272	Not regulated	8.48	7.41	7.9	5.87	5.95	5.65	6.34
Afap1l2	<a href='https://www.ncbi.nlm.nih.gov/gene/?term=292130' target="_blank"> 292130 </a>	actin filament associated protein 1-like 2	protein_coding	protein_coding	-0.265526	-1.20207	0.0286848	0.113493	Not regulated	18.88	15.26	18.96	16.74	13.15	14.69	16.01
Afdn	<a href='https://www.ncbi.nlm.nih.gov/gene/?term=26955' target="_blank"> 26955 </a>	afadin, adherens junction formation factor			-0.355368	-1.27931	0.000186277	0.0023614	Not regulated	73.76	70.45	65.95	58.45	51.25	49.87	56.19
Aff1	<a href='https://www.ncbi.nlm.nih.gov/gene/?term=305152' target="_blank"> 305152 </a>	AF4/FMR2 family, member 1	protein_coding	protein_coding	0.0907345	1.06491	0.304657	0.528894	Not regulated	17.11	17.22	15.17	15.12	18.32	16.77	16.53
Aff3	<a href='https://www.ncbi.nlm.nih.gov/gene/?term=363220' target="_blank"> 363220 </a>	AF4/FMR2 family, member 3	protein_coding	protein_coding	-1.29548	-2.45459	4.18419e-05	0.000699891	Down in F_UVB_WT_MG	5	3.8	3.57	2.11	0.9	1.82	1.69
Aff4	<a href='https://www.ncbi.nlm.nih.gov/gene/?term=303132' target="_blank"> 303132 </a>	AF4/FMR2 family, member 4	protein_coding	protein_coding	-0.0407224	-1.02863	0.55299	0.748428	Not regulated	28.48	31.09	28.87	30.41	28.51	27.52	30.69
Afg3l1	<a href='https://www.ncbi.nlm.nih.gov/gene/?term=361436' target="_blank"> 361436 </a>	AFG3(ATPase family gene 3)-like 1 (S. cerevisiae)	protein_coding	protein_coding	0.0307548	1.02155	0.654862	0.815171	Not regulated	76.26	80.19	82.64	83.19	85.91	80.28	81.66
Afg3l2	<a href='https://www.ncbi.nlm.nih.gov/gene/?term=307350' target="_blank"> 307350 </a>	AFG3 like matrix AAA peptidase subunit 2	protein_coding	protein_coding	0.065381	1.04636	0.550663	0.746932	Not regulated	73.47	84.46	77.17	94.71	90	78.63	90.34
Afmid	<a href='https://www.ncbi.nlm.nih.gov/gene/?term=688283' target="_blank"> 688283 </a>	arylformamidase	protein_coding	protein_coding	0.0544802	1.03848	0.868582	0.940434	Not regulated	2.67	2.51	2.24	1.11	2.17	1.65	2.61
Aftph	<a href='https://www.ncbi.nlm.nih.gov/gene/?term=305544' target="_blank"> 305544 </a>	aftiphilin	protein_coding	protein_coding	-0.0646666	-1.04584	0.263432	0.48729	Not regulated	53.12	53.23	53.57	52.34	52.42	50.6	51.6
Aga	<a href='https://www.ncbi.nlm.nih.gov/gene/?term=290923' target="_blank"> 290923 </a>	aspartylglucosaminidase	protein_coding	protein_coding	-0.0904967	-1.06474	0.561742	0.754092	Not regulated	17.37	16.12	16.83	12.83	12.28	16.37	15.86
Agap1	<a href='https://www.ncbi.nlm.nih.gov/gene/?term=316611' target="_blank"> 316611 </a>	ArfGAP with GTPase domain, ankyrin repeat and PH domain 1	protein_coding	protein_coding	-0.0653941	-1.04637	0.526817	0.729904	Not regulated	17.74	17.86	16.28	14.99	14.64	17.88	15.75
Agap2	<a href='https://www.ncbi.nlm.nih.gov/gene/?term=65218' target="_blank"> 65218 </a>	ArfGAP with GTPase domain, ankyrin repeat and PH domain 2	protein_coding	protein_coding	0.119793	1.08658	0.621046	0.79594	Not regulated	0.98	1.12	0.81	0.77	0.91	1.02	1.07
Agap3	<a href='https://www.ncbi.nlm.nih.gov/gene/?term=362300' target="_blank"> 362300 </a>	ArfGAP with GTPase domain, ankyrin repeat and PH domain 3	protein_coding	protein_coding	0.104095	1.07482	0.130482	0.314225	Not regulated	30.23	31.01	29.05	30.93	33.52	31.14	32.12
Agbl1	<a href='https://www.ncbi.nlm.nih.gov/gene/?term=308724' target="_blank"> 308724 </a>	AGBL carboxypeptidase 1	protein_coding	protein_coding	0.185105	1.1369	0.47276	0.684162	Not regulated	1.61	2.1	1.43	1.6	1.93	2.52	1.26
Agbl2	<a href='https://www.ncbi.nlm.nih.gov/gene/?term=366124' target="_blank"> 366124 </a>	AGBL carboxypeptidase 2	protein_coding	protein_coding	-0.287335	-1.22038	0.598755	0.779805	Not regulated	0.27	0.35	0.46	0.21	0.24	0.42	0.18
Agbl3	<a href='https://www.ncbi.nlm.nih.gov/gene/?term=500076' target="_blank"> 500076 </a>	AGBL carboxypeptidase 3	protein_coding	protein_coding	-0.43136	-1.3485	0.307482	0.531835	Not regulated	1.18	0.52	0.68	0.89	0.68	0.58	0.89
Agbl5	<a href='https://www.ncbi.nlm.nih.gov/gene/?term=362710' target="_blank"> 362710 </a>	AGBL carboxypeptidase 5	protein_coding	protein_coding	0.0694444	1.04931	0.648369	0.812018	Not regulated	2.74	3.34	3.13	3.08	3.48	3.05	3.12
Ager	<a href='https://www.ncbi.nlm.nih.gov/gene/?term=81722' target="_blank"> 81722 </a>	advanced glycosylation end product-specific receptor	protein_coding	protein_coding	0.295141	1.227	0.330757	0.556777	Not regulated	2.89	1.63	1.58	2.33	2.27	2.98	2.68
Agfg1	<a href='https://www.ncbi.nlm.nih.gov/gene/?term=363266' target="_blank"> 363266 </a>	ArfGAP with FG repeats 1	protein_coding	protein_coding	0.0225803	1.01577	0.830745	0.919844	Not regulated	21.17	22.37	24.9	26.59	23.02	24.91	24.63
Agfg2	<a href='https://www.ncbi.nlm.nih.gov/gene/?term=304375' target="_blank"> 304375 </a>	ArfGAP with FG repeats 2	protein_coding	protein_coding	-0.134072	-1.09739	0.206092	0.418925	Not regulated	14.22	15.07	14.27	13.69	13.43	14.15	11.46
Aggf1	<a href='https://www.ncbi.nlm.nih.gov/gene/?term=310005' target="_blank"> 310005 </a>	angiogenic factor with G patch and FHA domains 1	protein_coding	protein_coding	-0.0849625	-1.06066	0.452129	0.667897	Not regulated	16.19	14.67	18.06	17.12	16.16	14.51	16.03
Agk	<a href='https://www.ncbi.nlm.nih.gov/gene/?term=502749' target="_blank"> 502749 </a>	acylglycerol kinase	protein_coding	protein_coding	-0.0800328	-1.05704	0.424076	0.64326	Not regulated	13.39	13.02	13.16	12.1	11.94	13.28	11.57
Agl	<a href='https://www.ncbi.nlm.nih.gov/gene/?term=362029' target="_blank"> 362029 </a>	amylo-alpha-1, 6-glucosidase, 4-alpha-glucanotransferase	protein_coding	protein_coding	-0.0706072	-1.05016	0.502443	0.71057	Not regulated	13.63	16.74	14.92	13.85	13.7	15.96	12.69
Ago1	<a href='https://www.ncbi.nlm.nih.gov/gene/?term=313594' target="_blank"> 313594 </a>	argonaute RISC component 1	protein_coding	protein_coding	-0.0838517	-1.05984	0.256291	0.479281	Not regulated	16.67	17.91	17.38	15.75	16.47	16.03	15.36
Ago2	<a href='https://www.ncbi.nlm.nih.gov/gene/?term=59117' target="_blank"> 59117 </a>	argonaute RISC catalytic component 2	protein_coding	protein_coding	0.258572	1.19629	0.0542921	0.176782	Not regulated	11.82	14.3	9.75	11.06	13.67	14.18	14.34
Ago3	<a href='https://www.ncbi.nlm.nih.gov/gene/?term=313593' target="_blank"> 313593 </a>	argonaute RISC catalytic component 3	protein_coding	protein_coding	-0.0172583	-1.01203	0.921162	0.963777	Not regulated	3.38	2.9	2.97	3.12	3.42	2.43	2.81
Ago4	<a href='https://www.ncbi.nlm.nih.gov/gene/?term=298533' target="_blank"> 298533 </a>	argonaute RISC component 4	protein_coding	protein_coding	-0.459012	-1.3746	0.00122214	0.0104514	Not regulated	4.65	4.65	4.54	3.88	3.14	3.04	3.51
Agpat1	<a href='https://www.ncbi.nlm.nih.gov/gene/?term=406165' target="_blank"> 406165 </a>	1-acylglycerol-3-phosphate O-acyltransferase 1	protein_coding	protein_coding	0.622173	1.53919	6.75538e-06	0.000153561	Up in F_UVB_WT_MG	22.38	26.15	20.73	17.98	37.07	34.83	28.86
Agpat2	<a href='https://www.ncbi.nlm.nih.gov/gene/?term=311821' target="_blank"> 311821 </a>	1-acylglycerol-3-phosphate O-acyltransferase 2	protein_coding	protein_coding	0.0947184	1.06786	0.532272	0.733336	Not regulated	91.99	99.63	71.22	110.13	109.39	86.96	102.15
Agpat3	<a href='https://www.ncbi.nlm.nih.gov/gene/?term=294324' target="_blank"> 294324 </a>	1-acylglycerol-3-phosphate O-acyltransferase 3	protein_coding	protein_coding	0.217312	1.16257	0.0995442	0.263326	Not regulated	166.98	139.08	161.19	184.68	159.57	190.15	220.62
Agpat4	<a href='https://www.ncbi.nlm.nih.gov/gene/?term=170919' target="_blank"> 170919 </a>	1-acylglycerol-3-phosphate O-acyltransferase 4	protein_coding	protein_coding	0.466414	1.38167	0.00178106	0.0141104	Not regulated	11.74	12.77	11.52	10.23	12.92	16.52	18.62
Agpat5	<a href='https://www.ncbi.nlm.nih.gov/gene/?term=306582' target="_blank"> 306582 </a>	1-acylglycerol-3-phosphate O-acyltransferase 5	protein_coding	protein_coding	0.0893259	1.06387	0.371057	0.593222	Not regulated	14.26	15.74	12.77	14.75	14.92	15.76	15.31
Agps	<a href='https://www.ncbi.nlm.nih.gov/gene/?term=84114' target="_blank"> 84114 </a>	alkylglycerone phosphate synthase	protein_coding	protein_coding	0.295887	1.22764	0.0256166	0.105009	Not regulated	7.59	7.14	7.13	7.05	7.72	9.53	9.41
Agr2	<a href='https://www.ncbi.nlm.nih.gov/gene/?term=298961' target="_blank"> 298961 </a>	anterior gradient 2, protein disulphide isomerase family member	protein_coding	protein_coding	1.97585	3.93361	0.00261228	0.0190438	Up in F_UVB_WT_MG	2.03	0.58	1.84	0.67	2.05	10.41	2.82
Agrn	<a href='https://www.ncbi.nlm.nih.gov/gene/?term=25592' target="_blank"> 25592 </a>	agrin	protein_coding	protein_coding	-0.200838	-1.14937	0.0224069	0.0953492	Not regulated	24.83	24.95	24.24	20.89	19.13	20.76	22.15
Agt	<a href='https://www.ncbi.nlm.nih.gov/gene/?term=24179' target="_blank"> 24179 </a>	angiotensinogen	protein_coding	protein_coding	-0.200352	-1.14898	0.620384	0.795353	Not regulated	1.16	3.49	1.78	1.52	1.4	1.64	2.17
Agtpbp1	<a href='https://www.ncbi.nlm.nih.gov/gene/?term=290986' target="_blank"> 290986 </a>	ATP/GTP binding carboxypeptidase 1	protein_coding	protein_coding	0.04093	1.02878	0.674798	0.82621	Not regulated	10.09	9.66	9.47	11.34	10.51	10.71	10.24
Agtrap	<a href='https://www.ncbi.nlm.nih.gov/gene/?term=298646' target="_blank"> 298646 </a>	angiotensin II receptor-associated protein	protein_coding	protein_coding	0.193722	1.14371	0.0643235	0.197957	Not regulated	25.3	26.08	22.93	27.74	31.69	27.72	28.12
Ahctf1	<a href='https://www.ncbi.nlm.nih.gov/gene/?term=360886' target="_blank"> 360886 </a>	AT hook containing transcription factor 1	protein_coding	protein_coding	0.203382	1.15139	0.0267184	0.108038	Not regulated	14.6	14.22	13.4	13.97	15.72	14.76	18.08
Ahcy	<a href='https://www.ncbi.nlm.nih.gov/gene/?term=29443' target="_blank"> 29443 </a>	adenosylhomocysteinase	protein_coding	protein_coding	0.429712	1.34696	2.61932e-11	3.16652e-09	Not regulated	40.45	40.42	41.21	39.28	53.16	54.75	55.33
Ahcyl1	<a href='https://www.ncbi.nlm.nih.gov/gene/?term=362013' target="_blank"> 362013 </a>	adenosylhomocysteinase-like 1	protein_coding	protein_coding	0.0483379	1.03407	0.480751	0.690541	Not regulated	74.84	73.89	71.65	75.52	79.37	72.07	77.95
Ahcyl2	<a href='https://www.ncbi.nlm.nih.gov/gene/?term=312192' target="_blank"> 312192 </a>	adenosylhomocysteinase-like 2	protein_coding	protein_coding	0.340339	1.26605	0.000656555	0.00640618	Not regulated	9.74	8.75	9.08	8.98	10.12	11.58	12.38
Ahdc1	<a href='https://www.ncbi.nlm.nih.gov/gene/?term=362617' target="_blank"> 362617 </a>	AT hook, DNA binding motif, containing 1	protein_coding	protein_coding	0.0630486	1.04467	0.473284	0.68425	Not regulated	13.38	13.74	14.8	14.8	14.57	16.03	13.74
Ahi1	<a href='https://www.ncbi.nlm.nih.gov/gene/?term=308923' target="_blank"> 308923 </a>	Abelson helper integration site 1	protein_coding	protein_coding	0.0813703	1.05802	0.571244	0.760705	Not regulated	5.36	5.38	4.75	5.62	4.86	6.27	6.34
Ahnak	<a href='https://www.ncbi.nlm.nih.gov/gene/?term=191572' target="_blank"> 191572 </a>	AHNAK nucleoprotein	protein_coding	protein_coding	-0.429154	-1.34644	1.66976e-05	0.000321805	Not regulated	141.34	146.19	136.3	123.44	102.22	105.43	105.72
Ahr	<a href='https://www.ncbi.nlm.nih.gov/gene/?term=25690' target="_blank"> 25690 </a>	aryl hydrocarbon receptor	protein_coding	protein_coding	-0.410216	-1.32888	0.000508225	0.00526764	Not regulated	20.74	17.65	19.63	16.09	13.56	12.93	15.37
Ahrr	<a href='https://www.ncbi.nlm.nih.gov/gene/?term=498999' target="_blank"> 498999 </a>	aryl-hydrocarbon receptor repressor	protein_coding	protein_coding	-0.374882	-1.29673	0.136083	0.322046	Not regulated	1.06	1.24	1.44	0.93	0.73	1.04	0.95
Ahsa1	<a href='https://www.ncbi.nlm.nih.gov/gene/?term=681996' target="_blank"> 681996 </a>	activator of Hsp90 ATPase activity 1	protein_coding	protein_coding	0.157695	1.1155	0.0302349	0.117631	Not regulated	120.1	129.25	120.55	133.03	143.99	143.83	133.48
Ahsa2	<a href='https://www.ncbi.nlm.nih.gov/gene/?term=305577' target="_blank"> 305577 </a>	activator of HSP90 ATPase homolog 2	protein_coding	protein_coding	0.465569	1.38086	0.00660069	0.0385373	Not regulated	9.83	13.5	11.38	11.97	20.05	15.11	14.59
Aida	<a href='https://www.ncbi.nlm.nih.gov/gene/?term=682999' target="_blank"> 682999 </a>	axin interactor, dorsalization associated	protein_coding	protein_coding	0.186582	1.13806	0.0924927	0.251168	Not regulated	16.75	17.08	17.04	13.63	16.33	19.79	19.63
Aif1	<a href='https://www.ncbi.nlm.nih.gov/gene/?term=29427' target="_blank"> 29427 </a>	allograft inflammatory factor 1	retained_intron	protein_coding	0.585728	1.5008	0.136624	0.322933	Not regulated	10.02	6.34	5.63	4.49	4.6	14.67	11.99
Aif1l	<a href='https://www.ncbi.nlm.nih.gov/gene/?term=362107' target="_blank"> 362107 </a>	allograft inflammatory factor 1-like	protein_coding	protein_coding	-0.333551	-1.26011	0.0399019	0.142908	Not regulated	15.72	11.25	15.17	12.99	9.93	9.99	12.93
Aifm1	<a href='https://www.ncbi.nlm.nih.gov/gene/?term=83533' target="_blank"> 83533 </a>	apoptosis inducing factor, mitochondria associated 1	protein_coding	protein_coding	0.196174	1.14566	0.0355231	0.132205	Not regulated	48.47	47.66	43.55	52.02	58.76	54.14	51.86
Aifm2	<a href='https://www.ncbi.nlm.nih.gov/gene/?term=361843' target="_blank"> 361843 </a>	apoptosis inducing factor, mitochondria associated 2	protein_coding	protein_coding	-0.181277	-1.13389	0.174397	0.37726	Not regulated	7.83	7.86	6.94	6.22	6.29	6.93	5.99
Aifm3	<a href='https://www.ncbi.nlm.nih.gov/gene/?term=303786' target="_blank"> 303786 </a>	apoptosis inducing factor, mitochondria associated 3	protein_coding	protein_coding	-0.337033	-1.26316	0.304845	0.529151	Not regulated	0.74	0.89	1.06	0.96	0.62	0.78	0.83
Aig1	<a href='https://www.ncbi.nlm.nih.gov/gene/?term=292486' target="_blank"> 292486 </a>	androgen-induced 1	protein_coding	protein_coding	-0.0661304	-1.0469	0.560271	0.753107	Not regulated	74.54	78.18	71	73.45	73.34	70.23	57.2
Aimp1	<a href='https://www.ncbi.nlm.nih.gov/gene/?term=114632' target="_blank"> 114632 </a>	aminoacyl tRNA synthetase complex-interacting multifunctional protein 1	protein_coding	protein_coding	0.121215	1.08765	0.128783	0.311884	Not regulated	74.44	74.97	70.35	76.52	74.04	83.44	82.87
Aimp2	<a href='https://www.ncbi.nlm.nih.gov/gene/?term=288480' target="_blank"> 288480 </a>	aminoacyl tRNA synthetase complex-interacting multifunctional protein 2	protein_coding	protein_coding	0.186979	1.13838	0.0685319	0.206624	Not regulated	32.62	37.72	32.28	35.76	39.67	42.22	36.58
Aip	<a href='https://www.ncbi.nlm.nih.gov/gene/?term=282827' target="_blank"> 282827 </a>	aryl-hydrocarbon receptor-interacting protein	protein_coding	protein_coding	-0.0154188	-1.01074	0.877635	0.944238	Not regulated	40.63	40.4	36.91	39.51	39.84	42.44	34.92
Ajm1	<a href='https://www.ncbi.nlm.nih.gov/gene/?term=362083' target="_blank"> 362083 </a>	apical junction component 1 homolog			0.11217	1.08085	0.130761	0.314441	Not regulated	15.67	15.23	14.83	14.84	16.68	16.41	16.11
Ajuba	<a href='https://www.ncbi.nlm.nih.gov/gene/?term=85265' target="_blank"> 85265 </a>	ajuba LIM protein	protein_coding	protein_coding	-0.0016118	-1.00112	0.98856	0.994313	Not regulated	39.71	34.81	41.01	41.01	38.92	34.83	43.65
Ak2	<a href='https://www.ncbi.nlm.nih.gov/gene/?term=24184' target="_blank"> 24184 </a>	adenylate kinase 2	protein_coding	protein_coding	0.151498	1.11072	0.197955	0.408125	Not regulated	99.82	113.09	103.32	134.98	131.65	127.1	117.65
Ak3	<a href='https://www.ncbi.nlm.nih.gov/gene/?term=26956' target="_blank"> 26956 </a>	adenylate kinase 3	protein_coding	protein_coding	-0.0408876	-1.02875	0.668457	0.823755	Not regulated	124.17	108.06	104.24	99.9	105.36	103.28	109.95
Ak4	<a href='https://www.ncbi.nlm.nih.gov/gene/?term=29223' target="_blank"> 29223 </a>	adenylate kinase 4	protein_coding	protein_coding	-0.257609	-1.1955	0.120281	0.297535	Not regulated	5.24	3.78	4.67	3.84	3.56	3.95	3.51
Ak6	<a href='https://www.ncbi.nlm.nih.gov/gene/?term=102238592' target="_blank"> 102238592 </a>	adenylate kinase 6	protein_coding	protein_coding	0.0635938	1.04507	0.470077	0.681837	Not regulated	83.19	93.65	87.52	97.19	98.93	92.21	89.32
Akap1	<a href='https://www.ncbi.nlm.nih.gov/gene/?term=114124' target="_blank"> 114124 </a>	A-kinase anchoring protein 1	protein_coding	protein_coding	-0.399577	-1.31912	0.000863783	0.00796573	Not regulated	40.71	50.37	48.56	37.84	33.14	37.31	30.5
Akap10	<a href='https://www.ncbi.nlm.nih.gov/gene/?term=360540' target="_blank"> 360540 </a>	A-kinase anchoring protein 10	protein_coding	protein_coding	-0.0345419	-1.02423	0.697147	0.841716	Not regulated	12.36	12.69	12.36	11.8	13.02	11.99	12.45
Akap11	<a href='https://www.ncbi.nlm.nih.gov/gene/?term=498549' target="_blank"> 498549 </a>	A-kinase anchoring protein 11	protein_coding	protein_coding	-0.307347	-1.23743	0.00250452	0.0183803	Not regulated	16.53	19.13	15.6	16.59	12.9	13.2	16.12
Akap12	<a href='https://www.ncbi.nlm.nih.gov/gene/?term=83425' target="_blank"> 83425 </a>	A-kinase anchoring protein 12	protein_coding	protein_coding	-0.439717	-1.35634	0.0451979	0.155915	Not regulated	3.65	4.09	4.2	3.22	2.17	3.99	2.25
Akap13	<a href='https://www.ncbi.nlm.nih.gov/gene/?term=293024' target="_blank"> 293024 </a>	A-kinase anchoring protein 13	protein_coding	protein_coding	-0.25618	-1.19431	0.00700997	0.0402951	Not regulated	20.55	20.15	17.38	16.59	14.1	16.33	16.03
Akap14	<a href='https://www.ncbi.nlm.nih.gov/gene/?term=60332' target="_blank"> 60332 </a>	A-kinase anchoring protein 14	protein_coding	protein_coding	-0.775537	-1.71183	0.00225135	0.0169431	Down in F_UVB_WT_MG	3.01	3.47	2.26	2.96	1.67	1.9	1.64
Akap17a	<a href='https://www.ncbi.nlm.nih.gov/gene/?term=288526' target="_blank"> 288526 </a>	A-kinase anchoring protein 17A	protein_coding	protein_coding	-0.0932368	-1.06676	0.354717	0.578492	Not regulated	32.85	33.93	29.82	28.89	30.74	31.52	26.13
Akap17b	<a href='https://www.ncbi.nlm.nih.gov/gene/?term=313434' target="_blank"> 313434 </a>	A kinase (PRKA) anchor protein 17B	protein_coding	protein_coding	-0.110862	-1.07987	0.627094	0.798611	Not regulated	2.02	1.25	1.6	1.15	1.3	1.36	1.51
Akap2	<a href='https://www.ncbi.nlm.nih.gov/gene/?term=298024' target="_blank"> 298024 </a>	A-kinase anchoring protein 2	protein_coding	protein_coding	0.0485104	1.0342	0.732248	0.862072	Not regulated	7.51	8.6	9.03	7.62	6.69	9.96	8.73
Akap5	<a href='https://www.ncbi.nlm.nih.gov/gene/?term=171026' target="_blank"> 171026 </a>	A-kinase anchoring protein 5	protein_coding	protein_coding	-0.44663	-1.36285	0.468656	0.681039	Not regulated	0.27	0.65	0.35	0.82	0.18	0.15	0.81
Akap6	<a href='https://www.ncbi.nlm.nih.gov/gene/?term=64553' target="_blank"> 64553 </a>	A-kinase anchoring protein 6	protein_coding	protein_coding	0.234726	1.17668	0.311238	0.535634	Not regulated	0.89	1.19	1.28	1.08	1.13	1.85	1.04
Akap7	<a href='https://www.ncbi.nlm.nih.gov/gene/?term=361458' target="_blank"> 361458 </a>	A-kinase anchoring protein 7	protein_coding	protein_coding	-0.0789527	-1.05625	0.588675	0.773996	Not regulated	6.65	6.67	5.51	5.6	5.09	6.57	5.54
Akap8	<a href='https://www.ncbi.nlm.nih.gov/gene/?term=116633' target="_blank"> 116633 </a>	A-kinase anchoring protein 8	protein_coding	protein_coding	-0.0119164	-1.00829	0.882063	0.946358	Not regulated	34.02	35.24	33.4	33.95	34.01	31.13	36.49
Akap8l	<a href='https://www.ncbi.nlm.nih.gov/gene/?term=299569' target="_blank"> 299569 </a>	A-kinase anchoring protein 8 like	protein_coding	protein_coding	0.0288579	1.0202	0.801227	0.90226	Not regulated	52.03	57.72	48.89	44.25	54.59	45.76	54.93
Akap9	<a href='https://www.ncbi.nlm.nih.gov/gene/?term=246150' target="_blank"> 246150 </a>	A-kinase anchoring protein 9	protein_coding	protein_coding	-0.175171	-1.1291	0.015759	0.0738937	Not regulated	18.34	18.9	16.86	17.04	16.56	15.56	15.16
Akip1	<a href='https://www.ncbi.nlm.nih.gov/gene/?term=361624' target="_blank"> 361624 </a>	A-kinase interacting protein 1	protein_coding	protein_coding	-0.10466	-1.07524	0.51167	0.717787	Not regulated	9.68	8.88	8.82	7.39	8.9	8.28	7.11
Akirin1	<a href='https://www.ncbi.nlm.nih.gov/gene/?term=595134' target="_blank"> 595134 </a>	akirin 1	protein_coding	protein_coding	0.085387	1.06097	0.411463	0.631101	Not regulated	21.72	20.89	22.57	21.4	21	22.12	25.84
Akirin2	<a href='https://www.ncbi.nlm.nih.gov/gene/?term=297968' target="_blank"> 297968 </a>	akirin 2	protein_coding	protein_coding	0.0175966	1.01227	0.822587	0.915454	Not regulated	50.36	50.27	52.18	53.47	50.91	50.88	54.93
Akna	<a href='https://www.ncbi.nlm.nih.gov/gene/?term=362530' target="_blank"> 362530 </a>	AT-hook transcription factor	protein_coding	protein_coding	-0.0413562	-1.02908	0.846699	0.928381	Not regulated	2.24	1.83	1.68	1.31	1.54	1.64	1.96
Akr1a1	<a href='https://www.ncbi.nlm.nih.gov/gene/?term=78959' target="_blank"> 78959 </a>	aldo-keto reductase family 1 member A1	protein_coding	protein_coding	0.248155	1.18769	9.65671e-05	0.00139886	Not regulated	331.74	340.08	334.28	337.77	421.23	397.48	379.08
Akr1b1	<a href='https://www.ncbi.nlm.nih.gov/gene/?term=24192' target="_blank"> 24192 </a>	aldo-keto reductase family 1 member B	protein_coding	protein_coding	0.0494485	1.03487	0.70659	0.847118	Not regulated	40.29	35.24	39.09	30.65	33.32	41.49	38.37
Akr1b8	<a href='https://www.ncbi.nlm.nih.gov/gene/?term=286921' target="_blank"> 286921 </a>	aldo-keto reductase family 1, member B8	protein_coding	protein_coding	0.83031	1.77807	0.0601349	0.189141	Not regulated	0.98	1.16	2.24	0.8	2.73	2.52	1.65
Akr1c1	<a href='https://www.ncbi.nlm.nih.gov/gene/?term=307092' target="_blank"> 307092 </a>	aldo-keto reductase family 1, member C1	protein_coding	protein_coding	-0.959163	-1.94418	0.0223416	0.0952239	Not regulated	4.33	1.78	3.53	2.53	1.63	2.04	1
Akr1c12	<a href='https://www.ncbi.nlm.nih.gov/gene/?term=364773' target="_blank"> 364773 </a>	aldo-keto reductase family 1, member C12	protein_coding	protein_coding	-0.180421	-1.13321	0.266098	0.490051	Not regulated	6.19	6.23	5.52	6.67	5.57	5.13	5.56
Akr1c14	<a href='https://www.ncbi.nlm.nih.gov/gene/?term=191574' target="_blank"> 191574 </a>	aldo-keto reductase family 1, member C14	protein_coding	protein_coding	0.412364	1.33087	0.111022	0.282181	Not regulated	3.35	3.21	2.24	1.93	2.98	3.41	4.3
Akr1c15	<a href='https://www.ncbi.nlm.nih.gov/gene/?term=361267' target="_blank"> 361267 </a>	aldo-keto reductase family 1, member C15			-0.443698	-1.36009	0.0768325	0.222161	Not regulated	21.72	14.85	23.99	31.87	16.06	14.07	20.92
Akr1c19	<a href='https://www.ncbi.nlm.nih.gov/gene/?term=307096' target="_blank"> 307096 </a>	aldo-keto reductase family 1, member C19	protein_coding	protein_coding	-1.20283	-2.30191	0.024049	0.100328	Not regulated	5.26	2.11	3.32	2.39	1.11	2.73	0.6
Akr1c2	<a href='https://www.ncbi.nlm.nih.gov/gene/?term=291283' target="_blank"> 291283 </a>	aldo-keto reductase family 1, member C2	protein_coding	protein_coding	0.228319	1.17147	0.281318	0.505383	Not regulated	220.99	379.81	380.81	388.55	423.63	295.1	485.03
Akr1c3	<a href='https://www.ncbi.nlm.nih.gov/gene/?term=171516' target="_blank"> 171516 </a>	aldo-keto reductase family 1, member C3	protein_coding	protein_coding	-0.502467	-1.41663	0.00323923	0.0226712	Down in F_UVB_WT_MG	210.57	205.61	233.7	266.13	209.06	134.35	141.36
Akr1e2	<a href='https://www.ncbi.nlm.nih.gov/gene/?term=307091' target="_blank"> 307091 </a>	aldo-keto reductase family 1, member E2	protein_coding	protein_coding	0.152891	1.1118	0.070004	0.209524	Not regulated	138.34	141.36	126.16	136.6	163.97	147.45	140.87
Akr7a2	<a href='https://www.ncbi.nlm.nih.gov/gene/?term=171445' target="_blank"> 171445 </a>	aldo-keto reductase family 7, member A2	protein_coding	protein_coding	0.28932	1.22206	0.00110304	0.00964382	Not regulated	86.2	96.8	91.27	94.08	115.61	121.51	101.15
Akr7a3	<a href='https://www.ncbi.nlm.nih.gov/gene/?term=26760' target="_blank"> 26760 </a>	aldo-keto reductase family 7 member A3	protein_coding	protein_coding	0.815588	1.76002	0.088616	0.244332	Not regulated	0.52	0.5	0.43	0.6	1.15	0.54	0.98
Akt1	<a href='https://www.ncbi.nlm.nih.gov/gene/?term=24185' target="_blank"> 24185 </a>	AKT serine/threonine kinase 1	protein_coding	protein_coding	0.238811	1.18002	6.10241e-05	0.000955828	Not regulated	90.82	94.83	100.3	95.88	110.34	112.72	113.87
Akt1s1	<a href='https://www.ncbi.nlm.nih.gov/gene/?term=292887' target="_blank"> 292887 </a>	AKT1 substrate 1	protein_coding	protein_coding	0.143219	1.10437	0.105499	0.272625	Not regulated	57.44	61.97	58.12	64.8	70.47	65.51	64.48
Akt2	<a href='https://www.ncbi.nlm.nih.gov/gene/?term=25233' target="_blank"> 25233 </a>	AKT serine/threonine kinase 2	protein_coding	protein_coding	-0.0501244	-1.03535	0.459062	0.673224	Not regulated	94.49	101.16	97.66	92.54	95.03	97.48	87.65
Akt3	<a href='https://www.ncbi.nlm.nih.gov/gene/?term=29414' target="_blank"> 29414 </a>	AKT serine/threonine kinase 3	protein_coding	protein_coding	0.419481	1.33745	0.00125169	0.010663	Not regulated	4.73	4.74	5.36	4.46	6.2	6.67	7.79
Aktip	<a href='https://www.ncbi.nlm.nih.gov/gene/?term=291906' target="_blank"> 291906 </a>	AKT interacting protein	protein_coding	protein_coding	-0.0981114	-1.07037	0.242207	0.462768	Not regulated	131.32	142.93	136.43	140.41	140.69	122.05	121.62
Alad	<a href='https://www.ncbi.nlm.nih.gov/gene/?term=25374' target="_blank"> 25374 </a>	aminolevulinate dehydratase	retained_intron	protein_coding	-0.082392	-1.05877	0.340678	0.566567	Not regulated	118.29	109.12	119.32	122.89	108.95	120	100.65
Alas1	<a href='https://www.ncbi.nlm.nih.gov/gene/?term=65155' target="_blank"> 65155 </a>	5'-aminolevulinate synthase 1	protein_coding	protein_coding	-0.0888027	-1.06349	0.409083	0.628609	Not regulated	45.93	49.53	44.96	56.77	43.88	51.05	44.28
Alas2	<a href='https://www.ncbi.nlm.nih.gov/gene/?term=25748' target="_blank"> 25748 </a>	5'-aminolevulinate synthase 2	protein_coding	protein_coding	0.111941	1.08068	0.814345	0.910014	Not regulated	0.66	0.97	0.45	0.53	0.57	1.03	0.55
Alcam	<a href='https://www.ncbi.nlm.nih.gov/gene/?term=79559' target="_blank"> 79559 </a>	activated leukocyte cell adhesion molecule	protein_coding	protein_coding	0.0103466	1.0072	0.957074	0.980295	Not regulated	61.22	56.62	74.13	42.51	61.5	45.38	71.36
Aldh16a1	<a href='https://www.ncbi.nlm.nih.gov/gene/?term=361571' target="_blank"> 361571 </a>	aldehyde dehydrogenase 16 family, member A1	protein_coding	protein_coding	0.243348	1.18374	0.00051171	0.00529963	Not regulated	37.57	40.66	37.82	40.03	48.03	50.48	46.59
Aldh1a1	<a href='https://www.ncbi.nlm.nih.gov/gene/?term=24188' target="_blank"> 24188 </a>	aldehyde dehydrogenase 1 family, member A1	protein_coding	protein_coding	-0.245037	-1.18512	0.258616	0.481934	Not regulated	22.23	18	18.62	19.62	9	18.51	22.03
Aldh1a2	<a href='https://www.ncbi.nlm.nih.gov/gene/?term=116676' target="_blank"> 116676 </a>	aldehyde dehydrogenase 1 family, member A2	protein_coding	protein_coding	0.778939	1.71587	0.041977	0.148066	Not regulated	1.09	0.75	0.77	0.63	1.01	2.05	1.14
Aldh1a3	<a href='https://www.ncbi.nlm.nih.gov/gene/?term=266603' target="_blank"> 266603 </a>	aldehyde dehydrogenase 1 family, member A3	protein_coding	protein_coding	0.240763	1.18162	0.132302	0.316544	Not regulated	11.94	10.34	10.11	8.45	12.09	9.94	14.12
Aldh1a7	<a href='https://www.ncbi.nlm.nih.gov/gene/?term=29651' target="_blank"> 29651 </a>	aldehyde dehydrogenase family 1, subfamily A7	protein_coding	protein_coding	-0.227206	-1.17057	0.807447	0.905119	Not regulated	48.55	49.64	48.69	56.41	2.62	51.25	77.5
Aldh1l1	<a href='https://www.ncbi.nlm.nih.gov/gene/?term=64392' target="_blank"> 64392 </a>	aldehyde dehydrogenase 1 family, member L1	protein_coding	protein_coding	0.119155	1.0861	0.187936	0.395313	Not regulated	72.98	74.22	70.31	78.45	86.92	82.96	71.39
Aldh1l2	<a href='https://www.ncbi.nlm.nih.gov/gene/?term=299699' target="_blank"> 299699 </a>	aldehyde dehydrogenase 1 family, member L2	protein_coding	protein_coding	0.310902	1.24048	0.0288655	0.114056	Not regulated	4.61	5.74	5.31	5.56	6.32	7.91	5.8
Aldh3a1	<a href='https://www.ncbi.nlm.nih.gov/gene/?term=25375' target="_blank"> 25375 </a>	aldehyde dehydrogenase 3 family, member A1	protein_coding	protein_coding	-0.859606	-1.81454	4.65123e-14	9.66438e-12	Down in F_UVB_WT_MG	429.66	396.89	412.06	337.86	198.1	203.77	250.77
Aldh3a2	<a href='https://www.ncbi.nlm.nih.gov/gene/?term=65183' target="_blank"> 65183 </a>	aldehyde dehydrogenase 3 family, member A2	protein_coding	protein_coding	-0.0823884	-1.05877	0.399363	0.619575	Not regulated	124.81	121.77	113.77	123.08	125.15	122.03	98.26
Aldh3b1	<a href='https://www.ncbi.nlm.nih.gov/gene/?term=309147' target="_blank"> 309147 </a>	aldehyde dehydrogenase 3 family, member B1	protein_coding	protein_coding	0.297631	1.22912	0.484402	0.694285	Not regulated	1.17	0.93	0.82	0.6	0.66	1.63	1.03
Aldh5a1	<a href='https://www.ncbi.nlm.nih.gov/gene/?term=291133' target="_blank"> 291133 </a>	aldehyde dehydrogenase 5 family, member A1	protein_coding	protein_coding	-0.077556	-1.05523	0.396445	0.616672	Not regulated	13.27	14.81	13.67	13.32	12.11	14.53	11.75
Aldh6a1	<a href='https://www.ncbi.nlm.nih.gov/gene/?term=81708' target="_blank"> 81708 </a>	aldehyde dehydrogenase 6 family, member A1	protein_coding	protein_coding	0.0272404	1.01906	0.761174	0.878348	Not regulated	63.75	56.85	58.47	50.93	56.79	57.84	60.76
Aldh7a1	<a href='https://www.ncbi.nlm.nih.gov/gene/?term=291450' target="_blank"> 291450 </a>	aldehyde dehydrogenase 7 family, member A1	protein_coding	protein_coding	0.477572	1.3924	0.000402694	0.00442198	Not regulated	29.33	27.8	27.03	23.22	36.38	44.67	31.6
Aldh9a1	<a href='https://www.ncbi.nlm.nih.gov/gene/?term=64040' target="_blank"> 64040 </a>	aldehyde dehydrogenase 9 family, member A1	protein_coding	protein_coding	0.13947	1.1015	0.261997	0.485524	Not regulated	101.92	112.2	84.17	100.08	115.79	93.43	120.1
Aldoa	<a href='https://www.ncbi.nlm.nih.gov/gene/?term=24189' target="_blank"> 24189 </a>	aldolase, fructose-bisphosphate A	protein_coding	protein_coding	-0.0473279	-1.03335	0.591921	0.775504	Not regulated	1052.03	1175.75	1236.71	1082.18	1127.16	1177.76	1008.25
Aldoc	<a href='https://www.ncbi.nlm.nih.gov/gene/?term=24191' target="_blank"> 24191 </a>	aldolase, fructose-bisphosphate C	protein_coding	protein_coding	-0.181777	-1.13428	0.370851	0.593222	Not regulated	4.24	3.9	3.58	3.89	3.37	3.87	3.24
Alg1	<a href='https://www.ncbi.nlm.nih.gov/gene/?term=360475' target="_blank"> 360475 </a>	ALG1, chitobiosyldiphosphodolichol beta-mannosyltransferase	protein_coding	protein_coding	0.167287	1.12294	0.257039	0.480159	Not regulated	15.02	17.43	15.37	19.03	21.88	17.65	16.69
Alg10	<a href='https://www.ncbi.nlm.nih.gov/gene/?term=245960' target="_blank"> 245960 </a>	ALG10, alpha-1,2-glucosyltransferase	protein_coding	protein_coding	0.244174	1.18441	0.15595	0.350936	Not regulated	9.9	11.92	12	14.83	14.66	11.93	16.61
Alg11	<a href='https://www.ncbi.nlm.nih.gov/gene/?term=361174' target="_blank"> 361174 </a>	ALG11, alpha-1,2-mannosyltransferase	protein_coding	protein_coding	0.227791	1.17104	0.0826987	0.233195	Not regulated	16.98	18.97	20.39	20.98	24.2	19.87	24.17
Alg12	<a href='https://www.ncbi.nlm.nih.gov/gene/?term=315212' target="_blank"> 315212 </a>	ALG12, alpha-1,6-mannosyltransferase	protein_coding	protein_coding	0.158261	1.11594	0.0824793	0.233012	Not regulated	18.44	19.73	18.04	20.54	21.31	21.3	22.23
Alg14	<a href='https://www.ncbi.nlm.nih.gov/gene/?term=362031' target="_blank"> 362031 </a>	ALG14, UDP-N-acetylglucosaminyltransferase subunit	protein_coding	protein_coding	0.0781828	1.05569	0.312926	0.537704	Not regulated	41.9	45.81	42.02	44.07	47.22	46.03	44.53
Alg2	<a href='https://www.ncbi.nlm.nih.gov/gene/?term=313231' target="_blank"> 313231 </a>	ALG2, alpha-1,3/1,6-mannosyltransferase	protein_coding	protein_coding	0.0736526	1.05238	0.537128	0.736475	Not regulated	17.58	21.4	19.29	24.19	21.62	22.52	21.06
Alg3	<a href='https://www.ncbi.nlm.nih.gov/gene/?term=287983' target="_blank"> 287983 </a>	ALG3, alpha-1,3- mannosyltransferase	protein_coding	protein_coding	0.180512	1.13329	0.0734926	0.216314	Not regulated	20.83	21.98	21.87	24.65	26.82	26.42	24.76
Alg5	<a href='https://www.ncbi.nlm.nih.gov/gene/?term=295051' target="_blank"> 295051 </a>	ALG5, dolichyl-phosphate beta-glucosyltransferase	protein_coding	protein_coding	0.101782	1.0731	0.266164	0.490051	Not regulated	33.59	35.16	34.7	36.94	39.32	38.2	35.61
Alg6	<a href='https://www.ncbi.nlm.nih.gov/gene/?term=362547' target="_blank"> 362547 </a>	ALG6, alpha-1,3-glucosyltransferase	protein_coding	protein_coding	-0.162031	-1.11886	0.185951	0.39238	Not regulated	11.03	10.06	10.09	12.41	9.15	10.25	10.01
Alg8	<a href='https://www.ncbi.nlm.nih.gov/gene/?term=293129' target="_blank"> 293129 </a>	ALG8, alpha-1,3-glucosyltransferase	protein_coding	protein_coding	-0.00621444	-1.00432	0.970291	0.986676	Not regulated	13.4	12.54	10.88	11.32	11.06	15.24	9.83
Alg9	<a href='https://www.ncbi.nlm.nih.gov/gene/?term=367083' target="_blank"> 367083 </a>	ALG9, alpha-1,2-mannosyltransferase	protein_coding	protein_coding	0.220108	1.16482	0.0344852	0.129434	Not regulated	18.69	17.64	19.43	20.75	23.39	23.14	20.5
Alkbh1	<a href='https://www.ncbi.nlm.nih.gov/gene/?term=362766' target="_blank"> 362766 </a>	alkB homolog 1, histone H2A dioxygenase	protein_coding	protein_coding	0.130065	1.09434	0.14534	0.335952	Not regulated	9.06	9.96	9.1	9.11	10.36	10.25	10.01
Alkbh2	<a href='https://www.ncbi.nlm.nih.gov/gene/?term=304578' target="_blank"> 304578 </a>	alkB homolog 2, alpha-ketoglutarate-dependent dioxygenase	protein_coding	protein_coding	0.391668	1.31191	0.00478657	0.0305844	Not regulated	14.86	15.96	15.38	17.53	20.34	19.96	22.39
Alkbh3	<a href='https://www.ncbi.nlm.nih.gov/gene/?term=362169' target="_blank"> 362169 </a>	alkB homolog 3, alpha-ketoglutarate-dependent dioxygenase	protein_coding	protein_coding	0.0675477	1.04793	0.615025	0.791656	Not regulated	41.7	47.78	47.91	53.08	56.19	42.3	51.1
Alkbh4	<a href='https://www.ncbi.nlm.nih.gov/gene/?term=288587' target="_blank"> 288587 </a>	alkB homolog 4, lysine demethylase	protein_coding	protein_coding	-0.176037	-1.12978	0.331487	0.55747	Not regulated	8.2	6.28	6.78	7.95	6.36	5.55	7.42
Alkbh5	<a href='https://www.ncbi.nlm.nih.gov/gene/?term=303193' target="_blank"> 303193 </a>	alkB homolog 5, RNA demethylase	protein_coding	protein_coding	0.208615	1.15558	0.07731	0.22296	Not regulated	8.89	11.13	9.31	9.75	11.69	10.25	11.94
Alkbh6	<a href='https://www.ncbi.nlm.nih.gov/gene/?term=292780' target="_blank"> 292780 </a>	alkB homolog 6	protein_coding	protein_coding	-0.113476	-1.08183	0.391577	0.612178	Not regulated	35.66	33.59	29.81	39.33	30.42	36.1	31
Alkbh7	<a href='https://www.ncbi.nlm.nih.gov/gene/?term=679944' target="_blank"> 679944 </a>	alkB homolog 7	protein_coding	protein_coding	0.0187197	1.01306	0.901875	0.954944	Not regulated	12.45	12.09	13.4	12.55	11.46	14.15	13.07
Alkbh8	<a href='https://www.ncbi.nlm.nih.gov/gene/?term=366783' target="_blank"> 366783 </a>	alkB homolog 8, tRNA methyltransferase	protein_coding	protein_coding	0.185476	1.13719	0.327548	0.553742	Not regulated	1.89	2.24	2.49	2.69	2.5	2.74	2.71
Alms1	<a href='https://www.ncbi.nlm.nih.gov/gene/?term=297408' target="_blank"> 297408 </a>	ALMS1, centrosome and basal body associated protein	protein_coding	protein_coding	-0.0770414	-1.05485	0.393605	0.613972	Not regulated	5.07	5.35	4.74	4.86	4.44	5.3	4.61
Alox12	<a href='https://www.ncbi.nlm.nih.gov/gene/?term=287454' target="_blank"> 287454 </a>	arachidonate 12-lipoxygenase, 12S type	protein_coding	protein_coding	0.116761	1.0843	0.467968	0.680533	Not regulated	8.65	7.45	7.32	6.77	6.42	9.32	8.89
Alox12b	<a href='https://www.ncbi.nlm.nih.gov/gene/?term=287425' target="_blank"> 287425 </a>	arachidonate 12-lipoxygenase, 12R type	protein_coding	protein_coding	0.393743	1.3138	0.13229	0.316544	Not regulated	8.57	5.97	8.55	8.12	7.3	8.27	15.25
Alox12e	<a href='https://www.ncbi.nlm.nih.gov/gene/?term=303252' target="_blank"> 303252 </a>	arachidonate 12-lipoxygenase, epidermal	protein_coding	protein_coding	-2.01816	-4.05066	2.0891e-08	1.20949e-06	Down in F_UVB_WT_MG	57.79	34.66	38.51	28.04	6.14	10.65	12.61
Alox5	<a href='https://www.ncbi.nlm.nih.gov/gene/?term=25290' target="_blank"> 25290 </a>	arachidonate 5-lipoxygenase	protein_coding	protein_coding	0.11333	1.08172	0.781241	0.889025	Not regulated	1.15	0.6	0.94	0.78	0.57	1.38	0.88
Alox5ap	<a href='https://www.ncbi.nlm.nih.gov/gene/?term=29624' target="_blank"> 29624 </a>	arachidonate 5-lipoxygenase activating protein	protein_coding	protein_coding	0.206569	1.15394	0.454235	0.669289	Not regulated	6.94	5.96	6.99	4.38	5.18	9.19	6.82
Aloxe3	<a href='https://www.ncbi.nlm.nih.gov/gene/?term=287424' target="_blank"> 287424 </a>	arachidonate lipoxygenase 3	protein_coding	protein_coding	-0.423192	-1.34089	0.0141553	0.0684749	Not regulated	23.54	28.19	24	33.98	19.24	17.08	25.04
Alpg	<a href='https://www.ncbi.nlm.nih.gov/gene/?term=367308' target="_blank"> 367308 </a>	alkaline phosphatase, germ cell			-1.27972	-2.42793	1.27246e-05	0.000258339	Down in F_UVB_WT_MG	5.93	4.06	5.01	3.08	1.7	1.31	2.51
Alpk1	<a href='https://www.ncbi.nlm.nih.gov/gene/?term=310879' target="_blank"> 310879 </a>	alpha-kinase 1	protein_coding	protein_coding	-0.167757	-1.12331	0.258402	0.48167	Not regulated	3.53	3.61	3.48	2.71	3.05	3.3	2.58
Alpk2	<a href='https://www.ncbi.nlm.nih.gov/gene/?term=498875' target="_blank"> 498875 </a>	alpha-kinase 2	protein_coding	protein_coding	-0.277994	-1.21251	0.330105	0.556329	Not regulated	0.68	1.02	0.89	0.56	0.81	0.64	0.5
Alpk3	<a href='https://www.ncbi.nlm.nih.gov/gene/?term=365298' target="_blank"> 365298 </a>	alpha-kinase 3	protein_coding	protein_coding	0.290083	1.22271	0.182354	0.387124	Not regulated	2.51	3.89	3.06	3.14	4.23	4.74	2.63
Alpl	<a href='https://www.ncbi.nlm.nih.gov/gene/?term=25586' target="_blank"> 25586 </a>	alkaline phosphatase, biomineralization associated	protein_coding	protein_coding	0.252476	1.19125	0.190179	0.397704	Not regulated	3.17	3.14	4.49	3.37	3.99	4.31	4.39
Als2	<a href='https://www.ncbi.nlm.nih.gov/gene/?term=363235' target="_blank"> 363235 </a>	alsin Rho guanine nucleotide exchange factor ALS2	protein_coding	protein_coding	0.145621	1.10621	0.0933099	0.252815	Not regulated	21.94	22.24	21.22	24.58	26.62	23.64	24.69
Als2cl	<a href='https://www.ncbi.nlm.nih.gov/gene/?term=316017' target="_blank"> 316017 </a>	ALS2 C-terminal like	protein_coding	protein_coding	-0.0995234	-1.07142	0.290084	0.515183	Not regulated	14.13	13.57	14.51	12.26	11.79	13.7	12.75
Alx1	<a href='https://www.ncbi.nlm.nih.gov/gene/?term=25401' target="_blank"> 25401 </a>	ALX homeobox 1	protein_coding	protein_coding	-0.276019	-1.21085	0.202746	0.414579	Not regulated	4.38	3.91	3.82	3.71	2.69	4.12	3.07
Alx4	<a href='https://www.ncbi.nlm.nih.gov/gene/?term=296511' target="_blank"> 296511 </a>	ALX homeobox 4	protein_coding	protein_coding	0.040187	1.02825	0.864434	0.938234	Not regulated	2.7	4.21	4.03	3.2	3.27	4.05	3.6
Alyref	<a href='https://www.ncbi.nlm.nih.gov/gene/?term=690585' target="_blank"> 690585 </a>	Aly/REF export factor	protein_coding	protein_coding	0.153927	1.11259	0.0777786	0.223923	Not regulated	54.58	58.56	61.53	62.36	63.94	70.57	63.8
Amacr	<a href='https://www.ncbi.nlm.nih.gov/gene/?term=25284' target="_blank"> 25284 </a>	alpha-methylacyl-CoA racemase	protein_coding	protein_coding	0.0727329	1.05171	0.557772	0.751961	Not regulated	11.7	12.23	11.89	13.81	13.02	13.57	12.61
Ambra1	<a href='https://www.ncbi.nlm.nih.gov/gene/?term=59319' target="_blank"> 59319 </a>	autophagy and beclin 1 regulator 1	protein_coding	protein_coding	-0.230597	-1.17332	0.00383076	0.025785	Not regulated	16.04	16.81	15.76	15.38	13.04	13.2	14.79
Amd1	<a href='https://www.ncbi.nlm.nih.gov/gene/?term=81640' target="_blank"> 81640 </a>	adenosylmethionine decarboxylase 1	protein_coding	protein_coding	0.222976	1.16714	0.0107967	0.0561274	Not regulated	30.53	34.75	33.21	32.98	39.09	36.28	39.78
Amdhd2	<a href='https://www.ncbi.nlm.nih.gov/gene/?term=302972' target="_blank"> 302972 </a>	amidohydrolase domain containing 2	protein_coding	protein_coding	0.159738	1.11708	0.344821	0.570438	Not regulated	12.41	12.13	15.85	11.04	12.39	15.44	15.49
Amer1	<a href='https://www.ncbi.nlm.nih.gov/gene/?term=501584' target="_blank"> 501584 </a>	APC membrane recruitment protein 1	protein_coding	protein_coding	-0.114882	-1.08289	0.257958	0.481315	Not regulated	6.18	5.48	6.04	6.58	5.7	5.8	5.35
Amfr	<a href='https://www.ncbi.nlm.nih.gov/gene/?term=361367' target="_blank"> 361367 </a>	autocrine motility factor receptor	protein_coding	protein_coding	0.0648971	1.04601	0.42505	0.644055	Not regulated	148.66	161.08	152.28	171.32	175.35	156.32	165.58
Amigo1	<a href='https://www.ncbi.nlm.nih.gov/gene/?term=295365' target="_blank"> 295365 </a>	adhesion molecule with Ig like domain 1	protein_coding	protein_coding	-0.0953491	-1.06832	0.386881	0.608629	Not regulated	3.91	4.1	3.94	3.52	3.75	3.6	3.52
Amigo2	<a href='https://www.ncbi.nlm.nih.gov/gene/?term=300186' target="_blank"> 300186 </a>	adhesion molecule with Ig like domain 2	protein_coding	protein_coding	0.393529	1.3136	0.199697	0.410841	Not regulated	1.58	2.78	1.77	2.02	2.69	1.58	3.72
Ammecr1	<a href='https://www.ncbi.nlm.nih.gov/gene/?term=501539' target="_blank"> 501539 </a>	AMMECR nuclear protein 1	protein_coding	protein_coding	0.462597	1.37802	0.00508652	0.0320943	Not regulated	6.73	6.25	6.74	6.84	6.94	9.02	11.55
Ammecr1l	<a href='https://www.ncbi.nlm.nih.gov/gene/?term=307526' target="_blank"> 307526 </a>	AMMECR1 like	protein_coding	protein_coding	-0.0376509	-1.02644	0.66662	0.822494	Not regulated	26.77	28.2	29.16	31.09	29.91	26.12	29.87
Amn1	<a href='https://www.ncbi.nlm.nih.gov/gene/?term=302032' target="_blank"> 302032 </a>	antagonist of mitotic exit network 1 homolog	protein_coding	protein_coding	0.11886	1.08588	0.551145	0.747108	Not regulated	6.76	6.36	4.9	6.97	6.58	6.49	7.06
Amot	<a href='https://www.ncbi.nlm.nih.gov/gene/?term=300289' target="_blank"> 300289 </a>	angiomotin	protein_coding	protein_coding	0.0475473	1.03351	0.814447	0.910031	Not regulated	1.13	1.65	1.71	1.77	1.8	1.5	1.55
Amotl1	<a href='https://www.ncbi.nlm.nih.gov/gene/?term=315430' target="_blank"> 315430 </a>	angiomotin-like 1	protein_coding	protein_coding	-0.072406	-1.05147	0.596956	0.778419	Not regulated	31.36	37.12	30.04	26.75	24.96	30.07	34.06
Amotl2	<a href='https://www.ncbi.nlm.nih.gov/gene/?term=65157' target="_blank"> 65157 </a>	angiomotin like 2	protein_coding	protein_coding	-0.131116	-1.09514	0.283539	0.507606	Not regulated	57.05	44.59	56.77	47.13	41.96	52.27	47.06
Ampd1	<a href='https://www.ncbi.nlm.nih.gov/gene/?term=25028' target="_blank"> 25028 </a>	adenosine monophosphate deaminase 1	protein_coding	protein_coding	-0.911682	-1.88124	0.00218223	0.016573	Down in F_UVB_WT_MG	10.29	14.27	14.82	10.83	8.01	8.75	3.15
Ampd2	<a href='https://www.ncbi.nlm.nih.gov/gene/?term=362015' target="_blank"> 362015 </a>	adenosine monophosphate deaminase 2	protein_coding	protein_coding	0.535343	1.44929	0.000694875	0.00670083	Up in F_UVB_WT_MG	6.8	6.17	5.01	4.73	7.92	7.63	9.13
Ampd3	<a href='https://www.ncbi.nlm.nih.gov/gene/?term=25095' target="_blank"> 25095 </a>	adenosine monophosphate deaminase 3	protein_coding	protein_coding	-0.148864	-1.1087	0.239301	0.459328	Not regulated	42.75	58.15	46.5	57.83	44.76	43.36	50.85
Amt	<a href='https://www.ncbi.nlm.nih.gov/gene/?term=306586' target="_blank"> 306586 </a>	aminomethyltransferase	protein_coding	protein_coding	-0.722331	-1.64985	2.88373e-05	0.000518213	Down in F_UVB_WT_MG	4.37	3.81	3.96	4.01	2.47	2.75	2.07
Amz1	<a href='https://www.ncbi.nlm.nih.gov/gene/?term=304317' target="_blank"> 304317 </a>	archaelysin family metallopeptidase 1	protein_coding	protein_coding	-0.289286	-1.22203	0.328074	0.55435	Not regulated	2.43	1.92	2.03	1.44	1.17	2.11	1.57
Amz2	<a href='https://www.ncbi.nlm.nih.gov/gene/?term=360650' target="_blank"> 360650 </a>	archaelysin family metallopeptidase 2	protein_coding	protein_coding	-0.0739783	-1.05262	0.29093	0.515841	Not regulated	27.49	27.01	27.24	25.89	25.26	25.69	25.98
Anapc1	<a href='https://www.ncbi.nlm.nih.gov/gene/?term=311412' target="_blank"> 311412 </a>	anaphase promoting complex subunit 1	protein_coding	protein_coding	-0.0341806	-1.02398	0.658585	0.817215	Not regulated	15.1	16.03	14.26	16.42	14.27	15.17	15.91
Anapc10	<a href='https://www.ncbi.nlm.nih.gov/gene/?term=361389' target="_blank"> 361389 </a>	anaphase promoting complex subunit 10	protein_coding	protein_coding	0.104965	1.07547	0.318051	0.543002	Not regulated	11.18	10.45	10.89	11.37	11.48	12.75	11.25
Anapc11	<a href='https://www.ncbi.nlm.nih.gov/gene/?term=498030' target="_blank"> 498030 </a>	anaphase promoting complex subunit 11	protein_coding	protein_coding	-0.012203	-1.00849	0.912491	0.960053	Not regulated	7.27	7.57	7.51	7.96	7.15	8.65	6.84
Anapc13	<a href='https://www.ncbi.nlm.nih.gov/gene/?term=685029' target="_blank"> 685029 </a>	anaphase promoting complex subunit 13	protein_coding	protein_coding	-0.0198568	-1.01386	0.846137	0.927917	Not regulated	135.14	118.48	114.37	109.44	120.82	122.35	110.06
Anapc15	<a href='https://www.ncbi.nlm.nih.gov/gene/?term=293155' target="_blank"> 293155 </a>	anaphase promoting complex subunit 15	protein_coding	protein_coding	0.216047	1.16155	0.0327949	0.125066	Not regulated	38.86	34.17	32.71	34.38	41.19	44.9	39.6
Anapc16	<a href='https://www.ncbi.nlm.nih.gov/gene/?term=100360936' target="_blank"> 100360936 </a>	anaphase promoting complex subunit 16	protein_coding	protein_coding	0.226145	1.16971	0.0691046	0.207814	Not regulated	30.3	29.96	31.95	37.55	42.08	34.9	39.24
Anapc2	<a href='https://www.ncbi.nlm.nih.gov/gene/?term=296558' target="_blank"> 296558 </a>	anaphase promoting complex subunit 2	protein_coding	protein_coding	-0.0982735	-1.07049	0.288751	0.513966	Not regulated	51.36	47.23	51.45	44.52	42.19	50.47	44.05
Anapc4	<a href='https://www.ncbi.nlm.nih.gov/gene/?term=305420' target="_blank"> 305420 </a>	anaphase promoting complex subunit 4	protein_coding	protein_coding	0.0115277	1.00802	0.912543	0.960053	Not regulated	16.31	14.64	14.8	13.7	14.15	14.4	16.42
Anapc5	<a href='https://www.ncbi.nlm.nih.gov/gene/?term=288671' target="_blank"> 288671 </a>	anaphase-promoting complex subunit 5	protein_coding	protein_coding	0.0425168	1.02991	0.517496	0.72203	Not regulated	138.05	148.46	141.82	144.9	152.3	152.91	137.75
Anapc7	<a href='https://www.ncbi.nlm.nih.gov/gene/?term=304490' target="_blank"> 304490 </a>	anaphase promoting complex subunit 7	protein_coding	protein_coding	-0.104041	-1.07478	0.258532	0.481845	Not regulated	27.14	28.16	25.28	28.23	27.32	24.34	23.74
Angel1	<a href='https://www.ncbi.nlm.nih.gov/gene/?term=362765' target="_blank"> 362765 </a>	angel homolog 1	protein_coding	protein_coding	-0.148328	-1.10828	0.111233	0.282548	Not regulated	15.76	13.58	13.93	14.17	13.09	13.34	12.49
Angel2	<a href='https://www.ncbi.nlm.nih.gov/gene/?term=305035' target="_blank"> 305035 </a>	angel homolog 2	protein_coding	protein_coding	-0.0509254	-1.03593	0.627446	0.798729	Not regulated	14.34	15.9	13.04	16.04	15.11	13.38	14.46
Angpt1	<a href='https://www.ncbi.nlm.nih.gov/gene/?term=89807' target="_blank"> 89807 </a>	angiopoietin 1	protein_coding	protein_coding	-1.41658	-2.66953	1.98026e-05	0.000372467	Down in F_UVB_WT_MG	2.22	4.86	4.53	2.15	1.04	1.24	1.59
Angpt2	<a href='https://www.ncbi.nlm.nih.gov/gene/?term=89805' target="_blank"> 89805 </a>	angiopoietin 2	protein_coding	protein_coding	0.444165	1.36053	0.0358005	0.132722	Not regulated	2.75	3.86	2.7	2.42	3.69	3.99	4.35
Angptl1	<a href='https://www.ncbi.nlm.nih.gov/gene/?term=679942' target="_blank"> 679942 </a>	angiopoietin-like 1	protein_coding	protein_coding	0.0329803	1.02312	0.828489	0.918683	Not regulated	22.12	21.73	20.65	18.72	17.25	27.13	19.72
Angptl2	<a href='https://www.ncbi.nlm.nih.gov/gene/?term=171100' target="_blank"> 171100 </a>	angiopoietin-like 2	protein_coding	protein_coding	0.281338	1.21532	0.01078	0.0560849	Not regulated	21.6	20.14	21.01	17.7	22.19	27.85	23.56
Angptl4	<a href='https://www.ncbi.nlm.nih.gov/gene/?term=362850' target="_blank"> 362850 </a>	angiopoietin-like 4	protein_coding	protein_coding	0.339277	1.26512	0.0566581	0.181894	Not regulated	25.56	24.23	25.06	15.65	32.11	28.56	25.24
Angptl7	<a href='https://www.ncbi.nlm.nih.gov/gene/?term=102552055' target="_blank"> 102552055 </a>	angiopoietin like 7	protein_coding	protein_coding	-0.29211	-1.22443	0.70191	0.843892	Not regulated	27.76	20.68	15.1	12.01	13.1	2.97	30.05
Ank1	<a href='https://www.ncbi.nlm.nih.gov/gene/?term=306570' target="_blank"> 306570 </a>	ankyrin 1	protein_coding	protein_coding	-0.414551	-1.33288	0.125025	0.305734	Not regulated	7.38	10.88	10.09	6.74	6.02	9.61	4.2
Ank2	<a href='https://www.ncbi.nlm.nih.gov/gene/?term=362036' target="_blank"> 362036 </a>	ankyrin 2	protein_coding	protein_coding	-0.106267	-1.07644	0.556429	0.750979	Not regulated	1.23	1.53	1.49	1.2	0.98	1.6	1.32
Ank3	<a href='https://www.ncbi.nlm.nih.gov/gene/?term=361833' target="_blank"> 361833 </a>	ankyrin 3	protein_coding	protein_coding	-0.213018	-1.15911	0.0300518	0.117056	Not regulated	12.25	12.09	11.64	9.74	9.68	10.12	9.86
Ankdd1a	<a href='https://www.ncbi.nlm.nih.gov/gene/?term=100362785' target="_blank"> 100362785 </a>	ankyrin repeat and death domain containing 1A	protein_coding	protein_coding	0.258517	1.19625	0.26777	0.491011	Not regulated	1.01	0.79	1.16	0.57	0.9	0.91	1.02
Ankdd1b	<a href='https://www.ncbi.nlm.nih.gov/gene/?term=100359662' target="_blank"> 100359662 </a>	ankyrin repeat and death domain containing 1B	protein_coding	protein_coding	0.0455383	1.03207	0.907291	0.957477	Not regulated	1.52	1.09	1.59	1.22	1.21	0.84	2.11
Ankfy1	<a href='https://www.ncbi.nlm.nih.gov/gene/?term=303292' target="_blank"> 303292 </a>	ankyrin repeat and FYVE domain containing 1	protein_coding	protein_coding	-0.0232689	-1.01626	0.786165	0.891833	Not regulated	21.22	19.5	19.61	17.62	18.14	20.67	18.86
Ankh	<a href='https://www.ncbi.nlm.nih.gov/gene/?term=114506' target="_blank"> 114506 </a>	ANKH inorganic pyrophosphate transport regulator	protein_coding	protein_coding	-0.082398	-1.05878	0.345194	0.57059	Not regulated	45.29	42.87	45.65	46.8	38.79	42.5	46.6
Ankib1	<a href='https://www.ncbi.nlm.nih.gov/gene/?term=368062' target="_blank"> 368062 </a>	ankyrin repeat and IBR domain containing 1	protein_coding	protein_coding	-0.0555672	-1.03927	0.503171	0.711191	Not regulated	11.53	12.71	10.96	12.54	12.97	12.17	11.07
Ankk1	<a href='https://www.ncbi.nlm.nih.gov/gene/?term=367080' target="_blank"> 367080 </a>	ankyrin repeat and kinase domain containing 1	protein_coding	protein_coding	-1.25884	-2.39304	3.078e-08	1.69483e-06	Down in F_UVB_WT_MG	4.14	4.3	4.91	3.91	2.4	1.48	1.51
Ankle1	<a href='https://www.ncbi.nlm.nih.gov/gene/?term=361122' target="_blank"> 361122 </a>	ankyrin repeat and LEM domain containing 1	protein_coding	protein_coding	0.633903	1.55176	0.0264554	0.107421	Not regulated	1.4	2.16	1.32	1.88	2.27	3.3	2.37
Ankle2	<a href='https://www.ncbi.nlm.nih.gov/gene/?term=360829' target="_blank"> 360829 </a>	ankyrin repeat and LEM domain containing 2	protein_coding	protein_coding	-0.260419	-1.19783	0.000565203	0.00572871	Not regulated	11.68	13.19	12.05	12.61	9.81	11.38	9.91
Ankmy1	<a href='https://www.ncbi.nlm.nih.gov/gene/?term=684015' target="_blank"> 684015 </a>	ankyrin repeat and MYND domain containing 1	protein_coding	protein_coding	-0.559718	-1.47398	2.80634e-05	0.000507737	Down in F_UVB_WT_MG	4.65	5.2	4.48	3.82	3	3.22	2.89
Ankmy2	<a href='https://www.ncbi.nlm.nih.gov/gene/?term=314046' target="_blank"> 314046 </a>	ankyrin repeat and MYND domain containing 2	protein_coding	protein_coding	-0.115656	-1.08347	0.10237	0.267764	Not regulated	36.94	36.47	34.61	36.48	33.32	35.39	32.12
Ankrd1	<a href='https://www.ncbi.nlm.nih.gov/gene/?term=27064' target="_blank"> 27064 </a>	ankyrin repeat domain 1	protein_coding	protein_coding	2.23592	4.71061	1.14223e-06	3.43652e-05	Up in F_UVB_WT_MG	0.58	0.93	0.43	1.05	2.7	6.24	2.1
Ankrd11	<a href='https://www.ncbi.nlm.nih.gov/gene/?term=365023' target="_blank"> 365023 </a>	ankyrin repeat domain 11	protein_coding	protein_coding	-0.161993	-1.11883	0.0505472	0.16853	Not regulated	37.52	40.42	36.09	33.52	34.34	31.81	33.66
Ankrd12	<a href='https://www.ncbi.nlm.nih.gov/gene/?term=316775' target="_blank"> 316775 </a>	ankyrin repeat domain 12	protein_coding	protein_coding	-0.325525	-1.25312	0.000105471	0.00149526	Not regulated	7.3	7.95	6.97	7.22	5.57	5.78	6.3
Ankrd13a	<a href='https://www.ncbi.nlm.nih.gov/gene/?term=360823' target="_blank"> 360823 </a>	ankyrin repeat domain 13a	protein_coding	protein_coding	-0.042333	-1.02978	0.542444	0.741054	Not regulated	101.39	104.08	107.09	99.66	98.8	93.74	106.21
Ankrd13b	<a href='https://www.ncbi.nlm.nih.gov/gene/?term=360575' target="_blank"> 360575 </a>	ankyrin repeat domain 13B	protein_coding	protein_coding	-0.0905478	-1.06477	0.390509	0.611386	Not regulated	8.97	8.68	8.26	8.29	7.85	7.27	8.99
Ankrd13c	<a href='https://www.ncbi.nlm.nih.gov/gene/?term=685374' target="_blank"> 685374 </a>	ankyrin repeat domain 13C	protein_coding	protein_coding	0.0219984	1.01536	0.827719	0.918398	Not regulated	50.81	52.72	53.45	63.39	56.4	52.56	59.06
Ankrd13d	<a href='https://www.ncbi.nlm.nih.gov/gene/?term=361699' target="_blank"> 361699 </a>	ankyrin repeat domain 13D	protein_coding	protein_coding	-0.225259	-1.16899	0.134606	0.319897	Not regulated	5.65	6.02	5.8	5.57	4.46	4.87	5.48
Ankrd16	<a href='https://www.ncbi.nlm.nih.gov/gene/?term=307102' target="_blank"> 307102 </a>	ankyrin repeat domain 16	protein_coding	protein_coding	0.220729	1.16532	0.350751	0.575624	Not regulated	5.05	3.56	3.6	3.64	4.68	4.96	4.2
Ankrd17	<a href='https://www.ncbi.nlm.nih.gov/gene/?term=289521' target="_blank"> 289521 </a>	ankyrin repeat domain 17	protein_coding	protein_coding	-0.00451691	-1.00314	0.958031	0.980693	Not regulated	28.97	32.48	28.54	33.19	32.42	29	30.48
Ankrd2	<a href='https://www.ncbi.nlm.nih.gov/gene/?term=309374' target="_blank"> 309374 </a>	ankyrin repeat domain 2	protein_coding	protein_coding	2.24146	4.72875	3.17707e-08	1.73863e-06	Up in F_UVB_WT_MG	0.82	1.81	1.53	2.8	6.91	12.6	5.01
Ankrd22	<a href='https://www.ncbi.nlm.nih.gov/gene/?term=294093' target="_blank"> 294093 </a>	ankyrin repeat domain 22	protein_coding	protein_coding	0.0444098	1.03126	0.649003	0.812236	Not regulated	95.82	94.32	94.35	105.1	107.01	90.32	104.15
Ankrd23	<a href='https://www.ncbi.nlm.nih.gov/gene/?term=316330' target="_blank"> 316330 </a>	ankyrin repeat domain 23	protein_coding	protein_coding	0.321303	1.24946	0.426659	0.64562	Not regulated	10.82	20.23	19.71	18.32	22.13	31.14	11.57
Ankrd24	<a href='https://www.ncbi.nlm.nih.gov/gene/?term=299639' target="_blank"> 299639 </a>	ankyrin repeat domain 24	protein_coding	protein_coding	-0.0109204	-1.0076	0.955732	0.97975	Not regulated	1.99	1.67	1.55	2	1.66	1.92	1.79
Ankrd26	<a href='https://www.ncbi.nlm.nih.gov/gene/?term=312667' target="_blank"> 312667 </a>	ankyrin repeat domain 26	protein_coding	protein_coding	0.0131514	1.00916	0.926819	0.966589	Not regulated	2.5	2.97	2.86	2.89	3.15	2.86	2.53
Ankrd27	<a href='https://www.ncbi.nlm.nih.gov/gene/?term=361555' target="_blank"> 361555 </a>	ankyrin repeat domain 27	protein_coding	protein_coding	0.141959	1.1034	0.176931	0.380593	Not regulated	31.75	32.28	36.95	35.25	41.81	38.7	33.32
Ankrd28	<a href='https://www.ncbi.nlm.nih.gov/gene/?term=306264' target="_blank"> 306264 </a>	ankyrin repeat domain 28	protein_coding	protein_coding	0.134022	1.09735	0.0874499	0.242121	Not regulated	22.36	24.46	21.75	24.77	26.07	24.43	27.52
Ankrd29	<a href='https://www.ncbi.nlm.nih.gov/gene/?term=498823' target="_blank"> 498823 </a>	ankyrin repeat domain 29	protein_coding	protein_coding	-0.315595	-1.24452	0.223561	0.440171	Not regulated	1.8	1.78	2.1	1.52	1.17	1.88	1.66
Ankrd33b	<a href='https://www.ncbi.nlm.nih.gov/gene/?term=310200' target="_blank"> 310200 </a>	ankyrin repeat domain 33B	protein_coding	protein_coding	-0.0577974	-1.04088	0.876707	0.94408	Not regulated	1.77	1.62	0.98	1.18	0.91	1.24	1.85
Ankrd35	<a href='https://www.ncbi.nlm.nih.gov/gene/?term=365881' target="_blank"> 365881 </a>	ankyrin repeat domain 35	protein_coding	protein_coding	-0.667194	-1.58798	2.20991e-05	0.000411587	Down in F_UVB_WT_MG	23.56	19.79	21.84	16.02	11.2	12.12	15.1
Ankrd37	<a href='https://www.ncbi.nlm.nih.gov/gene/?term=361149' target="_blank"> 361149 </a>	ankyrin repeat domain 37	protein_coding	protein_coding	-0.338289	-1.26426	0.559834	0.753052	Not regulated	0.82	1.18	2.62	0.71	1.09	0.94	1.08
Ankrd40	<a href='https://www.ncbi.nlm.nih.gov/gene/?term=690586' target="_blank"> 690586 </a>	ankyrin repeat domain 40	protein_coding	protein_coding	0.0798058	1.05688	0.361944	0.58497	Not regulated	30.47	32.92	35.37	32.76	32.58	38.28	33.72
Ankrd42	<a href='https://www.ncbi.nlm.nih.gov/gene/?term=293117' target="_blank"> 293117 </a>	ankyrin repeat domain 42	protein_coding	protein_coding	-0.38247	-1.30357	0.0169995	0.0781865	Not regulated	6.1	6.8	6.65	5.81	3.83	5.51	5.33
Ankrd44	<a href='https://www.ncbi.nlm.nih.gov/gene/?term=301415' target="_blank"> 301415 </a>	ankyrin repeat domain 44	protein_coding	protein_coding	-0.465146	-1.38046	0.0214629	0.092697	Not regulated	3.46	2.83	3.04	2.35	1.57	2.77	2.08
Ankrd46	<a href='https://www.ncbi.nlm.nih.gov/gene/?term=299982' target="_blank"> 299982 </a>	ankyrin repeat domain 46	protein_coding	protein_coding	-0.194554	-1.14437	0.0710309	0.211644	Not regulated	17.85	21.64	23.62	22.99	17.96	19.66	19.05
Ankrd49	<a href='https://www.ncbi.nlm.nih.gov/gene/?term=315434' target="_blank"> 315434 </a>	ankyrin repeat domain 49	protein_coding	protein_coding	0.0434255	1.03056	0.673725	0.825428	Not regulated	26.41	25.31	23.77	29.75	26.38	26.9	28.13
Ankrd50	<a href='https://www.ncbi.nlm.nih.gov/gene/?term=294988' target="_blank"> 294988 </a>	ankyrin repeat domain 50	protein_coding	protein_coding	-0.0604371	-1.04278	0.530039	0.731897	Not regulated	11.45	11.37	12.08	10.67	10.07	10.66	12.09
Ankrd52	<a href='https://www.ncbi.nlm.nih.gov/gene/?term=362811' target="_blank"> 362811 </a>	ankyrin repeat domain 52	protein_coding	protein_coding	0.31712	1.24584	0.000366788	0.0040919	Not regulated	11.48	12.92	11.95	13.11	15.76	15.25	15.27
Ankrd54	<a href='https://www.ncbi.nlm.nih.gov/gene/?term=362957' target="_blank"> 362957 </a>	ankyrin repeat domain 54	protein_coding	protein_coding	0.284134	1.21768	0.0378991	0.138092	Not regulated	14.58	15.51	12.75	17.17	20.32	17.52	16.88
Ankrd6	<a href='https://www.ncbi.nlm.nih.gov/gene/?term=500430' target="_blank"> 500430 </a>	ankyrin repeat domain 6	protein_coding	protein_coding	-0.422837	-1.34056	0.00199772	0.0154542	Not regulated	5.39	4.4	4.83	4.29	3.64	3.65	3.3
Ankrd65	<a href='https://www.ncbi.nlm.nih.gov/gene/?term=680734' target="_blank"> 680734 </a>	ankyrin repeat domain 65	protein_coding	protein_coding	0.0300008	1.02101	0.945294	0.97529	Not regulated	0.92	0.93	0.65	1.26	1.3	0.8	0.76
Ankrd9	<a href='https://www.ncbi.nlm.nih.gov/gene/?term=314457' target="_blank"> 314457 </a>	ankyrin repeat domain 9	protein_coding	protein_coding	-0.0974596	-1.06989	0.309856	0.534362	Not regulated	28.13	30	28.67	33.88	36.72	29.76	26.52
Anks1a	<a href='https://www.ncbi.nlm.nih.gov/gene/?term=309639' target="_blank"> 309639 </a>	ankyrin repeat and sterile alpha motif domain containing 1A	protein_coding	protein_coding	-0.0770062	-1.05483	0.313895	0.538784	Not regulated	17.67	17.21	15.19	16.77	15.95	16.29	15.49
Anks3	<a href='https://www.ncbi.nlm.nih.gov/gene/?term=302937' target="_blank"> 302937 </a>	ankyrin repeat and sterile alpha motif domain containing 3	protein_coding	protein_coding	0.225697	1.16934	0.0599047	0.188637	Not regulated	8.56	9.11	8.09	7.23	9.81	9.53	9.64
Anks4b	<a href='https://www.ncbi.nlm.nih.gov/gene/?term=687561' target="_blank"> 687561 </a>	ankyrin repeat and sterile alpha motif domain containing 4B	protein_coding	protein_coding	0.369598	1.29199	0.361941	0.58497	Not regulated	0.92	0.88	0.51	0.6	1.15	0.79	0.87
Anks6	<a href='https://www.ncbi.nlm.nih.gov/gene/?term=362515' target="_blank"> 362515 </a>	ankyrin repeat and sterile alpha motif domain containing 6	protein_coding	protein_coding	0.306088	1.23635	0.108062	0.277254	Not regulated	1.56	1.88	1.86	1.38	1.8	2.23	2.2
Ankzf1	<a href='https://www.ncbi.nlm.nih.gov/gene/?term=363255' target="_blank"> 363255 </a>	ankyrin repeat and zinc finger peptidyl tRNA hydrolase 1	protein_coding	protein_coding	0.0662757	1.04701	0.583077	0.769681	Not regulated	20.17	21.01	16.45	17.19	20.43	17.63	20.65
Anln	<a href='https://www.ncbi.nlm.nih.gov/gene/?term=363031' target="_blank"> 363031 </a>	anillin, actin binding protein	protein_coding	protein_coding	0.568006	1.48247	0.00167887	0.013498	Up in F_UVB_WT_MG	15.04	15.36	19.28	13.74	18.42	31.24	21.22
Ano1	<a href='https://www.ncbi.nlm.nih.gov/gene/?term=309135' target="_blank"> 309135 </a>	anoctamin 1	protein_coding	protein_coding	0.0997964	1.07162	0.288481	0.513894	Not regulated	24.01	22.36	19.97	19.43	21.76	23.5	23.77
Ano10	<a href='https://www.ncbi.nlm.nih.gov/gene/?term=301111' target="_blank"> 301111 </a>	anoctamin 10	protein_coding	protein_coding	0.0380512	1.02673	0.61581	0.792283	Not regulated	128.87	138.72	132.93	144.26	146.93	143.44	130.85
Ano5	<a href='https://www.ncbi.nlm.nih.gov/gene/?term=308637' target="_blank"> 308637 </a>	anoctamin 5	protein_coding	protein_coding	0.521588	1.43553	0.217023	0.433486	Not regulated	1.22	1.41	1.36	0.96	2.04	3.11	0.74
Ano6	<a href='https://www.ncbi.nlm.nih.gov/gene/?term=315272' target="_blank"> 315272 </a>	anoctamin 6	protein_coding	protein_coding	0.099759	1.07159	0.421758	0.641195	Not regulated	31.73	34.25	41.54	28.75	34.66	38.46	36.87
Ano8	<a href='https://www.ncbi.nlm.nih.gov/gene/?term=306340' target="_blank"> 306340 </a>	anoctamin 8	protein_coding	protein_coding	0.106963	1.07696	0.251733	0.474723	Not regulated	21.01	22.52	20.39	23.14	22	22.26	25.96
Ano9	<a href='https://www.ncbi.nlm.nih.gov/gene/?term=499287' target="_blank"> 499287 </a>	anoctamin 9	protein_coding	protein_coding	-0.513456	-1.42747	0.0021538	0.0164227	Down in F_UVB_WT_MG	10.62	9.02	11.53	6.83	5.82	6.2	7.41
Anp32a	<a href='https://www.ncbi.nlm.nih.gov/gene/?term=25379' target="_blank"> 25379 </a>	acidic nuclear phosphoprotein 32 family member A	protein_coding	protein_coding	-0.193047	-1.14318	0.0467193	0.159424	Not regulated	175.12	164.83	177.77	161.28	139.36	174.23	145.84
Anp32b	<a href='https://www.ncbi.nlm.nih.gov/gene/?term=170724' target="_blank"> 170724 </a>	acidic nuclear phosphoprotein 32 family member B	protein_coding	protein_coding	0.151408	1.11065	0.0197948	0.0873654	Not regulated	178.8	169.08	180	184.41	193.37	197.85	202.1
Anp32e	<a href='https://www.ncbi.nlm.nih.gov/gene/?term=361999' target="_blank"> 361999 </a>	acidic nuclear phosphoprotein 32 family member E	protein_coding	protein_coding	0.0655113	1.04646	0.471966	0.68346	Not regulated	46.43	48.55	53.24	50.71	46.86	57.23	51.88
Anpep	<a href='https://www.ncbi.nlm.nih.gov/gene/?term=81641' target="_blank"> 81641 </a>	alanyl aminopeptidase, membrane	protein_coding	protein_coding	0.129928	1.09424	0.507055	0.71413	Not regulated	19.86	17.43	17.9	12.22	13.58	22.83	19.15
Antkmt	<a href='https://www.ncbi.nlm.nih.gov/gene/?term=287150' target="_blank"> 287150 </a>	adenine nucleotide translocase lysine methyltransferase			-0.212866	-1.15899	0.104826	0.271836	Not regulated	41.02	42.09	36.45	33.9	34.35	36.37	28.8
Antxr1	<a href='https://www.ncbi.nlm.nih.gov/gene/?term=362393' target="_blank"> 362393 </a>	ANTXR cell adhesion molecule 1	protein_coding	protein_coding	-0.00558137	-1.00388	0.972063	0.987765	Not regulated	22.18	17.6	20.42	19.11	14.94	24.31	20.3
Antxr2	<a href='https://www.ncbi.nlm.nih.gov/gene/?term=305633' target="_blank"> 305633 </a>	ANTXR cell adhesion molecule 2	protein_coding	protein_coding	0.37212	1.29425	0.0575124	0.183784	Not regulated	8.45	7.49	7.05	4.87	7.2	10.55	9.46
Anxa1	<a href='https://www.ncbi.nlm.nih.gov/gene/?term=25380' target="_blank"> 25380 </a>	annexin A1	protein_coding	protein_coding	0.309731	1.23948	0.010576	0.0553916	Not regulated	1174.61	1070.85	1157.02	843.01	1226.35	1447.36	1266.36
Anxa11	<a href='https://www.ncbi.nlm.nih.gov/gene/?term=290527' target="_blank"> 290527 </a>	annexin A11	protein_coding	protein_coding	-0.026653	-1.01865	0.721756	0.856803	Not regulated	73.23	76.31	76.04	66.79	67.11	78.17	70.19
Anxa2	<a href='https://www.ncbi.nlm.nih.gov/gene/?term=56611' target="_blank"> 56611 </a>	annexin A2	protein_coding	protein_coding	0.131475	1.09541	0.268455	0.491858	Not regulated	1129.64	950.64	1038.05	841.73	1010.64	1251.24	1008.17
Anxa3	<a href='https://www.ncbi.nlm.nih.gov/gene/?term=25291' target="_blank"> 25291 </a>	annexin A3	protein_coding	protein_coding	-0.357759	-1.28143	0.0312638	0.120506	Not regulated	25.87	40	37.07	27.14	22.96	30.64	24.92
Anxa4	<a href='https://www.ncbi.nlm.nih.gov/gene/?term=79124' target="_blank"> 79124 </a>	annexin A4	protein_coding	protein_coding	-0.162055	-1.11888	0.0192579	0.0856782	Not regulated	151.72	142.17	149.98	142.17	132.34	137.68	123.5
Anxa5	<a href='https://www.ncbi.nlm.nih.gov/gene/?term=25673' target="_blank"> 25673 </a>	annexin A5	protein_coding	protein_coding	0.0483202	1.03406	0.714507	0.852154	Not regulated	61.03	57.47	57.06	48.01	53.59	69.62	49.76
Anxa6	<a href='https://www.ncbi.nlm.nih.gov/gene/?term=79125' target="_blank"> 79125 </a>	annexin A6	protein_coding	protein_coding	0.137001	1.09962	0.14597	0.337174	Not regulated	86.97	90.46	90.34	84.16	100.62	106.94	84.66
Anxa7	<a href='https://www.ncbi.nlm.nih.gov/gene/?term=155423' target="_blank"> 155423 </a>	annexin A7	protein_coding	protein_coding	0.15572	1.11398	0.0471633	0.160444	Not regulated	193.92	182.47	172.01	191.94	216.83	208.6	198.26
Anxa8	<a href='https://www.ncbi.nlm.nih.gov/gene/?term=306283' target="_blank"> 306283 </a>	annexin A8	protein_coding	protein_coding	-0.224825	-1.16864	0.000459207	0.00488914	Not regulated	1235.86	1279.54	1254.56	1200.73	1039.79	1011.98	1141.5
Anxa9	<a href='https://www.ncbi.nlm.nih.gov/gene/?term=689830' target="_blank"> 689830 </a>	annexin A9	protein_coding	protein_coding	-0.673616	-1.59507	5.58215e-05	0.000892409	Down in F_UVB_WT_MG	56.62	55.55	61.75	43.15	25.84	41.55	35.15
Aoah	<a href='https://www.ncbi.nlm.nih.gov/gene/?term=498757' target="_blank"> 498757 </a>	acyloxyacyl hydrolase	protein_coding	protein_coding	1.16394	2.24069	0.0519164	0.171395	Not regulated	0.29	0.19	0.46	0.26	0.37	0.3	0.74
Aox1	<a href='https://www.ncbi.nlm.nih.gov/gene/?term=54349' target="_blank"> 54349 </a>	aldehyde oxidase 1	protein_coding	protein_coding	-0.47213	-1.38716	0.0172728	0.0790414	Not regulated	4.19	5.09	3.4	3.22	2.39	3.24	3.11
Aox2	<a href='https://www.ncbi.nlm.nih.gov/gene/?term=316421' target="_blank"> 316421 </a>	aldehyde oxidase 2	protein_coding	protein_coding	-0.557265	-1.47148	0.11165	0.283303	Not regulated	0.51	0.46	0.58	0.44	0.26	0.44	0.34
Aox4	<a href='https://www.ncbi.nlm.nih.gov/gene/?term=316424' target="_blank"> 316424 </a>	aldehyde oxidase 4	protein_coding	protein_coding	0.797158	1.73767	0.0129816	0.0641505	Not regulated	24.85	25.86	24.91	38.09	40.48	37.97	69.6
Ap1ar	<a href='https://www.ncbi.nlm.nih.gov/gene/?term=362037' target="_blank"> 362037 </a>	adaptor-related protein complex 1 associated regulatory protein	protein_coding	protein_coding	-0.139076	-1.1012	0.0969775	0.259322	Not regulated	28.42	30.1	26.7	30.35	25.51	25.49	27.75
Ap1b1	<a href='https://www.ncbi.nlm.nih.gov/gene/?term=29663' target="_blank"> 29663 </a>	adaptor related protein complex 1 subunit beta 1	protein_coding	protein_coding	0.048893	1.03447	0.512489	0.718284	Not regulated	88.34	84.08	88.47	92.85	91.52	97.69	85.56
Ap1m1	<a href='https://www.ncbi.nlm.nih.gov/gene/?term=306332' target="_blank"> 306332 </a>	adaptor related protein complex 1 subunit mu 1	protein_coding	protein_coding	0.254962	1.1933	0.00202232	0.0155575	Not regulated	33.23	39.08	35.18	35.01	40.13	45.31	42.29
Ap1m2	<a href='https://www.ncbi.nlm.nih.gov/gene/?term=367038' target="_blank"> 367038 </a>	adaptor related protein complex 1 subunit mu 2	protein_coding	protein_coding	0.0239658	1.01675	0.755999	0.875111	Not regulated	160.6	166.41	157.07	180.24	175.77	166.78	163.31
Ap1s1	<a href='https://www.ncbi.nlm.nih.gov/gene/?term=360785' target="_blank"> 360785 </a>	adaptor-related protein complex 1, sigma 1 subunit	protein_coding	protein_coding	0.141217	1.10283	0.0559545	0.180603	Not regulated	215.86	250.9	222.18	246.27	257.33	260.61	263.05
Ap1s2	<a href='https://www.ncbi.nlm.nih.gov/gene/?term=302671' target="_blank"> 302671 </a>	adaptor related protein complex 1 subunit sigma 2	protein_coding	protein_coding	0.317901	1.24652	0.164939	0.364517	Not regulated	2.99	3.26	3.28	2.5	2.78	4.89	3.67
Ap1s3	<a href='https://www.ncbi.nlm.nih.gov/gene/?term=367304' target="_blank"> 367304 </a>	adaptor related protein complex 1 subunit sigma 3	protein_coding	protein_coding	-0.246569	-1.18638	0.0607998	0.190373	Not regulated	12.13	12.04	13.06	13.66	9.85	11.35	11.86
Ap2a1	<a href='https://www.ncbi.nlm.nih.gov/gene/?term=308578' target="_blank"> 308578 </a>	adaptor related protein complex 2 subunit alpha 1	protein_coding	protein_coding	0.11402	1.08224	0.100753	0.265178	Not regulated	44.84	47.72	47.59	49.78	52.28	50.03	51.94
Ap2a2	<a href='https://www.ncbi.nlm.nih.gov/gene/?term=81637' target="_blank"> 81637 </a>	adaptor related protein complex 2 subunit alpha 2	protein_coding	protein_coding	0.148129	1.10813	0.0973887	0.259796	Not regulated	64.69	71.44	64.01	76.78	80.78	77.37	72.26
Ap2b1	<a href='https://www.ncbi.nlm.nih.gov/gene/?term=140670' target="_blank"> 140670 </a>	adaptor related protein complex 2 subunit beta 1	protein_coding	protein_coding	-0.00517711	-1.00359	0.931665	0.969364	Not regulated	39.74	43.17	41.32	42.72	40.31	43.68	39.66
Ap2m1	<a href='https://www.ncbi.nlm.nih.gov/gene/?term=116563' target="_blank"> 116563 </a>	adaptor related protein complex 2 subunit mu 1	protein_coding	protein_coding	0.0975877	1.06998	0.0627743	0.19445	Not regulated	209.15	206.9	211.05	199.6	216.96	229.86	217.67
Ap2s1	<a href='https://www.ncbi.nlm.nih.gov/gene/?term=65046' target="_blank"> 65046 </a>	adaptor related protein complex 2 subunit sigma 1	protein_coding	protein_coding	0.171875	1.12652	0.00448528	0.0290104	Not regulated	176.21	178.99	174.14	177.27	189.91	208.91	198.91
Ap3b1	<a href='https://www.ncbi.nlm.nih.gov/gene/?term=309969' target="_blank"> 309969 </a>	adaptor related protein complex 3 subunit beta 1	protein_coding	protein_coding	0.0117808	1.0082	0.874562	0.943185	Not regulated	28.38	30.96	30.37	29.15	28.97	32.69	28.48
Ap3d1	<a href='https://www.ncbi.nlm.nih.gov/gene/?term=314633' target="_blank"> 314633 </a>	adaptor related protein complex 3 subunit delta 1	protein_coding	protein_coding	0.11477	1.0828	0.0969008	0.259221	Not regulated	64.87	73.78	66.84	68.02	77.76	72.83	71.71
Ap3m1	<a href='https://www.ncbi.nlm.nih.gov/gene/?term=171126' target="_blank"> 171126 </a>	adaptor related protein complex 3 subunit mu 1	protein_coding	protein_coding	-0.0709434	-1.0504	0.310633	0.535254	Not regulated	43.16	40.64	41.12	42.3	39.99	39.78	40.19
Ap3m2	<a href='https://www.ncbi.nlm.nih.gov/gene/?term=140667' target="_blank"> 140667 </a>	adaptor related protein complex 3 subunit mu 2	protein_coding	protein_coding	-0.12087	-1.08739	0.386817	0.608601	Not regulated	6.36	5.29	6.1	5.46	4.7	5.59	5.75
Ap3s1	<a href='https://www.ncbi.nlm.nih.gov/gene/?term=302290' target="_blank"> 302290 </a>	adaptor related protein complex 3 subunit sigma 1	protein_coding	protein_coding	-0.0451399	-1.03178	0.633695	0.803414	Not regulated	61.05	61.22	62.67	72.4	61.07	64.41	64.66
Ap3s2	<a href='https://www.ncbi.nlm.nih.gov/gene/?term=683402' target="_blank"> 683402 </a>	adaptor related protein complex 3 subunit sigma 2	protein_coding	protein_coding	0.00844299	1.00587	0.91082	0.959069	Not regulated	76.61	74.51	67.55	72.27	74.93	72.62	69.49
Ap4b1	<a href='https://www.ncbi.nlm.nih.gov/gene/?term=310746' target="_blank"> 310746 </a>	adaptor related protein complex 4 subunit beta 1	protein_coding	protein_coding	-0.20883	-1.15575	0.0205377	0.0896913	Not regulated	16.26	17.86	17.14	16.38	15.04	12.87	15.1
Ap4e1	<a href='https://www.ncbi.nlm.nih.gov/gene/?term=311404' target="_blank"> 311404 </a>	adaptor related protein complex 4 subunit epsilon 1	protein_coding	protein_coding	-0.0779009	-1.05548	0.580017	0.76724	Not regulated	9.87	11.46	9.92	13.1	11.67	9.48	10.34
Ap4m1	<a href='https://www.ncbi.nlm.nih.gov/gene/?term=304344' target="_blank"> 304344 </a>	adaptor related protein complex 4 subunit mu 1	protein_coding	protein_coding	-0.175442	-1.12931	0.0380372	0.138353	Not regulated	21.93	22.73	22.83	25	20.93	21.22	19.37
Ap4s1	<a href='https://www.ncbi.nlm.nih.gov/gene/?term=366618' target="_blank"> 366618 </a>	adaptor related protein complex 4 subunit sigma 1	protein_coding	protein_coding	0.0406439	1.02857	0.718662	0.854885	Not regulated	17.56	17.8	18.89	17.39	20.29	17.51	17.45
Ap5b1	<a href='https://www.ncbi.nlm.nih.gov/gene/?term=361709' target="_blank"> 361709 </a>	adaptor related protein complex 5 subunit beta 1	protein_coding	protein_coding	0.10917	1.07861	0.430581	0.649601	Not regulated	10.9	8.05	9.15	10.26	9.46	10.94	11.42
Ap5m1	<a href='https://www.ncbi.nlm.nih.gov/gene/?term=305861' target="_blank"> 305861 </a>	adaptor related protein complex 5 subunit mu 1	protein_coding	protein_coding	-0.11192	-1.08067	0.286747	0.512253	Not regulated	10.74	10.78	9.94	9.69	9.78	8.94	9.88
Ap5s1	<a href='https://www.ncbi.nlm.nih.gov/gene/?term=499893' target="_blank"> 499893 </a>	adaptor related protein complex 5 subunit sigma 1	protein_coding	protein_coding	-0.330694	-1.25762	0.0466406	0.159277	Not regulated	11.98	10.8	10	9.32	7.55	7.45	9.72
Apaf1	<a href='https://www.ncbi.nlm.nih.gov/gene/?term=78963' target="_blank"> 78963 </a>	apoptotic peptidase activating factor 1	protein_coding	protein_coding	0.0316576	1.02219	0.819923	0.913636	Not regulated	3.43	3.67	3.24	2.68	3.12	3.58	3.29
Apba1	<a href='https://www.ncbi.nlm.nih.gov/gene/?term=83589' target="_blank"> 83589 </a>	amyloid beta precursor protein binding family A member 1	protein_coding	protein_coding	-0.203884	-1.1518	0.573552	0.762355	Not regulated	0.84	1.14	0.77	0.85	0.45	1.11	0.76
Apba3	<a href='https://www.ncbi.nlm.nih.gov/gene/?term=83611' target="_blank"> 83611 </a>	amyloid beta precursor protein binding family A member 3	protein_coding	protein_coding	0.153363	1.11216	0.0824953	0.233012	Not regulated	50.69	58.39	57.51	56.89	66.62	59.45	60.46
Apbb1	<a href='https://www.ncbi.nlm.nih.gov/gene/?term=29722' target="_blank"> 29722 </a>	amyloid beta precursor protein binding family B member 1	protein_coding	protein_coding	-0.173609	-1.12788	0.347096	0.572361	Not regulated	3.4	3.32	3.9	2.59	2.76	3.38	3.14
Apbb1ip	<a href='https://www.ncbi.nlm.nih.gov/gene/?term=307171' target="_blank"> 307171 </a>	amyloid beta precursor protein binding family B member 1 interacting protein	protein_coding	protein_coding	0.45802	1.37366	0.139464	0.327208	Not regulated	2.03	1.77	1.9	1.06	1.57	3.25	2.2
Apbb3	<a href='https://www.ncbi.nlm.nih.gov/gene/?term=117026' target="_blank"> 117026 </a>	amyloid beta precursor protein binding family B member 3	protein_coding	protein_coding	-0.0513339	-1.03622	0.693123	0.839132	Not regulated	8.14	8.38	7.26	6.48	6.99	7.19	7.74
Apc	<a href='https://www.ncbi.nlm.nih.gov/gene/?term=24205' target="_blank"> 24205 </a>	APC regulator of WNT signaling pathway	protein_coding	protein_coding	-0.0639114	-1.0453	0.385262	0.607028	Not regulated	18.14	19.94	17.44	18.74	17.73	16.91	18.69
Apc2	<a href='https://www.ncbi.nlm.nih.gov/gene/?term=299611' target="_blank"> 299611 </a>	APC regulator of WNT signaling pathway 2	protein_coding	protein_coding	0.344196	1.26944	0.0958547	0.257211	Not regulated	1.33	1.31	1.52	1.95	2.31	1.95	1.52
Apcdd1	<a href='https://www.ncbi.nlm.nih.gov/gene/?term=689616' target="_blank"> 689616 </a>	APC down-regulated 1	protein_coding	protein_coding	-0.848028	-1.80004	3.36147e-08	1.80204e-06	Down in F_UVB_WT_MG	121.83	98.97	90.99	71.74	51.16	52.47	56.34
Apeh	<a href='https://www.ncbi.nlm.nih.gov/gene/?term=24206' target="_blank"> 24206 </a>	acylaminoacyl-peptide hydrolase	protein_coding	protein_coding	-0.125474	-1.09087	0.06203	0.192908	Not regulated	59.48	58.45	58.48	59.95	55.38	55.96	51.11
Apex1	<a href='https://www.ncbi.nlm.nih.gov/gene/?term=79116' target="_blank"> 79116 </a>	apurinic/apyrimidinic endodeoxyribonuclease 1	protein_coding	protein_coding	0.231694	1.17421	0.000998729	0.00893147	Not regulated	68.93	71.33	70.39	73.56	86.7	83.31	80.71
Apex2	<a href='https://www.ncbi.nlm.nih.gov/gene/?term=317628' target="_blank"> 317628 </a>	apurinic/apyrimidinic endodeoxyribonuclease 2	protein_coding	protein_coding	0.260856	1.19819	0.128142	0.310727	Not regulated	4.59	6.64	6.41	5.68	7.19	7.22	6.62
Aph1a	<a href='https://www.ncbi.nlm.nih.gov/gene/?term=365872' target="_blank"> 365872 </a>	aph-1 homolog A, gamma secretase subunit	protein_coding	protein_coding	0.0715281	1.05083	0.319344	0.544651	Not regulated	137.12	132.99	135.18	137.04	144.79	132.83	150.13
Aph1b	<a href='https://www.ncbi.nlm.nih.gov/gene/?term=300802' target="_blank"> 300802 </a>	aph-1 homolog B, gamma secretase subunit	protein_coding	protein_coding	0.26804	1.20417	0.262254	0.485922	Not regulated	4.7	4.52	5.36	3.87	4.16	5.99	6.56
Api5	<a href='https://www.ncbi.nlm.nih.gov/gene/?term=362170' target="_blank"> 362170 </a>	apoptosis inhibitor 5	protein_coding	protein_coding	0.0900825	1.06443	0.276154	0.49984	Not regulated	64.49	64.69	67.09	73.74	69.14	70.46	75.47
Apip	<a href='https://www.ncbi.nlm.nih.gov/gene/?term=295961' target="_blank"> 295961 </a>	APAF1 interacting protein	protein_coding	protein_coding	-0.0245423	-1.01716	0.858429	0.934966	Not regulated	14.8	15.99	14.82	17.96	16.42	16.1	14.4
Aplf	<a href='https://www.ncbi.nlm.nih.gov/gene/?term=500247' target="_blank"> 500247 </a>	aprataxin and PNKP like factor	protein_coding	protein_coding	-0.24261	-1.18313	0.219659	0.436226	Not regulated	7.09	7.68	6.45	5.23	6.79	4.42	5.53
Apln	<a href='https://www.ncbi.nlm.nih.gov/gene/?term=58812' target="_blank"> 58812 </a>	apelin	protein_coding	protein_coding	0.676823	1.59862	0.0504467	0.168341	Not regulated	0.71	0.98	0.87	0.8	0.96	2.09	1.04
Aplnr	<a href='https://www.ncbi.nlm.nih.gov/gene/?term=83518' target="_blank"> 83518 </a>	apelin receptor	protein_coding	protein_coding	0.420412	1.33831	0.121386	0.299479	Not regulated	3.26	2.36	5.47	4.87	5.71	5.41	4.95
Aplp1	<a href='https://www.ncbi.nlm.nih.gov/gene/?term=502317' target="_blank"> 502317 </a>	amyloid beta precursor like protein 1			0.0765704	1.05451	0.633534	0.803399	Not regulated	4.1	4.48	4.83	4.81	4.27	5.33	4.86
Aplp2	<a href='https://www.ncbi.nlm.nih.gov/gene/?term=64312' target="_blank"> 64312 </a>	amyloid beta precursor like protein 2	protein_coding	protein_coding	-0.0536556	-1.03789	0.58511	0.771063	Not regulated	174.92	147.18	166.14	146.47	138.96	153.77	166.57
Apmap	<a href='https://www.ncbi.nlm.nih.gov/gene/?term=366227' target="_blank"> 366227 </a>	adipocyte plasma membrane associated protein	protein_coding	protein_coding	0.205004	1.15269	0.0214235	0.0925567	Not regulated	148.68	171.18	147.92	172.16	189.99	171.93	191.82
Apobec1	<a href='https://www.ncbi.nlm.nih.gov/gene/?term=25383' target="_blank"> 25383 </a>	apolipoprotein B mRNA editing enzyme catalytic subunit 1	protein_coding	protein_coding	-0.390413	-1.31077	0.0707125	0.210941	Not regulated	16.85	20.2	16.98	11.29	13.69	13.66	10
Apobec2	<a href='https://www.ncbi.nlm.nih.gov/gene/?term=301226' target="_blank"> 301226 </a>	apolipoprotein B mRNA editing enzyme catalytic subunit 2	protein_coding	protein_coding	-0.90258	-1.86941	9.67917e-05	0.00140058	Down in F_UVB_WT_MG	57.08	77.52	79.39	54.79	35.67	49.46	23.11
Apobec3	<a href='https://www.ncbi.nlm.nih.gov/gene/?term=315137' target="_blank"> 315137 </a>	apolipoprotein B mRNA editing enzyme catalytic subunit 3			1.27653	2.42256	6.52858e-05	0.00101068	Up in F_UVB_WT_MG	4	2.1	2.01	1.63	5.66	7.38	4.9
Apobr	<a href='https://www.ncbi.nlm.nih.gov/gene/?term=499264' target="_blank"> 499264 </a>	apolipoprotein B receptor	protein_coding	protein_coding	-0.681533	-1.60384	0.0107236	0.0559884	Not regulated	1.95	2.35	1.62	1.56	1.14	1.3	1.76
Apod	<a href='https://www.ncbi.nlm.nih.gov/gene/?term=25239' target="_blank"> 25239 </a>	apolipoprotein D	protein_coding	protein_coding	1.05534	2.0782	1.6719e-07	6.96956e-06	Up in F_UVB_WT_MG	55.86	40.23	35.03	42.94	63.57	101.63	107.03
Apoe	<a href='https://www.ncbi.nlm.nih.gov/gene/?term=25728' target="_blank"> 25728 </a>	apolipoprotein E	protein_coding	protein_coding	-0.293689	-1.22577	0.0195836	0.0867498	Not regulated	7223.29	5923.86	5804.51	4717.4	4736.77	4910.65	4834.45
Apol11a	<a href='https://www.ncbi.nlm.nih.gov/gene/?term=300060' target="_blank"> 300060 </a>	apolipoprotein L 11a	protein_coding	protein_coding	-0.124453	-1.09009	0.723575	0.857441	Not regulated	0.97	1.62	1.46	1.3	1	1.21	1.5
Apol3	<a href='https://www.ncbi.nlm.nih.gov/gene/?term=315108' target="_blank"> 315108 </a>	apolipoprotein L, 3	protein_coding	protein_coding	0.13032	1.09454	0.553247	0.748507	Not regulated	4.63	4.09	4.2	3.85	3.47	4.84	5.47
Apol9a	<a href='https://www.ncbi.nlm.nih.gov/gene/?term=503164' target="_blank"> 503164 </a>	apolipoprotein L 9a	protein_coding	protein_coding	-0.243155	-1.18358	0.314172	0.538999	Not regulated	7.24	7.24	6.59	4.62	3.85	6.5	6.01
Apold1	<a href='https://www.ncbi.nlm.nih.gov/gene/?term=444983' target="_blank"> 444983 </a>	apolipoprotein L domain containing 1	protein_coding	protein_coding	-0.187351	-1.13867	0.762465	0.878874	Not regulated	4.64	8.97	1.86	2.21	3.03	5.18	2.84
Apom	<a href='https://www.ncbi.nlm.nih.gov/gene/?term=55939' target="_blank"> 55939 </a>	apolipoprotein M	protein_coding	protein_coding	0.21537	1.161	0.653346	0.814346	Not regulated	1.11	3.54	1.58	2.2	2.36	3.33	1.73
Apoo	<a href='https://www.ncbi.nlm.nih.gov/gene/?term=363474' target="_blank"> 363474 </a>	apolipoprotein O	protein_coding	protein_coding	0.0243135	1.017	0.828259	0.918683	Not regulated	37.19	37.99	37.24	33.76	33.53	41.94	36.68
Apool	<a href='https://www.ncbi.nlm.nih.gov/gene/?term=317191' target="_blank"> 317191 </a>	apolipoprotein O-like	protein_coding	protein_coding	-0.00495915	-1.00344	0.958381	0.980953	Not regulated	26.66	26.34	25.63	23.96	26.31	24.25	26.09
App	<a href='https://www.ncbi.nlm.nih.gov/gene/?term=54226' target="_blank"> 54226 </a>	amyloid beta precursor protein	protein_coding	protein_coding	-0.0792905	-1.0565	0.138993	0.326502	Not regulated	291.64	278.25	270.95	279.78	254.58	274.76	267.75
Appbp2	<a href='https://www.ncbi.nlm.nih.gov/gene/?term=303396' target="_blank"> 303396 </a>	amyloid beta precursor protein binding protein 2	protein_coding	protein_coding	-0.0322028	-1.02257	0.593585	0.776307	Not regulated	18.42	19.59	18.08	18.12	18.03	18.25	18.23
Appl1	<a href='https://www.ncbi.nlm.nih.gov/gene/?term=290537' target="_blank"> 290537 </a>	adaptor protein, phosphotyrosine interacting with PH domain and leucine zipper 1	protein_coding	protein_coding	-0.0392988	-1.02761	0.710311	0.8489	Not regulated	18.09	18.31	19.51	17.01	15.52	18.21	19.62
Appl2	<a href='https://www.ncbi.nlm.nih.gov/gene/?term=362860' target="_blank"> 362860 </a>	adaptor protein, phosphotyrosine interacting with PH domain and leucine zipper 2	protein_coding	protein_coding	-0.413302	-1.33173	0.0619828	0.192806	Not regulated	8.42	12.2	12.43	6.9	6.75	9.15	6.74
Aprt	<a href='https://www.ncbi.nlm.nih.gov/gene/?term=292072' target="_blank"> 292072 </a>	adenine phosphoribosyl transferase	protein_coding	protein_coding	0.337827	1.26385	0.00323594	0.0226601	Not regulated	228.57	297.5	250.27	298.92	361.92	330.98	326.69
Aptx	<a href='https://www.ncbi.nlm.nih.gov/gene/?term=259271' target="_blank"> 259271 </a>	aprataxin	protein_coding	protein_coding	-0.444366	-1.36072	0.000131488	0.00177335	Not regulated	10.47	10.19	9.85	9.75	6.57	8.08	7.66
Aqp1	<a href='https://www.ncbi.nlm.nih.gov/gene/?term=25240' target="_blank"> 25240 </a>	aquaporin 1	protein_coding	protein_coding	0.448822	1.36493	0.000137082	0.00183595	Not regulated	78.69	81.84	83.81	59.82	102.8	108.72	100.32
Aqp11	<a href='https://www.ncbi.nlm.nih.gov/gene/?term=286758' target="_blank"> 286758 </a>	aquaporin 11	protein_coding	protein_coding	0.0109822	1.00764	0.937213	0.971679	Not regulated	16.52	15.41	13.63	18.27	16.39	16.87	15.16
Aqp3	<a href='https://www.ncbi.nlm.nih.gov/gene/?term=65133' target="_blank"> 65133 </a>	aquaporin 3 (Gill blood group)	protein_coding	protein_coding	0.122789	1.08884	0.352267	0.57676	Not regulated	593.94	562.79	700.81	473.92	558.64	679.73	671.17
Aqp4	<a href='https://www.ncbi.nlm.nih.gov/gene/?term=25293' target="_blank"> 25293 </a>	aquaporin 4	protein_coding	protein_coding	-0.766282	-1.70088	0.0555062	0.179548	Not regulated	12.8	19.71	19.54	9.37	7.43	12.65	6.7
Aqp5	<a href='https://www.ncbi.nlm.nih.gov/gene/?term=25241' target="_blank"> 25241 </a>	aquaporin 5	protein_coding	protein_coding	0.161026	1.11808	0.570209	0.760137	Not regulated	2.88	2.52	2.75	1.99	1.73	3.66	3.18
Aqp9	<a href='https://www.ncbi.nlm.nih.gov/gene/?term=65054' target="_blank"> 65054 </a>	aquaporin 9	protein_coding	protein_coding	-0.85068	-1.80335	0.0449063	0.155188	Not regulated	9.38	5.06	8.46	3.8	1.48	4.43	5.28
Aqr	<a href='https://www.ncbi.nlm.nih.gov/gene/?term=366163' target="_blank"> 366163 </a>	aquarius intron-binding spliceosomal factor	protein_coding	protein_coding	0.128245	1.09296	0.152777	0.346931	Not regulated	17.88	17.66	17.2	20.05	19.57	18.98	21.11
Ar	<a href='https://www.ncbi.nlm.nih.gov/gene/?term=24208' target="_blank"> 24208 </a>	androgen receptor	protein_coding	protein_coding	-0.227183	-1.17055	0.00713919	0.0409211	Not regulated	18.79	19.88	16.57	17.82	15.55	16.18	15.17
Araf	<a href='https://www.ncbi.nlm.nih.gov/gene/?term=64363' target="_blank"> 64363 </a>	A-Raf proto-oncogene, serine/threonine kinase	protein_coding	protein_coding	-0.157473	-1.11533	0.0336931	0.127432	Not regulated	67.8	69.13	63.11	64.03	60.57	59.5	54.37
Arap1	<a href='https://www.ncbi.nlm.nih.gov/gene/?term=361617' target="_blank"> 361617 </a>	ArfGAP with RhoGAP domain, ankyrin repeat and PH domain 1	protein_coding	protein_coding	-0.282959	-1.21669	0.000122646	0.00168495	Not regulated	33.99	34.17	34.58	34	27.84	30.76	25.92
Arap2	<a href='https://www.ncbi.nlm.nih.gov/gene/?term=305367' target="_blank"> 305367 </a>	ArfGAP with RhoGAP domain, ankyrin repeat and PH domain 2	protein_coding	protein_coding	-0.173224	-1.12758	0.0242503	0.101028	Not regulated	24.08	23.45	25.54	22.94	19.95	21.46	22.58
Arap3	<a href='https://www.ncbi.nlm.nih.gov/gene/?term=361314' target="_blank"> 361314 </a>	ArfGAP with RhoGAP domain, ankyrin repeat and PH domain 3	protein_coding	protein_coding	0.293911	1.22596	0.0443399	0.154192	Not regulated	2.37	2.65	2.62	2.25	2.82	3.5	2.78
Arc	<a href='https://www.ncbi.nlm.nih.gov/gene/?term=54323' target="_blank"> 54323 </a>	activity-regulated cytoskeleton-associated protein	protein_coding	protein_coding	0.0582614	1.04121	0.912324	0.960053	Not regulated	0.75	1.44	0.24	0.92	1.16	0.53	0.91
Arcn1	<a href='https://www.ncbi.nlm.nih.gov/gene/?term=300674' target="_blank"> 300674 </a>	archain 1	protein_coding	protein_coding	0.014884	1.01037	0.783262	0.890088	Not regulated	116.86	119.48	118.15	121.69	123.03	118.97	119.25
Areg	<a href='https://www.ncbi.nlm.nih.gov/gene/?term=29183' target="_blank"> 29183 </a>	amphiregulin	protein_coding	protein_coding	0.841987	1.79252	0.0195184	0.0865475	Not regulated	1.79	2.91	4.49	3.53	4.27	8.27	4.74
Arel1	<a href='https://www.ncbi.nlm.nih.gov/gene/?term=299197' target="_blank"> 299197 </a>	apoptosis resistant E3 ubiquitin protein ligase 1	protein_coding	protein_coding	-0.0796745	-1.05678	0.240846	0.461427	Not regulated	21.58	22.57	21.13	22.85	21.25	21.41	19.99
Arf1	<a href='https://www.ncbi.nlm.nih.gov/gene/?term=64310' target="_blank"> 64310 </a>	ADP-ribosylation factor 1	protein_coding	protein_coding	0.0746721	1.05312	0.225862	0.443062	Not regulated	486.45	499.4	523.68	526.33	544.96	539.73	525.9
Arf2	<a href='https://www.ncbi.nlm.nih.gov/gene/?term=79119' target="_blank"> 79119 </a>	ADP-ribosylation factor 2	protein_coding	protein_coding	0.279281	1.21359	0.0235453	0.0989448	Not regulated	12.72	12.75	15.07	15.26	17.66	17.57	15.64
Arf4	<a href='https://www.ncbi.nlm.nih.gov/gene/?term=79120' target="_blank"> 79120 </a>	ADP-ribosylation factor 4	protein_coding	protein_coding	0.0154853	1.01079	0.843126	0.92576	Not regulated	142.83	137.81	150.47	154.06	145.36	158.74	140.57
Arf5	<a href='https://www.ncbi.nlm.nih.gov/gene/?term=79117' target="_blank"> 79117 </a>	ADP-ribosylation factor 5	protein_coding	protein_coding	0.0962996	1.06903	0.0739153	0.217029	Not regulated	265.35	272.76	270.05	274.7	284.79	301.28	283.65
Arfgap1	<a href='https://www.ncbi.nlm.nih.gov/gene/?term=246310' target="_blank"> 246310 </a>	ADP-ribosylation factor GTPase activating protein 1	protein_coding	protein_coding	-0.0513931	-1.03627	0.554503	0.749216	Not regulated	50.05	54.98	54.05	51.6	55.8	48.68	47.28
Arfgap2	<a href='https://www.ncbi.nlm.nih.gov/gene/?term=362162' target="_blank"> 362162 </a>	ADP-ribosylation factor GTPase activating protein 2	protein_coding	protein_coding	-0.178773	-1.13192	0.00407055	0.0269707	Not regulated	110.81	116.2	105.96	117.94	100.13	99.13	99.93
Arfgap3	<a href='https://www.ncbi.nlm.nih.gov/gene/?term=503165' target="_blank"> 503165 </a>	ADP-ribosylation factor GTPase activating protein 3	protein_coding	protein_coding	-0.0681602	-1.04838	0.567394	0.757802	Not regulated	21.78	20.26	21.48	17.8	19.67	21.73	17.05
Arfgef1	<a href='https://www.ncbi.nlm.nih.gov/gene/?term=312915' target="_blank"> 312915 </a>	ADP ribosylation factor guanine nucleotide exchange factor 1	protein_coding	protein_coding	-0.0548782	-1.03877	0.42063	0.64036	Not regulated	38.43	39.72	38.28	40.33	39.37	36.02	36.85
Arfgef2	<a href='https://www.ncbi.nlm.nih.gov/gene/?term=296380' target="_blank"> 296380 </a>	ADP ribosylation factor guanine nucleotide exchange factor 2	protein_coding	protein_coding	0.0291089	1.02038	0.759743	0.877383	Not regulated	18.15	20.31	17.15	20.36	20.69	18.18	19.29
Arfgef3	<a href='https://www.ncbi.nlm.nih.gov/gene/?term=292947' target="_blank"> 292947 </a>	ARFGEF family member 3			-0.41256	-1.33105	0.0205065	0.0895973	Not regulated	1.89	1.83	1.94	1.4	1.44	1.56	1.14
Arfip1	<a href='https://www.ncbi.nlm.nih.gov/gene/?term=60382' target="_blank"> 60382 </a>	ADP-ribosylation factor interacting protein 1	protein_coding	protein_coding	0.0408263	1.0287	0.696587	0.841651	Not regulated	20.81	22.69	25.57	23.22	21.4	24.93	25.34
Arfip2	<a href='https://www.ncbi.nlm.nih.gov/gene/?term=293344' target="_blank"> 293344 </a>	ADP-ribosylation factor interacting protein 2	protein_coding	protein_coding	0.0262475	1.01836	0.77053	0.883806	Not regulated	37.92	39.9	37.64	33.35	37.41	37.19	34.88
Arfrp1	<a href='https://www.ncbi.nlm.nih.gov/gene/?term=117051' target="_blank"> 117051 </a>	ADP-ribosylation factor related protein 1	protein_coding	protein_coding	-0.353717	-1.27785	0.000172025	0.0022081	Not regulated	48.84	49.83	54.11	46.71	40.34	39.56	36.86
Arg1	<a href='https://www.ncbi.nlm.nih.gov/gene/?term=29221' target="_blank"> 29221 </a>	arginase 1	protein_coding	protein_coding	-0.580743	-1.49562	0.0125093	0.0624903	Not regulated	29.93	25.89	32.93	23.82	12.39	27.22	17.28
Arg2	<a href='https://www.ncbi.nlm.nih.gov/gene/?term=29215' target="_blank"> 29215 </a>	arginase 2	protein_coding	protein_coding	1.15989	2.2344	0.00376554	0.0254184	Up in F_UVB_WT_MG	0.72	1.18	1.77	1.16	2.82	1.75	2.95
Arglu1	<a href='https://www.ncbi.nlm.nih.gov/gene/?term=290912' target="_blank"> 290912 </a>	arginine and glutamate rich 1	protein_coding	protein_coding	0.0667778	1.04737	0.479249	0.689026	Not regulated	42	42.71	39.98	45.64	48.17	41.99	43.6
Arhgap1	<a href='https://www.ncbi.nlm.nih.gov/gene/?term=311193' target="_blank"> 311193 </a>	Rho GTPase activating protein 1	protein_coding	protein_coding	0.0366226	1.02571	0.652264	0.813472	Not regulated	55.05	49.45	52.14	48.68	52.09	50.15	55.8
Arhgap10	<a href='https://www.ncbi.nlm.nih.gov/gene/?term=688429' target="_blank"> 688429 </a>	Rho GTPase activating protein 10	protein_coding	protein_coding	-0.174327	-1.12844	0.0505538	0.16853	Not regulated	26.53	27.78	25.52	22.62	21.62	23.39	22.93
Arhgap11a	<a href='https://www.ncbi.nlm.nih.gov/gene/?term=296060' target="_blank"> 296060 </a>	Rho GTPase activating protein 11A	protein_coding	protein_coding	0.670738	1.59189	8.17203e-09	5.1996e-07	Up in F_UVB_WT_MG	8.96	9.14	9.41	8.59	12.9	16.91	13.17
Arhgap12	<a href='https://www.ncbi.nlm.nih.gov/gene/?term=307016' target="_blank"> 307016 </a>	Rho GTPase activating protein 12	protein_coding	protein_coding	-0.13699	-1.09961	0.18132	0.385814	Not regulated	17.66	18.95	16.25	16.18	15.46	14.14	17.34
Arhgap15	<a href='https://www.ncbi.nlm.nih.gov/gene/?term=295635' target="_blank"> 295635 </a>	Rho GTPase activating protein 15	protein_coding	protein_coding	0.191982	1.14233	0.729517	0.86041	Not regulated	0.8	0.91	0.41	0.78	0.33	0.94	1.22
Arhgap17	<a href='https://www.ncbi.nlm.nih.gov/gene/?term=63994' target="_blank"> 63994 </a>	Rho GTPase activating protein 17	protein_coding	protein_coding	-0.0780577	-1.0556	0.358468	0.581613	Not regulated	24.26	25.97	24.93	23.6	22.16	24.9	25.38
Arhgap18	<a href='https://www.ncbi.nlm.nih.gov/gene/?term=293947' target="_blank"> 293947 </a>	Rho GTPase activating protein 18	protein_coding	protein_coding	0.0812491	1.05793	0.73233	0.862072	Not regulated	6.32	5.44	5.79	3.64	4.19	7.11	5.62
Arhgap19	<a href='https://www.ncbi.nlm.nih.gov/gene/?term=679082' target="_blank"> 679082 </a>	Rho GTPase activating protein 19	protein_coding	protein_coding	0.145902	1.10642	0.49267	0.701598	Not regulated	4.98	5.55	5.2	5.18	5.03	8.12	4.7
Arhgap20	<a href='https://www.ncbi.nlm.nih.gov/gene/?term=367085' target="_blank"> 367085 </a>	Rho GTPase activating protein 20	protein_coding	protein_coding	-0.476115	-1.39099	0.0163889	0.0760712	Not regulated	10.66	21.2	15.96	19.18	12.54	11.99	11.72
Arhgap21	<a href='https://www.ncbi.nlm.nih.gov/gene/?term=307178' target="_blank"> 307178 </a>	Rho GTPase activating protein 21	protein_coding	protein_coding	0.0818646	1.05839	0.267215	0.490751	Not regulated	18.08	19.24	18.22	17.95	20.11	18.17	20.08
Arhgap22	<a href='https://www.ncbi.nlm.nih.gov/gene/?term=306279' target="_blank"> 306279 </a>	Rho GTPase activating protein 22	protein_coding	protein_coding	1.05363	2.07575	0.000272248	0.00322958	Up in F_UVB_WT_MG	1.64	1.72	1.57	1.36	2.64	2.41	4.36
Arhgap23	<a href='https://www.ncbi.nlm.nih.gov/gene/?term=303501' target="_blank"> 303501 </a>	Rho GTPase activating protein 23	protein_coding	protein_coding	-0.07694	-1.05478	0.381963	0.604468	Not regulated	28.71	24.82	24.44	23.64	23.13	24.8	24.39
Arhgap24	<a href='https://www.ncbi.nlm.nih.gov/gene/?term=305156' target="_blank"> 305156 </a>	Rho GTPase activating protein 24	protein_coding	protein_coding	-0.257323	-1.19526	8.8777e-06	0.000193217	Not regulated	44.61	47.42	45.61	44.6	37.3	39.14	38.01
Arhgap25	<a href='https://www.ncbi.nlm.nih.gov/gene/?term=500246' target="_blank"> 500246 </a>	Rho GTPase activating protein 25	protein_coding	protein_coding	0.381014	1.30226	0.123241	0.302893	Not regulated	1.55	1.06	1.19	0.9	1.37	1.55	1.8
Arhgap26	<a href='https://www.ncbi.nlm.nih.gov/gene/?term=307459' target="_blank"> 307459 </a>	Rho GTPase activating protein 26	protein_coding	protein_coding	-0.12766	-1.09252	0.68553	0.834283	Not regulated	0.82	0.95	0.68	0.82	0.4	0.89	0.83
Arhgap27	<a href='https://www.ncbi.nlm.nih.gov/gene/?term=303583' target="_blank"> 303583 </a>	Rho GTPase activating protein 27	protein_coding	protein_coding	-0.183104	-1.13532	0.0153999	0.0726199	Not regulated	23.94	20.99	22.03	20.91	18.55	20.09	19.41
Arhgap28	<a href='https://www.ncbi.nlm.nih.gov/gene/?term=301709' target="_blank"> 301709 </a>	Rho GTPase activating protein 28	protein_coding	protein_coding	-0.112853	-1.08136	0.300493	0.52526	Not regulated	13.79	15.75	13.18	12.84	12.01	14.29	12.44
Arhgap29	<a href='https://www.ncbi.nlm.nih.gov/gene/?term=310833' target="_blank"> 310833 </a>	Rho GTPase activating protein 29	protein_coding	protein_coding	-0.171369	-1.12613	0.204765	0.417185	Not regulated	9.34	10.33	10.93	8.45	7.1	9.79	9.34
Arhgap30	<a href='https://www.ncbi.nlm.nih.gov/gene/?term=498282' target="_blank"> 498282 </a>	Rho GTPase activating protein 30	protein_coding	protein_coding	-0.163145	-1.11973	0.0237055	0.0992558	Not regulated	9.11	9.61	8.97	9.12	7.95	8.08	8.64
Arhgap31	<a href='https://www.ncbi.nlm.nih.gov/gene/?term=288093' target="_blank"> 288093 </a>	Rho GTPase activating protein 31	protein_coding	protein_coding	0.0540443	1.03817	0.750215	0.871679	Not regulated	5.92	7.36	6.56	4.42	5.77	6.95	6.24
Arhgap32	<a href='https://www.ncbi.nlm.nih.gov/gene/?term=315530' target="_blank"> 315530 </a>	Rho GTPase activating protein 32	protein_coding	protein_coding	-0.207881	-1.15499	0.022702	0.0963278	Not regulated	38.11	34.21	35.81	32.49	32	27.92	31.31
Arhgap33	<a href='https://www.ncbi.nlm.nih.gov/gene/?term=100362311' target="_blank"> 100362311 </a>	Rho GTPase activating protein 33	protein_coding	protein_coding	0.139544	1.10156	0.506799	0.71402	Not regulated	1.71	1.86	1.51	1.28	1.44	2.06	1.76
Arhgap35	<a href='https://www.ncbi.nlm.nih.gov/gene/?term=306400' target="_blank"> 306400 </a>	Rho GTPase activating protein 35	protein_coding	protein_coding	0.138997	1.10114	0.0124046	0.062032	Not regulated	17.45	17.68	17.28	17.12	19.35	19.07	19.07
Arhgap39	<a href='https://www.ncbi.nlm.nih.gov/gene/?term=500901' target="_blank"> 500901 </a>	Rho GTPase activating protein 39	protein_coding	protein_coding	-0.121816	-1.0881	0.256224	0.479281	Not regulated	10.92	11.13	9.41	12.02	10	10.58	9.44
Arhgap4	<a href='https://www.ncbi.nlm.nih.gov/gene/?term=246249' target="_blank"> 246249 </a>	Rho GTPase activating protein 4	protein_coding	protein_coding	0.103462	1.07435	0.549998	0.746472	Not regulated	1.43	1.29	1.4	1.16	1.23	1.64	1.43
Arhgap40	<a href='https://www.ncbi.nlm.nih.gov/gene/?term=296323' target="_blank"> 296323 </a>	Rho GTPase activating protein 40	protein_coding	protein_coding	-1.00805	-2.0112	5.12488e-07	1.73411e-05	Down in F_UVB_WT_MG	12.38	16.76	15.82	11.96	5.14	6.97	9.16
Arhgap42	<a href='https://www.ncbi.nlm.nih.gov/gene/?term=500943' target="_blank"> 500943 </a>	Rho GTPase activating protein 42	protein_coding	protein_coding	0.0207239	1.01447	0.905474	0.95705	Not regulated	3.44	3.11	3.5	3.27	2.53	3.9	3.48
Arhgap44	<a href='https://www.ncbi.nlm.nih.gov/gene/?term=303222' target="_blank"> 303222 </a>	Rho GTPase activating protein 44	protein_coding	protein_coding	-1.02528	-2.03536	8.77083e-07	2.74434e-05	Down in F_UVB_WT_MG	12.2	9.6	9.6	6	4.28	4.33	5.12
Arhgap45	<a href='https://www.ncbi.nlm.nih.gov/gene/?term=314618' target="_blank"> 314618 </a>	Rho GTPase activating protein 45			0.150936	1.11029	0.557268	0.751577	Not regulated	3.97	2.72	3.46	2.15	2.39	4.07	4.02
Arhgap5	<a href='https://www.ncbi.nlm.nih.gov/gene/?term=299012' target="_blank"> 299012 </a>	Rho GTPase activating protein 5	protein_coding	protein_coding	-0.0179659	-1.01253	0.867626	0.940011	Not regulated	16.94	19.59	20.31	22.07	18.27	19.27	21.02
Arhgap6	<a href='https://www.ncbi.nlm.nih.gov/gene/?term=100363276' target="_blank"> 100363276 </a>	Rho GTPase activating protein 6	protein_coding	protein_coding	-0.357777	-1.28145	0.128588	0.311492	Not regulated	1.61	2.84	2	1.85	1.56	1.76	1.58
Arhgap8	<a href='https://www.ncbi.nlm.nih.gov/gene/?term=300115' target="_blank"> 300115 </a>	Rho GTPase activating protein 8	protein_coding	protein_coding	0.421117	1.33896	0.00662246	0.0386421	Not regulated	9.86	14.05	11.65	12.18	17.66	14.54	15.76
Arhgap9	<a href='https://www.ncbi.nlm.nih.gov/gene/?term=362893' target="_blank"> 362893 </a>	Rho GTPase activating protein 9	protein_coding	protein_coding	0.178125	1.13141	0.615602	0.792188	Not regulated	3.04	8.17	2.85	5.08	7.1	3.96	5.16
Arhgdia	<a href='https://www.ncbi.nlm.nih.gov/gene/?term=360678' target="_blank"> 360678 </a>	Rho GDP dissociation inhibitor alpha	protein_coding	protein_coding	0.0368713	1.02589	0.525085	0.728491	Not regulated	344.16	333.15	354.6	348.21	345.97	370.25	347.13
Arhgdib	<a href='https://www.ncbi.nlm.nih.gov/gene/?term=362456' target="_blank"> 362456 </a>	Rho GDP dissociation inhibitor beta	protein_coding	protein_coding	-0.138157	-1.1005	0.494519	0.703252	Not regulated	47.65	41.91	41.64	32.09	24.79	44.36	42.77
Arhgef1	<a href='https://www.ncbi.nlm.nih.gov/gene/?term=60323' target="_blank"> 60323 </a>	Rho guanine nucleotide exchange factor 1	protein_coding	protein_coding	0.207699	1.15485	0.0278226	0.111193	Not regulated	53.44	62.68	60.19	51.35	66.31	60.99	69.53
Arhgef10	<a href='https://www.ncbi.nlm.nih.gov/gene/?term=306618' target="_blank"> 306618 </a>	Rho guanine nucleotide exchange factor 10	protein_coding	protein_coding	-0.344006	-1.26928	0.0327217	0.124842	Not regulated	9.73	8.38	9.59	7.72	5.49	8.69	6.86
Arhgef10l	<a href='https://www.ncbi.nlm.nih.gov/gene/?term=684811' target="_blank"> 684811 </a>	Rho guanine nucleotide exchange factor 10 like	protein_coding	protein_coding	-0.26577	-1.20228	0.0407816	0.145237	Not regulated	15.41	15.67	16.24	13.43	10.62	15.32	12.27
Arhgef11	<a href='https://www.ncbi.nlm.nih.gov/gene/?term=78966' target="_blank"> 78966 </a>	Rho guanine nucleotide exchange factor 11	protein_coding	protein_coding	0.0410273	1.02885	0.617329	0.79324	Not regulated	18.65	19.28	17.66	16.18	18.37	19.54	17.35
Arhgef12	<a href='https://www.ncbi.nlm.nih.gov/gene/?term=367072' target="_blank"> 367072 </a>	Rho guanine nucleotide exchange factor 12	protein_coding	protein_coding	0.119029	1.086	0.0757567	0.220304	Not regulated	32.83	35.75	33.36	31.83	35.78	35.36	38.2
Arhgef15	<a href='https://www.ncbi.nlm.nih.gov/gene/?term=287418' target="_blank"> 287418 </a>	Rho guanine nucleotide exchange factor 15	protein_coding	protein_coding	0.358998	1.28253	0.0286266	0.113465	Not regulated	2.93	2.95	3.03	3.1	3.37	4.77	3.43
Arhgef16	<a href='https://www.ncbi.nlm.nih.gov/gene/?term=687105' target="_blank"> 687105 </a>	Rho guanine nucleotide exchange factor 16	protein_coding	protein_coding	-0.348659	-1.27338	0.00116087	0.0100307	Not regulated	21.72	25.57	21.43	23.26	19.39	18.84	16.03
Arhgef17	<a href='https://www.ncbi.nlm.nih.gov/gene/?term=308862' target="_blank"> 308862 </a>	Rho guanine nucleotide exchange factor 17	protein_coding	protein_coding	-0.0457274	-1.0322	0.709094	0.848666	Not regulated	9.73	9.23	10.31	10.45	7.75	10.41	9.81
Arhgef18	<a href='https://www.ncbi.nlm.nih.gov/gene/?term=304193' target="_blank"> 304193 </a>	Rho/Rac guanine nucleotide exchange factor 18	protein_coding	protein_coding	-0.136075	-1.09891	0.0436358	0.152262	Not regulated	16.37	17.36	15.72	16.48	15.18	15.35	14.5
Arhgef19	<a href='https://www.ncbi.nlm.nih.gov/gene/?term=362648' target="_blank"> 362648 </a>	Rho guanine nucleotide exchange factor 19	protein_coding	protein_coding	-0.254242	-1.19271	0.00610507	0.0365497	Not regulated	17.92	16.49	17.25	15.74	13.57	13.68	15.15
Arhgef2	<a href='https://www.ncbi.nlm.nih.gov/gene/?term=310635' target="_blank"> 310635 </a>	Rho/Rac guanine nucleotide exchange factor 2	protein_coding	protein_coding	0.247107	1.18682	0.043857	0.152793	Not regulated	10.04	8.87	9.25	8.42	9.39	12.65	10.75
Arhgef25	<a href='https://www.ncbi.nlm.nih.gov/gene/?term=314904' target="_blank"> 314904 </a>	Rho guanine nucleotide exchange factor 25	protein_coding	protein_coding	-0.0762934	-1.05431	0.645512	0.810196	Not regulated	8.88	8.2	9.43	6.79	6.37	8.92	8.19
Arhgef26	<a href='https://www.ncbi.nlm.nih.gov/gene/?term=310460' target="_blank"> 310460 </a>	Rho guanine nucleotide exchange factor 26	protein_coding	protein_coding	-0.380364	-1.30167	0.0363839	0.13421	Not regulated	2.7	2.86	2.89	2.16	1.65	2.17	2.32
Arhgef28	<a href='https://www.ncbi.nlm.nih.gov/gene/?term=361882' target="_blank"> 361882 </a>	Rho guanine nucleotide exchange factor 28	protein_coding	protein_coding	-0.288454	-1.22133	0.026836	0.10824	Not regulated	8.42	6.92	6.76	5.99	5.58	5.63	6
Arhgef3	<a href='https://www.ncbi.nlm.nih.gov/gene/?term=290541' target="_blank"> 290541 </a>	Rho guanine nucleotide exchange factor 3	protein_coding	protein_coding	-0.0219298	-1.01532	0.862026	0.936675	Not regulated	16.25	16.23	15.46	12.23	12.84	15.79	15.81
Arhgef33	<a href='https://www.ncbi.nlm.nih.gov/gene/?term=500608' target="_blank"> 500608 </a>	Rho guanine nucleotide exchange factor 33	protein_coding	protein_coding	0.0347523	1.02438	0.818808	0.91326	Not regulated	3	2.5	2.52	2.8	2.76	2.9	2.66
Arhgef37	<a href='https://www.ncbi.nlm.nih.gov/gene/?term=307398' target="_blank"> 307398 </a>	Rho guanine nucleotide exchange factor 37	protein_coding	protein_coding	-0.246398	-1.18624	0.036242	0.133948	Not regulated	9.44	9.81	10.53	8.32	7.9	7.44	8.76
Arhgef39	<a href='https://www.ncbi.nlm.nih.gov/gene/?term=298404' target="_blank"> 298404 </a>	Rho guanine nucleotide exchange factor 39	protein_coding	protein_coding	0.0959483	1.06877	0.713621	0.851479	Not regulated	2.93	3.23	4.98	2.88	3.59	4.11	3.6
Arhgef4	<a href='https://www.ncbi.nlm.nih.gov/gene/?term=301334' target="_blank"> 301334 </a>	Rho guanine nucleotide exchange factor 4	protein_coding	protein_coding	-0.0520447	-1.03673	0.548983	0.745926	Not regulated	21.22	21.42	20.01	17.72	19.12	18.81	20.26
Arhgef40	<a href='https://www.ncbi.nlm.nih.gov/gene/?term=361034' target="_blank"> 361034 </a>	Rho guanine nucleotide exchange factor 40	protein_coding	protein_coding	-0.196903	-1.14623	0.0431607	0.151199	Not regulated	8.34	8.53	8.07	7.25	6.7	8.11	6.78
Arhgef5	<a href='https://www.ncbi.nlm.nih.gov/gene/?term=140898' target="_blank"> 140898 </a>	Rho guanine nucleotide exchange factor 5	protein_coding	protein_coding	-0.0737569	-1.05245	0.321851	0.547872	Not regulated	39.06	37.99	38.07	41.69	37.61	35.5	38.72
Arhgef6	<a href='https://www.ncbi.nlm.nih.gov/gene/?term=363509' target="_blank"> 363509 </a>	Rac/Cdc42 guanine nucleotide exchange factor 6	protein_coding	protein_coding	-0.132028	-1.09583	0.607734	0.786459	Not regulated	3.81	2.96	3.57	1.73	2.42	3.08	2.63
Arhgef7	<a href='https://www.ncbi.nlm.nih.gov/gene/?term=114559' target="_blank"> 114559 </a>	Rho guanine nucleotide exchange factor 7	protein_coding	protein_coding	-0.0878041	-1.06275	0.203176	0.415028	Not regulated	27.21	29.92	25.73	28.05	25.83	26.97	25.74
Arhgef9	<a href='https://www.ncbi.nlm.nih.gov/gene/?term=66013' target="_blank"> 66013 </a>	Cdc42 guanine nucleotide exchange factor 9	processed_transcript	processed_transcript	-0.215461	-1.16107	0.57802	0.765898	Not regulated	1.08	1.36	1.07	0.71	0.62	1.38	0.59
Arid1a	<a href='https://www.ncbi.nlm.nih.gov/gene/?term=297867' target="_blank"> 297867 </a>	AT-rich interaction domain 1A	protein_coding	protein_coding	-0.147231	-1.10744	0.0135949	0.0664408	Not regulated	26.44	26.77	24.94	25.18	22.81	24.91	22.42
Arid1b	<a href='https://www.ncbi.nlm.nih.gov/gene/?term=282546' target="_blank"> 282546 </a>	AT-rich interaction domain 1B	protein_coding	protein_coding	-0.112277	-1.08093	0.0468238	0.159575	Not regulated	33.9	33.49	31.29	31.48	30.24	31.51	28.87
Arid2	<a href='https://www.ncbi.nlm.nih.gov/gene/?term=366980' target="_blank"> 366980 </a>	AT-rich interaction domain 2	protein_coding	protein_coding	-0.0366155	-1.0257	0.702568	0.844428	Not regulated	15.97	18.41	16.45	15.59	17.6	14.9	16.06
Arid3a	<a href='https://www.ncbi.nlm.nih.gov/gene/?term=314616' target="_blank"> 314616 </a>	AT-rich interaction domain 3A	protein_coding	protein_coding	0.212606	1.15878	0.204017	0.415979	Not regulated	11.85	14.18	11.18	14.74	14.76	12.68	16.46
Arid3b	<a href='https://www.ncbi.nlm.nih.gov/gene/?term=367092' target="_blank"> 367092 </a>	AT-rich interaction domain 3B	protein_coding	protein_coding	-0.369664	-1.29205	0.178972	0.383187	Not regulated	0.99	0.82	1.96	1.01	1.19	0.74	1.12
Arid4a	<a href='https://www.ncbi.nlm.nih.gov/gene/?term=314205' target="_blank"> 314205 </a>	AT-rich interaction domain 4A	protein_coding	protein_coding	-0.129384	-1.09383	0.173978	0.376556	Not regulated	13.18	13.21	11.26	11.51	11.16	10.78	11.61
Arid4b	<a href='https://www.ncbi.nlm.nih.gov/gene/?term=84481' target="_blank"> 84481 </a>	AT-rich interaction domain 4B	protein_coding	protein_coding	-0.192952	-1.1431	0.0201755	0.0886334	Not regulated	11.68	12.64	11.48	12.04	9.59	10.54	11.23
Arid5a	<a href='https://www.ncbi.nlm.nih.gov/gene/?term=316327' target="_blank"> 316327 </a>	AT-rich interaction domain 5A	protein_coding	protein_coding	0.492945	1.40731	0.0232741	0.0981603	Not regulated	5.33	5.62	4.24	3.33	5.89	8.01	5.89
Arid5b	<a href='https://www.ncbi.nlm.nih.gov/gene/?term=309728' target="_blank"> 309728 </a>	AT-rich interaction domain 5B	processed_transcript	processed_transcript	-0.0275149	-1.01925	0.75199	0.872978	Not regulated	20.02	18.68	17.34	17.35	18.25	17.99	17.04
Arih1	<a href='https://www.ncbi.nlm.nih.gov/gene/?term=300756' target="_blank"> 300756 </a>	ariadne RBR E3 ubiquitin protein ligase 1	protein_coding	protein_coding	-0.0735887	-1.05233	0.435216	0.653733	Not regulated	45	59.22	51.26	56.6	54.64	49.5	54.42
Arih2	<a href='https://www.ncbi.nlm.nih.gov/gene/?term=316005' target="_blank"> 316005 </a>	ariadne RBR E3 ubiquitin protein ligase 2	protein_coding	protein_coding	0.0144829	1.01009	0.853129	0.932082	Not regulated	34.94	34.64	33.27	35.89	37.21	32.93	34.98
Arl1	<a href='https://www.ncbi.nlm.nih.gov/gene/?term=64187' target="_blank"> 64187 </a>	ADP-ribosylation factor like GTPase 1	protein_coding	protein_coding	-0.0159506	-1.01112	0.815881	0.9115	Not regulated	169.6	164.42	176	176.37	175.47	165.64	167.94
Arl10	<a href='https://www.ncbi.nlm.nih.gov/gene/?term=306767' target="_blank"> 306767 </a>	ADP-ribosylation factor like GTPase 10	protein_coding	protein_coding	-0.131658	-1.09555	0.447541	0.664516	Not regulated	3.63	3.4	3.73	3.65	2.85	3.93	3.16
Arl11	<a href='https://www.ncbi.nlm.nih.gov/gene/?term=364396' target="_blank"> 364396 </a>	ADP-ribosylation factor like GTPase 11	protein_coding	protein_coding	0.617222	1.53392	0.16835	0.369175	Not regulated	2.84	1.04	1.57	0.66	1.88	1.99	2.95
Arl13b	<a href='https://www.ncbi.nlm.nih.gov/gene/?term=304037' target="_blank"> 304037 </a>	ADP-ribosylation factor like GTPase 13B	protein_coding	protein_coding	-0.751236	-1.68323	5.56707e-06	0.000132672	Down in F_UVB_WT_MG	10.81	10.37	9.51	8.07	4.3	6.54	6.56
Arl14ep	<a href='https://www.ncbi.nlm.nih.gov/gene/?term=311279' target="_blank"> 311279 </a>	ADP-ribosylation factor like GTPase 14 effector protein	protein_coding	protein_coding	0.00357764	1.00248	0.97466	0.988721	Not regulated	13.86	13.15	13.14	13.47	14.67	12.12	13.45
Arl16	<a href='https://www.ncbi.nlm.nih.gov/gene/?term=688311' target="_blank"> 688311 </a>	ADP-ribosylation factor like GTPase 16	protein_coding	protein_coding	0.026877	1.0188	0.844607	0.927081	Not regulated	13.6	13.22	15.45	13.36	13.74	14.96	13.9
Arl2	<a href='https://www.ncbi.nlm.nih.gov/gene/?term=65142' target="_blank"> 65142 </a>	ADP-ribosylation factor like GTPase 2	protein_coding	protein_coding	-0.0558949	-1.0395	0.70989	0.8489	Not regulated	42.23	41.28	42.38	37.95	46.83	41.82	30.87
Arl2bp	<a href='https://www.ncbi.nlm.nih.gov/gene/?term=498910' target="_blank"> 498910 </a>	ADP-ribosylation factor like GTPase 2 binding protein	protein_coding	protein_coding	-0.113709	-1.08201	0.223277	0.439937	Not regulated	54.96	53.89	54.61	47.23	50	56.13	48.21
Arl3	<a href='https://www.ncbi.nlm.nih.gov/gene/?term=64664' target="_blank"> 64664 </a>	ADP ribosylation factor like GTPase 3	protein_coding	protein_coding	-0.149915	-1.1095	0.296163	0.520814	Not regulated	32.25	34.92	38.82	32.54	31.54	35.11	25.05
Arl4d	<a href='https://www.ncbi.nlm.nih.gov/gene/?term=303559' target="_blank"> 303559 </a>	ADP-ribosylation factor like GTPase 4D	protein_coding	protein_coding	0.220082	1.1648	0.0524031	0.172497	Not regulated	15.34	13.86	12.86	14.71	16.87	16.85	15.35
Arl5a	<a href='https://www.ncbi.nlm.nih.gov/gene/?term=117050' target="_blank"> 117050 </a>	ADP-ribosylation factor like GTPase 5A	protein_coding	protein_coding	-0.0190716	-1.01331	0.861174	0.93653	Not regulated	39.97	43.24	43.98	53.14	43.25	45.32	45.17
Arl6	<a href='https://www.ncbi.nlm.nih.gov/gene/?term=363760' target="_blank"> 363760 </a>	ADP-ribosylation factor like GTPase 6	protein_coding	protein_coding	-0.204368	-1.15218	0.249851	0.47289	Not regulated	8.19	9.6	10.16	10.4	6.71	9.21	8.91
Arl6ip1	<a href='https://www.ncbi.nlm.nih.gov/gene/?term=293551' target="_blank"> 293551 </a>	ADP-ribosylation factor like GTPase 6 interacting protein 1	protein_coding	protein_coding	-0.0433867	-1.03053	0.656031	0.815903	Not regulated	99.56	100.78	107.11	120.63	107.42	108.26	96.47
Arl6ip4	<a href='https://www.ncbi.nlm.nih.gov/gene/?term=288656' target="_blank"> 288656 </a>	ADP-ribosylation factor like GTPase 6 interacting protein 4	protein_coding	protein_coding	0.195349	1.145	0.0544675	0.177093	Not regulated	45.12	50.97	44.28	52.49	58.37	51.72	53.88
Arl6ip5	<a href='https://www.ncbi.nlm.nih.gov/gene/?term=66028' target="_blank"> 66028 </a>	ADP-ribosylation factor like GTPase 6 interacting protein 5	protein_coding	protein_coding	-0.248617	-1.18807	0.00441988	0.028657	Not regulated	62.3	63.3	66.14	59.04	51.1	58.53	49.17
Arl6ip6	<a href='https://www.ncbi.nlm.nih.gov/gene/?term=499798' target="_blank"> 499798 </a>	ADP ribosylation factor like GTPase 6 interacting protein 6	protein_coding	protein_coding	0.093022	1.0666	0.353983	0.57789	Not regulated	8.32	8.22	8.29	8.97	9.03	8.73	9.25
Arl8a	<a href='https://www.ncbi.nlm.nih.gov/gene/?term=498234' target="_blank"> 498234 </a>	ADP-ribosylation factor like GTPase 8A	protein_coding	protein_coding	-0.0713695	-1.05071	0.291746	0.516537	Not regulated	69.37	69.07	68.03	71.74	67.97	64.93	65.79
Arl8b	<a href='https://www.ncbi.nlm.nih.gov/gene/?term=500282' target="_blank"> 500282 </a>	ADP-ribosylation factor like GTPase 8B	protein_coding	protein_coding	-0.130819	-1.09492	0.0939421	0.253756	Not regulated	250.33	256.53	267.18	288.77	239.81	243.81	247.13
Armc1	<a href='https://www.ncbi.nlm.nih.gov/gene/?term=294948' target="_blank"> 294948 </a>	armadillo repeat containing 1	protein_coding	protein_coding	0.0351364	1.02465	0.717286	0.854113	Not regulated	16.13	14.83	14.03	16.43	15.25	16.04	15.94
Armc10	<a href='https://www.ncbi.nlm.nih.gov/gene/?term=296758' target="_blank"> 296758 </a>	armadillo repeat containing 10	protein_coding	protein_coding	0.270115	1.2059	0.0131832	0.0649298	Not regulated	12.21	11.24	12.34	11.72	13.92	14.26	14.79
Armc2	<a href='https://www.ncbi.nlm.nih.gov/gene/?term=499470' target="_blank"> 499470 </a>	armadillo repeat containing 2	protein_coding	protein_coding	-0.412273	-1.33078	0.027519	0.110192	Not regulated	1.87	1.88	1.91	1.4	1.3	1.6	1.35
Armc5	<a href='https://www.ncbi.nlm.nih.gov/gene/?term=361653' target="_blank"> 361653 </a>	armadillo repeat containing 5	protein_coding	protein_coding	-0.107193	-1.07713	0.179846	0.384499	Not regulated	21.14	21	20.61	18.64	18.35	19.18	19.24
Armc6	<a href='https://www.ncbi.nlm.nih.gov/gene/?term=306352' target="_blank"> 306352 </a>	armadillo repeat containing 6	protein_coding	protein_coding	0.293882	1.22593	0.0245782	0.102074	Not regulated	9.39	9.65	9.78	8.99	11.4	13.48	10.03
Armc7	<a href='https://www.ncbi.nlm.nih.gov/gene/?term=287827' target="_blank"> 287827 </a>	armadillo repeat containing 7	protein_coding	protein_coding	0.0391476	1.02751	0.795187	0.897886	Not regulated	6.11	5.39	4.85	5.08	5.57	5.12	5.8
Armc8	<a href='https://www.ncbi.nlm.nih.gov/gene/?term=315949' target="_blank"> 315949 </a>	armadillo repeat containing 8	protein_coding	protein_coding	0.091937	1.0658	0.375162	0.597689	Not regulated	28.4	25.87	21.74	24.99	28.97	25.86	26.55
Armc9	<a href='https://www.ncbi.nlm.nih.gov/gene/?term=301579' target="_blank"> 301579 </a>	armadillo repeat containing 9	protein_coding	protein_coding	0.0273632	1.01915	0.85155	0.931482	Not regulated	7.24	4.98	4.82	5.61	5.34	6.52	5.7
Armcx2	<a href='https://www.ncbi.nlm.nih.gov/gene/?term=367903' target="_blank"> 367903 </a>	armadillo repeat containing, X-linked 2	protein_coding	protein_coding	0.161157	1.11818	0.586672	0.772127	Not regulated	1.02	1.13	1.09	0.93	0.88	1.69	0.98
Armcx3	<a href='https://www.ncbi.nlm.nih.gov/gene/?term=367902' target="_blank"> 367902 </a>	armadillo repeat containing, X-linked 3	protein_coding	protein_coding	0.130402	1.0946	0.318919	0.544134	Not regulated	8.13	10.28	9.69	8.84	8.89	12.72	10.58
Armcx4	<a href='https://www.ncbi.nlm.nih.gov/gene/?term=100359678' target="_blank"> 100359678 </a>	armadillo repeat containing, X-linked 4	protein_coding	protein_coding	0.843798	1.79477	4.36903e-05	0.000725336	Up in F_UVB_WT_MG	1.22	1.15	1.15	1.13	1.62	2.84	1.89
Armcx5	<a href='https://www.ncbi.nlm.nih.gov/gene/?term=102552920' target="_blank"> 102552920 </a>	armadillo repeat containing, X-linked 5	protein_coding	protein_coding	-0.0377307	-1.0265	0.806332	0.904403	Not regulated	3.69	3.53	3.73	4.34	3.61	3.71	3.81
Armcx6	<a href='https://www.ncbi.nlm.nih.gov/gene/?term=363496' target="_blank"> 363496 </a>	armadillo repeat containing, X-linked 6	protein_coding	protein_coding	0.08441	1.06025	0.831317	0.919844	Not regulated	0.94	0.68	1	0.77	0.6	1.02	1.08
Armh3	<a href='https://www.ncbi.nlm.nih.gov/gene/?term=103689959' target="_blank"> 103689959 </a>	armadillo-like helical domain containing 3			0.0500021	1.03527	0.557948	0.751961	Not regulated	20.38	22.22	19.92	22	22.99	21.46	21.11
Armh4	<a href='https://www.ncbi.nlm.nih.gov/gene/?term=361032' target="_blank"> 361032 </a>	armadillo-like helical domain containing 4			-1.52151	-2.87092	0.00011909	0.00164451	Down in F_UVB_WT_MG	0.76	0.91	0.94	0.95	0.26	0.5	0.2
Armt1	<a href='https://www.ncbi.nlm.nih.gov/gene/?term=292267' target="_blank"> 292267 </a>	acidic residue methyltransferase 1			0.102401	1.07356	0.372561	0.594684	Not regulated	9.22	8.44	8.08	8.87	9.21	10.53	9.01
Arnt	<a href='https://www.ncbi.nlm.nih.gov/gene/?term=25242' target="_blank"> 25242 </a>	aryl hydrocarbon receptor nuclear translocator	protein_coding	protein_coding	-0.0989776	-1.07101	0.109341	0.27951	Not regulated	31.68	33.58	31.35	32.99	30.55	30.51	31.06
Arnt2	<a href='https://www.ncbi.nlm.nih.gov/gene/?term=25243' target="_blank"> 25243 </a>	aryl hydrocarbon receptor nuclear translocator 2	protein_coding	protein_coding	-0.364176	-1.28715	0.00195588	0.0152101	Not regulated	10.98	12.44	10.75	12.93	10.37	8.39	8.65
Arntl	<a href='https://www.ncbi.nlm.nih.gov/gene/?term=29657' target="_blank"> 29657 </a>	aryl hydrocarbon receptor nuclear translocator-like	protein_coding	protein_coding	-0.145952	-1.10646	0.0996135	0.263457	Not regulated	21.34	24.14	25.36	23.87	20.93	20.54	21.92
Arntl2	<a href='https://www.ncbi.nlm.nih.gov/gene/?term=362464' target="_blank"> 362464 </a>	aryl hydrocarbon receptor nuclear translocator-like 2	protein_coding	protein_coding	0.415471	1.33373	0.0533326	0.174684	Not regulated	2.8	2.97	3.83	3.49	3.79	5.31	4.25
Arpc1a	<a href='https://www.ncbi.nlm.nih.gov/gene/?term=81824' target="_blank"> 81824 </a>	actin related protein 2/3 complex, subunit 1A	protein_coding	protein_coding	-0.0079853	-1.00555	0.877054	0.944125	Not regulated	174.26	187.66	179.08	176.52	166.3	170.85	178.14
Arpc1b	<a href='https://www.ncbi.nlm.nih.gov/gene/?term=54227' target="_blank"> 54227 </a>	actin related protein 2/3 complex, subunit 1B	protein_coding	protein_coding	0.13475	1.0979	0.0518625	0.171346	Not regulated	223.91	205.27	197.26	196.31	222.31	235.78	223.13
Arpc2	<a href='https://www.ncbi.nlm.nih.gov/gene/?term=301511' target="_blank"> 301511 </a>	actin related protein 2/3 complex, subunit 2	protein_coding	protein_coding	0.0253984	1.01776	0.715705	0.853276	Not regulated	314.81	300.66	310.25	284.14	285.56	318.93	322.55
Arpc3	<a href='https://www.ncbi.nlm.nih.gov/gene/?term=288669' target="_blank"> 288669 </a>	actin related protein 2/3 complex, subunit 3	protein_coding	protein_coding	0.118509	1.08561	0.0349139	0.130674	Not regulated	289.79	276.67	268.01	272.73	295.81	303.21	303.97
Arpc4	<a href='https://www.ncbi.nlm.nih.gov/gene/?term=297518' target="_blank"> 297518 </a>	actin related protein 2/3 complex, subunit 4	protein_coding	protein_coding	0.0745441	1.05303	0.242203	0.462768	Not regulated	128.68	133.67	139.51	135.06	140.41	146.59	136.9
Arpc5	<a href='https://www.ncbi.nlm.nih.gov/gene/?term=360854' target="_blank"> 360854 </a>	actin related protein 2/3 complex, subunit 5	protein_coding	protein_coding	0.0489122	1.03448	0.502301	0.71052	Not regulated	220.43	188.54	210.83	215.04	207.68	230.8	219.93
Arpc5l	<a href='https://www.ncbi.nlm.nih.gov/gene/?term=296710' target="_blank"> 296710 </a>	actin related protein 2/3 complex, subunit 5-like	protein_coding	protein_coding	-0.0572099	-1.04045	0.436709	0.655088	Not regulated	188.17	189.87	193.63	197.93	197.36	179.79	177.85
Arpin	<a href='https://www.ncbi.nlm.nih.gov/gene/?term=308765' target="_blank"> 308765 </a>	actin-related protein 2/3 complex inhibitor	protein_coding	protein_coding	0.0833972	1.05951	0.410268	0.62992	Not regulated	16.52	16.97	14.72	15.41	17.13	16.5	17.02
Arpp21	<a href='https://www.ncbi.nlm.nih.gov/gene/?term=363153' target="_blank"> 363153 </a>	cAMP regulated phosphoprotein 21	protein_coding	protein_coding	0.204032	1.15191	0.436603	0.655077	Not regulated	1.9	2.29	2.07	2.07	1.66	2.97	2.15
Arrb1	<a href='https://www.ncbi.nlm.nih.gov/gene/?term=25387' target="_blank"> 25387 </a>	arrestin, beta 1	protein_coding	protein_coding	-0.0767716	-1.05466	0.739907	0.86609	Not regulated	4.38	4.47	5.32	3.64	3.18	5.11	4.52
Arrb2	<a href='https://www.ncbi.nlm.nih.gov/gene/?term=25388' target="_blank"> 25388 </a>	arrestin, beta 2	protein_coding	protein_coding	-0.0851994	-1.06083	0.671389	0.824406	Not regulated	6.93	4.68	5.16	4.24	4.46	5.43	5.17
Arrdc1	<a href='https://www.ncbi.nlm.nih.gov/gene/?term=366001' target="_blank"> 366001 </a>	arrestin domain containing 1	protein_coding	protein_coding	-0.117861	-1.08512	0.130542	0.314256	Not regulated	47.99	51.57	47.56	45.75	46.1	44.89	42.49
Arrdc2	<a href='https://www.ncbi.nlm.nih.gov/gene/?term=306344' target="_blank"> 306344 </a>	arrestin domain containing 2	protein_coding	protein_coding	-0.22934	-1.1723	0.349673	0.57428	Not regulated	5.56	6.21	3.98	4.33	3.75	3.34	5.73
Arrdc3	<a href='https://www.ncbi.nlm.nih.gov/gene/?term=309945' target="_blank"> 309945 </a>	arrestin domain containing 3	protein_coding	protein_coding	-0.417583	-1.33569	0.000431773	0.00464916	Not regulated	55.36	58.03	44.96	44.54	35.47	37.59	36.33
Arrdc4	<a href='https://www.ncbi.nlm.nih.gov/gene/?term=293019' target="_blank"> 293019 </a>	arrestin domain containing 4	protein_coding	protein_coding	-0.729117	-1.65762	5.41159e-05	0.000870174	Down in F_UVB_WT_MG	19.81	23.62	14.93	15.6	9.89	9.94	13.61
Arsa	<a href='https://www.ncbi.nlm.nih.gov/gene/?term=315222' target="_blank"> 315222 </a>	arylsulfatase A	protein_coding	protein_coding	0.111441	1.08031	0.0992511	0.26288	Not regulated	35.86	39.36	36.82	37.04	41.36	41.48	38.16
Arsb	<a href='https://www.ncbi.nlm.nih.gov/gene/?term=25227' target="_blank"> 25227 </a>	arylsulfatase B	protein_coding	protein_coding	-0.118884	-1.08589	0.25039	0.473364	Not regulated	14.86	14.56	13.47	12.81	12.45	14.45	11.7
Arse	<a href='https://www.ncbi.nlm.nih.gov/gene/?term=310326' target="_blank"> 310326 </a>	arylsulfatase E	protein_coding	protein_coding	-0.130816	-1.09491	0.083182	0.234107	Not regulated	85.13	91.1	87.63	92.08	82.32	87.29	74.7
Arsg	<a href='https://www.ncbi.nlm.nih.gov/gene/?term=303631' target="_blank"> 303631 </a>	arylsulfatase G	protein_coding	protein_coding	-0.397286	-1.31703	0.00279767	0.020089	Not regulated	10.29	9.69	9.06	8.17	7.63	6.69	5.7
Arsi	<a href='https://www.ncbi.nlm.nih.gov/gene/?term=307404' target="_blank"> 307404 </a>	arylsulfatase family, member I	protein_coding	protein_coding	0.632377	1.55012	0.0304318	0.11819	Not regulated	2.81	5.46	3.22	2.82	3.6	6.19	6.9
Arsk	<a href='https://www.ncbi.nlm.nih.gov/gene/?term=365619' target="_blank"> 365619 </a>	arylsulfatase family, member K	protein_coding	protein_coding	-0.401458	-1.32084	0.000494296	0.00516946	Not regulated	14.46	15.55	13.93	12.94	11.3	11.74	9.34
Art1	<a href='https://www.ncbi.nlm.nih.gov/gene/?term=308873' target="_blank"> 308873 </a>	ADP-ribosyltransferase 1	protein_coding	protein_coding	0.250905	1.18995	0.374167	0.596532	Not regulated	10.29	12.93	13.51	12.25	13.42	22.31	8.28
Art3	<a href='https://www.ncbi.nlm.nih.gov/gene/?term=305235' target="_blank"> 305235 </a>	ADP-ribosyltransferase 3	protein_coding	protein_coding	0.505871	1.41998	0.0557376	0.180084	Not regulated	10.77	12.77	14.02	10.16	17.62	24.27	10
Art4	<a href='https://www.ncbi.nlm.nih.gov/gene/?term=312806' target="_blank"> 312806 </a>	ADP-ribosyltransferase 4	protein_coding	protein_coding	-0.498817	-1.41305	0.0151365	0.0717923	Not regulated	5.29	4.48	5.88	3.97	3.87	2.92	3.59
Art5	<a href='https://www.ncbi.nlm.nih.gov/gene/?term=259167' target="_blank"> 259167 </a>	ADP-ribosyltransferase 5	protein_coding	protein_coding	-0.0554843	-1.03921	0.91614	0.961777	Not regulated	0.8	0.96	0.92	0.5	0.62	1.36	0.34
Artn	<a href='https://www.ncbi.nlm.nih.gov/gene/?term=362572' target="_blank"> 362572 </a>	artemin	protein_coding	protein_coding	0.524775	1.43871	0.266462	0.490051	Not regulated	1.01	0.86	1.09	0.94	0.83	1.12	2.26
Arv1	<a href='https://www.ncbi.nlm.nih.gov/gene/?term=292097' target="_blank"> 292097 </a>	ARV1 homolog, fatty acid homeostasis modulator	protein_coding	protein_coding	0.14114	1.10278	0.382779	0.604967	Not regulated	10.58	8.51	9.34	10.46	10.43	11.21	10.5
Arvcf	<a href='https://www.ncbi.nlm.nih.gov/gene/?term=303798' target="_blank"> 303798 </a>	ARVCF, delta catenin family member	protein_coding	protein_coding	-0.153208	-1.11204	0.137382	0.323863	Not regulated	20.9	18.53	18.81	16.53	17.34	17.44	15.72
As3mt	<a href='https://www.ncbi.nlm.nih.gov/gene/?term=140925' target="_blank"> 140925 </a>	arsenite methyltransferase	protein_coding	protein_coding	-0.0050691	-1.00352	0.974485	0.988721	Not regulated	23.94	16.67	19.77	22.92	22.34	18.5	21.35
Asah1	<a href='https://www.ncbi.nlm.nih.gov/gene/?term=84431' target="_blank"> 84431 </a>	N-acylsphingosine amidohydrolase 1	protein_coding	protein_coding	-0.109696	-1.079	0.440047	0.65907	Not regulated	153.73	169.34	128.77	184.24	152.44	124.02	165.43
Asah2	<a href='https://www.ncbi.nlm.nih.gov/gene/?term=114104' target="_blank"> 114104 </a>	N-acylsphingosine amidohydrolase 2	protein_coding	protein_coding	0.146808	1.10712	0.47766	0.687512	Not regulated	1.35	1.24	1.43	1.18	1.51	1.17	1.62
Asap1	<a href='https://www.ncbi.nlm.nih.gov/gene/?term=314961' target="_blank"> 314961 </a>	ArfGAP with SH3 domain, ankyrin repeat and PH domain 1	protein_coding	protein_coding	0.132609	1.09627	0.253759	0.476824	Not regulated	12.45	10.71	12.27	10.59	11.12	12.93	13.84
Asap2	<a href='https://www.ncbi.nlm.nih.gov/gene/?term=362719' target="_blank"> 362719 </a>	ArfGAP with SH3 domain, ankyrin repeat and PH domain 2	protein_coding	protein_coding	-0.178268	-1.13152	0.0459029	0.157563	Not regulated	11.01	9.91	10.58	9.39	8.6	9.25	9.15
Asap3	<a href='https://www.ncbi.nlm.nih.gov/gene/?term=684122' target="_blank"> 684122 </a>	ArfGAP with SH3 domain, ankyrin repeat and PH domain 3			-0.115572	-1.0834	0.266473	0.490051	Not regulated	8.5	9.09	7.72	9.32	8.06	8.16	7.77
Asb1	<a href='https://www.ncbi.nlm.nih.gov/gene/?term=316628' target="_blank"> 316628 </a>	ankyrin repeat and SOCS box-containing 1	protein_coding	protein_coding	-0.0588178	-1.04161	0.81764	0.912775	Not regulated	2.29	3.22	2.61	2.46	2.62	2.03	2.53
Asb10	<a href='https://www.ncbi.nlm.nih.gov/gene/?term=499972' target="_blank"> 499972 </a>	ankyrin repeat and SOCS box-containing 10	protein_coding	protein_coding	-0.249046	-1.18842	0.657295	0.816583	Not regulated	1.01	1.85	1.22	1.17	0.66	2.14	0.46
Asb12	<a href='https://www.ncbi.nlm.nih.gov/gene/?term=503446' target="_blank"> 503446 </a>	ankyrin repeat and SOCS box-containing 12	protein_coding	protein_coding	-0.0547722	-1.0387	0.892111	0.950204	Not regulated	1.29	2.61	3.04	1.73	2.3	2.61	1.64
Asb13	<a href='https://www.ncbi.nlm.nih.gov/gene/?term=361268' target="_blank"> 361268 </a>	ankyrin repeat and SOCS box-containing 13	protein_coding	protein_coding	-0.0956008	-1.06851	0.457956	0.672889	Not regulated	9.98	9.82	10.45	9.45	8.78	8.04	10.97
Asb14	<a href='https://www.ncbi.nlm.nih.gov/gene/?term=680076' target="_blank"> 680076 </a>	ankyrin repeat and SOCS box-containing 14	protein_coding	protein_coding	-0.42549	-1.34303	0.220315	0.43695	Not regulated	1.51	1.18	1.6	1.1	0.88	1.37	0.79
Asb15	<a href='https://www.ncbi.nlm.nih.gov/gene/?term=500050' target="_blank"> 500050 </a>	ankyrin repeat and SOCS box containing 15	protein_coding	protein_coding	2.15721	4.46051	0.00618526	0.0368345	Up in F_UVB_WT_MG	0.17	0.25	0.21	0.05	0.23	0.33	1.72
Asb16	<a href='https://www.ncbi.nlm.nih.gov/gene/?term=498005' target="_blank"> 498005 </a>	ankyrin repeat and SOCS box-containing 16	protein_coding	protein_coding	-0.412343	-1.33085	0.391249	0.611975	Not regulated	1.41	2.44	2.06	1.29	1.07	2.41	0.66
Asb2	<a href='https://www.ncbi.nlm.nih.gov/gene/?term=299266' target="_blank"> 299266 </a>	ankyrin repeat and SOCS box-containing 2	protein_coding	protein_coding	-0.44135	-1.35787	8.72761e-06	0.000190888	Not regulated	63.35	81.89	77.97	68.33	53.57	53.74	53.93
Asb3	<a href='https://www.ncbi.nlm.nih.gov/gene/?term=364227' target="_blank"> 364227 </a>	ankyrin repeat and SOCS box-containing 3	protein_coding	protein_coding	-0.0151079	-1.01053	0.92089	0.963645	Not regulated	7.52	7.85	8.63	6.85	7.94	6.72	8.21
Asb5	<a href='https://www.ncbi.nlm.nih.gov/gene/?term=361187' target="_blank"> 361187 </a>	ankyrin repeat and SOCS box-containing 5	protein_coding	protein_coding	0.339651	1.26545	0.383289	0.605275	Not regulated	1.75	2.3	2.2	2.12	2.08	4.41	1.41
Asb6	<a href='https://www.ncbi.nlm.nih.gov/gene/?term=296627' target="_blank"> 296627 </a>	ankyrin repeat and SOCS box-containing 6	protein_coding	protein_coding	0.0806875	1.05752	0.408769	0.628344	Not regulated	17.87	18.63	16.97	19.15	20.19	18.39	18.71
Asb7	<a href='https://www.ncbi.nlm.nih.gov/gene/?term=365277' target="_blank"> 365277 </a>	ankyrin repeat and SOCS box-containing 7	protein_coding	protein_coding	-0.148057	-1.10808	0.27947	0.503576	Not regulated	8.04	9.13	7.82	8.14	6.58	8.98	7.14
Asb8	<a href='https://www.ncbi.nlm.nih.gov/gene/?term=315287' target="_blank"> 315287 </a>	ankyrin repeat and SOCS box-containing 8	protein_coding	protein_coding	0.139328	1.10139	0.122176	0.300815	Not regulated	37.73	39.54	40.76	41.87	47.15	44.59	40.5
Asb9	<a href='https://www.ncbi.nlm.nih.gov/gene/?term=367785' target="_blank"> 367785 </a>	ankyrin repeat and SOCS box-containing 9	protein_coding	protein_coding	-0.378847	-1.3003	0.220457	0.436971	Not regulated	1.95	2.93	3.47	2.89	2.52	1.83	1.92
Ascc1	<a href='https://www.ncbi.nlm.nih.gov/gene/?term=294512' target="_blank"> 294512 </a>	activating signal cointegrator 1 complex subunit 1	protein_coding	protein_coding	0.0441558	1.03108	0.667091	0.822581	Not regulated	33.44	28.68	27.58	28.62	29.9	29.42	32.78
Ascc2	<a href='https://www.ncbi.nlm.nih.gov/gene/?term=498402' target="_blank"> 498402 </a>	activating signal cointegrator 1 complex subunit 2	protein_coding	protein_coding	0.0632958	1.04485	0.566881	0.757436	Not regulated	19.56	22.68	20.91	25.55	22.18	23.73	23.86
Ascc3	<a href='https://www.ncbi.nlm.nih.gov/gene/?term=309887' target="_blank"> 309887 </a>	activating signal cointegrator 1 complex subunit 3	protein_coding	protein_coding	0.0127322	1.00886	0.823393	0.915738	Not regulated	22.76	22.6	21.27	22.1	22.54	22.51	21.49
Ascl2	<a href='https://www.ncbi.nlm.nih.gov/gene/?term=24209' target="_blank"> 24209 </a>	achaete-scute family bHLH transcription factor 2	protein_coding	protein_coding	-0.146383	-1.10679	0.617454	0.793319	Not regulated	2.09	1.58	2.19	1.91	1.8	1.57	1.87
Asf1a	<a href='https://www.ncbi.nlm.nih.gov/gene/?term=294408' target="_blank"> 294408 </a>	anti-silencing function 1A histone chaperone	protein_coding	protein_coding	-0.0316996	-1.02222	0.751481	0.872539	Not regulated	8.14	8.74	9.16	9.31	8.62	8.63	8.71
Asf1b	<a href='https://www.ncbi.nlm.nih.gov/gene/?term=304648' target="_blank"> 304648 </a>	anti-silencing function 1B histone chaperone	protein_coding	protein_coding	0.981421	1.97441	5.4985e-07	1.82798e-05	Up in F_UVB_WT_MG	7.61	6.58	7.55	6.74	13.38	18.26	10.89
Asgr2	<a href='https://www.ncbi.nlm.nih.gov/gene/?term=29403' target="_blank"> 29403 </a>	asialoglycoprotein receptor 2	protein_coding	protein_coding	0.571429	1.48599	0.0916382	0.249893	Not regulated	1.67	2.52	2.18	1.74	1.93	4.31	3
Ash1l	<a href='https://www.ncbi.nlm.nih.gov/gene/?term=310638' target="_blank"> 310638 </a>	ASH1 like histone lysine methyltransferase	protein_coding	protein_coding	-0.147433	-1.1076	0.0247706	0.102684	Not regulated	21.82	22.85	20.65	20.29	19.64	18.7	19.21
Ash2l	<a href='https://www.ncbi.nlm.nih.gov/gene/?term=290829' target="_blank"> 290829 </a>	ASH2 like histone lysine methyltransferase complex subunit	protein_coding	protein_coding	-0.0728868	-1.05182	0.346099	0.571304	Not regulated	31.93	33.4	33.91	32.95	28.98	34.24	31.39
Asic1	<a href='https://www.ncbi.nlm.nih.gov/gene/?term=79123' target="_blank"> 79123 </a>	acid sensing ion channel subunit 1	protein_coding	protein_coding	-1.13367	-2.19416	0.151044	0.344448	Not regulated	1.02	0.44	0.91	0.59	0	0.5	0.51
Asic2	<a href='https://www.ncbi.nlm.nih.gov/gene/?term=25364' target="_blank"> 25364 </a>	acid sensing ion channel subunit 2	protein_coding	protein_coding	-1.2959	-2.4553	0.0023872	0.0177545	Down in F_UVB_WT_MG	1.64	1.8	1.27	1.09	0.41	0.39	0.98
Asl	<a href='https://www.ncbi.nlm.nih.gov/gene/?term=59085' target="_blank"> 59085 </a>	argininosuccinate lyase	protein_coding	protein_coding	0.0428986	1.03018	0.740739	0.866345	Not regulated	11.81	10.51	9.52	8.48	9.36	10.76	10.61
Asmtl	<a href='https://www.ncbi.nlm.nih.gov/gene/?term=288527' target="_blank"> 288527 </a>	acetylserotonin O-methyltransferase-like	protein_coding	protein_coding	0.0638649	1.04526	0.609529	0.787688	Not regulated	53.17	54.98	52.17	51.42	55.72	46.16	63.56
Asns	<a href='https://www.ncbi.nlm.nih.gov/gene/?term=25612' target="_blank"> 25612 </a>	asparagine synthetase (glutamine-hydrolyzing)	protein_coding	protein_coding	0.0688781	1.0489	0.520399	0.72418	Not regulated	20.67	20.05	16.95	21.55	20.83	20.08	21.43
Asnsd1	<a href='https://www.ncbi.nlm.nih.gov/gene/?term=299507' target="_blank"> 299507 </a>	asparagine synthetase domain containing 1	protein_coding	protein_coding	0.0233061	1.01629	0.792198	0.895576	Not regulated	25.17	24.97	28.18	26.48	27.04	26.09	26.82
Aspa	<a href='https://www.ncbi.nlm.nih.gov/gene/?term=79251' target="_blank"> 79251 </a>	aspartoacylase	protein_coding	protein_coding	-0.503787	-1.41793	0.117814	0.294193	Not regulated	1.56	2.86	1.36	1.95	1.17	1.4	1.55
Aspg	<a href='https://www.ncbi.nlm.nih.gov/gene/?term=246266' target="_blank"> 246266 </a>	asparaginase	protein_coding	protein_coding	0.523621	1.43756	0.00106096	0.00937452	Up in F_UVB_WT_MG	11.83	15.41	12.8	13.89	16.74	17.13	24.32
Asph	<a href='https://www.ncbi.nlm.nih.gov/gene/?term=312981' target="_blank"> 312981 </a>	aspartate-beta-hydroxylase	protein_coding	protein_coding	0.00933953	1.00649	0.931248	0.969221	Not regulated	13.74	12.12	12.43	11.53	10.98	12.93	13.54
Asphd2	<a href='https://www.ncbi.nlm.nih.gov/gene/?term=364948' target="_blank"> 364948 </a>	aspartate beta-hydroxylase domain containing 2	protein_coding	protein_coding	-1.09985	-2.14332	0.000923704	0.00841329	Down in F_UVB_WT_MG	2.15	1.82	1.6	2.81	0.85	0.94	1.14
Aspm	<a href='https://www.ncbi.nlm.nih.gov/gene/?term=289054' target="_blank"> 289054 </a>	assembly factor for spindle microtubules	protein_coding	protein_coding	0.657408	1.57725	2.86076e-05	0.000516179	Up in F_UVB_WT_MG	3.8	3.84	4.31	3.27	5.23	7.62	5.25
Aspnl1	<a href='https://www.ncbi.nlm.nih.gov/gene/?term=NA' target="_blank"> NA </a>				-0.245392	-1.18541	0.211856	0.426663	Not regulated	14.98	11.19	11.32	10.71	8.14	9.61	12.73
Aspscr1	<a href='https://www.ncbi.nlm.nih.gov/gene/?term=691026' target="_blank"> 691026 </a>	ASPSCR1 tether for SLC2A4, UBX domain containing	protein_coding	protein_coding	0.0729399	1.05186	0.428122	0.647172	Not regulated	51.4	47.67	48.14	54.27	57.13	51.01	51.47
Asrgl1	<a href='https://www.ncbi.nlm.nih.gov/gene/?term=246307' target="_blank"> 246307 </a>	asparaginase and isoaspartyl peptidase 1	protein_coding	protein_coding	-0.0302366	-1.02118	0.934724	0.970939	Not regulated	1.94	0.97	1.39	1	1.02	1.74	1.22
Ass1	<a href='https://www.ncbi.nlm.nih.gov/gene/?term=25698' target="_blank"> 25698 </a>	argininosuccinate synthase 1	protein_coding	protein_coding	0.279352	1.21365	0.119275	0.296099	Not regulated	20.57	15.17	15.72	21.7	25.21	18.56	22.71
Aste1	<a href='https://www.ncbi.nlm.nih.gov/gene/?term=363130' target="_blank"> 363130 </a>	asteroid homolog 1	protein_coding	protein_coding	-0.107461	-1.07733	0.546971	0.744116	Not regulated	4.5	5.38	5.57	4.09	5.81	4.59	4.7
Astn1	<a href='https://www.ncbi.nlm.nih.gov/gene/?term=304900' target="_blank"> 304900 </a>	astrotactin 1	processed_transcript	processed_transcript	-0.146186	-1.10664	0.737553	0.865013	Not regulated	0.15	0.35	0.21	0.17	0.16	0.24	0.2
Astn2	<a href='https://www.ncbi.nlm.nih.gov/gene/?term=100361323' target="_blank"> 100361323 </a>	astrotactin 2	protein_coding	protein_coding	-1.01471	-2.0205	0.00737087	0.0420497	Down in F_UVB_WT_MG	0.67	0.48	0.43	0.27	0.16	0.26	0.28
Asxl1	<a href='https://www.ncbi.nlm.nih.gov/gene/?term=311553' target="_blank"> 311553 </a>	ASXL transcriptional regulator 1	protein_coding	protein_coding	0.00775456	1.00539	0.922664	0.964666	Not regulated	10.61	10.63	9.78	9.53	9.82	9.93	10.67
Asxl2	<a href='https://www.ncbi.nlm.nih.gov/gene/?term=313922' target="_blank"> 313922 </a>	ASXL transcriptional regulator 2	protein_coding	protein_coding	-0.132959	-1.09654	0.168574	0.369368	Not regulated	12.57	14.72	12.1	12.57	11.91	11.12	12.52
Atad1	<a href='https://www.ncbi.nlm.nih.gov/gene/?term=309532' target="_blank"> 309532 </a>	ATPase family, AAA domain containing 1	protein_coding	protein_coding	-0.0346061	-1.02428	0.625085	0.797689	Not regulated	29.1	30.37	28.92	29.95	30.04	29.58	27.23
Atad2	<a href='https://www.ncbi.nlm.nih.gov/gene/?term=314993' target="_blank"> 314993 </a>	ATPase family, AAA domain containing 2	protein_coding	protein_coding	0.141058	1.10271	0.176253	0.379627	Not regulated	12.2	13.92	12.78	14.19	13.57	17.31	13.7
Atad2b	<a href='https://www.ncbi.nlm.nih.gov/gene/?term=500625' target="_blank"> 500625 </a>	ATPase family, AAA domain containing 2B	protein_coding	protein_coding	-0.00525708	-1.00365	0.954481	0.979629	Not regulated	9.4	10.51	9.76	10.37	9.68	9.7	10.37
Atad3a	<a href='https://www.ncbi.nlm.nih.gov/gene/?term=298682' target="_blank"> 298682 </a>	ATPase family, AAA domain containing 3A	protein_coding	protein_coding	0.220199	1.16489	0.00651463	0.0382648	Not regulated	48.54	50.86	46.68	52.81	61.42	56.77	55.58
Atad5	<a href='https://www.ncbi.nlm.nih.gov/gene/?term=303348' target="_blank"> 303348 </a>	ATPase family, AAA domain containing 5	protein_coding	protein_coding	0.315812	1.24471	0.0682372	0.206044	Not regulated	2.03	2.07	1.73	2.45	2.16	3.04	2.56
Atat1	<a href='https://www.ncbi.nlm.nih.gov/gene/?term=361789' target="_blank"> 361789 </a>	alpha tubulin acetyltransferase 1	protein_coding	protein_coding	0.0463875	1.03268	0.642394	0.808342	Not regulated	19.28	19.42	18.05	19.48	20.86	20.76	16.88
Ate1	<a href='https://www.ncbi.nlm.nih.gov/gene/?term=293526' target="_blank"> 293526 </a>	arginyltransferase 1	protein_coding	protein_coding	-0.0732528	-1.05209	0.264167	0.488241	Not regulated	24.56	27	25.03	26.42	24.19	24.4	24.67
Atf1	<a href='https://www.ncbi.nlm.nih.gov/gene/?term=315305' target="_blank"> 315305 </a>	activating transcription factor 1	protein_coding	protein_coding	0.00641472	1.00446	0.941686	0.973907	Not regulated	25.26	30.54	26.31	26.3	27.68	27.18	26.94
Atf2	<a href='https://www.ncbi.nlm.nih.gov/gene/?term=81647' target="_blank"> 81647 </a>	activating transcription factor 2	protein_coding	protein_coding	-0.0500732	-1.03532	0.512755	0.718284	Not regulated	14.65	15.45	15.6	15.02	14.42	15.14	14.6
Atf3	<a href='https://www.ncbi.nlm.nih.gov/gene/?term=25389' target="_blank"> 25389 </a>	activating transcription factor 3	protein_coding	protein_coding	-0.0738137	-1.0525	0.914158	0.961062	Not regulated	8.79	11.32	5.03	9.17	3.06	17.48	4.13
Atf4	<a href='https://www.ncbi.nlm.nih.gov/gene/?term=79255' target="_blank"> 79255 </a>	activating transcription factor 4	protein_coding	protein_coding	0.0351251	1.02465	0.745248	0.868931	Not regulated	328.91	320.2	306.14	376.73	375.99	307.75	340.26
Atf5	<a href='https://www.ncbi.nlm.nih.gov/gene/?term=282840' target="_blank"> 282840 </a>	activating transcription factor 5	protein_coding	protein_coding	0.00386415	1.00268	0.973158	0.988169	Not regulated	210.45	205.53	233.44	266.85	244.44	234.35	211.61
Atf6	<a href='https://www.ncbi.nlm.nih.gov/gene/?term=304962' target="_blank"> 304962 </a>	activating transcription factor 6	protein_coding	protein_coding	-0.299462	-1.23069	0.00763117	0.0431007	Not regulated	25.76	26.36	22.37	29.68	19.58	20.77	23.2
Atf6b	<a href='https://www.ncbi.nlm.nih.gov/gene/?term=406169' target="_blank"> 406169 </a>	activating transcription factor 6 beta	protein_coding	protein_coding	0.0419364	1.02949	0.525803	0.729259	Not regulated	69.4	70.29	70.77	73.32	69.81	79.22	71.25
Atf7	<a href='https://www.ncbi.nlm.nih.gov/gene/?term=315333' target="_blank"> 315333 </a>	activating transcription factor 7	protein_coding	protein_coding	-0.0928507	-1.06648	0.354067	0.57789	Not regulated	24.99	27.12	23.4	21.73	22.2	23.61	22.25
Atf7ip	<a href='https://www.ncbi.nlm.nih.gov/gene/?term=312800' target="_blank"> 312800 </a>	activating transcription factor 7 interacting protein	protein_coding	protein_coding	-0.272429	-1.20784	0.000223076	0.00273407	Not regulated	41.81	45.31	44.93	46.73	42.94	37.21	38.54
Atg10	<a href='https://www.ncbi.nlm.nih.gov/gene/?term=688555' target="_blank"> 688555 </a>	autophagy related 10	protein_coding	protein_coding	-0.531207	-1.44514	0.0102244	0.0539324	Not regulated	6.75	5.93	4.76	5.09	3.35	4.94	3.94
Atg101	<a href='https://www.ncbi.nlm.nih.gov/gene/?term=300240' target="_blank"> 300240 </a>	autophagy related 101			0.105652	1.07598	0.262351	0.485964	Not regulated	44.7	45.16	46.72	48.05	54.01	47.1	47.85
Atg12	<a href='https://www.ncbi.nlm.nih.gov/gene/?term=361321' target="_blank"> 361321 </a>	autophagy related 12	protein_coding	protein_coding	-0.017888	-1.01248	0.856705	0.934303	Not regulated	37.79	34.87	34.44	38.73	38.28	32.46	37.24
Atg13	<a href='https://www.ncbi.nlm.nih.gov/gene/?term=362164' target="_blank"> 362164 </a>	autophagy related 13	protein_coding	protein_coding	-0.109393	-1.07877	0.117985	0.294255	Not regulated	40.2	43.21	39.06	39.24	39.41	36.85	36.62
Atg14	<a href='https://www.ncbi.nlm.nih.gov/gene/?term=305831' target="_blank"> 305831 </a>	autophagy related 14	protein_coding	protein_coding	-0.391014	-1.31131	0.00695312	0.0400618	Not regulated	7.48	6.61	7.28	5.57	4.88	4.98	5.57
Atg16l1	<a href='https://www.ncbi.nlm.nih.gov/gene/?term=363278' target="_blank"> 363278 </a>	autophagy related 16-like 1	protein_coding	protein_coding	0.103432	1.07433	0.339377	0.565047	Not regulated	19.05	21.29	16.45	20.61	21.73	19.75	20.86
Atg16l2	<a href='https://www.ncbi.nlm.nih.gov/gene/?term=308865' target="_blank"> 308865 </a>	autophagy related 16-like 2	protein_coding	protein_coding	-0.11623	-1.0839	0.611063	0.788924	Not regulated	3.25	4.14	2.64	3.06	3.52	2.55	2.96
Atg2a	<a href='https://www.ncbi.nlm.nih.gov/gene/?term=689688' target="_blank"> 689688 </a>	autophagy related 2A	protein_coding	protein_coding	-0.137766	-1.1002	0.073779	0.216773	Not regulated	31	33.69	33.19	32.61	28.63	28.07	32.32
Atg2b	<a href='https://www.ncbi.nlm.nih.gov/gene/?term=314415' target="_blank"> 314415 </a>	autophagy related 2B	protein_coding	protein_coding	-0.222396	-1.16667	0.011869	0.0602651	Not regulated	20.38	20.76	17.38	20.81	16.86	18.11	16.13
Atg3	<a href='https://www.ncbi.nlm.nih.gov/gene/?term=171415' target="_blank"> 171415 </a>	autophagy related 3	protein_coding	protein_coding	-0.0446747	-1.03145	0.51534	0.720039	Not regulated	84.52	90.78	84.99	90.28	88.29	85.01	82.77
Atg4b	<a href='https://www.ncbi.nlm.nih.gov/gene/?term=316640' target="_blank"> 316640 </a>	autophagy related 4B, cysteine peptidase	protein_coding	protein_coding	-0.152319	-1.11135	0.117661	0.294052	Not regulated	41.21	46.29	40.66	50.99	39.87	40.91	40.36
Atg4c	<a href='https://www.ncbi.nlm.nih.gov/gene/?term=313391' target="_blank"> 313391 </a>	autophagy related 4C, cysteine peptidase	protein_coding	protein_coding	0.0458005	1.03226	0.73982	0.86609	Not regulated	12.79	13.37	10.89	11.79	13.85	11.16	11.77
Atg4d	<a href='https://www.ncbi.nlm.nih.gov/gene/?term=686505' target="_blank"> 686505 </a>	autophagy related 4D, cysteine peptidase	protein_coding	protein_coding	0.0425491	1.02993	0.69677	0.841659	Not regulated	49.01	49.27	47.61	59.21	55.97	51.75	49.27
Atg5	<a href='https://www.ncbi.nlm.nih.gov/gene/?term=365601' target="_blank"> 365601 </a>	autophagy related 5	protein_coding	protein_coding	0.189294	1.14021	0.051151	0.169791	Not regulated	24.57	22.21	24.43	26.26	28.3	26.88	28.19
Atg7	<a href='https://www.ncbi.nlm.nih.gov/gene/?term=312647' target="_blank"> 312647 </a>	autophagy related 7	protein_coding	protein_coding	-0.145872	-1.1064	0.108654	0.278398	Not regulated	20.2	20.07	18.16	21.33	17.25	19.05	17.94
Atg9a	<a href='https://www.ncbi.nlm.nih.gov/gene/?term=363254' target="_blank"> 363254 </a>	autophagy related 9A	protein_coding	protein_coding	0.0461394	1.0325	0.441019	0.659915	Not regulated	40.35	43.5	40.38	40.65	43.16	43.79	40.95
Atg9b	<a href='https://www.ncbi.nlm.nih.gov/gene/?term=499973' target="_blank"> 499973 </a>	autophagy related 9B	protein_coding	protein_coding	-0.762774	-1.69675	8.52253e-12	1.15646e-09	Down in F_UVB_WT_MG	78.74	106.25	92.59	80.7	49.95	51.92	56.62
Atic	<a href='https://www.ncbi.nlm.nih.gov/gene/?term=81643' target="_blank"> 81643 </a>	5-aminoimidazole-4-carboxamide ribonucleotide formyltransferase/IMP cyclohydrolase	protein_coding	protein_coding	0.307639	1.23768	0.000211445	0.0026132	Not regulated	29.77	31.7	28.98	30.59	33.56	40.22	39.1
Atl1	<a href='https://www.ncbi.nlm.nih.gov/gene/?term=362750' target="_blank"> 362750 </a>	atlastin GTPase 1	protein_coding	protein_coding	-0.990155	-1.9864	0.000204563	0.00254946	Down in F_UVB_WT_MG	3.77	4.11	4.3	2.72	1.55	2.67	1.52
Atl2	<a href='https://www.ncbi.nlm.nih.gov/gene/?term=298757' target="_blank"> 298757 </a>	atlastin GTPase 2	protein_coding	protein_coding	-0.290367	-1.22295	0.00547133	0.0337254	Not regulated	99.05	111.15	107.57	131.4	92.96	92.84	90.1
Atl3	<a href='https://www.ncbi.nlm.nih.gov/gene/?term=309187' target="_blank"> 309187 </a>	atlastin GTPase 3	protein_coding	protein_coding	-0.103946	-1.07471	0.17774	0.381777	Not regulated	326.41	307.59	300.68	342.18	291.08	288.4	313.41
Atm	<a href='https://www.ncbi.nlm.nih.gov/gene/?term=300711' target="_blank"> 300711 </a>	ATM serine/threonine kinase	protein_coding	protein_coding	-0.0968121	-1.06941	0.347209	0.572361	Not regulated	5.33	6.18	4.85	5.95	5.26	5.28	5.12
Atoh8	<a href='https://www.ncbi.nlm.nih.gov/gene/?term=500200' target="_blank"> 500200 </a>	atonal bHLH transcription factor 8	protein_coding	protein_coding	0.545892	1.45992	0.0334314	0.12675	Not regulated	1.52	1.66	1.33	1.22	1.66	2.31	2.34
Atox1	<a href='https://www.ncbi.nlm.nih.gov/gene/?term=84355' target="_blank"> 84355 </a>	antioxidant 1 copper chaperone	protein_coding	protein_coding	0.117062	1.08452	0.275457	0.498981	Not regulated	290.74	319.14	292.81	349.71	358.73	322.86	331.11
Atp10a	<a href='https://www.ncbi.nlm.nih.gov/gene/?term=365266' target="_blank"> 365266 </a>	ATPase phospholipid transporting 10A (putative)	protein_coding	protein_coding	-0.519317	-1.43328	0.0309009	0.119593	Not regulated	3.71	2.38	3.06	2.65	1.44	2.75	2.04
Atp10b	<a href='https://www.ncbi.nlm.nih.gov/gene/?term=303056' target="_blank"> 303056 </a>	ATPase phospholipid transporting 10B (putative)	protein_coding	protein_coding	-0.998827	-1.99837	0.000115754	0.00160679	Down in F_UVB_WT_MG	4.78	4.71	5.51	3.25	1.39	2.53	2.99
Atp10d	<a href='https://www.ncbi.nlm.nih.gov/gene/?term=360932' target="_blank"> 360932 </a>	ATPase phospholipid transporting 10D (putative)	protein_coding	protein_coding	0.394446	1.31444	0.000165	0.00213857	Not regulated	7.37	8.29	8.2	8.76	10.35	10.55	13.07
Atp11a	<a href='https://www.ncbi.nlm.nih.gov/gene/?term=306600' target="_blank"> 306600 </a>	ATPase phospholipid transporting 11A	protein_coding	protein_coding	-0.400828	-1.32027	3.80071e-05	0.000652995	Not regulated	53.92	62.36	52.15	66.55	41.78	46.13	45.14
Atp11b	<a href='https://www.ncbi.nlm.nih.gov/gene/?term=361929' target="_blank"> 361929 </a>	ATPase phospholipid transporting 11B (putative)	protein_coding	protein_coding	0.0613321	1.04343	0.449579	0.665981	Not regulated	31.22	34.87	34.4	30.92	31.21	35.32	36.02
Atp11c	<a href='https://www.ncbi.nlm.nih.gov/gene/?term=317599' target="_blank"> 317599 </a>	ATPase phospholipid transporting 11C	protein_coding	protein_coding	-0.139886	-1.10182	0.355561	0.579017	Not regulated	3.81	3.53	4.04	4.45	3.29	3.64	4.04
Atp12a	<a href='https://www.ncbi.nlm.nih.gov/gene/?term=171028' target="_blank"> 171028 </a>	ATPase H+/K+ transporting non-gastric alpha2 subunit	protein_coding	protein_coding	-0.794005	-1.73388	0.00742451	0.0423012	Down in F_UVB_WT_MG	5.99	7.36	7.7	9.56	2.34	4.19	6.76
Atp13a1	<a href='https://www.ncbi.nlm.nih.gov/gene/?term=290673' target="_blank"> 290673 </a>	ATPase 13A1	protein_coding	protein_coding	0.1038	1.0746	0.170458	0.371902	Not regulated	38.3	43.37	37.31	42.21	44.15	43.2	42.69
Atp13a2	<a href='https://www.ncbi.nlm.nih.gov/gene/?term=362645' target="_blank"> 362645 </a>	ATPase cation transporting 13A2	protein_coding	protein_coding	-0.200331	-1.14896	0.0286785	0.113493	Not regulated	38.34	36.69	37.38	31.8	29.52	33.99	31.64
Atp13a4	<a href='https://www.ncbi.nlm.nih.gov/gene/?term=288026' target="_blank"> 288026 </a>	ATPase 13A4	protein_coding	protein_coding	0.724988	1.65289	0.000155763	0.00203917	Up in F_UVB_WT_MG	2.73	2.45	3.29	2.32	3.55	4.68	5.19
Atp13a5	<a href='https://www.ncbi.nlm.nih.gov/gene/?term=303856' target="_blank"> 303856 </a>	ATPase 13A5	protein_coding	protein_coding	-0.955927	-1.93983	0.0365541	0.134536	Not regulated	0.8	1.01	0.64	0.44	0.22	0.66	0.29
Atp1a1	<a href='https://www.ncbi.nlm.nih.gov/gene/?term=24211' target="_blank"> 24211 </a>	ATPase Na+/K+ transporting subunit alpha 1	protein_coding	protein_coding	0.405816	1.32484	7.15829e-12	9.91572e-10	Not regulated	218.15	206.16	204.33	198.82	281.9	270.1	268.66
Atp1a2	<a href='https://www.ncbi.nlm.nih.gov/gene/?term=24212' target="_blank"> 24212 </a>	ATPase Na+/K+ transporting subunit alpha 2	protein_coding	protein_coding	0.495264	1.40958	0.0055728	0.034135	Not regulated	24.05	33	32.25	25.35	47.02	45.97	29.24
Atp1a3	<a href='https://www.ncbi.nlm.nih.gov/gene/?term=24213' target="_blank"> 24213 </a>	ATPase Na+/K+ transporting subunit alpha 3	protein_coding	protein_coding	-2.0236	-4.06596	0.00581518	0.0352302	Down in F_UVB_WT_MG	0.66	0.45	0.25	0.16	0.04	0.13	0.11
Atp1b1	<a href='https://www.ncbi.nlm.nih.gov/gene/?term=25650' target="_blank"> 25650 </a>	ATPase Na+/K+ transporting subunit beta 1	protein_coding	protein_coding	-0.967407	-1.95532	5.17395e-09	3.54655e-07	Down in F_UVB_WT_MG	125.81	152.81	151.47	167.82	56.04	96.32	77.31
Atp1b2	<a href='https://www.ncbi.nlm.nih.gov/gene/?term=24214' target="_blank"> 24214 </a>	ATPase Na+/K+ transporting subunit beta 2	protein_coding	protein_coding	-0.333945	-1.26046	0.11722	0.293223	Not regulated	5.36	6.27	6.89	5.22	4.8	6.1	3.31
Atp1b3	<a href='https://www.ncbi.nlm.nih.gov/gene/?term=25390' target="_blank"> 25390 </a>	ATPase Na+/K+ transporting subunit beta 3	protein_coding	protein_coding	0.166965	1.12269	0.0932352	0.252719	Not regulated	283.2	251.61	323.94	275.62	303.76	329.08	324.95
Atp23	<a href='https://www.ncbi.nlm.nih.gov/gene/?term=299828' target="_blank"> 299828 </a>	ATP23 metallopeptidase and ATP synthase assembly factor homolog			0.0832324	1.05939	0.431794	0.6507	Not regulated	38.47	41.6	38.84	42.78	46.98	40.3	41.12
Atp2a2	<a href='https://www.ncbi.nlm.nih.gov/gene/?term=29693' target="_blank"> 29693 </a>	ATPase sarcoplasmic/endoplasmic reticulum Ca2+ transporting 2	protein_coding	protein_coding	0.0783929	1.05584	0.299519	0.524356	Not regulated	165.79	178.26	167.04	192.48	185	186.67	191.13
Atp2a3	<a href='https://www.ncbi.nlm.nih.gov/gene/?term=25391' target="_blank"> 25391 </a>	ATPase sarcoplasmic/endoplasmic reticulum Ca2+ transporting 3	protein_coding	protein_coding	-0.0555922	-1.03929	0.711121	0.849792	Not regulated	6.72	6.55	6.41	5.52	4.8	7.1	6.42
Atp2b1	<a href='https://www.ncbi.nlm.nih.gov/gene/?term=29598' target="_blank"> 29598 </a>	ATPase plasma membrane Ca2+ transporting 1	protein_coding	protein_coding	-0.0727056	-1.05169	0.341693	0.56734	Not regulated	23.03	23.96	22.47	21.44	19.68	22.72	22.59
Atp2b3	<a href='https://www.ncbi.nlm.nih.gov/gene/?term=29599' target="_blank"> 29599 </a>	ATPase plasma membrane Ca2+ transporting 3	protein_coding	protein_coding	-0.389474	-1.30992	0.320735	0.546532	Not regulated	0.23	0.32	0.38	0.26	0.17	0.33	0.26
Atp2b4	<a href='https://www.ncbi.nlm.nih.gov/gene/?term=29600' target="_blank"> 29600 </a>	ATPase plasma membrane Ca2+ transporting 4	protein_coding	protein_coding	-0.681432	-1.60373	3.97705e-18	1.35607e-15	Down in F_UVB_WT_MG	59.33	68.78	59.11	59.04	36.98	42.58	36.78
Atp2c1	<a href='https://www.ncbi.nlm.nih.gov/gene/?term=170699' target="_blank"> 170699 </a>	ATPase secretory pathway Ca2+ transporting 1	protein_coding	protein_coding	-0.199874	-1.1486	0.304294	0.528609	Not regulated	21.83	23.92	22.92	20.64	21.08	12.24	25.38
Atp2c2	<a href='https://www.ncbi.nlm.nih.gov/gene/?term=171496' target="_blank"> 171496 </a>	ATPase secretory pathway Ca2+ transporting 2	protein_coding	protein_coding	0.180262	1.13309	0.121683	0.299767	Not regulated	8.4	8.58	8.35	7.6	8.14	9.86	10.08
Atp5f1a	<a href='https://www.ncbi.nlm.nih.gov/gene/?term=65262' target="_blank"> 65262 </a>	ATP synthase F1 subunit alpha			0.15275	1.11169	0.0202519	0.0887932	Not regulated	612.21	683.84	654.58	671.1	760.13	728.44	699.74
Atp5f1b	<a href='https://www.ncbi.nlm.nih.gov/gene/?term=171374' target="_blank"> 171374 </a>	ATP synthase F1 subunit beta			0.17704	1.13056	0.00436132	0.0283465	Not regulated	1494.61	1574.1	1482.95	1494.37	1806.18	1703.34	1621.41
Atp5f1c	<a href='https://www.ncbi.nlm.nih.gov/gene/?term=116550' target="_blank"> 116550 </a>	ATP synthase F1 subunit gamma			0.135744	1.09866	0.0462924	0.158496	Not regulated	312.04	341.68	305.98	337.06	371.58	357.12	345.31
Atp5f1d	<a href='https://www.ncbi.nlm.nih.gov/gene/?term=245965' target="_blank"> 245965 </a>	ATP synthase F1 subunit delta			0.232077	1.17452	0.00469597	0.030124	Not regulated	312.54	316.14	326.13	344.45	386.64	413.06	348.95
Atp5if1	<a href='https://www.ncbi.nlm.nih.gov/gene/?term=25392' target="_blank"> 25392 </a>	ATP synthase inhibitory factor subunit 1			-0.101085	-1.07258	0.162179	0.360525	Not regulated	751.05	751.1	807.74	736.67	703.71	749.9	679.24
Atp5mc1	<a href='https://www.ncbi.nlm.nih.gov/gene/?term=29754' target="_blank"> 29754 </a>	ATP synthase membrane subunit c locus 1			-0.106125	-1.07633	0.677715	0.828332	Not regulated	9.92	17.53	14.71	13.98	16.11	12.83	10.12
Atp5mc2	<a href='https://www.ncbi.nlm.nih.gov/gene/?term=171082' target="_blank"> 171082 </a>	ATP synthase membrane subunit c locus 2			0.0908351	1.06499	0.0791608	0.226754	Not regulated	757.12	767.74	746.28	744.87	815.47	805.21	790.62
Atp5mc3	<a href='https://www.ncbi.nlm.nih.gov/gene/?term=114630' target="_blank"> 114630 </a>	ATP synthase membrane subunit c locus 3			0.345623	1.2707	0.00119378	0.0102419	Not regulated	531.59	470.11	605.14	540.54	739.77	646.95	657.78
Atp5mf	<a href='https://www.ncbi.nlm.nih.gov/gene/?term=690441' target="_blank"> 690441 </a>	ATP synthase membrane subunit f			-0.0496095	-1.03498	0.543992	0.741973	Not regulated	721.87	739.81	743.41	683.86	735.21	711.24	648.09
Atp5mg	<a href='https://www.ncbi.nlm.nih.gov/gene/?term=300677' target="_blank"> 300677 </a>	ATP synthase membrane subunit g			0.203083	1.15116	0.0179959	0.0816198	Not regulated	130.59	144.13	145.77	150.41	175.86	163.94	154.12
Atp5pd	<a href='https://www.ncbi.nlm.nih.gov/gene/?term=641434' target="_blank"> 641434 </a>	ATP synthase peripheral stalk subunit d			0.110004	1.07923	0.118117	0.294363	Not regulated	264.1	274.03	254.63	282.94	304.05	284.24	282.96
Atp5pf	<a href='https://www.ncbi.nlm.nih.gov/gene/?term=94271' target="_blank"> 94271 </a>	ATP synthase peripheral stalk subunit F6			0.0237839	1.01662	0.719389	0.855368	Not regulated	173.3	176.62	174.02	172.36	181.1	182.93	167.53
Atp5po	<a href='https://www.ncbi.nlm.nih.gov/gene/?term=192241' target="_blank"> 192241 </a>	ATP synthase peripheral stalk subunit OSCP			0.160935	1.11801	0.0326392	0.124687	Not regulated	446.5	443.55	425.47	447.84	519.24	506.18	451.73
Atp6ap1	<a href='https://www.ncbi.nlm.nih.gov/gene/?term=83615' target="_blank"> 83615 </a>	ATPase H+ transporting accessory protein 1	protein_coding	protein_coding	-0.0624747	-1.04426	0.282045	0.506021	Not regulated	153.7	145.31	143.29	142.84	140.2	144.33	136.46
Atp6ap2	<a href='https://www.ncbi.nlm.nih.gov/gene/?term=302526' target="_blank"> 302526 </a>	ATPase H+ transporting accessory protein 2	protein_coding	protein_coding	-0.0596346	-1.0422	0.592316	0.775945	Not regulated	69.09	75.15	81.52	91.42	77.88	79.34	71.51
Atp6v0a1	<a href='https://www.ncbi.nlm.nih.gov/gene/?term=29757' target="_blank"> 29757 </a>	ATPase H+ transporting V0 subunit a1	protein_coding	protein_coding	-0.236143	-1.17784	0.00518208	0.0324441	Not regulated	90.25	106.84	104.16	106.5	90.73	87.37	81.88
Atp6v0a2	<a href='https://www.ncbi.nlm.nih.gov/gene/?term=116455' target="_blank"> 116455 </a>	ATPase H+ transporting V0 subunit a2			0.0117136	1.00815	0.862343	0.936675	Not regulated	53.91	58.02	55.64	57.13	59.12	56.57	54.03
Atp6v0a4	<a href='https://www.ncbi.nlm.nih.gov/gene/?term=296981' target="_blank"> 296981 </a>	ATPase H+ transporting V0 subunit a4	protein_coding	protein_coding	-0.437021	-1.35381	0.109427	0.279677	Not regulated	17.3	16.31	22.22	14.45	7.69	11.3	20.08
Atp6v0b	<a href='https://www.ncbi.nlm.nih.gov/gene/?term=298451' target="_blank"> 298451 </a>	ATPase H+ transporting V0 subunit B	protein_coding	protein_coding	-0.0727931	-1.05175	0.470264	0.68198	Not regulated	139.88	159.7	160.33	182.39	154.65	154.78	149.33
Atp6v0c	<a href='https://www.ncbi.nlm.nih.gov/gene/?term=170667' target="_blank"> 170667 </a>	ATPase H+ transporting V0 subunit C	protein_coding	protein_coding	0.148338	1.10829	0.0295489	0.115916	Not regulated	435.77	466.74	484.75	478.3	518.74	502.24	531.79
Atp6v0d1	<a href='https://www.ncbi.nlm.nih.gov/gene/?term=291969' target="_blank"> 291969 </a>	ATPase H+ transporting V0 subunit D1	protein_coding	protein_coding	-0.176965	-1.1305	0.00186872	0.0146437	Not regulated	215.58	232.63	222.76	210.69	196.55	193.58	195.35
Atp6v0e1	<a href='https://www.ncbi.nlm.nih.gov/gene/?term=94170' target="_blank"> 94170 </a>	ATPase H+ transporting V0 subunit e1	protein_coding	protein_coding	-0.0658037	-1.04667	0.440433	0.659558	Not regulated	387.82	407.27	389.87	450.75	409.56	394.35	375.41
Atp6v0e2	<a href='https://www.ncbi.nlm.nih.gov/gene/?term=436582' target="_blank"> 436582 </a>	ATPase, H+ transporting V0 subunit e2	protein_coding	protein_coding	-0.0519859	-1.03669	0.610263	0.788255	Not regulated	18.04	17.16	17.3	15.19	17.1	16.87	15.08
Atp6v1a	<a href='https://www.ncbi.nlm.nih.gov/gene/?term=685232' target="_blank"> 685232 </a>	ATPase H+ transporting V1 subunit A	protein_coding	protein_coding	0.0841035	1.06003	0.202737	0.414579	Not regulated	64.38	69	70.28	72.72	71.17	75.16	73.9
Atp6v1b2	<a href='https://www.ncbi.nlm.nih.gov/gene/?term=117596' target="_blank"> 117596 </a>	ATPase H+ transporting V1 subunit B2	protein_coding	protein_coding	-0.239731	-1.18077	0.0368332	0.135269	Not regulated	239.1	254.54	240.62	315.54	233.72	209.7	224.26
Atp6v1c1	<a href='https://www.ncbi.nlm.nih.gov/gene/?term=299971' target="_blank"> 299971 </a>	ATPase H+ transporting V1 subunit C1	protein_coding	protein_coding	-0.313567	-1.24278	1.77569e-07	7.31056e-06	Not regulated	75.78	77.27	78.1	74.11	60.94	61.72	61.49
Atp6v1c2	<a href='https://www.ncbi.nlm.nih.gov/gene/?term=362802' target="_blank"> 362802 </a>	ATPase H+ transporting V1 subunit C2	protein_coding	protein_coding	-0.602395	-1.51823	0.00174554	0.0139245	Down in F_UVB_WT_MG	47.76	46.88	49.13	35.42	22.03	27.46	39.15
Atp6v1d	<a href='https://www.ncbi.nlm.nih.gov/gene/?term=299159' target="_blank"> 299159 </a>	ATPase H+ transporting V1 subunit D	protein_coding	protein_coding	0.00372376	1.00258	0.952546	0.978953	Not regulated	214.55	217.39	202.49	209.39	212.72	225.34	199.65
Atp6v1e1	<a href='https://www.ncbi.nlm.nih.gov/gene/?term=297566' target="_blank"> 297566 </a>	ATPase H+ transporting V1 subunit E1	protein_coding	protein_coding	-0.15023	-1.10975	0.00657259	0.0384693	Not regulated	243.51	247.22	240.89	229.6	215.31	208.72	215.75
Atp6v1h	<a href='https://www.ncbi.nlm.nih.gov/gene/?term=297797' target="_blank"> 297797 </a>	ATPase H+ transporting V1 subunit H	protein_coding	protein_coding	-0.0960503	-1.06884	0.200068	0.411143	Not regulated	85.37	93.6	94.45	101.42	92.63	86.04	88.04
Atp7a	<a href='https://www.ncbi.nlm.nih.gov/gene/?term=24941' target="_blank"> 24941 </a>	ATPase copper transporting alpha	protein_coding	protein_coding	-0.179379	-1.1324	0.0863899	0.240037	Not regulated	13.55	13.46	13.28	12.42	10.51	11.91	13.53
Atp7b	<a href='https://www.ncbi.nlm.nih.gov/gene/?term=24218' target="_blank"> 24218 </a>	ATPase copper transporting beta	protein_coding	protein_coding	0.49582	1.41012	0.348819	0.573728	Not regulated	0.36	0.15	0.13	0.14	0.37	0.2	0.22
Atp8a1	<a href='https://www.ncbi.nlm.nih.gov/gene/?term=289615' target="_blank"> 289615 </a>	ATPase phospholipid transporting 8A1	protein_coding	protein_coding	0.0490112	1.03456	0.543884	0.741955	Not regulated	66.96	66.1	56.31	69.09	76.68	67.87	67.23
Atp8a2	<a href='https://www.ncbi.nlm.nih.gov/gene/?term=691889' target="_blank"> 691889 </a>	ATPase phospholipid transporting 8A2			-0.993745	-1.99135	0.000681184	0.00658313	Down in F_UVB_WT_MG	1.55	0.87	1.07	1.31	0.46	0.4	0.9
Atp8b1	<a href='https://www.ncbi.nlm.nih.gov/gene/?term=291555' target="_blank"> 291555 </a>	ATPase phospholipid transporting 8B1	protein_coding	protein_coding	-0.0905921	-1.06481	0.334964	0.561285	Not regulated	11.63	13.54	12.33	11.89	10.8	12.92	11.21
Atp8b2	<a href='https://www.ncbi.nlm.nih.gov/gene/?term=685152' target="_blank"> 685152 </a>	ATPase phospholipid transporting 8B2	protein_coding	protein_coding	-0.160919	-1.118	0.322185	0.548288	Not regulated	8.33	8.7	9.19	6.26	5.93	8.51	7.46
Atp8b3	<a href='https://www.ncbi.nlm.nih.gov/gene/?term=299616' target="_blank"> 299616 </a>	ATPase phospholipid transporting 8B3	protein_coding	protein_coding	-0.185895	-1.13752	0.557228	0.751577	Not regulated	0.58	0.89	0.56	0.7	0.72	0.64	0.46
Atp8b4	<a href='https://www.ncbi.nlm.nih.gov/gene/?term=311396' target="_blank"> 311396 </a>	ATPase phospholipid transporting 8B4 (putative)	protein_coding	protein_coding	1.18329	2.27094	0.0162675	0.0756647	Not regulated	0.41	0.23	0.16	0.2	0.29	0.74	0.47
Atp8b5p	<a href='https://www.ncbi.nlm.nih.gov/gene/?term=691125' target="_blank"> 691125 </a>	ATPase, class I, type 8B, member 5, pseudogene			-0.519694	-1.43365	0.408071	0.627998	Not regulated	0.4	0.47	0.15	0.1	0.19	0.26	0.14
Atp9a	<a href='https://www.ncbi.nlm.nih.gov/gene/?term=84011' target="_blank"> 84011 </a>	ATPase phospholipid transporting 9A (putative)	protein_coding	protein_coding	-0.200277	-1.14892	0.00160483	0.0130367	Not regulated	80.82	81.63	86.73	78.63	70.28	74.58	70.15
Atp9b	<a href='https://www.ncbi.nlm.nih.gov/gene/?term=291411' target="_blank"> 291411 </a>	ATPase phospholipid transporting 9B (putative)	protein_coding	protein_coding	0.0315768	1.02213	0.725707	0.858949	Not regulated	33.54	31.51	29.82	35.95	34.26	34.69	31.54
Atpaf1	<a href='https://www.ncbi.nlm.nih.gov/gene/?term=313510' target="_blank"> 313510 </a>	ATP synthase mitochondrial F1 complex assembly factor 1	protein_coding	protein_coding	0.0769882	1.05481	0.462119	0.675897	Not regulated	14.3	14.21	12.68	13.94	15.66	14.97	13.02
Atpaf2	<a href='https://www.ncbi.nlm.nih.gov/gene/?term=303190' target="_blank"> 303190 </a>	ATP synthase mitochondrial F1 complex assembly factor 2	protein_coding	protein_coding	0.35984	1.28328	1.33377e-05	0.000267517	Not regulated	51.63	46.89	46.57	46.36	65.22	59.71	60.04
Atpsckmt	<a href='https://www.ncbi.nlm.nih.gov/gene/?term=499561' target="_blank"> 499561 </a>	ATP synthase c subunit lysine N-methyltransferase			0.0132448	1.00922	0.901381	0.954648	Not regulated	15.58	15.65	14.27	15.33	15.35	14.74	15.95
Atr	<a href='https://www.ncbi.nlm.nih.gov/gene/?term=685055' target="_blank"> 685055 </a>	ATR serine/threonine kinase	protein_coding	protein_coding	0.0668683	1.04744	0.46076	0.674577	Not regulated	4.71	4.94	5.01	5.21	4.88	5.36	5.4
Atrip	<a href='https://www.ncbi.nlm.nih.gov/gene/?term=301014' target="_blank"> 301014 </a>	ATR interacting protein	protein_coding	protein_coding	-0.0212297	-1.01482	0.892465	0.950213	Not regulated	6.15	5.9	7.41	6.35	6.28	7.73	5.54
Atrn	<a href='https://www.ncbi.nlm.nih.gov/gene/?term=83526' target="_blank"> 83526 </a>	attractin	protein_coding	protein_coding	-0.0841895	-1.06009	0.167638	0.368167	Not regulated	53.76	56.62	51.94	56.2	53.28	52.2	49.32
Atrnl1	<a href='https://www.ncbi.nlm.nih.gov/gene/?term=307992' target="_blank"> 307992 </a>	attractin like 1	protein_coding	protein_coding	-0.341725	-1.26727	9.54258e-05	0.00138534	Not regulated	10.42	10.83	10.85	12.23	8.82	9.07	8.42
Atrx	<a href='https://www.ncbi.nlm.nih.gov/gene/?term=246284' target="_blank"> 246284 </a>	ATRX, chromatin remodeler	processed_transcript	processed_transcript	-0.148143	-1.10814	0.041325	0.146466	Not regulated	11.89	13.53	12.43	12.47	10.4	11.71	12.18
Atxn1	<a href='https://www.ncbi.nlm.nih.gov/gene/?term=25049' target="_blank"> 25049 </a>	ataxin 1	protein_coding	protein_coding	0.0253359	1.01772	0.872433	0.942203	Not regulated	2.32	2.64	2.91	2.42	2.59	2.96	2.36
Atxn10	<a href='https://www.ncbi.nlm.nih.gov/gene/?term=170821' target="_blank"> 170821 </a>	ataxin 10	protein_coding	protein_coding	-0.0992808	-1.07124	0.228158	0.445825	Not regulated	103.37	109.62	100.05	113.91	106.72	98.95	94.09
Atxn2	<a href='https://www.ncbi.nlm.nih.gov/gene/?term=288663' target="_blank"> 288663 </a>	ataxin 2	protein_coding	protein_coding	-0.0770262	-1.05484	0.353143	0.577129	Not regulated	15.31	17.14	15.45	17.19	16.07	15.74	14.37
Atxn2l	<a href='https://www.ncbi.nlm.nih.gov/gene/?term=361649' target="_blank"> 361649 </a>	ataxin 2-like	protein_coding	protein_coding	0.127033	1.09205	0.0838341	0.23545	Not regulated	50.81	53.4	47.62	49.14	57.74	51.44	55.84
Atxn3	<a href='https://www.ncbi.nlm.nih.gov/gene/?term=60331' target="_blank"> 60331 </a>	ataxin 3	protein_coding	protein_coding	-0.0479643	-1.03381	0.648128	0.811896	Not regulated	23.47	22.06	22.76	24.32	22.57	19.81	24.8
Atxn7	<a href='https://www.ncbi.nlm.nih.gov/gene/?term=361015' target="_blank"> 361015 </a>	ataxin 7	protein_coding	protein_coding	-0.0914489	-1.06544	0.388394	0.609806	Not regulated	10.83	10.79	9.3	10.87	10.1	8.5	10.12
Atxn7l1	<a href='https://www.ncbi.nlm.nih.gov/gene/?term=362726' target="_blank"> 362726 </a>	ataxin 7-like 1			-0.336799	-1.26295	0.00728257	0.0416532	Not regulated	14.52	13.67	13.77	12.36	11.92	15.27	10.52
Atxn7l2	<a href='https://www.ncbi.nlm.nih.gov/gene/?term=310781' target="_blank"> 310781 </a>	ataxin 7-like 2	protein_coding	protein_coding	0.0226261	1.01581	0.900008	0.95403	Not regulated	4.13	3.95	4.3	3.81	4.16	3.36	5.01
Atxn7l3	<a href='https://www.ncbi.nlm.nih.gov/gene/?term=287734' target="_blank"> 287734 </a>	ataxin 7-like 3	protein_coding	protein_coding	0.122085	1.08831	0.141851	0.330705	Not regulated	29.13	29.91	28.35	30.65	33.74	29.62	33.06
Atxn7l3b	<a href='https://www.ncbi.nlm.nih.gov/gene/?term=100192313' target="_blank"> 100192313 </a>	ataxin 7-like 3B	protein_coding	protein_coding	0.0593547	1.042	0.531874	0.733166	Not regulated	29.63	32.38	32.38	37.6	35.42	34.27	33.62
Auh	<a href='https://www.ncbi.nlm.nih.gov/gene/?term=361215' target="_blank"> 361215 </a>	AU RNA binding methylglutaconyl-CoA hydratase	protein_coding	protein_coding	0.0954421	1.06839	0.408897	0.628396	Not regulated	140.17	142.09	139.63	163.17	180.93	143.2	146.84
Aunip	<a href='https://www.ncbi.nlm.nih.gov/gene/?term=689656' target="_blank"> 689656 </a>	aurora kinase A and ninein interacting protein	protein_coding	protein_coding	0.364942	1.28783	0.250422	0.473364	Not regulated	0.95	0.85	1.25	0.98	0.94	1.22	1.73
Aup1	<a href='https://www.ncbi.nlm.nih.gov/gene/?term=680423' target="_blank"> 680423 </a>	AUP1, lipid droplet regulating VLDL assembly factor	protein_coding	protein_coding	0.0395526	1.0278	0.645923	0.810405	Not regulated	171.77	179.04	175.22	186.77	201.66	172.88	175.34
Aurka	<a href='https://www.ncbi.nlm.nih.gov/gene/?term=261730' target="_blank"> 261730 </a>	aurora kinase A	protein_coding	protein_coding	0.639948	1.55827	2.50961e-09	1.83367e-07	Up in F_UVB_WT_MG	12.41	12.52	13.46	13.66	19.87	19.35	21.21
Aurkaip1	<a href='https://www.ncbi.nlm.nih.gov/gene/?term=298687' target="_blank"> 298687 </a>	aurora kinase A interacting protein 1	protein_coding	protein_coding	-0.0130366	-1.00908	0.847357	0.92872	Not regulated	133.24	148.43	133.64	129.29	134.31	136.57	137.26
Aurkb	<a href='https://www.ncbi.nlm.nih.gov/gene/?term=114592' target="_blank"> 114592 </a>	aurora kinase B	protein_coding	protein_coding	0.672274	1.59358	1.69394e-05	0.00032505	Up in F_UVB_WT_MG	12.06	13.42	14.39	11.24	17.78	25.22	18.44
Aurkc	<a href='https://www.ncbi.nlm.nih.gov/gene/?term=292554' target="_blank"> 292554 </a>	aurora kinase C	protein_coding	protein_coding	-0.240794	-1.18164	0.110995	0.282181	Not regulated	5.04	4.95	4.21	6	4.22	4.27	4.21
Aven	<a href='https://www.ncbi.nlm.nih.gov/gene/?term=311299' target="_blank"> 311299 </a>	apoptosis and caspase activation inhibitor	protein_coding	protein_coding	0.155674	1.11394	0.135325	0.320889	Not regulated	21.59	24.65	21.52	20.17	24.03	24.06	21.97
Avil	<a href='https://www.ncbi.nlm.nih.gov/gene/?term=79253' target="_blank"> 79253 </a>	advillin	protein_coding	protein_coding	-0.448989	-1.36508	0.0665908	0.202401	Not regulated	1.43	1.51	1.37	1.34	1.05	0.9	1.14
Avl9	<a href='https://www.ncbi.nlm.nih.gov/gene/?term=312371' target="_blank"> 312371 </a>	AVL9 cell migration associated	protein_coding	protein_coding	-0.0553315	-1.0391	0.486905	0.696337	Not regulated	6.85	7.17	6.52	6.34	6.27	6.63	6.52
Avpi1	<a href='https://www.ncbi.nlm.nih.gov/gene/?term=171386' target="_blank"> 171386 </a>	arginine vasopressin-induced 1	protein_coding	protein_coding	0.131002	1.09505	0.0730554	0.215599	Not regulated	117.29	111.53	110.66	102.82	123.27	121.86	118.45
Avpr1a	<a href='https://www.ncbi.nlm.nih.gov/gene/?term=25107' target="_blank"> 25107 </a>	arginine vasopressin receptor 1A	protein_coding	protein_coding	-0.309968	-1.23968	0.3374	0.563173	Not regulated	1.2	1.37	0.88	1.06	0.61	0.53	1.27
Awat1	<a href='https://www.ncbi.nlm.nih.gov/gene/?term=679520' target="_blank"> 679520 </a>	acyl-CoA wax alcohol acyltransferase 1	protein_coding	protein_coding	-0.32626	-1.25376	0.000406945	0.00444663	Not regulated	917.64	953.08	999.71	1109.53	805.23	743.91	835.14
Awat2	<a href='https://www.ncbi.nlm.nih.gov/gene/?term=302425' target="_blank"> 302425 </a>	acyl-CoA wax alcohol acyltransferase 2	protein_coding	protein_coding	-0.653964	-1.57349	2.87614e-20	1.31886e-17	Down in F_UVB_WT_MG	10767.2	11608.6	12062.1	12000.9	7433.77	7744.24	6961.1
Axin2	<a href='https://www.ncbi.nlm.nih.gov/gene/?term=29134' target="_blank"> 29134 </a>	axin 2	protein_coding	protein_coding	0.38086	1.30212	0.000460728	0.00490141	Not regulated	8.89	8.27	8.55	7.43	10.18	10.76	11.47
Axl	<a href='https://www.ncbi.nlm.nih.gov/gene/?term=308444' target="_blank"> 308444 </a>	Axl receptor tyrosine kinase	protein_coding	protein_coding	0.00363146	1.00252	0.969459	0.98659	Not regulated	27.15	25.53	23.21	21.91	22.73	25.96	25.02
AY172581.24	<a href='https://www.ncbi.nlm.nih.gov/gene/?term=NA' target="_blank"> NA </a>		Mt_rRNA	Mt_rRNA	0.286723	1.21987	0.0179437	0.0814109	Not regulated	332.45	256.8	280.69	267.58	344.98	306.56	390.35
AY172581.9	<a href='https://www.ncbi.nlm.nih.gov/gene/?term=NA' target="_blank"> NA </a>		Mt_rRNA	Mt_rRNA	-0.0122059	-1.0085	0.902972	0.955546	Not regulated	503.57	432.84	434.2	386.73	421.34	416.16	470.68
Azi2	<a href='https://www.ncbi.nlm.nih.gov/gene/?term=316051' target="_blank"> 316051 </a>	5-azacytidine induced 2	protein_coding	protein_coding	0.0742533	1.05282	0.349243	0.573901	Not regulated	22.05	23.94	22.22	24.8	24.04	24.26	25.24
Azin1	<a href='https://www.ncbi.nlm.nih.gov/gene/?term=58961' target="_blank"> 58961 </a>	antizyme inhibitor 1	protein_coding	protein_coding	-0.00745424	-1.00518	0.951239	0.978864	Not regulated	58.55	66.17	67.94	84.41	67.84	69.1	70.12
Azin2	<a href='https://www.ncbi.nlm.nih.gov/gene/?term=366473' target="_blank"> 366473 </a>	antizyme inhibitor 2	protein_coding	protein_coding	0.349983	1.27455	0.315774	0.540712	Not regulated	0.64	0.9	0.75	1.12	0.96	1.15	1.2
B2m	<a href='https://www.ncbi.nlm.nih.gov/gene/?term=24223' target="_blank"> 24223 </a>	beta-2 microglobulin	protein_coding	protein_coding	-0.473236	-1.38822	3.3837e-07	1.2499e-05	Not regulated	527.69	558.83	511.76	428.19	367.55	376.58	351.67
B3galnt1	<a href='https://www.ncbi.nlm.nih.gov/gene/?term=310508' target="_blank"> 310508 </a>	beta-1,3-N-acetylgalactosaminyltransferase 1 (globoside blood group)	protein_coding	protein_coding	0.143771	1.10479	0.351743	0.576368	Not regulated	12.86	11.98	12.38	9.37	11.19	12.26	15.19
B3galnt2	<a href='https://www.ncbi.nlm.nih.gov/gene/?term=291212' target="_blank"> 291212 </a>	beta-1,3-N-acetylgalactosaminyltransferase 2	protein_coding	protein_coding	0.0809724	1.05773	0.355286	0.578933	Not regulated	10.02	10.5	10.32	9.41	10.75	10.49	10.85
B3galt2	<a href='https://www.ncbi.nlm.nih.gov/gene/?term=686081' target="_blank"> 686081 </a>	Beta-1,3-galactosyltransferase 2	protein_coding	protein_coding	-0.340582	-1.26627	0.127336	0.309619	Not regulated	6.9	4.11	6.49	4.64	4.02	5.49	3.67
B3galt4	<a href='https://www.ncbi.nlm.nih.gov/gene/?term=171079' target="_blank"> 171079 </a>	Beta-1,3-galactosyltransferase 4	protein_coding	protein_coding	-0.126075	-1.09132	0.119712	0.296671	Not regulated	525.4	480.68	484.16	435.35	457.62	425.07	442
B3galt5	<a href='https://www.ncbi.nlm.nih.gov/gene/?term=288161' target="_blank"> 288161 </a>	Beta-1,3-galactosyltransferase 5	protein_coding	protein_coding	-0.694623	-1.61846	0.00113877	0.00987824	Down in F_UVB_WT_MG	1.61	1.83	1.82	1.62	1.32	0.83	0.98
B3galt6	<a href='https://www.ncbi.nlm.nih.gov/gene/?term=298690' target="_blank"> 298690 </a>	Beta-1,3-galactosyltransferase 6	protein_coding	protein_coding	0.267255	1.20352	0.0692773	0.208145	Not regulated	5.76	5.81	5.15	6.08	7.21	6.19	7.14
B3glct	<a href='https://www.ncbi.nlm.nih.gov/gene/?term=689765' target="_blank"> 689765 </a>	beta 3-glucosyltransferase			-0.0812531	-1.05794	0.422281	0.64155	Not regulated	8.77	8.76	8.08	9.18	8.05	8.63	8.23
B3gnt2	<a href='https://www.ncbi.nlm.nih.gov/gene/?term=305571' target="_blank"> 305571 </a>	UDP-GlcNAc:betaGal beta-1,3-N-acetylglucosaminyltransferase 2	protein_coding	protein_coding	-0.0300555	-1.02105	0.780126	0.888331	Not regulated	15.28	19.49	17.01	19.01	16.14	17.1	19.51
B3gnt5	<a href='https://www.ncbi.nlm.nih.gov/gene/?term=116740' target="_blank"> 116740 </a>	UDP-GlcNAc:betaGal beta-1,3-N-acetylglucosaminyltransferase 5	protein_coding	protein_coding	0.00858773	1.00597	0.982576	0.991857	Not regulated	0.76	0.32	0.52	0.61	0.34	0.49	0.72
B3gnt6	<a href='https://www.ncbi.nlm.nih.gov/gene/?term=292325' target="_blank"> 292325 </a>	UDP-GlcNAc:betaGal beta-1,3-N-acetylglucosaminyltransferase 6	protein_coding	protein_coding	-0.407785	-1.32665	0.134087	0.318944	Not regulated	6.67	4.49	4.85	3.18	3.23	4.71	2.97
B3gnt7	<a href='https://www.ncbi.nlm.nih.gov/gene/?term=316583' target="_blank"> 316583 </a>	UDP-GlcNAc:betaGal beta-1,3-N-acetylglucosaminyltransferase 7	protein_coding	protein_coding	0.354861	1.27886	0.34159	0.56734	Not regulated	2.48	0.96	1.3	1.04	1.45	2.09	2.01
B3gnt9	<a href='https://www.ncbi.nlm.nih.gov/gene/?term=291958' target="_blank"> 291958 </a>	UDP-GlcNAc:betaGal beta-1,3-N-acetylglucosaminyltransferase 9	protein_coding	protein_coding	0.194417	1.14426	0.325053	0.550925	Not regulated	2.4	2.7	3.46	2.24	2.66	3.5	3.18
B3gntl1	<a href='https://www.ncbi.nlm.nih.gov/gene/?term=367384' target="_blank"> 367384 </a>	UDP-GlcNAc:betaGal beta-1,3-N-acetylglucosaminyltransferase-like 1	protein_coding	protein_coding	-0.306814	-1.23697	0.0993214	0.26288	Not regulated	3.19	3.65	3.23	2.93	2.89	2.45	2.15
B4galnt1	<a href='https://www.ncbi.nlm.nih.gov/gene/?term=64828' target="_blank"> 64828 </a>	beta-1,4-N-acetyl-galactosaminyl transferase 1	protein_coding	protein_coding	0.93375	1.91023	0.0180353	0.0817428	Not regulated	0.98	1.51	1.5	1.31	1.2	2.13	3.99
B4galnt3	<a href='https://www.ncbi.nlm.nih.gov/gene/?term=500306' target="_blank"> 500306 </a>	beta-1,4-N-acetyl-galactosaminyl transferase 3	protein_coding	protein_coding	1.30755	2.47521	2.90617e-08	1.617e-06	Up in F_UVB_WT_MG	1.32	1.3	1.68	1.36	2.66	2.94	4.92
B4galnt4	<a href='https://www.ncbi.nlm.nih.gov/gene/?term=309105' target="_blank"> 309105 </a>	beta-1,4-N-acetyl-galactosaminyl transferase 4	protein_coding	protein_coding	0.696546	1.62062	0.00918987	0.0495567	Up in F_UVB_WT_MG	1.06	0.74	0.91	0.64	1.28	1.33	1.46
B4galt1	<a href='https://www.ncbi.nlm.nih.gov/gene/?term=24390' target="_blank"> 24390 </a>	beta-1,4-galactosyltransferase 1	protein_coding	protein_coding	-0.0999352	-1.07173	0.324836	0.550718	Not regulated	32.32	32.29	33.08	32.3	26.59	35.19	29.58
B4galt2	<a href='https://www.ncbi.nlm.nih.gov/gene/?term=313536' target="_blank"> 313536 </a>	beta-1,4-galactosyltransferase 2	protein_coding	protein_coding	0.0783057	1.05578	0.667195	0.822581	Not regulated	4.27	4.11	5.3	4.59	4.25	5.47	4.8
B4galt3	<a href='https://www.ncbi.nlm.nih.gov/gene/?term=494342' target="_blank"> 494342 </a>	beta-1,4-galactosyltransferase 3	protein_coding	protein_coding	-0.0724644	-1.05151	0.443512	0.661427	Not regulated	24.65	26.15	23.67	24.23	24.94	21.53	24.02
B4galt4	<a href='https://www.ncbi.nlm.nih.gov/gene/?term=303923' target="_blank"> 303923 </a>	beta-1,4-galactosyltransferase 4	protein_coding	protein_coding	-0.472758	-1.38776	0.00500314	0.0316667	Not regulated	7.35	6.63	6.9	5.3	4.33	5.17	4.7
B4galt5	<a href='https://www.ncbi.nlm.nih.gov/gene/?term=362275' target="_blank"> 362275 </a>	beta-1,4-galactosyltransferase 5	protein_coding	protein_coding	0.716589	1.64329	3.00744e-07	1.12974e-05	Up in F_UVB_WT_MG	5.76	4.55	5.55	4.14	7.31	8.13	8.12
B4galt6	<a href='https://www.ncbi.nlm.nih.gov/gene/?term=65196' target="_blank"> 65196 </a>	beta-1,4-galactosyltransferase 6	protein_coding	protein_coding	0.227807	1.17105	0.344662	0.570348	Not regulated	1.28	1.17	0.96	0.75	0.93	1.19	1.4
B4galt7	<a href='https://www.ncbi.nlm.nih.gov/gene/?term=364675' target="_blank"> 364675 </a>	beta-1,4-galactosyltransferase 7	protein_coding	protein_coding	0.0887764	1.06347	0.477129	0.687045	Not regulated	22.47	23.04	19.75	21.91	25.69	21.28	22.76
B4gat1	<a href='https://www.ncbi.nlm.nih.gov/gene/?term=293667' target="_blank"> 293667 </a>	beta-1,4-glucuronyltransferase 1			0.139222	1.10131	0.171126	0.372715	Not regulated	13.38	12.01	13.64	13.01	13.62	15.16	14.28
B630019K06Rik	<a href='https://www.ncbi.nlm.nih.gov/gene/?term=NA' target="_blank"> NA </a>				0.196557	1.14596	0.602738	0.782735	Not regulated	0.57	0.55	0.75	0.5	0.7	0.63	0.71
B9d1	<a href='https://www.ncbi.nlm.nih.gov/gene/?term=287383' target="_blank"> 287383 </a>	B9 domain containing 1	protein_coding	protein_coding	-0.161352	-1.11833	0.19034	0.39789	Not regulated	31.74	32.49	30.86	30.62	23.75	30.74	26.45
B9d2	<a href='https://www.ncbi.nlm.nih.gov/gene/?term=308443' target="_blank"> 308443 </a>	B9 domain containing 2	protein_coding	protein_coding	0.263654	1.20052	0.216806	0.433286	Not regulated	6.74	5.29	5.13	5.88	6.74	7.08	6.58
Baalc	<a href='https://www.ncbi.nlm.nih.gov/gene/?term=140720' target="_blank"> 140720 </a>	BAALC binder of MAP3K1 and KLF4	protein_coding	protein_coding	-0.586851	-1.50196	0.194124	0.402786	Not regulated	0.6	0.46	0.91	0.6	0.41	0.49	0.39
Babam1	<a href='https://www.ncbi.nlm.nih.gov/gene/?term=290631' target="_blank"> 290631 </a>	BRISC and BRCA1 A complex member 1	protein_coding	protein_coding	0.00687251	1.00478	0.936575	0.971647	Not regulated	68.18	69.84	70.69	67.45	72.24	73.74	62.51
Babam2	<a href='https://www.ncbi.nlm.nih.gov/gene/?term=362704' target="_blank"> 362704 </a>	BRISC and BRCA1 A complex member 2			-0.289848	-1.22251	0.00495816	0.0314569	Not regulated	31.91	29.44	28.99	28.26	23.6	26.93	21.82
Bace1	<a href='https://www.ncbi.nlm.nih.gov/gene/?term=29392' target="_blank"> 29392 </a>	beta-secretase 1	protein_coding	protein_coding	-0.0455722	-1.03209	0.637126	0.805218	Not regulated	10.12	11.32	11.28	10.66	9.65	11.27	10.69
Bace2	<a href='https://www.ncbi.nlm.nih.gov/gene/?term=288227' target="_blank"> 288227 </a>	beta-secretase 2	protein_coding	protein_coding	-0.383314	-1.30433	0.00879731	0.0479367	Not regulated	72.7	78.22	79.19	61.47	46.19	70.12	52.06
Bach1	<a href='https://www.ncbi.nlm.nih.gov/gene/?term=304127' target="_blank"> 304127 </a>	BTB domain and CNC homolog 1	protein_coding	protein_coding	0.0306843	1.0215	0.787459	0.892722	Not regulated	21.36	25.1	19.56	22.65	22.72	20.31	24.89
Bach2	<a href='https://www.ncbi.nlm.nih.gov/gene/?term=313125' target="_blank"> 313125 </a>	BTB domain and CNC homolog 2	protein_coding	protein_coding	-0.830721	-1.77857	0.00107375	0.00944337	Down in F_UVB_WT_MG	2.33	2.28	2.3	2.03	0.96	1.43	1.51
Bad	<a href='https://www.ncbi.nlm.nih.gov/gene/?term=64639' target="_blank"> 64639 </a>	BCL2-associated agonist of cell death	protein_coding	protein_coding	0.115528	1.08337	0.147929	0.340162	Not regulated	31.4	31.39	31.61	29.03	33.69	31.56	35.05
Bag1	<a href='https://www.ncbi.nlm.nih.gov/gene/?term=297994' target="_blank"> 297994 </a>	BAG cochaperone 1	protein_coding	protein_coding	-0.0271413	-1.01899	0.809613	0.906401	Not regulated	203.44	187.79	188.15	220.69	223.97	180.48	184.46
Bag2	<a href='https://www.ncbi.nlm.nih.gov/gene/?term=690038' target="_blank"> 690038 </a>	BAG cochaperone 2	protein_coding	protein_coding	0.152394	1.11141	0.178092	0.382182	Not regulated	15.45	17.89	16.09	18.14	19.49	18.04	18.82
Bag3	<a href='https://www.ncbi.nlm.nih.gov/gene/?term=293524' target="_blank"> 293524 </a>	BAG cochaperone 3	protein_coding	protein_coding	-0.125486	-1.09087	0.196257	0.405316	Not regulated	56.55	53.9	65.1	52.57	51	54.83	51.38
Bag4	<a href='https://www.ncbi.nlm.nih.gov/gene/?term=361167' target="_blank"> 361167 </a>	BAG cochaperone 4	protein_coding	protein_coding	0.0334894	1.02348	0.63878	0.806082	Not regulated	24.98	26.38	23.67	24.4	27.12	25	24.18
Bag5l1	<a href='https://www.ncbi.nlm.nih.gov/gene/?term=NA' target="_blank"> NA </a>				0.0840653	1.06	0.429757	0.64861	Not regulated	17.68	20.18	16.51	19.11	20.71	17.48	20.19
Bag6	<a href='https://www.ncbi.nlm.nih.gov/gene/?term=94342' target="_blank"> 94342 </a>	BAG cochaperone 6	protein_coding	protein_coding	-0.101691	-1.07303	0.0354064	0.131955	Not regulated	125.99	130.06	126.72	128.85	120.06	117.97	120.33
Bahcc1	<a href='https://www.ncbi.nlm.nih.gov/gene/?term=360674' target="_blank"> 360674 </a>	BAH domain and coiled-coil containing 1	protein_coding	protein_coding	-0.044857	-1.03158	0.668931	0.824081	Not regulated	3.22	2.74	2.89	2.79	2.76	2.89	2.82
Bahd1	<a href='https://www.ncbi.nlm.nih.gov/gene/?term=362194' target="_blank"> 362194 </a>	bromo adjacent homology domain containing 1	protein_coding	protein_coding	-0.293269	-1.22541	0.000139095	0.00185711	Not regulated	34.43	33.12	36.32	35.68	26.41	29.86	29.34
Baiap2	<a href='https://www.ncbi.nlm.nih.gov/gene/?term=117542' target="_blank"> 117542 </a>	BAR/IMD domain containing adaptor protein 2	protein_coding	protein_coding	0.131774	1.09564	0.0735894	0.216407	Not regulated	76.82	80.54	69.33	69.36	78.7	82.88	83.06
Baiap2l1	<a href='https://www.ncbi.nlm.nih.gov/gene/?term=304282' target="_blank"> 304282 </a>	BAR/IMD domain containing adaptor protein 2 like 1	protein_coding	protein_coding	-0.0134564	-1.00937	0.889411	0.949677	Not regulated	19.9	20.3	19.15	22.18	19.38	19.69	21.58
Baiap3	<a href='https://www.ncbi.nlm.nih.gov/gene/?term=106146145' target="_blank"> 106146145 </a>	BAI1-associated protein 3	protein_coding	protein_coding	0.306227	1.23647	0.387067	0.60885	Not regulated	0.53	0.53	0.47	0.44	0.78	0.6	0.45
Bak1	<a href='https://www.ncbi.nlm.nih.gov/gene/?term=116502' target="_blank"> 116502 </a>	BCL2-antagonist/killer 1	protein_coding	protein_coding	0.111965	1.0807	0.277822	0.501763	Not regulated	27.64	26.32	25.58	26.72	25.47	33.07	27.91
Bambi	<a href='https://www.ncbi.nlm.nih.gov/gene/?term=83837' target="_blank"> 83837 </a>	BMP and activin membrane-bound inhibitor	protein_coding	protein_coding	-0.708995	-1.63467	0.00240506	0.0178474	Down in F_UVB_WT_MG	8.69	7.6	8.36	5.47	3.98	4.24	5.67
Banf1	<a href='https://www.ncbi.nlm.nih.gov/gene/?term=114087' target="_blank"> 114087 </a>	BAF nuclear assembly factor 1	protein_coding	protein_coding	0.0351885	1.02469	0.727632	0.859658	Not regulated	183.22	174.82	179.29	169.61	183.12	204.22	156.97
Banp	<a href='https://www.ncbi.nlm.nih.gov/gene/?term=292064' target="_blank"> 292064 </a>	Btg3 associated nuclear protein	protein_coding	protein_coding	-0.140742	-1.10247	0.395134	0.615352	Not regulated	8.64	10.27	10.01	8.67	8.81	10.2	6.58
Bap1	<a href='https://www.ncbi.nlm.nih.gov/gene/?term=306257' target="_blank"> 306257 </a>	Brca1 associated protein 1	protein_coding	protein_coding	0.0355909	1.02498	0.662829	0.820241	Not regulated	72.13	76.4	65.02	75.3	77.31	70.41	74.83
Bard1	<a href='https://www.ncbi.nlm.nih.gov/gene/?term=64557' target="_blank"> 64557 </a>	BRCA1 associated RING domain 1	protein_coding	protein_coding	0.633399	1.55122	0.0069303	0.0399649	Up in F_UVB_WT_MG	2.69	2.19	2.91	2.9	3.23	5.72	3.74
Barx2	<a href='https://www.ncbi.nlm.nih.gov/gene/?term=679701' target="_blank"> 679701 </a>	BARX homeobox 2	protein_coding	protein_coding	-0.0347052	-1.02435	0.789782	0.89426	Not regulated	54.13	56.91	55.42	43.63	42.08	55.85	56.34
Batf	<a href='https://www.ncbi.nlm.nih.gov/gene/?term=299206' target="_blank"> 299206 </a>	basic leucine zipper ATF-like transcription factor	protein_coding	protein_coding	0.563543	1.47789	0.193175	0.401644	Not regulated	1.38	1.81	2.09	0.82	2.48	2.58	1.76
Batf2	<a href='https://www.ncbi.nlm.nih.gov/gene/?term=309178' target="_blank"> 309178 </a>	basic leucine zipper ATF-like transcription factor 2	protein_coding	protein_coding	-2.14122	-4.41134	1.62878e-05	0.000317123	Down in F_UVB_WT_MG	2.29	4.93	3.39	2.76	1.1	0.64	0.52
Bax	<a href='https://www.ncbi.nlm.nih.gov/gene/?term=24887' target="_blank"> 24887 </a>	BCL2 associated X, apoptosis regulator	protein_coding	protein_coding	0.159231	1.11669	0.131706	0.315971	Not regulated	17.89	20.37	20.06	20.73	23.84	21.57	20.83
Baz1a	<a href='https://www.ncbi.nlm.nih.gov/gene/?term=314126' target="_blank"> 314126 </a>	bromodomain adjacent to zinc finger domain, 1A	protein_coding	protein_coding	0.222225	1.16653	0.0503291	0.16816	Not regulated	22.26	24.08	20.65	23.73	30.49	23.37	25.48
Baz1b	<a href='https://www.ncbi.nlm.nih.gov/gene/?term=368002' target="_blank"> 368002 </a>	bromodomain adjacent to zinc finger domain, 1B	protein_coding	protein_coding	0.145738	1.1063	0.0497777	0.166905	Not regulated	25.51	27.56	25.63	25.88	28.06	31.72	26.8
Baz2a	<a href='https://www.ncbi.nlm.nih.gov/gene/?term=304601' target="_blank"> 304601 </a>	bromodomain adjacent to zinc finger domain, 2A	protein_coding	protein_coding	-0.0285448	-1.01998	0.61805	0.793562	Not regulated	27.4	27.52	26.78	25.95	26.77	25.81	26.65
Baz2b	<a href='https://www.ncbi.nlm.nih.gov/gene/?term=317627' target="_blank"> 317627 </a>	bromodomain adjacent to zinc finger domain, 2B	protein_coding	protein_coding	-0.29198	-1.22432	0.0445342	0.154464	Not regulated	11.45	11.04	9.27	7.77	7.45	7.81	9
Bbof1	<a href='https://www.ncbi.nlm.nih.gov/gene/?term=500693' target="_blank"> 500693 </a>	basal body orientation factor 1			-0.0677007	-1.04805	0.621327	0.79607	Not regulated	9.69	11.81	8.87	11.22	10.95	10.24	10.21
Bbox1	<a href='https://www.ncbi.nlm.nih.gov/gene/?term=64564' target="_blank"> 64564 </a>	gamma-butyrobetaine hydroxylase 1	protein_coding	protein_coding	-1.71589	-3.28498	6.35329e-06	0.000145895	Down in F_UVB_WT_MG	3.82	2.38	2.18	2.31	0.47	0.65	1.32
Bbs1	<a href='https://www.ncbi.nlm.nih.gov/gene/?term=309156' target="_blank"> 309156 </a>	Bardet-Biedl syndrome 1	protein_coding	protein_coding	-0.532709	-1.44664	0.0240522	0.100328	Not regulated	3.75	3.8	4.09	3.3	1.68	3.33	2.68
Bbs10	<a href='https://www.ncbi.nlm.nih.gov/gene/?term=500832' target="_blank"> 500832 </a>	Bardet-Biedl syndrome 10	protein_coding	protein_coding	-0.156955	-1.11493	0.373203	0.595341	Not regulated	3.66	3.11	3.1	2.83	2.84	2.82	2.88
Bbs2	<a href='https://www.ncbi.nlm.nih.gov/gene/?term=113948' target="_blank"> 113948 </a>	Bardet-Biedl syndrome 2	protein_coding	protein_coding	-0.227778	-1.17103	0.143842	0.333785	Not regulated	5.11	5.17	4.55	4.34	3.83	3.97	4.63
Bbs4	<a href='https://www.ncbi.nlm.nih.gov/gene/?term=300754' target="_blank"> 300754 </a>	Bardet-Biedl syndrome 4	protein_coding	protein_coding	-0.231697	-1.17422	0.0548322	0.177974	Not regulated	9.52	9.36	8.44	9.61	7.73	8.72	7.27
Bbs5	<a href='https://www.ncbi.nlm.nih.gov/gene/?term=362142' target="_blank"> 362142 </a>	Bardet-Biedl syndrome 5	protein_coding	protein_coding	0.000603198	1.00042	0.997329	0.998906	Not regulated	5.17	7.02	6.02	6.13	6.11	6.03	6.23
Bbs7	<a href='https://www.ncbi.nlm.nih.gov/gene/?term=361930' target="_blank"> 361930 </a>	Bardet-Biedl syndrome 7	protein_coding	protein_coding	0.264617	1.20132	0.1519	0.345457	Not regulated	4.03	3.45	2.95	2.79	3.74	4.13	4.04
Bbs9	<a href='https://www.ncbi.nlm.nih.gov/gene/?term=315484' target="_blank"> 315484 </a>	Bardet-Biedl syndrome 9	protein_coding	protein_coding	-0.245848	-1.18579	0.0817823	0.231885	Not regulated	5.54	5.61	5.9	4.51	4.5	5.09	3.99
Bbx	<a href='https://www.ncbi.nlm.nih.gov/gene/?term=303970' target="_blank"> 303970 </a>	BBX high mobility group box domain containing	protein_coding	protein_coding	-0.171364	-1.12612	0.301401	0.525988	Not regulated	5.24	6.35	6.94	5.28	4.72	5.88	5.49
Bcam	<a href='https://www.ncbi.nlm.nih.gov/gene/?term=78958' target="_blank"> 78958 </a>	basal cell adhesion molecule (Lutheran blood group)	protein_coding	protein_coding	-0.00185089	-1.00128	0.978773	0.990709	Not regulated	84.82	78.87	86.04	80.3	79.19	87.4	83.09
Bcap29	<a href='https://www.ncbi.nlm.nih.gov/gene/?term=298943' target="_blank"> 298943 </a>	B-cell receptor-associated protein 29	protein_coding	protein_coding	-0.0670819	-1.0476	0.552003	0.747889	Not regulated	48.89	52.02	50.59	56.69	46.55	52.59	50.55
Bcap31	<a href='https://www.ncbi.nlm.nih.gov/gene/?term=293852' target="_blank"> 293852 </a>	B-cell receptor-associated protein 31	protein_coding	protein_coding	0.158481	1.11611	0.0313605	0.120809	Not regulated	229.98	238.65	246.83	234.56	282.51	259.18	252.8
Bcar1	<a href='https://www.ncbi.nlm.nih.gov/gene/?term=25414' target="_blank"> 25414 </a>	BCAR1 scaffold protein, Cas family member	protein_coding	protein_coding	0.317481	1.24615	0.0167901	0.077526	Not regulated	17.91	15.87	17.03	13.25	18.03	23.15	18.88
Bcar3	<a href='https://www.ncbi.nlm.nih.gov/gene/?term=310838' target="_blank"> 310838 </a>	BCAR3 adaptor protein, NSP family member	protein_coding	protein_coding	-0.101306	-1.07274	0.331591	0.55747	Not regulated	24.69	29.16	27.14	28.28	28.47	23.96	23.91
Bcas1	<a href='https://www.ncbi.nlm.nih.gov/gene/?term=246755' target="_blank"> 246755 </a>	brain enriched myelin associated protein 1	protein_coding	protein_coding	-0.23778	-1.17918	0.503023	0.711163	Not regulated	3.44	6.06	2.37	3.45	1.85	3.7	4.28
Bcas2	<a href='https://www.ncbi.nlm.nih.gov/gene/?term=295334' target="_blank"> 295334 </a>	BCAS2, pre-mRNA processing factor	protein_coding	protein_coding	0.149222	1.10897	0.0762026	0.221114	Not regulated	46.14	46.35	42.4	44.79	50.18	51.7	47.79
Bcat1	<a href='https://www.ncbi.nlm.nih.gov/gene/?term=29592' target="_blank"> 29592 </a>	branched chain amino acid transaminase 1	protein_coding	protein_coding	0.28449	1.21798	0.231785	0.449901	Not regulated	2.79	4.31	3.84	4.45	3.63	4.27	6.1
Bcat2	<a href='https://www.ncbi.nlm.nih.gov/gene/?term=64203' target="_blank"> 64203 </a>	branched chain amino acid transaminase 2	protein_coding	protein_coding	0.326932	1.25434	0.000613126	0.00609824	Not regulated	161.45	182.71	173.76	193.8	243.66	218.61	207.96
Bccip	<a href='https://www.ncbi.nlm.nih.gov/gene/?term=361666' target="_blank"> 361666 </a>	BRCA2 and CDKN1A interacting protein	protein_coding	protein_coding	0.0688055	1.04885	0.483035	0.692699	Not regulated	34.84	33.65	29.83	36.24	35.47	35.84	34.65
Bcdin3d	<a href='https://www.ncbi.nlm.nih.gov/gene/?term=363001' target="_blank"> 363001 </a>	BCDIN3 domain containing RNA methyltransferase	protein_coding	protein_coding	0.117027	1.0845	0.56658	0.757289	Not regulated	5.66	6.78	7.21	6.55	8.4	6.95	5.97
Bche	<a href='https://www.ncbi.nlm.nih.gov/gene/?term=65036' target="_blank"> 65036 </a>	butyrylcholinesterase	protein_coding	protein_coding	-0.0592955	-1.04196	0.624842	0.797689	Not regulated	14.41	15.54	17.1	19.09	15.52	15.49	16.65
Bckdha	<a href='https://www.ncbi.nlm.nih.gov/gene/?term=25244' target="_blank"> 25244 </a>	branched chain keto acid dehydrogenase E1 subunit alpha	protein_coding	protein_coding	-0.027712	-1.01939	0.765324	0.880684	Not regulated	203.11	206.33	199.22	221.98	226.5	185.82	198.9
Bckdhb	<a href='https://www.ncbi.nlm.nih.gov/gene/?term=29711' target="_blank"> 29711 </a>	branched chain keto acid dehydrogenase E1 subunit beta	protein_coding	protein_coding	-0.290674	-1.22321	0.0516249	0.170814	Not regulated	346.73	400.94	413.35	411.74	306.86	253.98	404.28
Bckdk	<a href='https://www.ncbi.nlm.nih.gov/gene/?term=29603' target="_blank"> 29603 </a>	branched chain ketoacid dehydrogenase kinase	protein_coding	protein_coding	0.0752288	1.05353	0.302587	0.527435	Not regulated	123.88	124.28	121.37	115.68	125.88	140.23	117.33
Bcl10	<a href='https://www.ncbi.nlm.nih.gov/gene/?term=83477' target="_blank"> 83477 </a>	BCL10, immune signaling adaptor	protein_coding	protein_coding	0.139019	1.10116	0.0814862	0.231365	Not regulated	41.16	41.54	38.23	39.27	41.98	43.14	47
Bcl11a	<a href='https://www.ncbi.nlm.nih.gov/gene/?term=305589' target="_blank"> 305589 </a>	BAF chromatin remodeling complex subunit BCL11A	protein_coding	protein_coding	-0.133227	-1.09674	0.160486	0.357787	Not regulated	21.41	22.6	20.11	20.29	20.55	18.75	20.79
Bcl11b	<a href='https://www.ncbi.nlm.nih.gov/gene/?term=314423' target="_blank"> 314423 </a>	BAF chromatin remodeling complex subunit BCL11B	protein_coding	protein_coding	0.209127	1.15599	0.0258912	0.105841	Not regulated	14.25	14.44	14.61	15.38	18.13	15.3	17.16
Bcl2a1	<a href='https://www.ncbi.nlm.nih.gov/gene/?term=170929' target="_blank"> 170929 </a>	BCL2-related protein A1	protein_coding	protein_coding	-0.144032	-1.10499	0.700004	0.842866	Not regulated	9.94	5.67	5.18	3.85	4.08	6.65	6.06
Bcl2l1	<a href='https://www.ncbi.nlm.nih.gov/gene/?term=24888' target="_blank"> 24888 </a>	Bcl2-like 1	protein_coding	protein_coding	-0.270382	-1.20613	0.00111716	0.00974807	Not regulated	69.5	79.06	65.1	74.37	60.11	57.67	61.59
Bcl2l11	<a href='https://www.ncbi.nlm.nih.gov/gene/?term=64547' target="_blank"> 64547 </a>	BCL2 like 11	protein_coding	protein_coding	-0.511567	-1.4256	0.000298324	0.00347079	Down in F_UVB_WT_MG	10.83	8.09	7.49	8.43	4.32	4.56	7.62
Bcl2l12	<a href='https://www.ncbi.nlm.nih.gov/gene/?term=361567' target="_blank"> 361567 </a>	BCL2 like 12	protein_coding	protein_coding	0.0456736	1.03216	0.780249	0.888331	Not regulated	12.89	14.1	13	12.9	12.51	16.8	11.85
Bcl2l13	<a href='https://www.ncbi.nlm.nih.gov/gene/?term=312682' target="_blank"> 312682 </a>	BCL2 like 13	protein_coding	protein_coding	0.0536033	1.03785	0.54733	0.744399	Not regulated	52.87	58.17	53.61	62.83	61.35	56.05	59.85
Bcl2l14	<a href='https://www.ncbi.nlm.nih.gov/gene/?term=500348' target="_blank"> 500348 </a>	BCL2 like 14	protein_coding	protein_coding	-0.222985	-1.16715	0.200564	0.411845	Not regulated	8.53	7.82	7.27	6.23	6.9	6.08	6.19
Bcl2l15	<a href='https://www.ncbi.nlm.nih.gov/gene/?term=295337' target="_blank"> 295337 </a>	BCL2-like 15	protein_coding	protein_coding	0.140482	1.10227	0.568922	0.759057	Not regulated	14	10.78	14.05	16.79	10.49	16.16	19.5
Bcl2l2	<a href='https://www.ncbi.nlm.nih.gov/gene/?term=60434' target="_blank"> 60434 </a>	Bcl2-like 2	protein_coding	protein_coding	0.021761	1.0152	0.799232	0.900957	Not regulated	33.59	37.02	37.52	39.76	38.85	35.94	37.91
Bcl3	<a href='https://www.ncbi.nlm.nih.gov/gene/?term=680611' target="_blank"> 680611 </a>	BCL3, transcription coactivator	protein_coding	protein_coding	1.18386	2.27184	2.6079e-14	5.59352e-12	Up in F_UVB_WT_MG	7.19	10.42	8.37	7.49	19.67	20.56	17.05
Bcl6	<a href='https://www.ncbi.nlm.nih.gov/gene/?term=303836' target="_blank"> 303836 </a>	BCL6, transcription repressor	protein_coding	protein_coding	0.313607	1.24281	0.00556915	0.034135	Not regulated	32.45	31.47	27.76	32.87	44.08	34.84	37.12
Bcl6b	<a href='https://www.ncbi.nlm.nih.gov/gene/?term=360551' target="_blank"> 360551 </a>	BCL6B, transcription repressor	protein_coding	protein_coding	0.0279171	1.01954	0.91524	0.961534	Not regulated	2.25	2.24	2.16	1.51	1.91	2.85	1.53
Bcl7a	<a href='https://www.ncbi.nlm.nih.gov/gene/?term=690085' target="_blank"> 690085 </a>	BAF chromatin remodeling complex subunit BCL7A	protein_coding	protein_coding	-0.384616	-1.30551	0.0742848	0.217634	Not regulated	5.66	7.24	6.4	6.56	4.41	5.86	4.71
Bcl7b	<a href='https://www.ncbi.nlm.nih.gov/gene/?term=368001' target="_blank"> 368001 </a>	BAF chromatin remodeling complex subunit BCL7B	protein_coding	protein_coding	-0.0625071	-1.04428	0.474539	0.685146	Not regulated	29.82	31.29	28.14	29.55	29.83	27.24	28.25
Bcl7c	<a href='https://www.ncbi.nlm.nih.gov/gene/?term=293514' target="_blank"> 293514 </a>	BAF chromatin remodeling complex subunit BCL7C	protein_coding	protein_coding	0.0171021	1.01192	0.859446	0.935493	Not regulated	81.75	81.28	82.92	92.47	91.79	91.68	83.21
Bcl9	<a href='https://www.ncbi.nlm.nih.gov/gene/?term=310704' target="_blank"> 310704 </a>	BCL9, transcription coactivator	protein_coding	protein_coding	-0.139917	-1.10184	0.167461	0.368083	Not regulated	7.73	6.78	7.19	6.98	6.02	7.29	6.27
Bcl9l	<a href='https://www.ncbi.nlm.nih.gov/gene/?term=300673' target="_blank"> 300673 </a>	BCL9 like	protein_coding	protein_coding	-0.109862	-1.07912	0.15445	0.349476	Not regulated	38.65	41.31	36.01	34.48	32.97	35.37	36.41
Bclaf1	<a href='https://www.ncbi.nlm.nih.gov/gene/?term=293017' target="_blank"> 293017 </a>	BCL2-associated transcription factor 1	protein_coding	protein_coding	0.163714	1.12017	0.046313	0.158498	Not regulated	51.97	56.82	45.69	52.19	60.92	53.54	62.31
Bclaf3	<a href='https://www.ncbi.nlm.nih.gov/gene/?term=501559' target="_blank"> 501559 </a>	BCLAF1 and THRAP3 family member 3			-0.250461	-1.18959	0.0457482	0.157199	Not regulated	8.32	7.3	8.09	7.25	6.34	6.25	7.08
Bco2	<a href='https://www.ncbi.nlm.nih.gov/gene/?term=315644' target="_blank"> 315644 </a>	beta-carotene oxygenase 2			0.965908	1.95329	0.0653957	0.200172	Not regulated	0.22	0.43	0.28	0.22	0.33	0.75	0.64
Bcor	<a href='https://www.ncbi.nlm.nih.gov/gene/?term=317346' target="_blank"> 317346 </a>	BCL6 co-repressor	protein_coding	protein_coding	-0.108019	-1.07775	0.133988	0.318944	Not regulated	14.25	13.98	13.67	15.01	13.26	13.36	13.04
Bcorl1	<a href='https://www.ncbi.nlm.nih.gov/gene/?term=302810' target="_blank"> 302810 </a>	BCL6 co-repressor-like 1	protein_coding	protein_coding	-0.10478	-1.07533	0.309335	0.533879	Not regulated	4.43	4.96	4.88	4.67	4.19	4.89	4.19
Bcr	<a href='https://www.ncbi.nlm.nih.gov/gene/?term=309696' target="_blank"> 309696 </a>	BCR activator of RhoGEF and GTPase	protein_coding	protein_coding	-0.103123	-1.0741	0.353938	0.57789	Not regulated	22.22	27.12	21.7	25.27	21.39	24.57	19.94
Bcs1l	<a href='https://www.ncbi.nlm.nih.gov/gene/?term=301514' target="_blank"> 301514 </a>	BCS1 homolog, ubiquinol-cytochrome c reductase complex chaperone	protein_coding	protein_coding	0.0539789	1.03812	0.672857	0.82482	Not regulated	11.17	12.22	12.87	12.91	12.9	13.94	11.6
Bdh1	<a href='https://www.ncbi.nlm.nih.gov/gene/?term=117099' target="_blank"> 117099 </a>	3-hydroxybutyrate dehydrogenase 1	protein_coding	protein_coding	0.440829	1.35738	0.00434235	0.0282923	Not regulated	135.22	139.69	112	182.29	213.13	188.51	178.21
Bdh2	<a href='https://www.ncbi.nlm.nih.gov/gene/?term=295458' target="_blank"> 295458 </a>	3-hydroxybutyrate dehydrogenase 2	protein_coding	protein_coding	-0.542217	-1.45621	0.106806	0.275075	Not regulated	3.35	4.51	3.16	2.06	2.16	2.63	1.98
Bdkrb2	<a href='https://www.ncbi.nlm.nih.gov/gene/?term=25245' target="_blank"> 25245 </a>	bradykinin receptor B2	protein_coding	protein_coding	1.16409	2.24092	7.66027e-11	8.08463e-09	Up in F_UVB_WT_MG	1.3	1.67	1.35	1.43	3.46	3.31	2.91
Bdnf	<a href='https://www.ncbi.nlm.nih.gov/gene/?term=24225' target="_blank"> 24225 </a>	brain-derived neurotrophic factor	protein_coding	protein_coding	0.125129	1.0906	0.801232	0.90226	Not regulated	0.35	0.2	0.45	0.23	0.2	0.36	0.44
Bdp1	<a href='https://www.ncbi.nlm.nih.gov/gene/?term=294687' target="_blank"> 294687 </a>	B double prime 1, subunit of RNA polymerase III transcription initiation factor IIIB	protein_coding	protein_coding	-0.0422639	-1.02973	0.599483	0.78044	Not regulated	6.87	7.87	7.7	7.87	7.27	7.38	7.46
Becn1	<a href='https://www.ncbi.nlm.nih.gov/gene/?term=114558' target="_blank"> 114558 </a>	beclin 1	retained_intron	protein_coding	0.133566	1.097	0.0398043	0.142671	Not regulated	55.84	60.89	57.93	60.54	60.7	66.28	65.57
Begain	<a href='https://www.ncbi.nlm.nih.gov/gene/?term=79146' target="_blank"> 79146 </a>	brain-enriched guanylate kinase-associated	protein_coding	protein_coding	-0.277691	-1.21225	0.135429	0.321023	Not regulated	4.32	4.74	4.32	3.1	3.44	3.73	3.13
Bend3	<a href='https://www.ncbi.nlm.nih.gov/gene/?term=683923' target="_blank"> 683923 </a>	BEN domain containing 3	protein_coding	protein_coding	0.0686495	1.04873	0.731822	0.861753	Not regulated	1.71	2.49	1.96	2.32	2.11	1.98	2.59
Bend5	<a href='https://www.ncbi.nlm.nih.gov/gene/?term=362564' target="_blank"> 362564 </a>	BEN domain containing 5	protein_coding	protein_coding	-0.619011	-1.53582	0.0365669	0.134536	Not regulated	2.91	1.97	2.12	2.29	1.72	1.1	1.68
Bend6	<a href='https://www.ncbi.nlm.nih.gov/gene/?term=363212' target="_blank"> 363212 </a>	BEN domain containing 6	protein_coding	protein_coding	-0.106864	-1.07688	0.799999	0.901501	Not regulated	1.45	1.83	1.25	0.95	1.01	1.82	0.68
Bend7	<a href='https://www.ncbi.nlm.nih.gov/gene/?term=361275' target="_blank"> 361275 </a>	BEN domain containing 7	protein_coding	protein_coding	0.707575	1.63306	0.0189933	0.0848608	Not regulated	0.98	0.7	0.82	1.02	1.19	1.22	1.89
Best2	<a href='https://www.ncbi.nlm.nih.gov/gene/?term=364973' target="_blank"> 364973 </a>	bestrophin 2	protein_coding	protein_coding	-1.49017	-2.80923	8.3367e-06	0.000184155	Down in F_UVB_WT_MG	2.55	2.02	2.69	2.13	0.49	1.16	0.89
Bet1	<a href='https://www.ncbi.nlm.nih.gov/gene/?term=29631' target="_blank"> 29631 </a>	Bet1 golgi vesicular membrane trafficking protein	protein_coding	protein_coding	-0.116173	-1.08386	0.448981	0.665272	Not regulated	22.48	23.77	33.6	34.59	24.73	28.94	24.92
Bet1l	<a href='https://www.ncbi.nlm.nih.gov/gene/?term=54400' target="_blank"> 54400 </a>	Bet1 golgi vesicular membrane trafficking protein-like	protein_coding	protein_coding	-0.0420334	-1.02956	0.63755	0.805371	Not regulated	40.42	46.5	40.53	41.91	41.84	40.25	41.02
Bex3	<a href='https://www.ncbi.nlm.nih.gov/gene/?term=117089' target="_blank"> 117089 </a>	brain expressed X-linked 3			-0.107681	-1.0775	0.30745	0.531835	Not regulated	43.93	46.13	44.23	39.87	38.9	44.48	37.4
Bfar	<a href='https://www.ncbi.nlm.nih.gov/gene/?term=304709' target="_blank"> 304709 </a>	bifunctional apoptosis regulator	protein_coding	protein_coding	0.109098	1.07855	0.266279	0.490051	Not regulated	14.93	16.24	15.6	15.43	18.05	16.24	15.95
Bfsp1	<a href='https://www.ncbi.nlm.nih.gov/gene/?term=25394' target="_blank"> 25394 </a>	beaded filament structural protein 1	protein_coding	protein_coding	-0.191229	-1.14174	0.331427	0.55747	Not regulated	4.85	4.55	4.82	4.4	4.13	5.04	3.13
Bgn	<a href='https://www.ncbi.nlm.nih.gov/gene/?term=25181' target="_blank"> 25181 </a>	biglycan	protein_coding	protein_coding	0.0572402	1.04047	0.56223	0.754211	Not regulated	138.15	129.91	132.99	113.72	117.56	142.19	143.16
Bhlha15	<a href='https://www.ncbi.nlm.nih.gov/gene/?term=25334' target="_blank"> 25334 </a>	basic helix-loop-helix family, member a15	protein_coding	protein_coding	0.461936	1.37739	0.0029774	0.0211165	Not regulated	5.01	4.86	4.26	5.67	6.05	8.17	6.31
Bhlhb9	<a href='https://www.ncbi.nlm.nih.gov/gene/?term=317407' target="_blank"> 317407 </a>	basic helix-loop-helix family member B9	protein_coding	protein_coding	-0.14356	-1.10463	0.333044	0.559264	Not regulated	3.06	3.62	3.69	3.47	2.94	3.95	2.86
Bhlhe22	<a href='https://www.ncbi.nlm.nih.gov/gene/?term=365748' target="_blank"> 365748 </a>	basic helix-loop-helix family, member e22	protein_coding	protein_coding	0.179261	1.1323	0.629442	0.799916	Not regulated	0.52	0.51	0.41	0.59	0.45	0.59	0.68
Bhlhe40	<a href='https://www.ncbi.nlm.nih.gov/gene/?term=79431' target="_blank"> 79431 </a>	basic helix-loop-helix family, member e40	protein_coding	protein_coding	-0.288769	-1.2216	0.00148548	0.0122013	Not regulated	45.77	42.67	44.88	40.42	36.22	38.61	32.1
Bhlhe41	<a href='https://www.ncbi.nlm.nih.gov/gene/?term=117095' target="_blank"> 117095 </a>	basic helix-loop-helix family, member e41	protein_coding	protein_coding	0.273561	1.20879	0.10902	0.279087	Not regulated	47.6	42.88	59.31	61.64	67.14	61.78	55.19
Bicc1	<a href='https://www.ncbi.nlm.nih.gov/gene/?term=361832' target="_blank"> 361832 </a>	BicC family RNA binding protein 1	protein_coding	protein_coding	0.664464	1.58498	0.000291707	0.00339975	Up in F_UVB_WT_MG	4.08	3.81	3.67	2.98	4.31	6.68	6.63
Bicd2	<a href='https://www.ncbi.nlm.nih.gov/gene/?term=306809' target="_blank"> 306809 </a>	BICD cargo adaptor 2	protein_coding	protein_coding	-0.255411	-1.19368	0.00152414	0.0124919	Not regulated	32.76	32.9	33.07	29.39	24.62	27.1	28.97
Bicdl1	<a href='https://www.ncbi.nlm.nih.gov/gene/?term=304537' target="_blank"> 304537 </a>	BICD family like cargo adaptor 1			-0.724216	-1.652	2.55847e-07	9.86162e-06	Down in F_UVB_WT_MG	28.38	39.13	28.32	32.58	16.28	19.99	22.21
Bicdl2	<a href='https://www.ncbi.nlm.nih.gov/gene/?term=302964' target="_blank"> 302964 </a>	BICD family like cargo adaptor 2			-0.291258	-1.22371	0.00330257	0.0229695	Not regulated	44.9	40.62	43.59	40.31	30.3	37.64	35.89
Bicra	<a href='https://www.ncbi.nlm.nih.gov/gene/?term=292622' target="_blank"> 292622 </a>	BRD4 interacting chromatin remodeling complex associated protein			-0.0034351	-1.00238	0.959506	0.981425	Not regulated	14.18	14.34	13.66	13.26	14.14	13.67	13.76
Bicral	<a href='https://www.ncbi.nlm.nih.gov/gene/?term=301235' target="_blank"> 301235 </a>	BICRA like chromatin remodeling complex associated protein			-0.155628	-1.11391	0.186046	0.392445	Not regulated	10.49	11.56	9.12	10.2	8.3	9.14	10.41
Bid	<a href='https://www.ncbi.nlm.nih.gov/gene/?term=64625' target="_blank"> 64625 </a>	BH3 interacting domain death agonist	protein_coding	protein_coding	-0.153622	-1.11236	0.380561	0.603255	Not regulated	5.6	5.52	5.07	5.65	4.82	5.55	6.06
Bik	<a href='https://www.ncbi.nlm.nih.gov/gene/?term=114496' target="_blank"> 114496 </a>	BCL2-interacting killer	protein_coding	protein_coding	-0.599742	-1.51545	0.0116491	0.0594661	Not regulated	10.49	7.13	9.86	7.4	5.57	6.6	5.14
Bin1	<a href='https://www.ncbi.nlm.nih.gov/gene/?term=117028' target="_blank"> 117028 </a>	bridging integrator 1	protein_coding	protein_coding	-0.0210319	-1.01468	0.9064	0.957066	Not regulated	20.87	26.27	23.76	17.4	20.7	27.16	17.71
Bin2	<a href='https://www.ncbi.nlm.nih.gov/gene/?term=366988' target="_blank"> 366988 </a>	bridging integrator 2	protein_coding	protein_coding	0.061198	1.04333	0.860562	0.936222	Not regulated	3.98	2.15	2.59	1.66	2.07	2.63	3.12
Bin3	<a href='https://www.ncbi.nlm.nih.gov/gene/?term=361065' target="_blank"> 361065 </a>	bridging integrator 3	protein_coding	protein_coding	-0.0586013	-1.04146	0.506207	0.713978	Not regulated	90.39	89.56	86.45	104.09	88.32	88.04	89.12
Birc2	<a href='https://www.ncbi.nlm.nih.gov/gene/?term=60371' target="_blank"> 60371 </a>	baculoviral IAP repeat-containing 2	protein_coding	protein_coding	-0.208017	-1.1551	0.0718321	0.213315	Not regulated	16.32	20.71	16.33	17.25	15.01	14.16	16.72
Birc3	<a href='https://www.ncbi.nlm.nih.gov/gene/?term=78971' target="_blank"> 78971 </a>	baculoviral IAP repeat-containing 3	protein_coding	protein_coding	-0.249371	-1.18869	0.135802	0.321733	Not regulated	5.91	6.21	5.83	4.32	4.71	4.39	4.97
Birc5	<a href='https://www.ncbi.nlm.nih.gov/gene/?term=64041' target="_blank"> 64041 </a>	baculoviral IAP repeat-containing 5	protein_coding	protein_coding	0.745003	1.67598	1.22151e-06	3.64208e-05	Up in F_UVB_WT_MG	8.67	9.99	9.52	9.63	14.89	18.12	15.26
Birc6	<a href='https://www.ncbi.nlm.nih.gov/gene/?term=313876' target="_blank"> 313876 </a>	baculoviral IAP repeat-containing 6	protein_coding	protein_coding	-0.111314	-1.08021	0.139976	0.327884	Not regulated	16	17.68	15.35	17.18	15.95	15.63	14.41
Bivm	<a href='https://www.ncbi.nlm.nih.gov/gene/?term=102548228' target="_blank"> 102548228 </a>	basic, immunoglobulin-like variable motif containing	protein_coding	protein_coding	0.0686699	1.04875	0.627251	0.798659	Not regulated	6.63	6.59	5.19	5.16	5.86	5.96	6.73
Blcap	<a href='https://www.ncbi.nlm.nih.gov/gene/?term=171113' target="_blank"> 171113 </a>	BLCAP, apoptosis inducing factor	protein_coding	protein_coding	-0.158825	-1.11638	0.0516022	0.170783	Not regulated	50.04	52.24	48.14	55.1	47.77	43.68	46.67
Bles03	<a href='https://www.ncbi.nlm.nih.gov/gene/?term=266609' target="_blank"> 266609 </a>	basophilic leukemia expressed protein BLES03	protein_coding	protein_coding	-0.321045	-1.24923	0.000902829	0.00827987	Not regulated	36.68	35.41	37.47	32.1	26.22	29.14	29.87
Blm	<a href='https://www.ncbi.nlm.nih.gov/gene/?term=308755' target="_blank"> 308755 </a>	BLM RecQ like helicase	protein_coding	protein_coding	0.0702667	1.04991	0.631479	0.80151	Not regulated	3.13	3.23	3.34	3.62	3.09	4.12	3.33
Blmh	<a href='https://www.ncbi.nlm.nih.gov/gene/?term=287552' target="_blank"> 287552 </a>	bleomycin hydrolase	protein_coding	protein_coding	0.251936	1.1908	0.047772	0.162059	Not regulated	70.37	61.23	64.9	66.53	61.64	85.59	88.53
Blnk	<a href='https://www.ncbi.nlm.nih.gov/gene/?term=499356' target="_blank"> 499356 </a>	B-cell linker	protein_coding	protein_coding	0.00941613	1.00655	0.959267	0.981332	Not regulated	10.27	9.94	11.61	7.52	8.92	9.16	11.66
Bloc1s1	<a href='https://www.ncbi.nlm.nih.gov/gene/?term=288785' target="_blank"> 288785 </a>	biogenesis of lysosomal organelles complex-1, subunit 1	protein_coding	protein_coding	0.0313516	1.02197	0.752447	0.87312	Not regulated	155.62	141.98	140.2	153.38	159.61	152.97	133.26
Bloc1s2	<a href='https://www.ncbi.nlm.nih.gov/gene/?term=293938' target="_blank"> 293938 </a>	biogenesis of lysosomal organelles complex-1, subunit 2	protein_coding	protein_coding	0.206439	1.15384	0.0342413	0.128627	Not regulated	64.1	63.7	58.56	70.64	73.3	71.56	77.85
Bloc1s3	<a href='https://www.ncbi.nlm.nih.gov/gene/?term=680476' target="_blank"> 680476 </a>	biogenesis of lysosomal organelles complex-1, subunit 3	protein_coding	protein_coding	0.17621	1.12991	0.064837	0.199169	Not regulated	17.65	17.67	15.97	17.93	19.8	18.86	19.99
Bloc1s4	<a href='https://www.ncbi.nlm.nih.gov/gene/?term=364183' target="_blank"> 364183 </a>	biogenesis of lysosomal organelles complex 1 subunit 4	protein_coding	protein_coding	0.0747974	1.05321	0.485789	0.695673	Not regulated	17.41	18.08	16.74	19.39	18	19.95	18.74
Bloc1s5	<a href='https://www.ncbi.nlm.nih.gov/gene/?term=306868' target="_blank"> 306868 </a>	biogenesis of lysosomal organelles complex 1 subunit 5	protein_coding	protein_coding	-0.16148	-1.11843	0.164817	0.364357	Not regulated	20.78	17.97	21.84	19.16	17.78	18.36	17.41
Bloc1s6	<a href='https://www.ncbi.nlm.nih.gov/gene/?term=317630' target="_blank"> 317630 </a>	biogenesis of lysosomal organelles complex 1 subunit 6	protein_coding	protein_coding	-0.250131	-1.18932	0.00632129	0.0374268	Not regulated	13.35	12.93	13.46	14.15	11.55	11.95	10.53
Blvra	<a href='https://www.ncbi.nlm.nih.gov/gene/?term=116599' target="_blank"> 116599 </a>	biliverdin reductase A	protein_coding	protein_coding	-0.186981	-1.13838	0.10682	0.275075	Not regulated	34.22	30.69	33.59	34.81	25.73	29.75	32.5
Blvrb	<a href='https://www.ncbi.nlm.nih.gov/gene/?term=292737' target="_blank"> 292737 </a>	biliverdin reductase B	protein_coding	protein_coding	-0.0505772	-1.03568	0.581206	0.768355	Not regulated	301.93	333.05	319.34	355.2	328.68	323.15	290.4
Blzf1	<a href='https://www.ncbi.nlm.nih.gov/gene/?term=498266' target="_blank"> 498266 </a>	basic leucine zipper nuclear factor 1	protein_coding	protein_coding	-0.237295	-1.17878	0.00871025	0.0475879	Not regulated	24.12	22.31	22.35	22.78	18.05	19.34	20.92
Bmf	<a href='https://www.ncbi.nlm.nih.gov/gene/?term=246142' target="_blank"> 246142 </a>	Bcl2 modifying factor	protein_coding	protein_coding	0.0433349	1.03049	0.81721	0.912449	Not regulated	4.91	4.32	4.78	3.48	4.57	3.55	5.57
Bmi1	<a href='https://www.ncbi.nlm.nih.gov/gene/?term=307151' target="_blank"> 307151 </a>	BMI1 proto-oncogene, polycomb ring finger	protein_coding	protein_coding	-0.0870326	-1.06218	0.424323	0.643368	Not regulated	12.7	12.79	12.76	14.77	12.87	11.69	12.86
Bmp1	<a href='https://www.ncbi.nlm.nih.gov/gene/?term=83470' target="_blank"> 83470 </a>	bone morphogenetic protein 1	protein_coding	protein_coding	0.338207	1.26418	0.000589398	0.00592427	Not regulated	15.2	15.95	15.06	13.5	16.54	18.85	20.39
Bmp2k	<a href='https://www.ncbi.nlm.nih.gov/gene/?term=498333' target="_blank"> 498333 </a>	BMP-2 inducible kinase	protein_coding	protein_coding	-0.0195118	-1.01362	0.779192	0.887878	Not regulated	23.69	24.32	23.51	24.68	23.26	23.35	25.03
Bmp4	<a href='https://www.ncbi.nlm.nih.gov/gene/?term=25296' target="_blank"> 25296 </a>	bone morphogenetic protein 4	protein_coding	protein_coding	-0.300232	-1.23134	0.0490103	0.165416	Not regulated	5.83	6.74	6.76	6.52	4.62	6.35	5.51
Bmp5	<a href='https://www.ncbi.nlm.nih.gov/gene/?term=315824' target="_blank"> 315824 </a>	bone morphogenetic protein 5	protein_coding	protein_coding	-0.546267	-1.4603	0.370809	0.593222	Not regulated	0.68	0.33	0.26	0.39	0.2	0.11	0.53
Bmp6	<a href='https://www.ncbi.nlm.nih.gov/gene/?term=25644' target="_blank"> 25644 </a>	bone morphogenetic protein 6	protein_coding	protein_coding	-0.582649	-1.4976	0.00110163	0.00963778	Down in F_UVB_WT_MG	3.88	4.01	3.89	3.43	2.55	2.01	3.03
Bmp7	<a href='https://www.ncbi.nlm.nih.gov/gene/?term=85272' target="_blank"> 85272 </a>	bone morphogenetic protein 7	protein_coding	protein_coding	0.0299796	1.021	0.77629	0.88656	Not regulated	30.24	25.51	30.66	29.97	29.59	28.16	31.46
Bmp8a	<a href='https://www.ncbi.nlm.nih.gov/gene/?term=680931' target="_blank"> 680931 </a>	bone morphogenetic protein 8a	protein_coding	protein_coding	-0.581575	-1.49648	0.169085	0.37011	Not regulated	1.44	0.94	0.97	1.23	0.47	0.64	1.13
Bmper	<a href='https://www.ncbi.nlm.nih.gov/gene/?term=300455' target="_blank"> 300455 </a>	BMP-binding endothelial regulator	protein_coding	protein_coding	-0.617617	-1.53434	0.136843	0.323277	Not regulated	0.42	0.55	0.52	0.36	0.22	0.42	0.29
Bmpr1a	<a href='https://www.ncbi.nlm.nih.gov/gene/?term=81507' target="_blank"> 81507 </a>	bone morphogenetic protein receptor type 1A	protein_coding	protein_coding	-0.0349529	-1.02452	0.685913	0.834537	Not regulated	40.88	40.59	42.21	45.24	43.16	38.39	42.18
Bmpr1b	<a href='https://www.ncbi.nlm.nih.gov/gene/?term=310914' target="_blank"> 310914 </a>	bone morphogenetic protein receptor type 1B	protein_coding	protein_coding	0.541885	1.45587	0.101608	0.266137	Not regulated	0.72	0.81	1.13	1.31	1.28	1.7	1.36
Bmpr2	<a href='https://www.ncbi.nlm.nih.gov/gene/?term=140590' target="_blank"> 140590 </a>	bone morphogenetic protein receptor type 2	protein_coding	protein_coding	-0.0228934	-1.016	0.726734	0.859564	Not regulated	28.62	30.94	30.52	30.75	27.98	31.05	30.23
Bms1	<a href='https://www.ncbi.nlm.nih.gov/gene/?term=362426' target="_blank"> 362426 </a>	BMS1 ribosome biogenesis factor	protein_coding	protein_coding	0.129642	1.09402	0.0436068	0.1522	Not regulated	19.56	20.13	19.96	19.36	21.68	22.01	21.29
Bmt2	<a href='https://www.ncbi.nlm.nih.gov/gene/?term=500034' target="_blank"> 500034 </a>	base methyltransferase of 25S rRNA 2 homolog			0.0603606	1.04273	0.673577	0.825323	Not regulated	3.87	3.73	3.63	4.02	3.81	3.88	4.23
Bmx	<a href='https://www.ncbi.nlm.nih.gov/gene/?term=367786' target="_blank"> 367786 </a>	BMX non-receptor tyrosine kinase	protein_coding	protein_coding	-0.917092	-1.88831	1.71244e-07	7.11626e-06	Down in F_UVB_WT_MG	10.82	10.07	9.92	9.66	3.82	5.73	6.58
Bmyc	<a href='https://www.ncbi.nlm.nih.gov/gene/?term=311807' target="_blank"> 311807 </a>	brain expressed myelocytomatosis oncogene	protein_coding	protein_coding	0.00295555	1.00205	0.974556	0.988721	Not regulated	77.93	85.01	72.16	83.26	85.58	78.88	74.89
Bnc1	<a href='https://www.ncbi.nlm.nih.gov/gene/?term=365299' target="_blank"> 365299 </a>	basonuclin 1	protein_coding	protein_coding	0.369041	1.29149	0.0598401	0.188567	Not regulated	3.83	2.85	4.18	3.58	3.77	4.45	5.78
Bnc2	<a href='https://www.ncbi.nlm.nih.gov/gene/?term=298189' target="_blank"> 298189 </a>	basonuclin 2	protein_coding	protein_coding	-0.319517	-1.24791	0.0414135	0.146733	Not regulated	6.45	5.94	6.61	4.95	3.77	5.15	5.37
Bnip1	<a href='https://www.ncbi.nlm.nih.gov/gene/?term=140932' target="_blank"> 140932 </a>	BCL2 interacting protein 1	protein_coding	protein_coding	-0.0873227	-1.0624	0.40825	0.628176	Not regulated	36.49	35.16	34.92	39.52	36.27	35.64	30.79
Bnip2	<a href='https://www.ncbi.nlm.nih.gov/gene/?term=300811' target="_blank"> 300811 </a>	BCL2 interacting protein 2	protein_coding	protein_coding	0.15345	1.11223	0.109308	0.279481	Not regulated	32.74	37.91	32.73	30.38	35.98	36.45	40.61
Bnip3	<a href='https://www.ncbi.nlm.nih.gov/gene/?term=84480' target="_blank"> 84480 </a>	BCL2 interacting protein 3	protein_coding	protein_coding	-0.507801	-1.42188	3.61805e-05	0.000625655	Down in F_UVB_WT_MG	65.33	65.4	78.19	69.15	56.36	45.91	44.19
Bnip3l	<a href='https://www.ncbi.nlm.nih.gov/gene/?term=140923' target="_blank"> 140923 </a>	BCL2 interacting protein 3 like	protein_coding	protein_coding	-0.0510918	-1.03605	0.500526	0.708831	Not regulated	210.43	219.86	227.36	223.39	203.62	202.03	219
Bnipl	<a href='https://www.ncbi.nlm.nih.gov/gene/?term=361994' target="_blank"> 361994 </a>	BCL2 interacting protein like	protein_coding	protein_coding	-0.143014	-1.10421	0.100333	0.264622	Not regulated	96.39	88.39	105.33	99.09	88.9	88.52	87.38
Boc	<a href='https://www.ncbi.nlm.nih.gov/gene/?term=360715' target="_blank"> 360715 </a>	BOC cell adhesion associated, oncogene regulated	protein_coding	protein_coding	-0.270318	-1.20607	0.0112994	0.0581724	Not regulated	37.44	36.57	32.71	29.53	26.94	31.74	26.26
Bod1	<a href='https://www.ncbi.nlm.nih.gov/gene/?term=287173' target="_blank"> 287173 </a>	biorientation of chromosomes in cell division 1	protein_coding	protein_coding	0.132966	1.09655	0.396585	0.616777	Not regulated	34.75	42.43	31.67	45.43	49.18	39.29	38.32
Bod1l1	<a href='https://www.ncbi.nlm.nih.gov/gene/?term=207118' target="_blank"> 207118 </a>	biorientation of chromosomes in cell division 1-like 1	protein_coding	protein_coding	-0.0555042	-1.03922	0.502875	0.711029	Not regulated	10.16	11.52	9.73	9.54	9.79	10.27	9.57
Bok	<a href='https://www.ncbi.nlm.nih.gov/gene/?term=29884' target="_blank"> 29884 </a>	BCL2 family apoptosis regulator BOK	protein_coding	protein_coding	-0.446949	-1.36315	3.51973e-06	9.12386e-05	Not regulated	40.22	42.08	43.62	46.2	28.95	32.52	33.52
Bola1	<a href='https://www.ncbi.nlm.nih.gov/gene/?term=365875' target="_blank"> 365875 </a>	bolA family member 1	protein_coding	protein_coding	0.164256	1.12059	0.237035	0.456428	Not regulated	47.74	55.3	50.86	56.27	60.11	64.71	51.35
Bola2	<a href='https://www.ncbi.nlm.nih.gov/gene/?term=502367' target="_blank"> 502367 </a>	bolA family member 2	protein_coding	protein_coding	0.0544422	1.03846	0.537793	0.737124	Not regulated	78.97	84.97	77.36	75.27	77.74	90.15	79.42
Bola3	<a href='https://www.ncbi.nlm.nih.gov/gene/?term=297388' target="_blank"> 297388 </a>	bolA family member 3	protein_coding	protein_coding	0.0686932	1.04877	0.622347	0.796347	Not regulated	33.69	34.09	32.33	40.92	40.56	38.98	31.47
Bop1	<a href='https://www.ncbi.nlm.nih.gov/gene/?term=300050' target="_blank"> 300050 </a>	BOP1 ribosomal biogenesis factor	protein_coding	protein_coding	0.419521	1.33748	1.17481e-06	3.52656e-05	Not regulated	31.16	31.26	29.17	33.38	44.12	39.64	41.61
Bora	<a href='https://www.ncbi.nlm.nih.gov/gene/?term=306102' target="_blank"> 306102 </a>	bora, aurora kinase A activator	protein_coding	protein_coding	0.563025	1.47736	0.0132621	0.0651809	Not regulated	3.46	2.89	3.1	3.05	4.62	6.06	3.25
Borcs5	<a href='https://www.ncbi.nlm.nih.gov/gene/?term=362452' target="_blank"> 362452 </a>	BLOC-1 related complex subunit 5			-0.193823	-1.14379	0.180158	0.384801	Not regulated	14.31	16.77	14.67	14.9	13.57	10.76	15.37
Borcs6	<a href='https://www.ncbi.nlm.nih.gov/gene/?term=497934' target="_blank"> 497934 </a>	BLOC-1 related complex subunit 6			-0.100999	-1.07252	0.215042	0.43071	Not regulated	10.7	10.34	10.72	10.86	9.86	10.19	9.79
Borcs7	<a href='https://www.ncbi.nlm.nih.gov/gene/?term=294012' target="_blank"> 294012 </a>	BLOC-1 related complex subunit 7			0.0923087	1.06607	0.227654	0.445199	Not regulated	24.42	25.05	24.49	26.34	26.59	26.89	25.69
Borcs8	<a href='https://www.ncbi.nlm.nih.gov/gene/?term=688966' target="_blank"> 688966 </a>	BLOC-1 related complex subunit 8			0.088793	1.06348	0.654659	0.81506	Not regulated	33.36	30.98	30.6	35.51	44.14	35.29	24.46
Bpgm	<a href='https://www.ncbi.nlm.nih.gov/gene/?term=296973' target="_blank"> 296973 </a>	bisphosphoglycerate mutase	protein_coding	protein_coding	0.244587	1.18475	0.00960662	0.0513254	Not regulated	24.95	25.79	26.02	28.78	31.88	30.46	31.5
Bphl	<a href='https://www.ncbi.nlm.nih.gov/gene/?term=361239' target="_blank"> 361239 </a>	biphenyl hydrolase like	protein_coding	protein_coding	-0.383814	-1.30479	0.00842988	0.0464762	Not regulated	31.73	29.63	27.28	27.39	17.63	27.71	21.73
Bpifc	<a href='https://www.ncbi.nlm.nih.gov/gene/?term=299685' target="_blank"> 299685 </a>	BPI fold containing family C	protein_coding	protein_coding	-0.0208219	-1.01454	0.859406	0.935493	Not regulated	15.94	13.76	15.5	15.81	14.15	14.33	16.62
Bpnt1	<a href='https://www.ncbi.nlm.nih.gov/gene/?term=64473' target="_blank"> 64473 </a>	3'(2'), 5'-bisphosphate nucleotidase 1	protein_coding	protein_coding	0.130591	1.09474	0.213401	0.428477	Not regulated	27.96	29.23	26.94	34.08	32.71	31.96	32.38
Bptf	<a href='https://www.ncbi.nlm.nih.gov/gene/?term=303617' target="_blank"> 303617 </a>	bromodomain PHD finger transcription factor	protein_coding	protein_coding	-0.0335875	-1.02355	0.618364	0.793879	Not regulated	16.99	18.3	16.18	16.16	16.43	16.2	17.06
Braf	<a href='https://www.ncbi.nlm.nih.gov/gene/?term=114486' target="_blank"> 114486 </a>	B-Raf proto-oncogene, serine/threonine kinase	protein_coding	protein_coding	-0.00300273	-1.00208	0.981402	0.991259	Not regulated	10.98	12.33	10.64	12.48	13.29	9.9	11.97
Brap	<a href='https://www.ncbi.nlm.nih.gov/gene/?term=687346' target="_blank"> 687346 </a>	BRCA1 associated protein	protein_coding	protein_coding	-0.247386	-1.18705	0.0141336	0.0684193	Not regulated	97.98	123.43	123.39	109.88	102.21	95.24	90.37
Brat1	<a href='https://www.ncbi.nlm.nih.gov/gene/?term=498150' target="_blank"> 498150 </a>	BRCA1-associated ATM activator 1	protein_coding	protein_coding	-0.105559	-1.07591	0.285414	0.510344	Not regulated	8.3	8.44	8.27	8.31	7.96	8.05	7.36
Brca1	<a href='https://www.ncbi.nlm.nih.gov/gene/?term=497672' target="_blank"> 497672 </a>	BRCA1, DNA repair associated	protein_coding	protein_coding	0.029967	1.02099	0.878621	0.94452	Not regulated	2.28	2.47	2.28	2.22	1.7	3.12	2.37
Brca2	<a href='https://www.ncbi.nlm.nih.gov/gene/?term=360254' target="_blank"> 360254 </a>	BRCA2, DNA repair associated	protein_coding	protein_coding	-0.0905378	-1.06477	0.490899	0.700126	Not regulated	1.43	1.46	1.51	1.41	1.32	1.52	1.27
Brcc3	<a href='https://www.ncbi.nlm.nih.gov/gene/?term=316794' target="_blank"> 316794 </a>	BRCA1/BRCA2-containing complex, subunit 3	protein_coding	protein_coding	0.204298	1.15213	0.0181218	0.0820031	Not regulated	16.18	16.85	18.05	18.9	20.33	20	20.22
Brd1	<a href='https://www.ncbi.nlm.nih.gov/gene/?term=315210' target="_blank"> 315210 </a>	bromodomain containing 1	protein_coding	protein_coding	-0.21217	-1.15843	0.00942969	0.0505568	Not regulated	48.39	50.68	43.43	44.62	40.82	37.8	42.57
Brd3	<a href='https://www.ncbi.nlm.nih.gov/gene/?term=362092' target="_blank"> 362092 </a>	bromodomain containing 3	protein_coding	protein_coding	-0.0055151	-1.00383	0.93615	0.971433	Not regulated	29.06	29.92	30.91	29.6	30.04	29.76	29.9
Brd4	<a href='https://www.ncbi.nlm.nih.gov/gene/?term=362844' target="_blank"> 362844 </a>	bromodomain containing 4	protein_coding	protein_coding	0.00982019	1.00683	0.871839	0.941966	Not regulated	41.02	44.24	41.69	43.79	43.1	41.3	43.8
Brd7	<a href='https://www.ncbi.nlm.nih.gov/gene/?term=361374' target="_blank"> 361374 </a>	bromodomain containing 7	protein_coding	protein_coding	0.0305323	1.02139	0.716997	0.853964	Not regulated	64.81	73.41	73.64	76.6	76.8	73.08	71.35
Brd8	<a href='https://www.ncbi.nlm.nih.gov/gene/?term=291691' target="_blank"> 291691 </a>	bromodomain containing 8	protein_coding	protein_coding	-0.0289203	-1.02025	0.697707	0.842185	Not regulated	31.15	31.27	29.22	28.69	29.95	31.16	28.15
Brd9	<a href='https://www.ncbi.nlm.nih.gov/gene/?term=308067' target="_blank"> 308067 </a>	bromodomain containing 9	protein_coding	protein_coding	-0.0989506	-1.07099	0.313343	0.538073	Not regulated	21.38	23.04	22.95	21.11	19.56	23.34	19.39
Brf1	<a href='https://www.ncbi.nlm.nih.gov/gene/?term=299347' target="_blank"> 299347 </a>	BRF1, RNA polymerase III transcription initiation factor subunit	protein_coding	protein_coding	0.11569	1.08349	0.274136	0.497575	Not regulated	17.76	19.35	18.31	17.98	22.23	18.52	18.87
Brf2	<a href='https://www.ncbi.nlm.nih.gov/gene/?term=306542' target="_blank"> 306542 </a>	BRF2, RNA polymerase III transcription initiation factor subunit	protein_coding	protein_coding	-0.249417	-1.18873	0.0631708	0.195323	Not regulated	10.9	10.61	11.4	13.43	9.74	10.12	9.51
Bri3	<a href='https://www.ncbi.nlm.nih.gov/gene/?term=304284' target="_blank"> 304284 </a>	brain protein I3	protein_coding	protein_coding	-0.0577123	-1.04081	0.532818	0.73348	Not regulated	114.83	126.26	116.37	134.99	119.64	123.26	112.46
Brinp1	<a href='https://www.ncbi.nlm.nih.gov/gene/?term=140610' target="_blank"> 140610 </a>	BMP/retinoic acid inducible neural specific 1	protein_coding	protein_coding	-0.629797	-1.54735	0.172054	0.373731	Not regulated	1.11	1.17	1.37	0.52	0.54	0.44	1.04
Brip1	<a href='https://www.ncbi.nlm.nih.gov/gene/?term=360588' target="_blank"> 360588 </a>	BRCA1 interacting helicase 1	protein_coding	protein_coding	0.829171	1.77666	0.00185586	0.0145772	Up in F_UVB_WT_MG	1.01	0.87	1.16	0.94	1.23	2.16	1.94
Brix1	<a href='https://www.ncbi.nlm.nih.gov/gene/?term=294799' target="_blank"> 294799 </a>	biogenesis of ribosomes BRX1	protein_coding	protein_coding	0.186485	1.13799	0.0202791	0.0888728	Not regulated	29.02	33.96	31.43	32.83	37.46	38.02	37.38
Brk1	<a href='https://www.ncbi.nlm.nih.gov/gene/?term=679934' target="_blank"> 679934 </a>	BRICK1 subunit of SCAR/WAVE actin nucleating complex	protein_coding	protein_coding	-0.0953117	-1.0683	0.30536	0.529589	Not regulated	206.72	203.85	234.24	213.45	213.73	205.75	183.9
Brms1l	<a href='https://www.ncbi.nlm.nih.gov/gene/?term=299053' target="_blank"> 299053 </a>	BRMS1 like transcriptional repressor	protein_coding	protein_coding	0.0772339	1.05499	0.451093	0.66691	Not regulated	12.29	13.66	12.28	12.37	13.75	12.18	13.79
Brox	<a href='https://www.ncbi.nlm.nih.gov/gene/?term=305031' target="_blank"> 305031 </a>	BRO1 domain and CAAX motif containing	protein_coding	protein_coding	-0.083178	-1.05935	0.180716	0.385246	Not regulated	34.56	36.03	33.7	33.82	31.25	33.87	32.99
Brpf1	<a href='https://www.ncbi.nlm.nih.gov/gene/?term=679713' target="_blank"> 679713 </a>	bromodomain and PHD finger containing, 1	protein_coding	protein_coding	0.075655	1.05384	0.388045	0.609595	Not regulated	12.46	13.63	12.19	13.34	13.83	12.7	14.26
Brpf3	<a href='https://www.ncbi.nlm.nih.gov/gene/?term=309647' target="_blank"> 309647 </a>	bromodomain and PHD finger containing, 3	protein_coding	protein_coding	0.0993918	1.07132	0.383383	0.605275	Not regulated	12.25	12.07	11.57	11.78	14.6	11.22	13.74
Brsk1	<a href='https://www.ncbi.nlm.nih.gov/gene/?term=499073' target="_blank"> 499073 </a>	BR serine/threonine kinase 1	protein_coding	protein_coding	0.210787	1.15732	0.410066	0.629683	Not regulated	1.94	1.78	2.01	1.21	1.57	1.89	2.11
Brsk2	<a href='https://www.ncbi.nlm.nih.gov/gene/?term=293631' target="_blank"> 293631 </a>	BR serine/threonine kinase 2	protein_coding	protein_coding	-0.0633432	-1.04488	0.888708	0.949677	Not regulated	0.22	0.48	0.51	0.78	0.52	0.43	0.53
Brwd1	<a href='https://www.ncbi.nlm.nih.gov/gene/?term=304061' target="_blank"> 304061 </a>	bromodomain and WD repeat domain containing 1	protein_coding	protein_coding	-0.208359	-1.15537	0.0014084	0.0117275	Not regulated	12	12.89	11.69	12.56	10.58	10.89	10.55
Brwd3	<a href='https://www.ncbi.nlm.nih.gov/gene/?term=317213' target="_blank"> 317213 </a>	bromodomain and WD repeat domain containing 3	protein_coding	protein_coding	0.0725013	1.05154	0.485956	0.695763	Not regulated	7.23	8.99	7.89	9.17	7.92	8.39	9.21
Bscl2	<a href='https://www.ncbi.nlm.nih.gov/gene/?term=361722' target="_blank"> 361722 </a>	BSCL2 lipid droplet biogenesis associated, seipin	protein_coding	protein_coding	0.197321	1.14657	0.019069	0.0850652	Not regulated	279.84	293.89	252.99	291.62	343.98	308.14	308.28
Bsdc1	<a href='https://www.ncbi.nlm.nih.gov/gene/?term=297890' target="_blank"> 297890 </a>	BSD domain containing 1	protein_coding	protein_coding	-0.111342	-1.08023	0.089291	0.245379	Not regulated	66.29	65.83	66.81	68.6	64.36	61.44	60.16
Bsg	<a href='https://www.ncbi.nlm.nih.gov/gene/?term=25246' target="_blank"> 25246 </a>	basigin (Ok blood group)	protein_coding	protein_coding	0.140102	1.10198	0.00995052	0.052781	Not regulated	420.94	435.12	404.27	412.12	473.76	461.72	448.45
Bsn	<a href='https://www.ncbi.nlm.nih.gov/gene/?term=29138' target="_blank"> 29138 </a>	bassoon (presynaptic cytomatrix protein)	protein_coding	protein_coding	-3.86421	-14.5628	1.81342e-18	6.69856e-16	Down in F_UVB_WT_MG	0.38	0.62	0.45	0.42	0.03	0.05	0.01
Bspry	<a href='https://www.ncbi.nlm.nih.gov/gene/?term=64027' target="_blank"> 64027 </a>	B-box and SPRY domain containing	protein_coding	protein_coding	-0.10735	-1.07725	0.156346	0.351375	Not regulated	167.03	181.96	154.41	165.17	159.74	146.6	159.27
Bst1	<a href='https://www.ncbi.nlm.nih.gov/gene/?term=81506' target="_blank"> 81506 </a>	bone marrow stromal cell antigen 1	protein_coding	protein_coding	1.39055	2.62178	2.75322e-05	0.000499485	Up in F_UVB_WT_MG	1.91	1.23	1.78	1.23	2.77	5.49	3.92
Bst2	<a href='https://www.ncbi.nlm.nih.gov/gene/?term=378947' target="_blank"> 378947 </a>	bone marrow stromal cell antigen 2	protein_coding	protein_coding	0.0102764	1.00715	0.954451	0.979629	Not regulated	40.23	39.13	48.71	37.01	35.02	36.16	53.37
Btaf1	<a href='https://www.ncbi.nlm.nih.gov/gene/?term=368042' target="_blank"> 368042 </a>	B-TFIID TATA-box binding protein associated factor 1	protein_coding	protein_coding	0.00799717	1.00556	0.924824	0.965673	Not regulated	11.67	13.33	11.97	13.86	12.51	12.73	12.81
Btbd1	<a href='https://www.ncbi.nlm.nih.gov/gene/?term=293060' target="_blank"> 293060 </a>	BTB domain containing 1	protein_coding	protein_coding	0.0437326	1.03078	0.639125	0.806259	Not regulated	38.47	36.41	37.01	31.18	34.61	39.39	36.87
Btbd10	<a href='https://www.ncbi.nlm.nih.gov/gene/?term=308890' target="_blank"> 308890 </a>	BTB domain containing 10	protein_coding	protein_coding	0.0477213	1.03363	0.556981	0.751495	Not regulated	23.02	23.04	22.66	23.32	24.86	22.2	23.82
Btbd11	<a href='https://www.ncbi.nlm.nih.gov/gene/?term=314675' target="_blank"> 314675 </a>	BTB domain containing 11	protein_coding	protein_coding	-0.187237	-1.13858	0.0449861	0.155383	Not regulated	9.88	10.37	10.98	9.23	8.98	9.06	8.72
Btbd19	<a href='https://www.ncbi.nlm.nih.gov/gene/?term=100361234' target="_blank"> 100361234 </a>	BTB domain containing 19	protein_coding	protein_coding	0.0502264	1.03543	0.668005	0.823391	Not regulated	8.57	8.11	7.71	7.78	8.1	8.75	8.68
Btbd2	<a href='https://www.ncbi.nlm.nih.gov/gene/?term=500793' target="_blank"> 500793 </a>	BTB domain containing 2	protein_coding	protein_coding	-0.06688	-1.04745	0.405979	0.625864	Not regulated	21.61	21.52	20.06	20.04	20.22	20.93	18.58
Btbd3	<a href='https://www.ncbi.nlm.nih.gov/gene/?term=311462' target="_blank"> 311462 </a>	BTB domain containing 3	protein_coding	protein_coding	-0.247509	-1.18716	0.044821	0.155095	Not regulated	28.45	26.64	24.7	27.06	20.91	19.86	26.19
Btbd6	<a href='https://www.ncbi.nlm.nih.gov/gene/?term=690367' target="_blank"> 690367 </a>	BTB domain containing 6	protein_coding	protein_coding	0.0486134	1.03427	0.608153	0.78679	Not regulated	26.68	27.55	25.93	26.61	30.51	26.99	25.74
Btbd7	<a href='https://www.ncbi.nlm.nih.gov/gene/?term=362772' target="_blank"> 362772 </a>	BTB domain containing 7	protein_coding	protein_coding	-0.150136	-1.10967	0.102461	0.267898	Not regulated	15.37	17.96	16.98	14.67	14.11	14.6	15.29
Btbd8	<a href='https://www.ncbi.nlm.nih.gov/gene/?term=100364240' target="_blank"> 100364240 </a>	BTB domain containing 8	protein_coding	protein_coding	-0.201081	-1.14956	0.140405	0.328428	Not regulated	2.47	2.37	2.75	2.61	2.16	2.24	2.25
Btbd9	<a href='https://www.ncbi.nlm.nih.gov/gene/?term=294318' target="_blank"> 294318 </a>	BTB domain containing 9	protein_coding	protein_coding	-0.165795	-1.12178	0.100783	0.265178	Not regulated	18.13	19.32	17.1	19.09	17.69	15.98	15.58
Btd	<a href='https://www.ncbi.nlm.nih.gov/gene/?term=306262' target="_blank"> 306262 </a>	biotinidase	protein_coding	protein_coding	0.17918	1.13224	0.139408	0.327208	Not regulated	49.82	41.78	43.74	54.42	57.7	52.61	51.04
Btf3	<a href='https://www.ncbi.nlm.nih.gov/gene/?term=294680' target="_blank"> 294680 </a>	basic transcription factor 3	protein_coding	protein_coding	0.0593585	1.042	0.268719	0.49219	Not regulated	404.07	388.15	400.64	384.4	409.08	399.3	421.95
Btf3l4	<a href='https://www.ncbi.nlm.nih.gov/gene/?term=366434' target="_blank"> 366434 </a>	basic transcription factor 3-like 4	protein_coding	protein_coding	-0.199468	-1.14828	0.0320336	0.122903	Not regulated	29.54	28.14	27.34	31.83	26.32	24.89	25.11
Btg1	<a href='https://www.ncbi.nlm.nih.gov/gene/?term=29618' target="_blank"> 29618 </a>	BTG anti-proliferation factor 1	protein_coding	protein_coding	-0.154175	-1.11279	0.149015	0.341595	Not regulated	223.24	216.11	234.42	208.47	183.89	179.24	232.36
Btg2	<a href='https://www.ncbi.nlm.nih.gov/gene/?term=29619' target="_blank"> 29619 </a>	BTG anti-proliferation factor 2	protein_coding	protein_coding	-0.201352	-1.14978	0.171794	0.373469	Not regulated	97.5	116.41	100.84	148.51	98.92	94.58	109.09
Btg3	<a href='https://www.ncbi.nlm.nih.gov/gene/?term=54230' target="_blank"> 54230 </a>	BTG anti-proliferation factor 3	protein_coding	protein_coding	0.498398	1.41264	0.000130949	0.00176788	Not regulated	14.33	15.22	14.31	15.18	17.56	22.55	22.68
Btk	<a href='https://www.ncbi.nlm.nih.gov/gene/?term=367901' target="_blank"> 367901 </a>	Bruton tyrosine kinase	protein_coding	protein_coding	0.318007	1.24661	0.441329	0.660082	Not regulated	1.35	0.8	0.68	0.73	0.98	1.51	0.74
Btn2a2	<a href='https://www.ncbi.nlm.nih.gov/gene/?term=306957' target="_blank"> 306957 </a>	butyrophilin, subfamily 2, member A2	protein_coding	protein_coding	0.611523	1.52787	0.0359956	0.13326	Not regulated	1.21	1.31	0.81	1.23	1.62	2.05	1.51
Btnl9	<a href='https://www.ncbi.nlm.nih.gov/gene/?term=684480' target="_blank"> 684480 </a>	butyrophilin-like 9			-0.102599	-1.07371	0.835743	0.922529	Not regulated	0.41	0.76	1.28	0.76	0.56	0.75	0.94
Btrc	<a href='https://www.ncbi.nlm.nih.gov/gene/?term=361765' target="_blank"> 361765 </a>	beta-transducin repeat containing E3 ubiquitin protein ligase	protein_coding	protein_coding	-0.142515	-1.10383	0.219441	0.436051	Not regulated	8.07	8.16	8.14	7.58	7.47	7.36	7.14
Bub1	<a href='https://www.ncbi.nlm.nih.gov/gene/?term=296137' target="_blank"> 296137 </a>	BUB1 mitotic checkpoint serine/threonine kinase	protein_coding	protein_coding	0.835752	1.78479	7.32675e-07	2.36483e-05	Up in F_UVB_WT_MG	6.29	8.91	7.32	7.8	13.79	16.46	10.39
Bub1b	<a href='https://www.ncbi.nlm.nih.gov/gene/?term=171576' target="_blank"> 171576 </a>	BUB1 mitotic checkpoint serine/threonine kinase B	protein_coding	protein_coding	0.59159	1.50691	0.00385085	0.0258663	Up in F_UVB_WT_MG	4.87	4.29	5.66	4.47	6.03	10.03	5.88
Bub3	<a href='https://www.ncbi.nlm.nih.gov/gene/?term=361662' target="_blank"> 361662 </a>	BUB3 mitotic checkpoint protein			0.080158	1.05713	0.275967	0.499769	Not regulated	56.38	55.9	56.49	53.94	59.33	61.01	56.12
Bud13	<a href='https://www.ncbi.nlm.nih.gov/gene/?term=300687' target="_blank"> 300687 </a>	BUD13 homolog	protein_coding	protein_coding	0.00711925	1.00495	0.951631	0.978864	Not regulated	11.17	12.83	10.78	10.24	10.8	11.96	11.3
Bud23	<a href='https://www.ncbi.nlm.nih.gov/gene/?term=368084' target="_blank"> 368084 </a>	BUD23, rRNA methyltransferase and ribosome maturation factor			0.20036	1.14899	0.135157	0.320664	Not regulated	39.21	38.12	36.48	45.85	52.48	44.76	40.36
Bud31	<a href='https://www.ncbi.nlm.nih.gov/gene/?term=89819' target="_blank"> 89819 </a>	BUD31 homolog	protein_coding	protein_coding	0.0246576	1.01724	0.776087	0.88649	Not regulated	77.74	82.29	76.82	86.92	83.52	78.55	82.87
Bves	<a href='https://www.ncbi.nlm.nih.gov/gene/?term=365603' target="_blank"> 365603 </a>	blood vessel epicardial substance	processed_transcript	processed_transcript	-0.573091	-1.48771	0.0420199	0.148139	Not regulated	4.52	4.86	4.17	3.54	2.7	4.06	1.95
Bysl	<a href='https://www.ncbi.nlm.nih.gov/gene/?term=359727' target="_blank"> 359727 </a>	bystin-like	protein_coding	protein_coding	0.320902	1.24911	0.0265507	0.107677	Not regulated	10.43	13.27	12.09	15.92	16.95	15.46	16.08
Bzw1	<a href='https://www.ncbi.nlm.nih.gov/gene/?term=363232' target="_blank"> 363232 </a>	basic leucine zipper and W2 domains 1	protein_coding	protein_coding	0.194	1.14393	0.0638084	0.196645	Not regulated	94.53	96.67	103.13	117.49	114.82	110.39	128.73
Bzw2	<a href='https://www.ncbi.nlm.nih.gov/gene/?term=171439' target="_blank"> 171439 </a>	basic leucine zipper and W2 domains 2	protein_coding	protein_coding	0.123231	1.08917	0.127772	0.310283	Not regulated	50.91	52.15	50.88	55.43	59.69	58.49	53.2
C1d	<a href='https://www.ncbi.nlm.nih.gov/gene/?term=289810' target="_blank"> 289810 </a>	C1D nuclear receptor corepressor	protein_coding	protein_coding	0.253763	1.19231	0.00972661	0.0518623	Not regulated	26.27	25.49	24.84	26.33	30.81	31.99	28.73
C1galt1	<a href='https://www.ncbi.nlm.nih.gov/gene/?term=65044' target="_blank"> 65044 </a>	core 1 synthase, glycoprotein-N-acetylgalactosamine 3-beta-galactosyltransferase, 1	protein_coding	protein_coding	0.000517722	1.00036	0.997507	0.999004	Not regulated	9.22	12.02	13.05	11.84	9.93	13.06	11.83
C1qa	<a href='https://www.ncbi.nlm.nih.gov/gene/?term=298566' target="_blank"> 298566 </a>	complement C1q A chain	protein_coding	protein_coding	0.8497	1.80213	0.00267232	0.019387	Up in F_UVB_WT_MG	38.34	27.65	18.18	19.02	30.59	47.95	62.55
C1qb	<a href='https://www.ncbi.nlm.nih.gov/gene/?term=29687' target="_blank"> 29687 </a>	complement C1q B chain	protein_coding	protein_coding	1.29797	2.45883	3.05002e-09	2.19238e-07	Up in F_UVB_WT_MG	21.7	17.83	12.29	14.32	30.72	41.11	50.37
C1qbp	<a href='https://www.ncbi.nlm.nih.gov/gene/?term=29681' target="_blank"> 29681 </a>	complement C1q binding protein	protein_coding	protein_coding	0.381487	1.30268	2.74564e-09	1.99516e-07	Not regulated	173.62	186.82	176.75	184.04	242.68	235.65	227.02
C1qc	<a href='https://www.ncbi.nlm.nih.gov/gene/?term=362634' target="_blank"> 362634 </a>	complement C1q C chain	protein_coding	protein_coding	0.936385	1.91373	6.90924e-05	0.00105605	Up in F_UVB_WT_MG	25.94	23.14	13.46	15.78	28.77	37.56	47.95
C1ql3	<a href='https://www.ncbi.nlm.nih.gov/gene/?term=680404' target="_blank"> 680404 </a>	complement C1q like 3	protein_coding	protein_coding	-0.476342	-1.39121	0.173637	0.376064	Not regulated	0.76	1.11	1.13	0.93	0.41	0.79	0.93
C1ql4	<a href='https://www.ncbi.nlm.nih.gov/gene/?term=300220' target="_blank"> 300220 </a>	complement C1q like 4	protein_coding	protein_coding	0.560498	1.47478	0.256554	0.479636	Not regulated	0.94	2.27	1.32	3.38	3.38	2.05	3.29
C1qtnf1	<a href='https://www.ncbi.nlm.nih.gov/gene/?term=303701' target="_blank"> 303701 </a>	C1q and TNF related 1	protein_coding	protein_coding	0.152617	1.11158	0.242837	0.463705	Not regulated	13.56	12.55	10.82	11.32	11.31	14.47	14.55
C1qtnf12	<a href='https://www.ncbi.nlm.nih.gov/gene/?term=313774' target="_blank"> 313774 </a>	C1q and TNF related 12			0.463468	1.37885	0.00951126	0.0508531	Not regulated	29.27	28.4	37.83	25.78	32.34	50.92	42.83
C1qtnf2	<a href='https://www.ncbi.nlm.nih.gov/gene/?term=497886' target="_blank"> 497886 </a>	C1q and TNF related 2	protein_coding	protein_coding	-0.49481	-1.40914	0.0159036	0.0743359	Not regulated	6.57	7.55	7.61	5.94	3.92	6.05	4.89
C1qtnf3	<a href='https://www.ncbi.nlm.nih.gov/gene/?term=294806' target="_blank"> 294806 </a>	C1q and TNF related 3	protein_coding	protein_coding	-0.606656	-1.52273	0.252857	0.475735	Not regulated	1.17	0.79	0.42	0.5	0.55	0.52	0.35
C1qtnf5	<a href='https://www.ncbi.nlm.nih.gov/gene/?term=315598' target="_blank"> 315598 </a>	C1q and TNF related 5	protein_coding	protein_coding	1.5526	2.93345	4.86986e-14	9.96298e-12	Up in F_UVB_WT_MG	5.07	4.98	3.73	4.96	10.77	17.05	13.61
C1qtnf6	<a href='https://www.ncbi.nlm.nih.gov/gene/?term=315114' target="_blank"> 315114 </a>	C1q and TNF related 6	protein_coding	protein_coding	0.0799232	1.05696	0.709513	0.848806	Not regulated	5.55	7.1	4.31	3.9	4.6	5.58	4.8
C1qtnf7	<a href='https://www.ncbi.nlm.nih.gov/gene/?term=305423' target="_blank"> 305423 </a>	C1q and TNF related 7	protein_coding	protein_coding	-0.104735	-1.0753	0.688034	0.836331	Not regulated	2.46	2.05	2.06	2.09	2.1	1.79	2.13
C1qtnf9	<a href='https://www.ncbi.nlm.nih.gov/gene/?term=364395' target="_blank"> 364395 </a>	C1q and TNF related 9	protein_coding	protein_coding	-0.169293	-1.12451	0.381611	0.604199	Not regulated	6.67	6.09	4.64	5.65	5.2	4.41	4.9
C1r	<a href='https://www.ncbi.nlm.nih.gov/gene/?term=312705' target="_blank"> 312705 </a>	complement C1r	protein_coding	protein_coding	0.72623	1.65431	4.88924e-08	2.50066e-06	Up in F_UVB_WT_MG	40.3	44.33	35.91	33.22	52.62	74.97	63.59
C1rl	<a href='https://www.ncbi.nlm.nih.gov/gene/?term=408246' target="_blank"> 408246 </a>	complement C1r subcomponent like	protein_coding	protein_coding	0.471199	1.38626	0.158971	0.355114	Not regulated	0.86	1.02	1.04	1.17	0.91	1.62	1.76
C1s	<a href='https://www.ncbi.nlm.nih.gov/gene/?term=192262' target="_blank"> 192262 </a>	complement C1s	protein_coding	protein_coding	0.696687	1.62078	3.60524e-06	9.29117e-05	Up in F_UVB_WT_MG	57.07	46.02	42.65	41.01	63.58	93.14	70.69
C2	<a href='https://www.ncbi.nlm.nih.gov/gene/?term=24231' target="_blank"> 24231 </a>	complement C2	nonsense_mediated_decay	protein_coding	0.990517	1.9869	2.84836e-05	0.000514639	Up in F_UVB_WT_MG	33.15	28.48	18.53	19.87	45.32	67.58	35.52
C2cd2	<a href='https://www.ncbi.nlm.nih.gov/gene/?term=304055' target="_blank"> 304055 </a>	C2 calcium-dependent domain containing 2	protein_coding	protein_coding	-0.314063	-1.2432	0.0843412	0.236219	Not regulated	26.55	38.32	45.38	41.16	36.05	30.22	26
C2cd2l	<a href='https://www.ncbi.nlm.nih.gov/gene/?term=300666' target="_blank"> 300666 </a>	C2CD2-like	protein_coding	protein_coding	0.158125	1.11584	0.147485	0.339611	Not regulated	10.99	13.71	12.35	12.85	14.99	13.55	13.19
C2cd3	<a href='https://www.ncbi.nlm.nih.gov/gene/?term=293148' target="_blank"> 293148 </a>	C2 domain containing 3 centriole elongation regulator	protein_coding	protein_coding	0.0543092	1.03836	0.650837	0.812507	Not regulated	5.25	5.32	4.59	4.65	4.76	6.02	4.69
C2cd4a	<a href='https://www.ncbi.nlm.nih.gov/gene/?term=691703' target="_blank"> 691703 </a>	C2 calcium-dependent domain containing 4A	protein_coding	protein_coding	2.03021	4.08464	0.0327172	0.124842	Not regulated	0.11	0.14	0	0.16	0.82	0.36	0.1
C2cd4c	<a href='https://www.ncbi.nlm.nih.gov/gene/?term=500798' target="_blank"> 500798 </a>	C2 calcium-dependent domain containing 4C	protein_coding	protein_coding	-0.072731	-1.05171	0.761688	0.878408	Not regulated	4.49	3.81	2.68	5.41	3.94	3.49	4.24
C2cd4d	<a href='https://www.ncbi.nlm.nih.gov/gene/?term=100363111' target="_blank"> 100363111 </a>	C2 calcium-dependent domain containing 4D	protein_coding	protein_coding	-0.372194	-1.29432	0.28707	0.512387	Not regulated	0.54	0.72	0.86	0.84	0.4	0.55	0.76
C2cd5	<a href='https://www.ncbi.nlm.nih.gov/gene/?term=362461' target="_blank"> 362461 </a>	C2 calcium-dependent domain containing 5	protein_coding	protein_coding	-0.158344	-1.11601	0.156901	0.352176	Not regulated	11.04	10.02	10.12	9.83	8.18	10.61	8.83
C3	<a href='https://www.ncbi.nlm.nih.gov/gene/?term=24232' target="_blank"> 24232 </a>	complement C3	protein_coding	protein_coding	0.184848	1.1367	0.52987	0.731897	Not regulated	1.49	1.34	0.91	0.68	1.35	1.37	1.06
C3ar1	<a href='https://www.ncbi.nlm.nih.gov/gene/?term=84007' target="_blank"> 84007 </a>	complement C3a receptor 1	protein_coding	protein_coding	0.943013	1.92254	0.0201368	0.088493	Not regulated	0.71	0.43	0.48	0.37	0.52	1.08	1.25
C5ar2	<a href='https://www.ncbi.nlm.nih.gov/gene/?term=445269' target="_blank"> 445269 </a>	complement C5a receptor 2	protein_coding	protein_coding	0.298284	1.22968	0.314636	0.539357	Not regulated	2.36	2.56	3.83	1.98	2.41	4.24	4.06
C6	<a href='https://www.ncbi.nlm.nih.gov/gene/?term=24237' target="_blank"> 24237 </a>	complement C6	protein_coding	protein_coding	0.834913	1.78375	0.140242	0.328334	Not regulated	0.28	0.68	0.12	0.31	0.74	0.48	0.64
C7	<a href='https://www.ncbi.nlm.nih.gov/gene/?term=117517' target="_blank"> 117517 </a>	complement C7	protein_coding	protein_coding	0.301369	1.23231	0.517806	0.722266	Not regulated	7.16	9.26	10.72	4.52	5.65	15.87	7.93
C8g	<a href='https://www.ncbi.nlm.nih.gov/gene/?term=296545' target="_blank"> 296545 </a>	complement C8 gamma chain	protein_coding	protein_coding	-0.475123	-1.39004	0.00678883	0.0394054	Not regulated	5.58	6.13	6.48	6.28	3.85	5.1	4.58
Ca11	<a href='https://www.ncbi.nlm.nih.gov/gene/?term=308588' target="_blank"> 308588 </a>	carbonic anhydrase 11			-0.474579	-1.38951	0.00156763	0.0127907	Not regulated	18.15	17.29	19.23	16.63	12.03	15.61	11.07
Ca12	<a href='https://www.ncbi.nlm.nih.gov/gene/?term=363085' target="_blank"> 363085 </a>	carbonic anhydrase 12			0.582554	1.4975	4.10379e-06	0.000103947	Up in F_UVB_WT_MG	46.91	39.82	36.16	36.05	60.01	51.71	66.09
Ca13	<a href='https://www.ncbi.nlm.nih.gov/gene/?term=499566' target="_blank"> 499566 </a>	carbonic anhydrase 13			-0.125994	-1.09126	0.345968	0.5713	Not regulated	61.75	56.55	67.55	56.03	46.62	53.33	66.66
Ca14	<a href='https://www.ncbi.nlm.nih.gov/gene/?term=791259' target="_blank"> 791259 </a>	carbonic anhydrase 14			5.43639e-05	1.00004	0.999522	0.999597	Not regulated	18.04	18.87	18.82	18.25	18	18.31	19.62
Ca3	<a href='https://www.ncbi.nlm.nih.gov/gene/?term=54232' target="_blank"> 54232 </a>	carbonic anhydrase 3			-1.61959	-3.07288	1.49297e-06	4.33483e-05	Down in F_UVB_WT_MG	9.14	25.35	9.6	15.52	5.65	3.41	5.25
Ca5b	<a href='https://www.ncbi.nlm.nih.gov/gene/?term=302669' target="_blank"> 302669 </a>	carbonic anhydrase 5B			0.229409	1.17235	0.0712058	0.211988	Not regulated	169.63	208.34	176.99	217.22	260.54	201.21	216.79
Ca6	<a href='https://www.ncbi.nlm.nih.gov/gene/?term=298657' target="_blank"> 298657 </a>	carbonic anhydrase 6			-0.981296	-1.97424	0.0327049	0.124842	Not regulated	7.67	10.59	8.64	9.88	1.34	3.67	9.01
Caap1	<a href='https://www.ncbi.nlm.nih.gov/gene/?term=500501' target="_blank"> 500501 </a>	caspase activity and apoptosis inhibitor 1	protein_coding	protein_coding	-0.0581863	-1.04116	0.671767	0.824472	Not regulated	9.18	8.07	9.31	9.05	8.19	8.56	8.9
Cab39	<a href='https://www.ncbi.nlm.nih.gov/gene/?term=301574' target="_blank"> 301574 </a>	calcium binding protein 39	protein_coding	protein_coding	0.0513971	1.03627	0.511759	0.71779	Not regulated	88.55	95.92	91.1	100.37	99.26	90.81	101.93
Cab39l	<a href='https://www.ncbi.nlm.nih.gov/gene/?term=290291' target="_blank"> 290291 </a>	calcium binding protein 39-like	protein_coding	protein_coding	0.0123461	1.00859	0.875018	0.943331	Not regulated	28.51	30.31	28.15	27.48	26.67	30.76	30.81
Cabcoco1	<a href='https://www.ncbi.nlm.nih.gov/gene/?term=361834' target="_blank"> 361834 </a>	ciliary associated calcium binding coiled-coil 1			-0.0671783	-1.04767	0.737126	0.865013	Not regulated	10.73	10.46	8.35	8.1	9.08	10.7	7.11
Cabin1	<a href='https://www.ncbi.nlm.nih.gov/gene/?term=94165' target="_blank"> 94165 </a>	calcineurin binding protein 1	protein_coding	protein_coding	-0.083267	-1.05941	0.354867	0.578666	Not regulated	20.13	18.07	20.35	19.89	17.08	19.56	17.33
Cables1	<a href='https://www.ncbi.nlm.nih.gov/gene/?term=307585' target="_blank"> 307585 </a>	Cdk5 and Abl enzyme substrate 1	protein_coding	protein_coding	0.085895	1.06135	0.47782	0.687668	Not regulated	10.64	13.55	11.08	12.28	13.75	11.2	12.78
Cables2	<a href='https://www.ncbi.nlm.nih.gov/gene/?term=311703' target="_blank"> 311703 </a>	Cdk5 and Abl enzyme substrate 2	protein_coding	protein_coding	0.151252	1.11053	0.161866	0.359889	Not regulated	9.04	8.89	8.04	8.91	9.13	10.13	9.95
Cabp7	<a href='https://www.ncbi.nlm.nih.gov/gene/?term=360970' target="_blank"> 360970 </a>	calcium binding protein 7	protein_coding	protein_coding	-1.4107	-2.65866	0.0142954	0.068977	Not regulated	0.41	1.69	0.98	1.92	0.23	0.37	0.82
Cachd1	<a href='https://www.ncbi.nlm.nih.gov/gene/?term=298267' target="_blank"> 298267 </a>	cache domain containing 1	protein_coding	protein_coding	-0.255386	-1.19365	0.00920921	0.0496207	Not regulated	38.36	32.23	36.87	31.38	28.15	28.79	30.46
Cacna1a	<a href='https://www.ncbi.nlm.nih.gov/gene/?term=25398' target="_blank"> 25398 </a>	calcium voltage-gated channel subunit alpha1 A	protein_coding	protein_coding	0.138591	1.10083	0.501154	0.709447	Not regulated	0.65	0.79	0.91	0.54	0.76	0.9	0.95
Cacna1b	<a href='https://www.ncbi.nlm.nih.gov/gene/?term=257648' target="_blank"> 257648 </a>	calcium voltage-gated channel subunit alpha1 B	protein_coding	protein_coding	0.699937	1.62443	0.00127049	0.0107817	Up in F_UVB_WT_MG	0.52	0.43	0.45	0.4	0.72	0.86	0.62
Cacna1c	<a href='https://www.ncbi.nlm.nih.gov/gene/?term=24239' target="_blank"> 24239 </a>	calcium voltage-gated channel subunit alpha1 C	protein_coding	protein_coding	-0.0492884	-1.03475	0.812232	0.908187	Not regulated	1.3	1.69	1.1	1.16	1.08	1.56	1.21
Cacna1d	<a href='https://www.ncbi.nlm.nih.gov/gene/?term=29716' target="_blank"> 29716 </a>	calcium voltage-gated channel subunit alpha1 D	protein_coding	protein_coding	-0.929629	-1.90479	0.027188	0.109294	Not regulated	1.34	0.96	1.4	0.36	0.37	0.64	0.58
Cacna1e	<a href='https://www.ncbi.nlm.nih.gov/gene/?term=54234' target="_blank"> 54234 </a>	calcium voltage-gated channel subunit alpha1 E	protein_coding	protein_coding	-0.99688	-1.99568	0.000608491	0.00607486	Down in F_UVB_WT_MG	6.99	2.99	4.71	8.11	2.43	3.37	2.83
Cacna1g	<a href='https://www.ncbi.nlm.nih.gov/gene/?term=29717' target="_blank"> 29717 </a>	calcium voltage-gated channel subunit alpha1 G	protein_coding	protein_coding	-0.208115	-1.15518	0.376006	0.598316	Not regulated	2.12	3.15	3.25	2.31	1.74	3.21	2.12
Cacna1h	<a href='https://www.ncbi.nlm.nih.gov/gene/?term=114862' target="_blank"> 114862 </a>	calcium voltage-gated channel subunit alpha1 H	protein_coding	protein_coding	-0.244769	-1.1849	0.279288	0.503442	Not regulated	0.76	1.01	0.89	0.74	0.76	0.85	0.55
Cacna1s	<a href='https://www.ncbi.nlm.nih.gov/gene/?term=682930' target="_blank"> 682930 </a>	calcium voltage-gated channel subunit alpha1 S	protein_coding	protein_coding	-0.404107	-1.32327	0.0703748	0.210212	Not regulated	5.56	7.86	7.05	5.99	5.99	5.94	3.1
Cacna2d1	<a href='https://www.ncbi.nlm.nih.gov/gene/?term=25399' target="_blank"> 25399 </a>	calcium voltage-gated channel auxiliary subunit alpha2delta 1	protein_coding	protein_coding	0.0766262	1.05455	0.72889	0.860372	Not regulated	4.13	5.88	5.01	6.05	5.18	8.17	4.02
Cacna2d2	<a href='https://www.ncbi.nlm.nih.gov/gene/?term=300992' target="_blank"> 300992 </a>	calcium voltage-gated channel auxiliary subunit alpha2delta 2	protein_coding	protein_coding	0.201489	1.14988	0.291963	0.516684	Not regulated	1.52	1.35	1.62	1.76	2.04	1.61	1.72
Cacnb1	<a href='https://www.ncbi.nlm.nih.gov/gene/?term=50688' target="_blank"> 50688 </a>	calcium voltage-gated channel auxiliary subunit beta 1	protein_coding	protein_coding	0.199142	1.14802	0.38926	0.610566	Not regulated	2.77	4.63	3.87	3.27	4.63	4.78	3.01
Cacnb2	<a href='https://www.ncbi.nlm.nih.gov/gene/?term=116600' target="_blank"> 116600 </a>	calcium voltage-gated channel auxiliary subunit beta 2	protein_coding	protein_coding	-0.0603418	-1.04271	0.846699	0.928381	Not regulated	0.59	0.73	0.94	0.88	0.59	0.65	0.88
Cacnb3	<a href='https://www.ncbi.nlm.nih.gov/gene/?term=25297' target="_blank"> 25297 </a>	calcium voltage-gated channel auxiliary subunit beta 3	protein_coding	protein_coding	-0.241745	-1.18242	0.0126348	0.0629989	Not regulated	16.74	15.95	17.5	15.59	14.16	13.35	14.14
Cacnb4	<a href='https://www.ncbi.nlm.nih.gov/gene/?term=58942' target="_blank"> 58942 </a>	calcium voltage-gated channel auxiliary subunit beta 4	protein_coding	protein_coding	-0.917023	-1.88821	0.0869523	0.241095	Not regulated	0.27	0.37	0.31	0.25	0.22	0.04	0.23
Cacng1	<a href='https://www.ncbi.nlm.nih.gov/gene/?term=29658' target="_blank"> 29658 </a>	calcium voltage-gated channel auxiliary subunit gamma 1	protein_coding	protein_coding	0.0476352	1.03357	0.892367	0.950213	Not regulated	6.93	8.57	7.42	5.89	8.37	10.89	3.18
Cacng7	<a href='https://www.ncbi.nlm.nih.gov/gene/?term=140728' target="_blank"> 140728 </a>	calcium voltage-gated channel auxiliary subunit gamma 7	protein_coding	protein_coding	-0.556673	-1.47087	0.110495	0.281386	Not regulated	1.05	0.99	1.16	1.41	0.63	1.02	0.73
Cactin	<a href='https://www.ncbi.nlm.nih.gov/gene/?term=500790' target="_blank"> 500790 </a>	cactin, spliceosome C complex subunit	protein_coding	protein_coding	0.176655	1.13026	0.0364005	0.13421	Not regulated	13.16	13.39	12.93	14.2	14.69	15.51	15.31
Cacul1	<a href='https://www.ncbi.nlm.nih.gov/gene/?term=365493' target="_blank"> 365493 </a>	CDK2-associated, cullin domain 1	protein_coding	protein_coding	0.140443	1.10224	0.0471306	0.160374	Not regulated	24.74	25.99	25.58	27.37	28.38	28.51	28.83
Cacybp	<a href='https://www.ncbi.nlm.nih.gov/gene/?term=289144' target="_blank"> 289144 </a>	calcyclin binding protein	protein_coding	protein_coding	0.197885	1.14702	0.0095144	0.0508531	Not regulated	63.11	63.15	63.39	67.84	71.82	79.55	70.68
Cad	<a href='https://www.ncbi.nlm.nih.gov/gene/?term=24240' target="_blank"> 24240 </a>	carbamoyl-phosphate synthetase 2, aspartate transcarbamylase, and dihydroorotase	protein_coding	protein_coding	0.240428	1.18134	0.000157983	0.0020637	Not regulated	17.85	17.96	16.93	17.86	20.94	20.12	21.54
Cadm1	<a href='https://www.ncbi.nlm.nih.gov/gene/?term=363058' target="_blank"> 363058 </a>	cell adhesion molecule 1	protein_coding	protein_coding	-0.590676	-1.50595	0.00040457	0.00443398	Down in F_UVB_WT_MG	7.84	7.7	7.33	5.98	4.26	5.31	6.31
Cadm2	<a href='https://www.ncbi.nlm.nih.gov/gene/?term=360687' target="_blank"> 360687 </a>	cell adhesion molecule 2	protein_coding	protein_coding	-0.576678	-1.49141	0.170723	0.372238	Not regulated	0.98	0.55	0.82	0.61	0.45	0.42	0.64
[truncated: 11,550 more rows]

## Sheet: Supplementary Table 2
FeatureID	EntrezID	Gene Name	TranscriptType	GeneBiotype	logFC	FC	PValue	FDR	Status	C_TG_914783_MG	C_TG_914001_MG	C_TG_396092_MG	C_TG_382924_MG	C_TG_904261_MG	U_TG_372932_MG	U_TG_91817_MG	U_TG_396532_MG	U_TG_380381_MG	U_TG_381797_MG
[truncated: 13,343 more rows]

[truncated: 2 more sheets: Supplementray Table 3, Supplementray Table 4]
